# Supplementary material for: Skeletally substituted aluminium and gallium carbenoids: a computational exploration
Source: Royal Society of Chemistry journal article supplement (doi:10.1039/d3dt00631j), 2023-01-01
Supplement: d3dt00631j1.pdf [file d3dt00631j1.pdf]

## Electronic Supplementary Information (ESI)

# Skeletally Substituted Aluminium and Gallium Carbenoids: A Computational Exploration

Sahtaz Ahmed, Israel Fernández,<sup>b\*</sup> and Ashwini K. Phukan\*

<sup>a</sup> Department of Chemical Sciences, Tezpur University, Napaam 784028, Assam, India, E-Mail: [ashwini@tezu.ernet.in](mailto:ashwini@tezu.ernet.in)

<sup>b</sup> Departamento de Química Orgánica and Centro de Innovación en Química Avanzada (ORFEO-CINQA), Facultad de Ciencias Químicas, Universidad Complutense de Madrid, 28040-Madrid, Spain. E-Mail: [israel@quim.ucm.es](mailto:israel@quim.ucm.es)

|                  |                                                                                                                                                                                                                                                                                                                                                                                                                                           |            |
|------------------|-------------------------------------------------------------------------------------------------------------------------------------------------------------------------------------------------------------------------------------------------------------------------------------------------------------------------------------------------------------------------------------------------------------------------------------------|------------|
| <b>Table S1</b>  | Calculated ( <b>M06-D3/Def2-TZVP</b> ) E–X bond lengths ( $r_1/r_2$ in Å), Wiberg Bond Index (WBI) values and N–E–X bond angles (in degrees) of the singlet state geometry of <b>1-13</b> (X = C, N or Si and E = Al or Ga).                                                                                                                                                                                                              | <b>S4</b>  |
| <b>Table S2</b>  | Calculated ( <b>M06-D3/Def2-TZVP</b> ) natural valence population ( $NP_N$ ) at the $\alpha$ -nitrogen atoms of ylidic Al(I)/Ga(I) carbenoids as well as their respective parent non-ylidic versions (It includes only the four-membered cyclic ylide decorate Al(I)/Ga(I) carbenoids and their respective parent non-ylidic versions).                                                                                                   | <b>S5</b>  |
| <b>Table S3</b>  | Calculated ( <b>M06-D3/Def2-TZVP</b> ) natural charges (q) and occupancies of the formally vacant valence p- orbital ( $Occ$ ) at the central atom (Al/Ga) for <b>1Al-13Al</b> and <b>1Ga-13Ga</b> . It also has the proton affinity (PA in kcal mol <sup>-1</sup> ) values for <b>1Al-13Al</b> and <b>1Ga-13Ga</b> .                                                                                                                     | <b>S6</b>  |
| <b>Table S4</b>  | Calculated ( <b>M06-D3/Def2-TZVP</b> ) Mulliken spin densities at the central atom (E =Al/Ga), $\alpha$ -nitrogen ( $N_\alpha$ ) and $\alpha$ -X atom ( $X_\alpha$ ) (where X=N, C, Si) with respect to the central atom for the molecules <b>1Al-13Al</b> and <b>1Ga-13Ga</b> .                                                                                                                                                          | <b>S7</b>  |
| <b>Table S5</b>  | Computed ( <b>M06-D3/Def2-TZVP</b> ) key geometrical parameters and occupancies of the formally vacant p- orbital ( $Occ_E$ ) and natural charges at pseudo hydridic ( $q_{H_{hy}}$ ) and the other hydrogen atom ( $q_H$ ) of the transition states involved in the activation of dihydrogen by some of the representative Al(I) and Ga(I) carbenoids.                                                                                   | <b>S8</b>  |
| <b>Table S6</b>  | Computed ( <b>M06-D3/Def2-TZVP</b> ) important geometrical parameters and natural charges (q) at the nitrogen atom of NH <sub>3</sub> and Al/Ga center for the loosely bound intermediate ( <b>Int</b> ) involved in the activation of N–H bond of NH <sub>3</sub> by some of the representative Al(I) and Ga(I) carbenoids.                                                                                                              | <b>S9</b>  |
| <b>Table S7</b>  | Computed ( <b>M06-D3/Def2-TZVP</b> ) key geometrical parameters, occupancies of the formally vacant p-orbital ( $Occ_E$ ) and natural charges at negatively polarized amide NH <sub>2</sub> moiety ( $q_{NH_2^{\delta-}}$ ) and hydrogen atom ( $q_{H^{\delta+}}$ ) of the transition states involved in the activation of ammonia by some of the representative Al(I) and Ga(I) carbenoids.                                              | <b>S10</b> |
| <b>Table S8</b>  | Computed ( <b>M06-D3/Def2-TZVP</b> ) key geometrical parameters, occupancies of the formally vacant p-orbital ( $Occ_E$ ) and natural charges at negatively polarized fluorine atom ( $q_{F^{\delta-}}$ ) and ipso – C – atom of the cationic F <sub>5</sub> C <sub>6</sub> moiety ( $q_{C_6F_5^+}$ ) of the transition states involved in the activation of hexa-fluorobenzene by some of the representative Al(I) and Ga(I) carbenoids. | <b>S11</b> |
| <b>Table S9</b>  | Computed ( <b>M06-D3/Def2-TZVP</b> ) key geometrical parameters, occupancies of the formally vacant p-orbital ( $Occ_E$ ) and natural charges at negatively polarized hydrogen atom ( $q_{H^{\delta-}}$ ) and cationic BPin moiety ( $q_{BPin^+}$ ) of the transition states involved in the activation of pinacolborane by some of the representative Al(I) and Ga(I) carbenoids.                                                        | <b>S12</b> |
| <b>Table S10</b> | Comparison of the energetics of some of the representative reactions calculated (in gas-phase) using three different levels of theory.                                                                                                                                                                                                                                                                                                    | <b>S13</b> |
| <b>Fig. S1</b>   | Correlation plots between the $E_\sigma$ (eV) and PA (kcal mol <sup>-1</sup> ) for (a) Al(I) carbenoids ( <b>1Al-13Al</b> ) and (b) Ga(I) carbenoids ( <b>1Ga-13Ga</b> ).                                                                                                                                                                                                                                                                 | <b>S14</b> |

|                 |                                                                                                                                                                                                                                           |                 |
|-----------------|-------------------------------------------------------------------------------------------------------------------------------------------------------------------------------------------------------------------------------------------|-----------------|
| <b>Fig. S2</b>  | Optimized geometries (at <b>M06-D3/Def2-TZVP</b> level theory) for the transition states involved in the activation of dihydrogen by some of the representative Al(I) and Ga(I) carbenoids.                                               | <b>S15-S16</b>  |
| <b>Fig. S3</b>  | Optimized geometries (at <b>M06-D3/Def2-TZVP</b> level theory) for the loosely bound intermediates involved in the activation of N–H bond of ammonia by some of the representative Al(I) and Ga(I) carbenoids.                            | <b>S17-S18</b>  |
| <b>Fig. S4</b>  | Optimized geometries (at <b>M06-D3/Def2-TZVP</b> level theory) for the transition states involved in the activation of N–H bond of ammonia by some of the representative Al(I) and Ga(I) carbenoids.                                      | <b>S18-S20</b>  |
| <b>Fig. S5</b>  | Optimized geometries (at <b>M06-D3/Def2-TZVP</b> level theory) for the transition states involved in the activation of C–F bond of hexa-fluorobenzene by some of the representative Al(I) and Ga(I) carbenoids.                           | <b>S21-S22</b>  |
| <b>Fig. S6</b>  | Optimized geometries (at <b>M06-D3/Def2-TZVP</b> level theory) for the van der Waals complexes involved in the activation of B–H bond of pinacolborane by some of the representative Al(I) and Ga(I) carbenoids.                          | <b>S23-S24</b>  |
| <b>Fig. S7</b>  | Optimized geometries (at <b>M06-D3/Def2-TZVP</b> level theory) for the transition states involved in the activation of B–H bond of pinacolborane by some of the representative Al(I) and Ga(I) carbenoids.                                | <b>S25-S27</b>  |
| <b>Fig. S8</b>  | Optimized geometries (at <b>M06-D3/Def2-TZVP</b> level theory) of the H–H splitting products attained for the reactions of dihydrogen with some of the representative Al(I) and Ga(I) carbenoids.                                         | <b>S27-S28</b>  |
| <b>Fig. S9</b>  | Optimized geometries (at <b>M06-D3/Def2-TZVP</b> level theory) of the N–H splitting products attained for the reactions of dihydrogen with some of the representative Al(I) and Ga(I) carbenoids.                                         | <b>S29-S30</b>  |
| <b>Fig. S10</b> | Optimized geometries (at <b>M06-D3/Def2-TZVP</b> level theory) of the C–F splitting products attained for the reactions of dihydrogen with some of the representative Al(I) and Ga(I) carbenoids.                                         | <b>S31-S32</b>  |
| <b>Fig. S11</b> | Optimized geometries (at <b>M06-D3/Def2-TZVP</b> level theory) of the B–H splitting products attained for the reactions of dihydrogen with some of the representative Al(I) and Ga(I) carbenoids.                                         | <b>S33-S34</b>  |
| <b>Fig. S12</b> | Correlation plots between $E_{\sigma}$ values and $\Delta G_{TS}^{0, X-Y^{\ddagger}}$ values obtained for Al/Ga carbenoids (where, X = B, C, H and Y = H, F) for activation of H <sub>2</sub> , C <sub>6</sub> F <sub>6</sub> and H–BPin. | <b>S35</b>      |
|                 | Cartesian coordinates of the optimized geometries                                                                                                                                                                                         | <b>S36-S243</b> |

**Table S1** Calculated (M06-D3/Def2-TZVP) E–X bond lengths ( $r_1/r_2$  in Å), Wiberg Bond Index (WBI) values and N–E–X bond angles (in degrees) of the singlet state geometry of **1-13** (X = C, N or Si and E = Al or Ga). The  $r_1$  and  $r_2$  are mentioned in Scheme 2.

| Molecules   | E-X ( $r_1/r_2$ ) | WBI ( $r_1/r_2$ ) | $\angle$ N-E-X | Molecules   | E-X ( $r_1/r_2$ ) | WBI ( $r_1/r_2$ ) | $\angle$ N-E-X |
|-------------|-------------------|-------------------|----------------|-------------|-------------------|-------------------|----------------|
| <b>1Al</b>  | 2.012/2.012       | 0.252/0.252       | 88.6           | <b>1Ga</b>  | 2.137/2.137       | 0.243/0.243       | 85.6           |
| <b>2Al</b>  | 2.183/1.911       | 0.175/0.266       | 87.9           | <b>2Ga</b>  | 2.416/2.024       | 0.142/0.283       | 84.2           |
| <b>3Al</b>  | 2.058/1.980       | 0.239/0.225       | 94.4           | <b>3Ga</b>  | 2.212/2.116       | 0.224/0.219       | 92.0           |
| <b>4Al</b>  | 1.980/2.064       | 0.305/0.411       | 89.9           | <b>4Ga</b>  | 2.106/2.130       | 0.303/0.441       | 87.4           |
| <b>5Al</b>  | 2.063/1.946       | 0.203/0.276       | 86.4           | <b>5Ga</b>  | 2.207/2.066       | 0.184/0.274       | 82.7           |
| <b>6Al</b>  | 2.063/1.996       | 0.229/0.474       | 87.6           | <b>6Ga</b>  | 2.216/2.054       | 0.211/0.521       | 84.4           |
| <b>7Al</b>  | 1.907/2.006       | 0.308/0.269       | 88.3           | <b>7Ga</b>  | 2.025/2.138       | 0.310/0.260       | 85.1           |
| <b>8Al</b>  | 1.975/1.936       | 0.265/0.279       | 91.8           | <b>8Ga</b>  | 2.189/2.067       | 0.230/0.277       | 88.8           |
| <b>9Al</b>  | 1.923/1.973       | 0.309/0.242       | 93.1           | <b>9Ga</b>  | 2.053/2.110       | 0.307/0.238       | 90.1           |
| <b>10Al</b> | 1.900/2.065       | 0.343/0.426       | 88.8           | <b>10Ga</b> | 2.012/2.131       | 0.357/0.461       | 86.1           |
| <b>11Al</b> | 1.919/1.955       | 0.282/0.289       | 86.4           | <b>11Ga</b> | 2.049/2.077       | 0.271/0.285       | 82.5           |
| <b>12Al</b> | 1.926/2.004       | 0.303/0.489       | 87.0           | <b>12Ga</b> | 2.057/2.060       | 0.299/0.542       | 84.0           |
| <b>13Al</b> | 1.910/1.910       | 0.322/0.322       | 87.6           | <b>13Ga</b> | 2.027/2.027       | 0.328/0.328       | 84.1           |

**Table S2** Calculated (M06-D3/Def2-TZVP) natural valence population ( $NP_N$ ) at the  $\alpha$ -nitrogen atoms of ylidic Al(I)/Ga(I) carbenoids as well as their respective parent non-ylidic versions (It includes only the four-membered cyclic ylide decorate Al(I)/Ga(I) carbenoids and their respective parent non-ylidic versions).

| <b>Non-ylidic Molecule</b> | <b><math>NP_N</math></b> | <b>Ylide-decorated Molecule</b> | <b><math>NP_N</math></b> |
|----------------------------|--------------------------|---------------------------------|--------------------------|
| <b>1Al/1Ga</b>             | 5.70/5.65                | <b>7Al/7Ga</b>                  | 6.22/6.17                |
| <b>2Al/2Ga</b>             | 5.55/5.49                | <b>8Al/8Ga</b>                  | 6.18/6.11                |
| <b>3Al/3Ga</b>             | 5.71/5.65                | <b>9Al/9Ga</b>                  | 6.23/6.19                |
| <b>4Al/4Ga</b>             | 5.71/5.65                | <b>10Al/10Ga</b>                | 6.19/6.14                |
| <b>5Al/5Ga</b>             | 5.66/5.61                | <b>11Al/11Ga</b>                | 6.18/6.14                |
| <b>6Al/6Ga</b>             | 5.64/5.58                | <b>12Al/12Ga</b>                | 6.15/6.09                |
|                            |                          | <b>13Al/13Ga</b>                | 6.21/6.17                |

**Table S3** Calculated (M06-D3/Def2-TZVP) natural charges (q) and occupancies of the formally vacant valence p- orbital (Occ) at the central atom (Al/Ga) for **1Al-13Al** and **1Ga-13Ga**. It also has the proton affinity (PA in kcal mol<sup>-1</sup>) values for **1Al-13Al** and **1Ga-13Ga**.

| <b>Molecules</b> | <b>PA</b> | <b>q<sub>Al</sub></b> | <b>Occ<sub>Al</sub></b> | <b>Molecules</b> | <b>PA</b> | <b>q<sub>Ga</sub></b> | <b>Occ<sub>Ga</sub></b> |
|------------------|-----------|-----------------------|-------------------------|------------------|-----------|-----------------------|-------------------------|
| <b>1Al</b>       | 255.9     | 0.719                 | 0.101                   | <b>1Ga</b>       | 230.6     | 0.710                 | 0.088                   |
| <b>2Al</b>       | 262.6     | 0.767                 | 0.176                   | <b>2Ga</b>       | 236.1     | 0.736                 | 0.120                   |
| <b>3Al</b>       | 265.2     | 0.759                 | 0.063                   | <b>3Ga</b>       | 238.1     | 0.748                 | 0.063                   |
| <b>4Al</b>       | 277.7     | 0.587                 | 0.101                   | <b>4Ga</b>       | 260.6     | 0.550                 | 0.101                   |
| <b>5Al</b>       | 253.7     | 0.736                 | 0.060                   | <b>5Ga</b>       | 227.2     | 0.731                 | 0.064                   |
| <b>6Al</b>       | 276.1     | 0.602                 | 0.085                   | <b>6Ga</b>       | 258.1     | 0.564                 | 0.092                   |
| <b>7Al</b>       | 270.3     | 0.698                 | 0.113                   | <b>7Ga</b>       | 246.7     | 0.684                 | 0.093                   |
| <b>8Al</b>       | 278.9     | 0.724                 | 0.157                   | <b>8Ga</b>       | 253.9     | 0.713                 | 0.127                   |
| <b>9Al</b>       | 275.5     | 0.733                 | 0.075                   | <b>9Ga</b>       | 251.1     | 0.711                 | 0.078                   |
| <b>10Al</b>      | 287.7     | 0.572                 | 0.089                   | <b>10Ga</b>      | 271.6     | 0.523                 | 0.094                   |
| <b>11Al</b>      | 267.9     | 0.703                 | 0.070                   | <b>11Ga</b>      | 244.2     | 0.691                 | 0.082                   |
| <b>12Al</b>      | 287.1     | 0.564                 | 0.095                   | <b>12Ga</b>      | 270.8     | 0.515                 | 0.100                   |
| <b>13Al</b>      | 278.9     | 0.667                 | 0.088                   | <b>13Ga</b>      | 257.2     | 0.643                 | 0.110                   |

**Table S4** Calculated (M06-D3/Def2-TZVP) Mulliken spin densities at the central atom (E =Al/Ga),  $\alpha$ -nitrogen ( $N_\alpha$ ) and  $\alpha$ -X atom ( $X_\alpha$ ) (where X=N, C, Si) with respect to the central atom for the molecules **1Al-13Al** and **1Ga-13Ga**.

| <b>Molecules</b> | <b>Al</b> | <b>N<math>\alpha</math></b> | <b>X<math>\alpha</math></b> | <b>Molecules</b> | <b>Ga</b> | <b>N<math>\alpha</math></b> | <b>X<math>\alpha</math></b> |
|------------------|-----------|-----------------------------|-----------------------------|------------------|-----------|-----------------------------|-----------------------------|
| <b>1Al</b>       | 0.913     | 0.090                       | 0.090                       | <b>1Ga</b>       | 0.159     | 0.284                       | 0.260                       |
| <b>2Al</b>       | 1.021     | 0.069                       | 0.060                       | <b>2Ga</b>       | 0.859     | 0.135                       | 0.144                       |
| <b>3Al</b>       | 0.907     | 0.069                       | 0.114                       | <b>3Ga</b>       | 0.715     | 0.125                       | 0.214                       |
| <b>4Al</b>       | 0.910     | 0.094                       | 0.090                       | <b>4Ga</b>       | 0.727     | 0.144                       | 0.211                       |
| <b>5Al</b>       | 0.998     | 0.057                       | 0.073                       | <b>5Ga</b>       | 0.856     | 0.133                       | 0.142                       |
| <b>6Al</b>       | 0.918     | 0.070                       | 0.085                       | <b>6Ga</b>       | 0.744     | 0.102                       | 0.210                       |
| <b>7Al</b>       | 0.999     | 0.069                       | 0.030                       | <b>7Ga</b>       | 0.029     | 0.092                       | 0.184                       |
| <b>8Al</b>       | 1.691     | 0.030                       | 0.071                       | <b>8Ga</b>       | 1.497     | 0.096                       | 0.166                       |
| <b>9Al</b>       | 0.865     | 0.053                       | 0.100                       | <b>9Ga</b>       | 0.019     | 0.045                       | 0.174                       |
| <b>10Al</b>      | 1.040     | 0.064                       | 0.057                       | <b>10Ga</b>      | 0.064     | 0.069                       | 0.250                       |
| <b>11Al</b>      | 0.870     | 0.010                       | 0.050                       | <b>11Ga</b>      | 0.664     | 0.246                       | 0.106                       |
| <b>12Al</b>      | 1.609     | 0.002                       | 0.034                       | <b>12Ga</b>      | 1.331     | 0.041                       | 0.209                       |
| <b>13Al</b>      | 1.748     | 0.026                       | 0.026                       | <b>13Ga</b>      | 0.050     | 0.018                       | -0.003                      |

**Table S5** Computed (**M06-D3/Def2-TZVP**) key geometrical parameters and occupancies of the formally vacant p- orbital ( $\text{Occ}_E$ ) and natural charges at pseudo hydridic ( $q_{\text{H}_{hy}}$ ) and the other hydrogen atom ( $q_{\text{H}}$ ) of the transition states involved in the activation of dihydrogen by some of the representative Al(I) and Ga(I) carbenoids. Bond angles ( $\angle X-E-N$ ,  $E = \text{Al, Ga}$  and  $X = \text{C, N, Si}$ ), bond lengths ( $E-N/E-X$ ) are given in degree ( $^\circ$ ) and in  $\text{\AA}$  respectively. Wiberg Bond Index (WBI) values are mentioned within parentheses.

| Molecules                   | $\text{H}_{hy}-\text{H}$ | $\text{E}-\text{H}$ | $\text{E}-\text{H}_{hy}$ | $\text{E}-\text{N}/\text{E}-\text{X}$ | $\angle X-E-N$ | $\text{Occ}_E$ | $q_{\text{H}_{hy}}$ | $q_{\text{H}}$ |
|-----------------------------|--------------------------|---------------------|--------------------------|---------------------------------------|----------------|----------------|---------------------|----------------|
| <b>1AlTS<sup>H-H</sup></b>  | 1.287<br>(0.220)         | 1.583<br>(0.731)    | 1.925<br>(0.709)         | 1.912/1.912                           | 96.5           | 0.365          | -0.221              | -0.145         |
| <b>4AlTS<sup>H-H</sup></b>  | 1.212<br>(0.256)         | 1.616<br>(0.667)    | 2.057<br>(0.598)         | 1.911/1.967                           | 97.8           | 0.607          | -0.265              | -0.188         |
| <b>6AlTS<sup>H-H</sup></b>  | 1.231<br>(0.247)         | 1.602<br>(0.697)    | 1.957<br>(0.656)         | 1.931/1.942                           | 95.2           | 0.570          | -0.220              | -0.153         |
| <b>8AlTS<sup>H-H</sup></b>  | 1.215<br>(0.256)         | 1.603<br>(0.685)    | 1.999<br>(0.648)         | 1.912/1.885                           | 98.1           | 0.769          | -0.253              | -0.164         |
| <b>10AlTS<sup>H-H</sup></b> | 1.216<br>(0.257)         | 1.617<br>(0.682)    | 1.977<br>(0.665)         | 1.860/1.977                           | 97.0           | 0.395          | -0.229              | -0.173         |
| <b>11AlTS<sup>H-H</sup></b> | 1.271<br>(0.229)         | 1.595<br>(0.710)    | 2.016<br>(0.685)         | 1.864/1.878                           | 93.5           | 0.385          | -0.272              | -0.177         |
| <b>13AlTS<sup>H-H</sup></b> | 1.270<br>(0.229)         | 1.603<br>(0.713)    | 2.034<br>(0.670)         | 1.855/1.848                           | 94.8           | 0.504          | -0.286              | -0.180         |
| <b>1GaTS<sup>H-H</sup></b>  | 1.412<br>(0.162)         | 1.551<br>(0.778)    | 1.944<br>(0.756)         | 1.969/1.969                           | 95.8           | 0.459          | -0.227              | -0.081         |
| <b>4GaTS<sup>H-H</sup></b>  | 1.339<br>(0.191)         | 1.578<br>(0.731)    | 2.060<br>(0.679)         | 1.993/1.992                           | 96.1           | 0.556          | -0.274              | -0.125         |
| <b>6GaTS<sup>H-H</sup></b>  | 1.350<br>(0.185)         | 1.570<br>(0.741)    | 2.008<br>(0.702)         | 2.026/1.958                           | 93.5           | 0.613          | -0.249              | -0.107         |
| <b>8GaTS<sup>H-H</sup></b>  | 1.347<br>(0.187)         | 1.566<br>(0.743)    | 2.007<br>(0.696)         | 1.992/1.947                           | 96.3           | 0.678          | -0.275              | -0.110         |
| <b>10GaTS<sup>H-H</sup></b> | 1.326<br>(0.198)         | 1.586<br>(0.730)    | 2.030<br>(0.695)         | 1.935/1.994                           | 95.4           | 0.431          | -0.259              | -0.128         |
| <b>11GaTS<sup>H-H</sup></b> | 1.392<br>(0.172)         | 1.559<br>(0.763)    | 2.004<br>(0.720)         | 1.939/1.936                           | 91.2           | 0.330          | -0.277              | -0.107         |
| <b>13GaTS<sup>H-H</sup></b> | 1.392<br>(0.173)         | 1.566<br>(0.759)    | 2.083<br>(0.693)         | 1.917/1.917                           | 92.7           | 0.359          | -0.328              | -0.129         |



**Table S6** Computed (M06-D3/Def2-TZVP) important geometrical parameters and natural charges (q) at the nitrogen atom of NH<sub>3</sub> and Al/Ga center for the loosely bound intermediate (**Int**) involved in the activation of N–H bond of NH<sub>3</sub> by some of the representative Al(I) and Ga(I) carbenoids. Bond lengths are given in Å and Wiberg Bond Index (WBI) values are given within parentheses.

| Molecules                    | Al-NH <sub>3</sub> | q <sub>Al</sub> | q <sub>NH<sub>3</sub></sub> | Molecules                    | Ga-NH <sub>3</sub> | q <sub>Ga</sub> | q <sub>NH<sub>3</sub></sub> |
|------------------------------|--------------------|-----------------|-----------------------------|------------------------------|--------------------|-----------------|-----------------------------|
| <b>1AlInt<sup>N-H</sup></b>  | 2.306<br>(0.176)   | 0.659           | -1.081                      | <b>1GaInt<sup>N-H</sup></b>  | 2.544<br>(0.140)   | 0.677           | -1.061                      |
| <b>4AlInt<sup>N-H</sup></b>  | 2.271<br>(0.190)   | 0.536           | -1.070                      | <b>4GaInt<sup>N-H</sup></b>  | 2.687<br>(0.125)   | 0.536           | -1.045                      |
| <b>6AlInt<sup>N-H</sup></b>  | 2.282<br>(0.184)   | 0.553           | -1.069                      | <b>6GaInt<sup>N-H</sup></b>  | 2.720<br>(0.116)   | 0.557           | -1.048                      |
| <b>8AlInt<sup>N-H</sup></b>  | 2.233<br>(0.188)   | 0.648           | -1.083                      | <b>8GaInt<sup>N-H</sup></b>  | 2.468<br>(0.153)   | 0.650           | -1.060                      |
| <b>10AlInt<sup>N-H</sup></b> | 2.263<br>(0.188)   | 0.522           | -1.065                      | <b>10GaInt<sup>N-H</sup></b> | –                  | –               | –                           |
| <b>11AlInt<sup>N-H</sup></b> | 2.261<br>(0.188)   | 0.638           | -1.078                      | <b>11GaInt<sup>N-H</sup></b> | 2.892<br>(0.085)   | 0.673           | -1.056                      |
| <b>13AlInt<sup>N-H</sup></b> | 2.338<br>(0.166)   | 0.620           | -1.065                      | <b>13GaInt<sup>N-H</sup></b> | –                  | –               | –                           |

**Table S7** Computed (M06-D3/Def2-TZVP) key geometrical parameters, occupancies of the formally vacant p-orbital ( $\text{Occ}_E$ ) and natural charges at negatively polarized amide  $\text{NH}_2$  moiety ( $q_{\text{NH}_2^{\delta-}}$ ) and hydrogen atom ( $q_{\text{H}^{\delta+}}$ ) of the transition states involved in the activation of ammonia by some of the representative Al(I) and Ga(I) carbenoids. Bond angles ( $\angle\text{X-E-N}$ ,  $E = \text{Al, Ga}$  and  $\text{X} = \text{C, N, Si}$ ), bond lengths ( $E - \text{N}/E - \text{X}$ ) are given in degree ( $^\circ$ ) and in  $\text{\AA}$  respectively. Wiberg Bond Index (WBI) values are mentioned within parentheses.

| Molecules                   | $\text{H}_2 \text{N}^{\delta-}-\text{H}^{\delta+}$ | $\text{H}_2 \text{N}^{\delta-}-E$ | $E-\text{H}^{\delta+}$ | $E-\text{N}/E-\text{X}$ | $\angle\text{X-E-N}$ | $q_{\text{NH}_2^{\delta-}}$ | $q_{\text{H}^{\delta+}}$ | $\text{Occ}_E$ |
|-----------------------------|----------------------------------------------------|-----------------------------------|------------------------|-------------------------|----------------------|-----------------------------|--------------------------|----------------|
| <b>1AlTS<sup>N-H</sup></b>  | 1.414<br>(0.304)                                   | 1.936<br>(0.531)                  | 1.710<br>(0.652)       | 1.952/ 1.959            | 93.4                 | -1.310                      | 0.091                    | 0.298          |
| <b>4AlTS<sup>N-H</sup></b>  | 1.368<br>(0.311)                                   | 1.962<br>(0.514)                  | 1.745<br>(0.641)       | 1.945/2.011             | 94.7                 | -1.322                      | 0.087                    | 0.310          |
| <b>6AlTS<sup>N-H</sup></b>  | 1.379<br>(0.306)                                   | 1.966<br>(0.509)                  | 1.733<br>(0.645)       | 1.988/1.966             | 91.9                 | -1.321                      | 0.095                    | 0.446          |
| <b>8AlTS<sup>N-H</sup></b>  | 1.385<br>(0.305)                                   | 1.981<br>(0.486)                  | 1.719<br>(0.648)       | 1.926/1.915             | 95.2                 | -1.329                      | 0.090                    | 0.564          |
| <b>10AlTS<sup>N-H</sup></b> | 1.361<br>(0.311)                                   | 1.979<br>(0.502)                  | 1.748<br>(0.645)       | 1.876/2.010             | 93.9                 | -1.322                      | 0.089                    | 0.452          |
| <b>11AlTS<sup>N-H</sup></b> | 1.392<br>(0.305)                                   | 1.945<br>(0.524)                  | 1.734<br>(0.653)       | 1.884/1.915             | 90.2                 | -1.325                      | 0.086                    | 0.378          |
| <b>13AlTS<sup>N-H</sup></b> | 1.382<br>(0.307)                                   | 1.958<br>(0.507)                  | 1.737<br>(0.655)       | 1.882/1.877             | 91.6                 | -1.327                      | 0.089                    | 0.557          |
| <b>1GaTS<sup>N-H</sup></b>  | 1.554<br>(0.241)                                   | 2.058<br>(0.544)                  | 1.645<br>(0.709)       | 2.019/2.017             | 93.4                 | -1.286                      | 0.056                    | 0.313          |
| <b>4GaTS<sup>N-H</sup></b>  | 1.536<br>(0.233)                                   | 2.102<br>(0.515)                  | 1.649<br>(0.708)       | 2.016/2.026             | 94.2                 | -1.281                      | 0.055                    | 0.292          |
| <b>6GaTS<sup>N-H</sup></b>  | 1.520<br>(0.240)                                   | 2.105<br>(0.505)                  | 1.653<br>(0.695)       | 2.069/1.979             | 91.0                 | -1.290                      | 0.059                    | 0.340          |
| <b>8GaTS<sup>N-H</sup></b>  | 1.556<br>(0.231)                                   | 2.056<br>(0.530)                  | 1.641<br>(0.712)       | 2.031/1.967             | 93.5                 | -1.281                      | 0.044                    | 0.348          |
| <b>10GaTS<sup>N-H</sup></b> | 1.613<br>(0.203)                                   | 2.390<br>(0.431)                  | 1.616<br>(0.740)       | 1.942/1.999             | 93.5                 | -1.255                      | -0.021                   | 0.342          |
| <b>11GaTS<sup>N-H</sup></b> | 1.522<br>(0.246)                                   | 2.070<br>(0.535)                  | 1.660<br>(0.701)       | 1.983/1.979             | 87.5                 | -1.300                      | 0.052                    | 0.177          |
| <b>13GaTS<sup>N-H</sup></b> | 1.518<br>(0.246)                                   | 2.076<br>(0.524)                  | 1.665<br>(0.702)       | 1.953/1.947             | 89.1                 | -1.291                      | 0.051                    | 0.498          |

**Table S8** Computed (M06-D3/Def2-TZVP) key geometrical parameters, occupancies of the formally vacant p-orbital ( $\text{Occ}_E$ ) and natural charges at negatively polarized fluorine atom ( $q_{F\delta^-}$ ) and ipso – C – atom of the cationic  $F_5C_6$  moiety ( $q_{C_6F_5}$ ) of the transition states involved in the activation of hexa-fluorobenzene by some of the representative Al(I) and Ga(I) carbenoids. Bond angles ( $\angle X-E-N$ ,  $E = \text{Al, Ga}$  and  $X = \text{C, N, Si}$ ), bond lengths ( $E - N/E - X$ ) are given in degree ( $^\circ$ ) and in Å respectively. Wiberg Bond Index (WBI) values are mentioned within parentheses.

| Molecules                   | $F_5 C_6-F\delta^-$ | $F_5 C_6-E$      | $E-F\delta^-$    | $E-N/E-X$    | $\angle X-E-N$ | $q_{C_6F_5}$ | $q_{F\delta^-}$ | $\text{Occ}_E$ |
|-----------------------------|---------------------|------------------|------------------|--------------|----------------|--------------|-----------------|----------------|
| <b>1AlTS<sup>C-F</sup></b>  | 1.458<br>(0.707)    | 2.350<br>(0.417) | 2.215<br>(0.159) | 1.941/ 1.941 | 93.2           | 0.054        | -0.399          | 0.227          |
| <b>4AlTS<sup>C-F</sup></b>  | 1.372<br>(0.831)    | 2.518<br>(0.319) | 2.895<br>(0.062) | 1.941/2.014  | 93.5           | 0.136        | -0.351          | 0.325          |
| <b>6AlTS<sup>C-F</sup></b>  | 1.409<br>(0.778)    | 2.400<br>(0.412) | 2.483<br>(0.109) | 1.967/1.941  | 92.6           | 0.086        | -0.367          | 0.209          |
| <b>8AlTS<sup>C-F</sup></b>  | 1.393<br>(0.790)    | 2.502<br>(0.370) | 2.710<br>(0.081) | 1.888/1.870  | 96.9           | 0.130        | -0.378          | 0.145          |
| <b>10AlTS<sup>C-F</sup></b> | 1.378<br>(0.818)    | 2.610<br>(0.362) | 2.795<br>(0.079) | 1.861/2.000  | 93.6           | 0.176        | -0.357          | 0.132          |
| <b>11AlTS<sup>C-F</sup></b> | 1.388<br>(0.808)    | 2.419<br>(0.400) | 2.603<br>(0.096) | 1.877/1.887  | 91.6           | 0.098        | -0.350          | 0.153          |
| <b>13AlTS<sup>C-F</sup></b> | 1.386<br>(0.806)    | 2.518<br>(0.373) | 2.681<br>(0.086) | 1.857/1.860  | 92.1           | 0.145        | -0.360          | 0.150          |
| <b>1GaTS<sup>C-F</sup></b>  | 1.588<br>(0.553)    | 2.201<br>(0.532) | 2.169<br>(0.212) | 1.993/1.992  | 93.1           | -0.029       | -0.477          | 0.186          |
| <b>6GaTS<sup>C-F</sup></b>  | 1.492<br>(0.658)    | 2.207<br>(0.535) | 2.377<br>(0.147) | 2.038/1.948  | 92.5           | -0.014       | -0.427          | 0.182          |
| <b>8GaTS<sup>C-F</sup></b>  | 1.477<br>(0.671)    | 2.289<br>(0.479) | 2.382<br>(0.139) | 1.997/1.951  | 96.3           | 0.032        | -0.429          | 0.133          |
| <b>10GaTS<sup>C-F</sup></b> | 1.382<br>(0.802)    | 2.487<br>(0.412) | 2.817<br>(0.077) | 1.940/2.028  | 92.0           | 0.160        | -0.368          | 0.158          |
| <b>11GaTS<sup>C-F</sup></b> | 1.624<br>(0.494)    | 1.977<br>(0.649) | 2.557<br>(0.112) | 1.888/1.884  | 94.9           | -0.252       | -0.529          | 0.149          |

**Table S9** Computed (M06-D3/Def2-TZVP) key geometrical parameters, occupancies of the formally vacant p-orbital ( $\text{Occ}_E$ ) and natural charges at negatively polarized hydrogen atom ( $q_{\text{H}^\delta}$ ) and cationic BPin moiety ( $q_{\text{BPin}}$ ) of the transition states involved in the activation of pinacolborane by some of the representative Al(I) and Ga(I) carbenoids. Bond angles ( $\angle\text{X-E-N}$ , E = Al, Ga and X = C, N, Si), bond lengths (E – N/E – X) are given in degree ( $^\circ$ ) and in Å respectively. Wiberg Bond Index (WBI) values are mentioned within parentheses.

| Molecules                   | $\text{H}^\delta\text{-B}_{\text{pin}}$ | $\text{E-B}_{\text{Pin}}$ | $\text{E-H}^\delta$ | $\text{E-N/E-X}$ | $\angle\text{X-E-N}$ | $q_{\text{H}^\delta}$ | $q_{\text{BPin}}$ | $\text{Occ}_E$ |
|-----------------------------|-----------------------------------------|---------------------------|---------------------|------------------|----------------------|-----------------------|-------------------|----------------|
| <b>1AITS<sup>B-H</sup></b>  | 1.494<br>(0.567)                        | 2.021<br>(0.973)          | 1.814<br>(0.355)    | 1.909/1.910      | 96.5                 | -0.158                | 0.319             | 0.504          |
| <b>4AITS<sup>B-H</sup></b>  | 1.485<br>(0.595)                        | 2.014<br>(0.961)          | 1.841<br>(0.319)    | 1.891/1.966      | 99.2                 | -0.165                | 0.257             | 0.471          |
| <b>6AITS<sup>B-H</sup></b>  | 1.518<br>(0.554)                        | 2.020<br>(0.965)          | 1.819<br>(0.344)    | 1.917/1.920      | 96.1                 | -0.176                | 0.319             | 0.499          |
| <b>8AITS<sup>B-H</sup></b>  | 1.525<br>(0.564)                        | 2.013<br>(0.944)          | 1.847<br>(0.332)    | 1.876/1.856      | 100.1                | -0.202                | 0.277             | 0.444          |
| <b>10AITS<sup>B-H</sup></b> | 1.531<br>(0.569)                        | 2.012<br>(0.952)          | 1.841<br>(0.326)    | 1.828/1.952      | 98.2                 | -0.198                | 0.268             | 0.469          |
| <b>11AITS<sup>B-H</sup></b> | 1.538<br>(0.555)                        | 2.003<br>(0.969)          | 1.817<br>(0.346)    | 1.833/1.863      | 94.2                 | -0.190                | 0.293             | 0.490          |
| <b>13AITS<sup>B-H</sup></b> | 1.548<br>(0.557)                        | 2.008<br>(0.958)          | 1.841<br>(0.331)    | 1.828/1.831      | 95.7                 | -0.215                | 0.280             | 0.472          |
| <b>1GaTS<sup>B-H</sup></b>  | 1.661<br>(0.444)                        | 1.999<br>(1.005)          | 1.806<br>(0.471)    | 1.969/1.968      | 95.0                 | -0.162                | 0.460             | 0.545          |
| <b>4GaTS<sup>B-H</sup></b>  | 1.653<br>(0.469)                        | 1.993<br>(1.006)          | 1.831<br>(0.434)    | 1.955/1.982      | 98.0                 | -0.173                | 0.410             | 0.521          |
| <b>6GaTS<sup>B-H</sup></b>  | 1.683<br>(0.438)                        | 1.998<br>(0.997)          | 1.827<br>(0.451)    | 2.005/1.937      | 94.3                 | -0.184                | 0.454             | 0.540          |
| <b>8GaTS<sup>B-H</sup></b>  | 1.705<br>(0.426)                        | 1.992<br>(0.985)          | 1.825<br>(0.459)    | 1.966/1.917      | 98.1                 | -0.217                | 0.448             | 0.502          |
| <b>10GaTS<sup>B-H</sup></b> | 1.695<br>(0.452)                        | 1.992<br>(0.997)          | 1.846<br>(0.432)    | 1.904/1.970      | 96.2                 | -0.205                | 0.420             | 0.514          |
| <b>11GaTS<sup>B-H</sup></b> | 1.718<br>(0.427)                        | 1.982<br>(1.010)          | 1.811<br>(0.466)    | 1.908/1.921      | 92.6                 | -0.195                | 0.456             | 0.542          |
| <b>13GaTS<sup>B-H</sup></b> | 1.722<br>(0.435)                        | 1.985<br>(1.000)          | 1.843<br>(0.439)    | 1.898/1.892      | 93.1                 | -0.229                | 0.439             | 0.513          |

**Table S10** Comparison of the Activation Energy Barriers ( $\Delta G_{\text{TS}}^0 \text{X-Y}^\ddagger$ ) and Reaction Free Energies for the formation of the Intermediates ( $\Delta G_{\text{Int}}^0 \text{X-Y}$ ), van der Waals complexes ( $\Delta G_{\text{V}}^0 \text{X-Y}$ ) and the X–Y (**X = B, C, H, N** and **Y = F, H**) bond splitting products ( $\Delta G_{\text{Total}}^0 \text{X-Y}$ ) for the activation of H<sub>2</sub>, NH<sub>3</sub>, C<sub>6</sub>F<sub>6</sub> and pinacolborane by some of the representative Al(I) and Ga(I) carbenoids calculated at different levels of theory (in gas-phase) using **Def2-TZVP** basis set. The energies are given in kcal mol<sup>-1</sup>.

| Substrates                    | Molecules | Level of Theory | $\Delta G_{\text{Int}}^0 \text{X-Y}$ | $\Delta G_{\text{V}}^0 \text{X-Y}$ | $\Delta G_{\text{TS}}^0 \text{X-Y}^\ddagger$ | $\Delta G_{\text{Total}}^0 \text{X-Y}$ |
|-------------------------------|-----------|-----------------|--------------------------------------|------------------------------------|----------------------------------------------|----------------------------------------|
| H <sub>2</sub>                | 1Al       | PBE0-D3         | –                                    | –                                  | 39.6                                         | -28.5                                  |
|                               |           | M062X-D3        | –                                    | –                                  | 46.1                                         | -25.2                                  |
|                               |           | B3PW91-D3       | –                                    | –                                  | 40.5                                         | -27.4                                  |
|                               |           | M06-D3          | –                                    | –                                  | 41.5                                         | -29.2                                  |
|                               | 4Al       | PBE0-D3         | –                                    | –                                  | 31.8                                         | -30.3                                  |
|                               |           | M062X-D3        | –                                    | –                                  | 37.6                                         | -27.6                                  |
|                               |           | B3PW91-D3       | –                                    | –                                  | 32.5                                         | -29.6                                  |
|                               |           | M06-D3          | –                                    | –                                  | 33.3                                         | -30.9                                  |
| NH <sub>3</sub>               | 6Al       | PBE0-D3         | 2.7                                  | –                                  | 26.9                                         | -44.2                                  |
|                               |           | M062X-D3        | 2.9                                  | –                                  | 29.5                                         | -46.4                                  |
|                               |           | B3PW91-D3       | 3.6                                  | –                                  | 27.4                                         | -44.1                                  |
|                               |           | M06-D3          | 3.2                                  | –                                  | 29.2                                         | -45.7                                  |
| C <sub>6</sub> F <sub>6</sub> | 1Al       | PBE0-D3         | –                                    | –                                  | 18.7                                         | -103.4                                 |
|                               |           | M062X-D3        | –                                    | –                                  | 21.1                                         | -107.1                                 |
|                               |           | B3PW91-D3       | –                                    | –                                  | 18.7                                         | -103.8                                 |
|                               |           | M06-D3          | –                                    | –                                  | 20.1                                         | -100.2                                 |
| HB <sub>Pin</sub>             | 4Al       | PBE0-D3         | –                                    | 3.6                                | 4.9                                          | -20.0                                  |
|                               |           | M062X-D3        | –                                    | 4.2                                | 8.8                                          | -17.5                                  |
|                               |           | B3PW91-D3       | –                                    | 3.4                                | 5.3                                          | -20.0                                  |
|                               |           | M06-D3          | –                                    | 1.9                                | 7.8                                          | -18.2                                  |

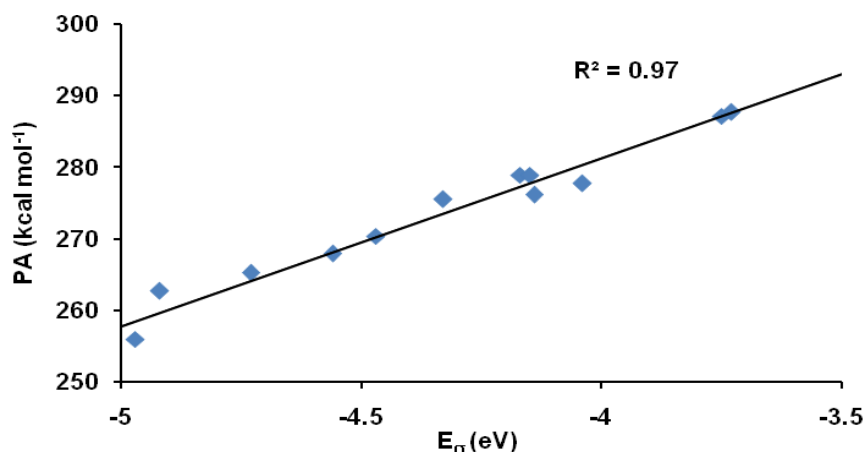

(a)

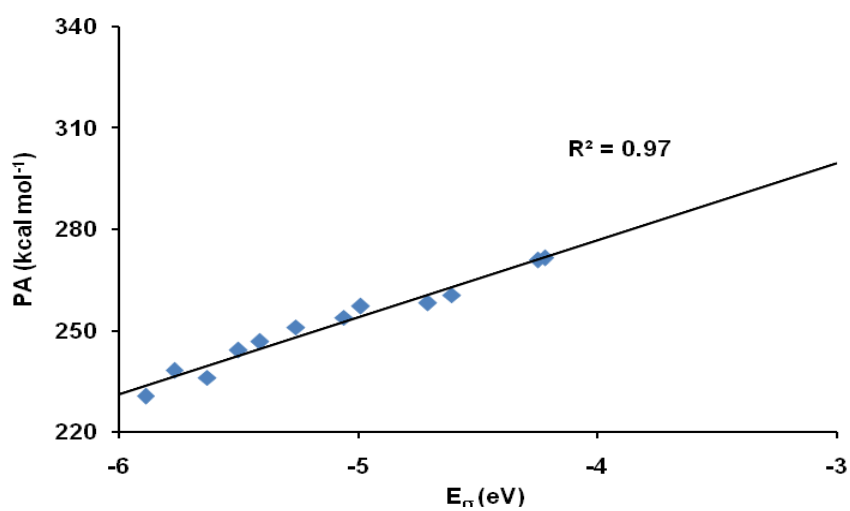

(b)

**Fig. S1** Correlation plots between the  $E_{\sigma}$  (eV) and PA (kcal mol<sup>-1</sup>) for (a) Al(I) carbenoids (1Al–13Al) and (b) Ga(I) carbenoids (1Ga–13Ga).

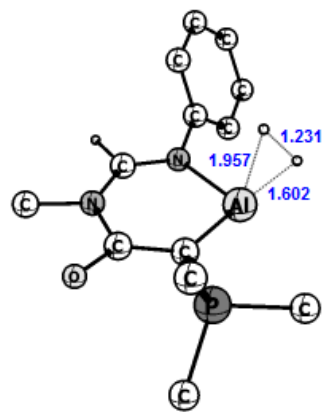

**6AITSH-H**

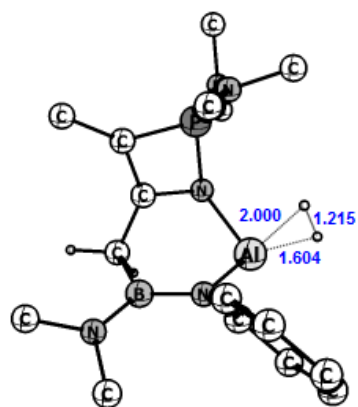

**8AITSH-H**

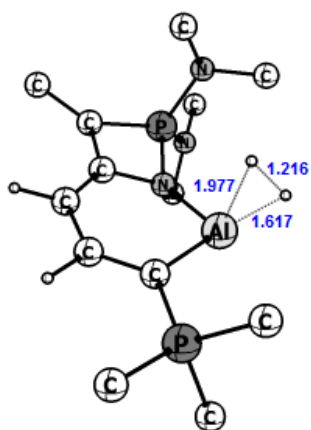

**10AITSH-H**

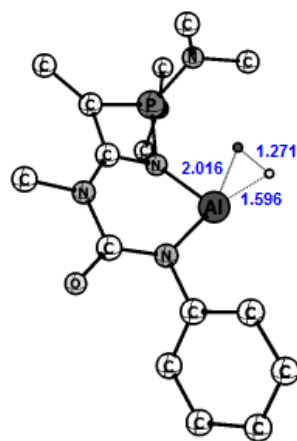

**11AITSH-H**

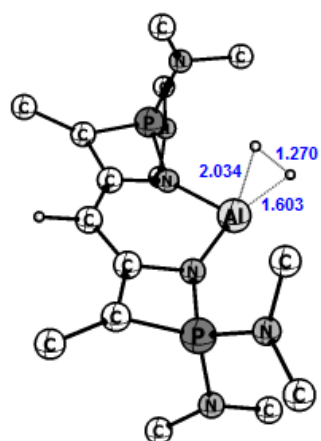

**13AITSH-H**

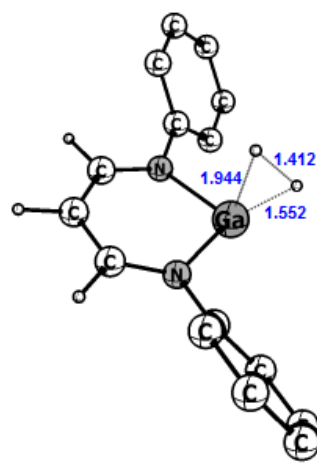

**1GaTSH-H**

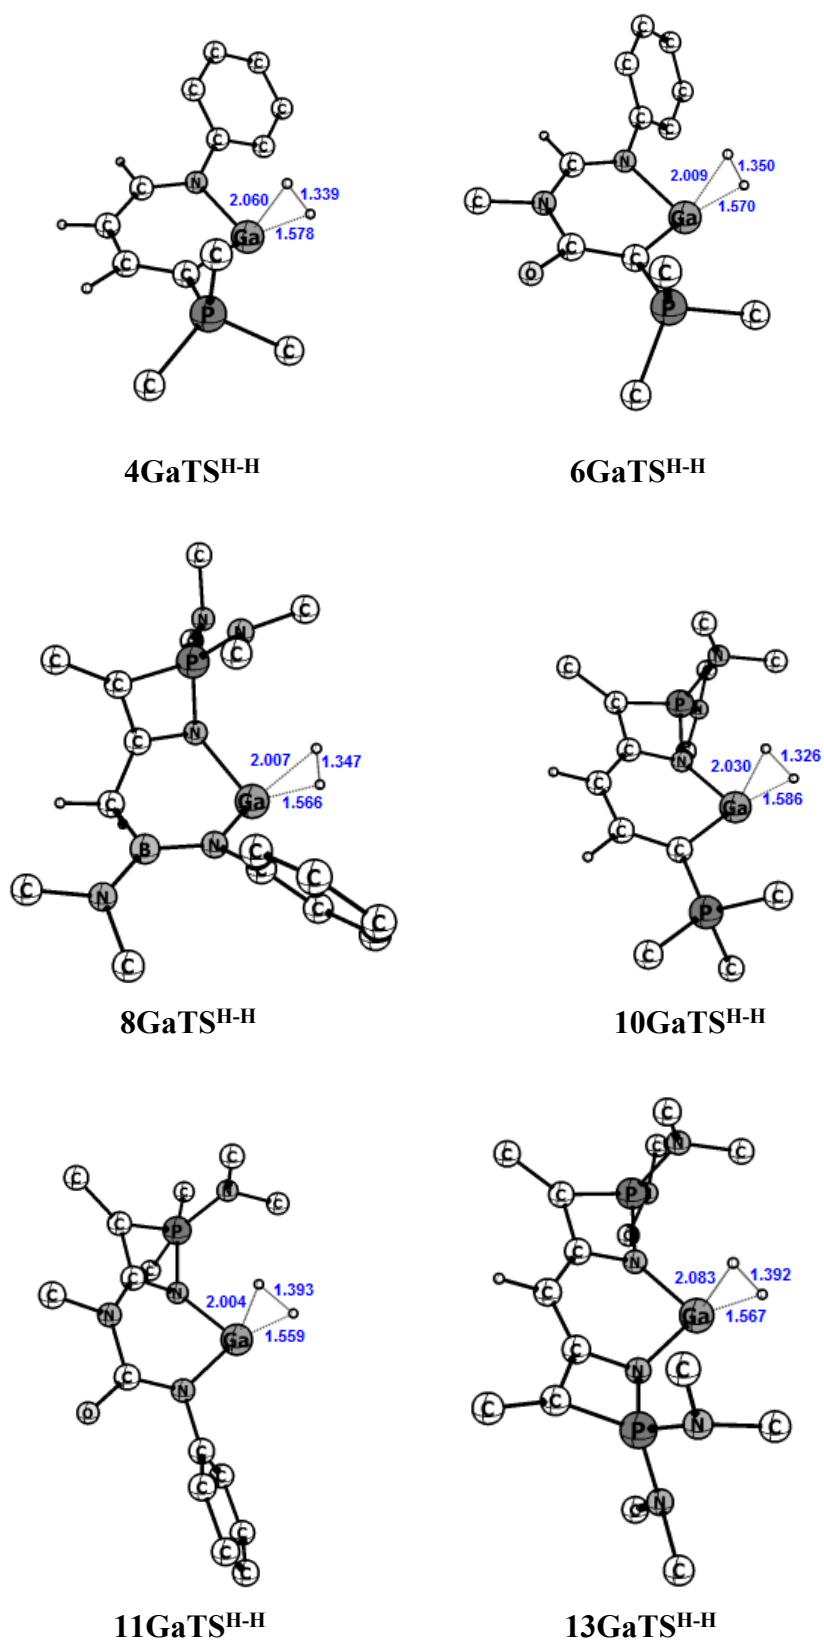

**Fig. S2** Optimized geometries (at M06-D3/Def2-TZVP level theory) for the transition states involved in the activation of dihydrogen by some of the representative Al(I) and Ga(I) carbenoids. The hydrogen atoms of the phenyl and methyl groups are omitted for clarity.



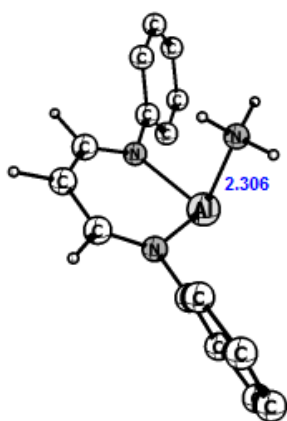

1AlInt<sup>N-H</sup>

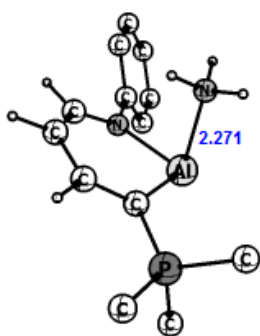

4AlInt<sup>N-H</sup>

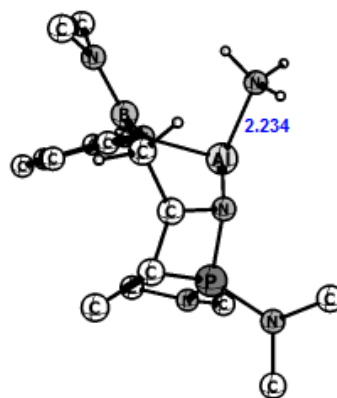

8AlInt<sup>N-H</sup>

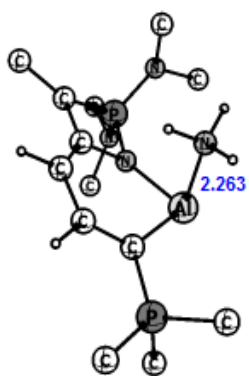

10AlInt<sup>N-H</sup>

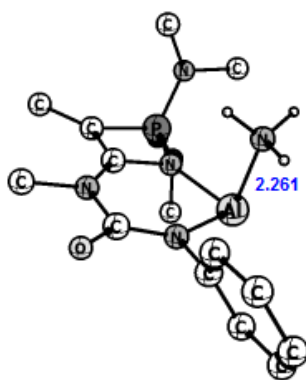

11AlInt<sup>N-H</sup>

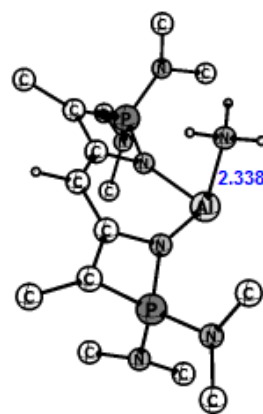

13AlInt<sup>N-H</sup>

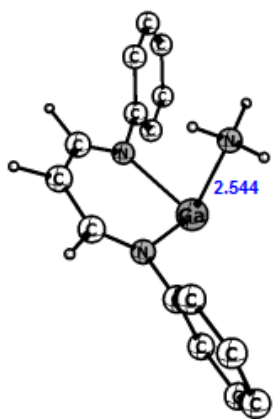

1GaInt<sup>N-H</sup>

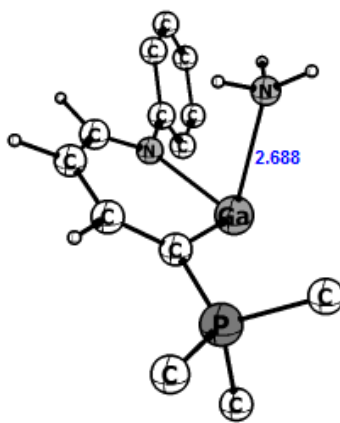

4GaInt<sup>N-H</sup>

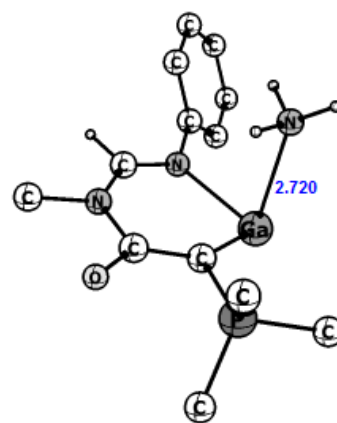

6GaInt<sup>N-H</sup>

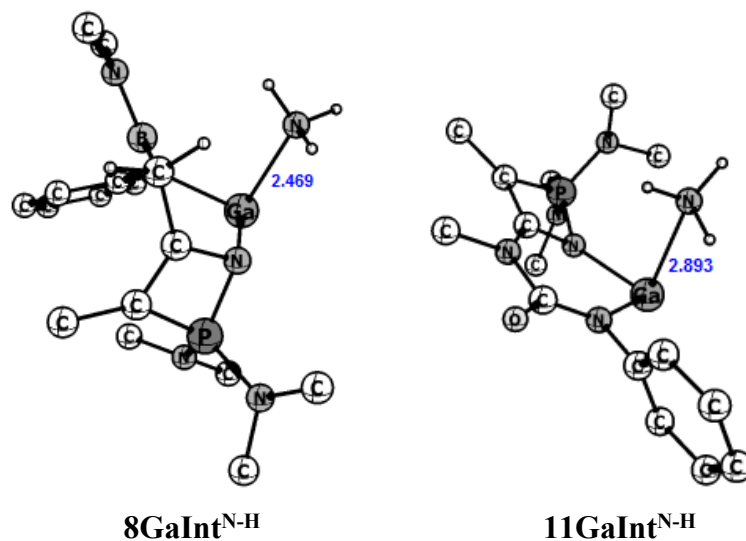

**Fig. S3** Optimized geometries (at **M06-D3/Def2-TZVP** level theory) for the loosely bound intermediates involved in the activation of N–H bond of ammonia by some of the representative Al(I) and Ga(I) carbenoids. The hydrogen atoms of the phenyl and methyl groups are omitted for clarity.

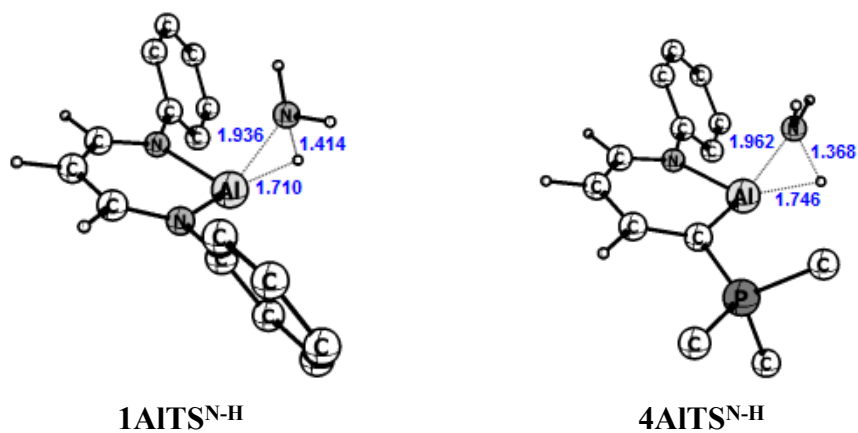

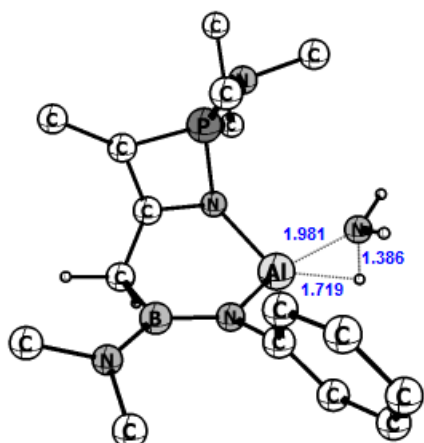

8AITS<sup>N-H</sup>

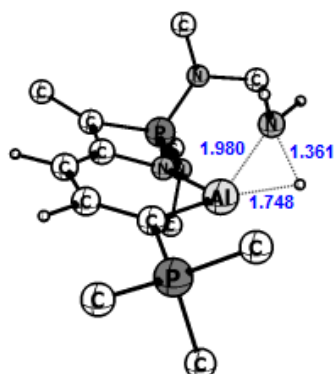

10AITS<sup>N-H</sup>

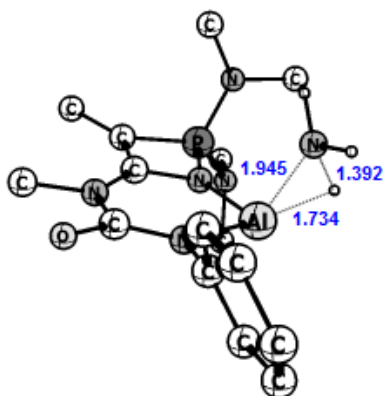

11AITS<sup>N-H</sup>

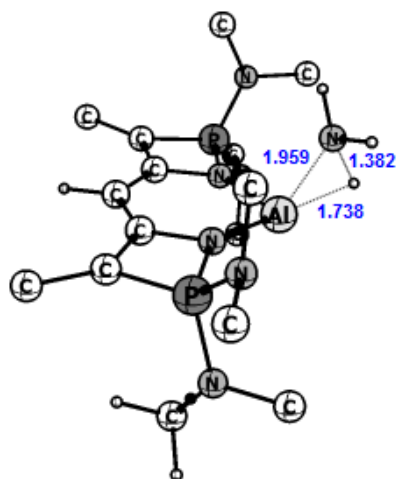

13AITS<sup>N-H</sup>

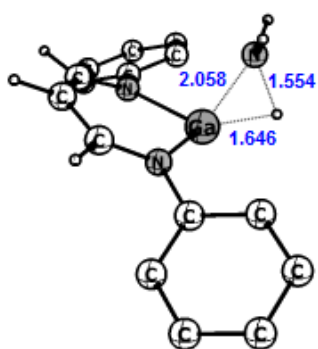

1GaTS<sup>N-H</sup>

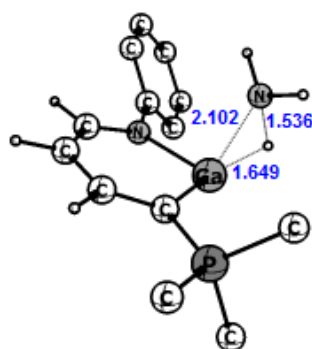

4GaTS<sup>N-H</sup>

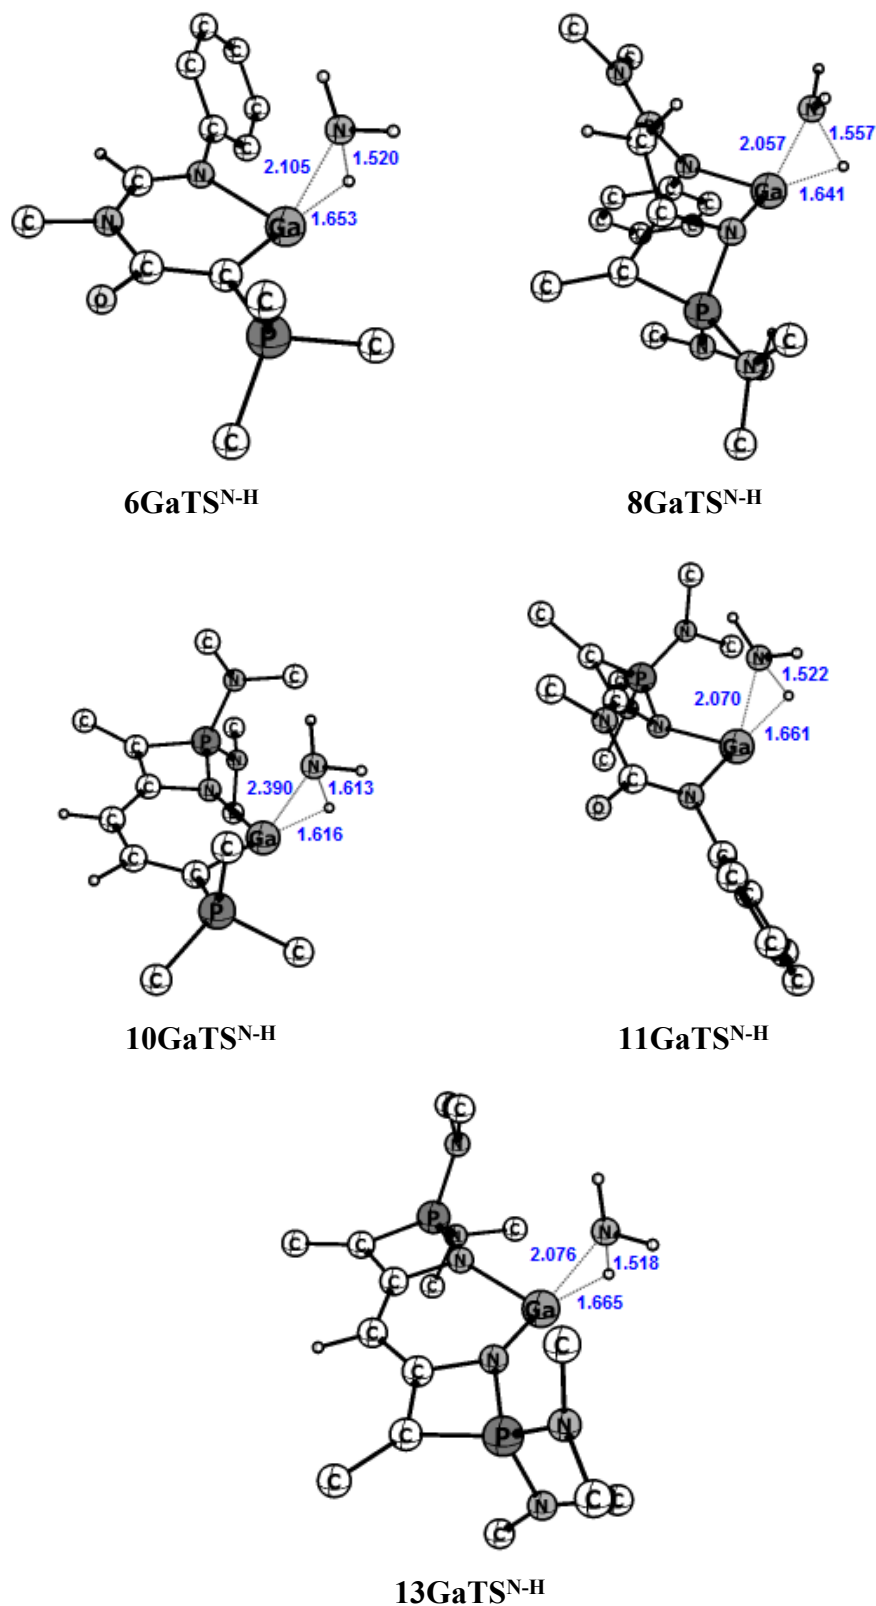

**Fig. S4** Optimized geometries (at M06-D3/Def2-TZVP level theory) for the transition states involved in the activation of N–H bond of ammonia by some of the representative Al(I) and Ga(I) carbenoids. The hydrogen atoms of the phenyl and methyl groups are omitted for clarity.

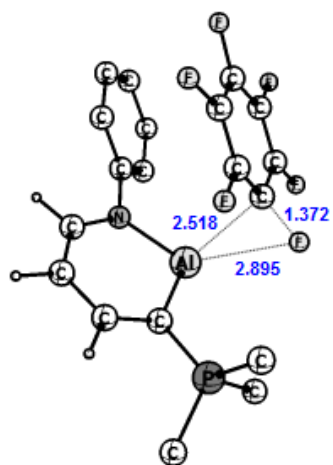

4AITS<sup>C-F</sup>

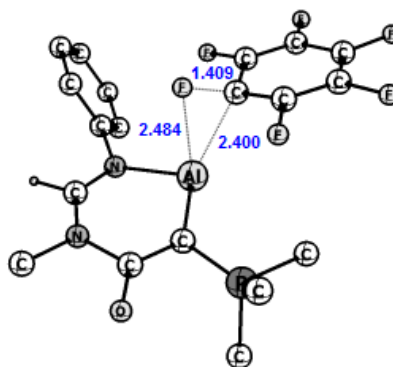

6AITS<sup>C-F</sup>

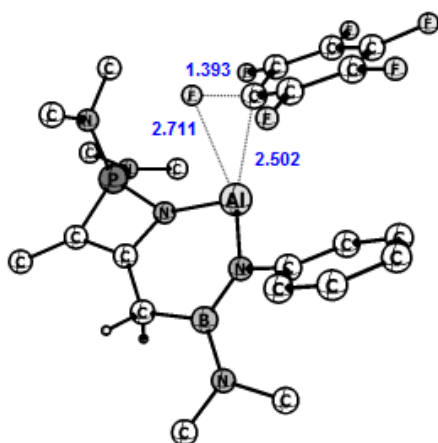

8AITS<sup>C-F</sup>

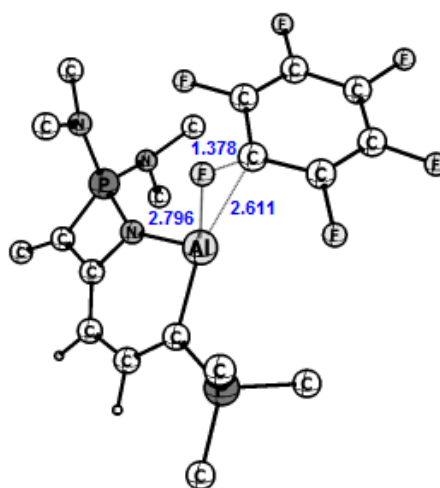

10AITS<sup>C-F</sup>

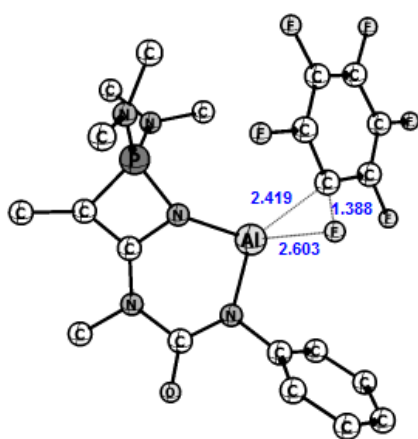

11AITS<sup>C-F</sup>

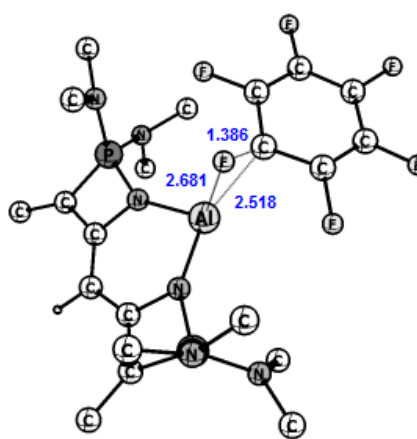

13AITS<sup>C-F</sup>

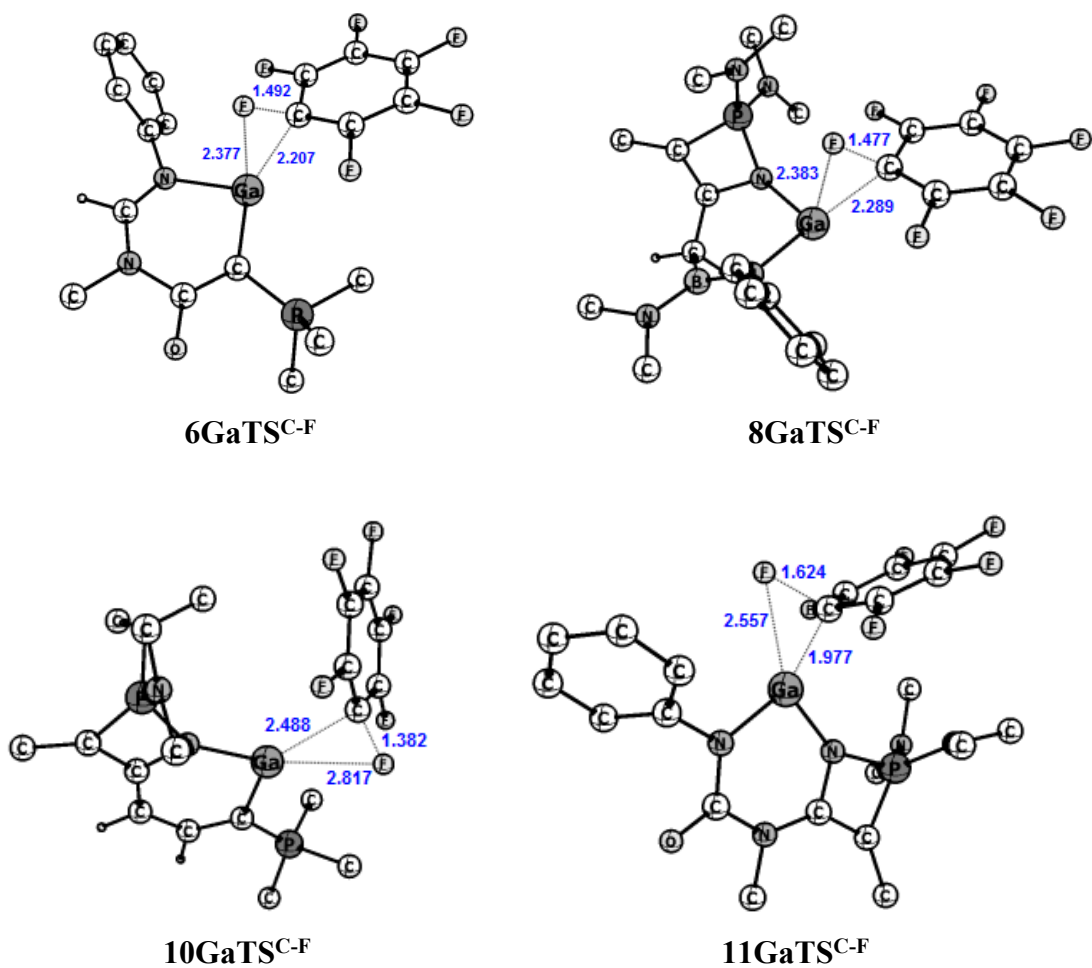

**Fig. S5** Optimized geometries (at M06-D3/Def2-TZVP level theory) for the transition states involved in the activation of C–F bond of hexa-fluorobenzene by some of the representative Al(I) and Ga(I) carbenoids. The hydrogen atoms of the phenyl and methyl groups are omitted for clarity.

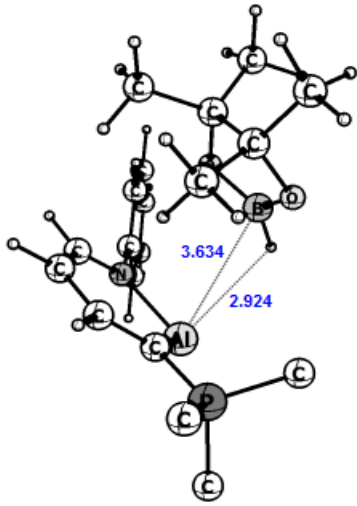

4Alv<sup>B-H</sup>

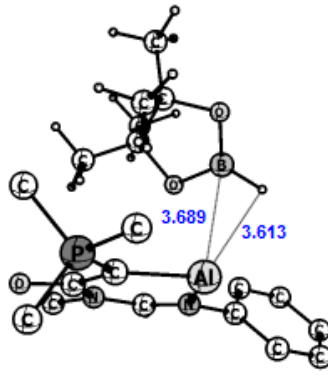

6Alv<sup>B-H</sup>

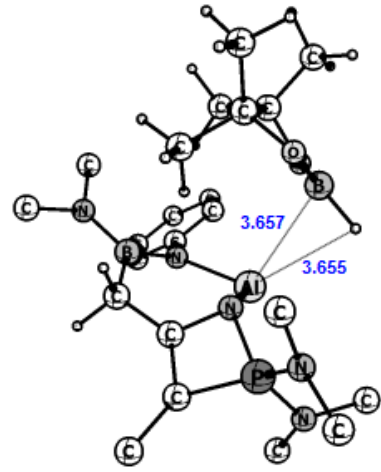

8Alv<sup>B-H</sup>

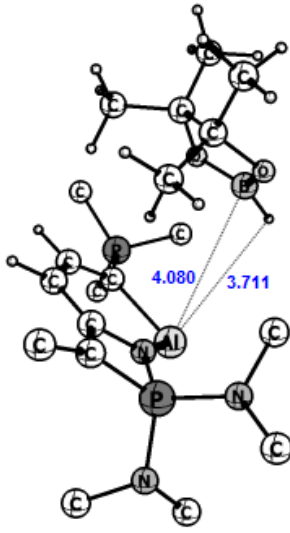

10Alv<sup>B-H</sup>

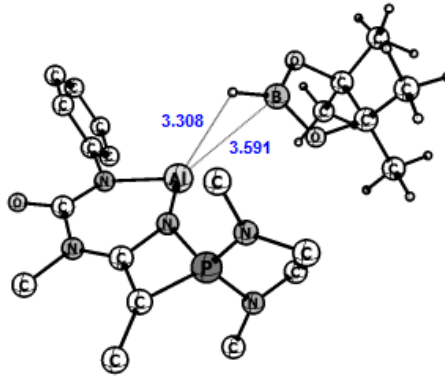

11Alv<sup>B-H</sup>

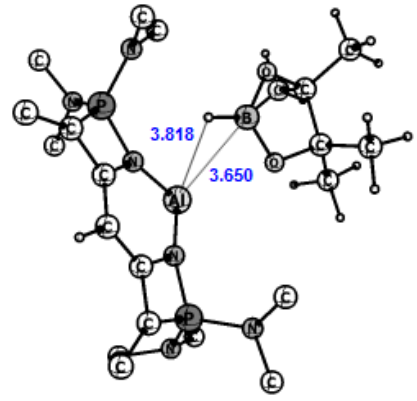

13Alv<sup>B-H</sup>

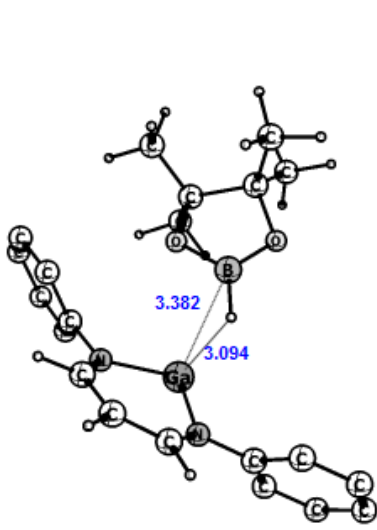

1Gav<sup>B-H</sup>

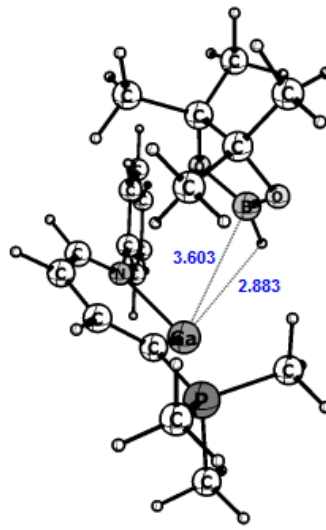

4Gav<sup>B-H</sup>

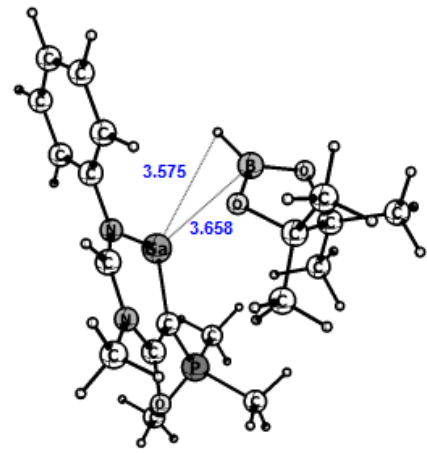

6Gav<sup>B-H</sup>

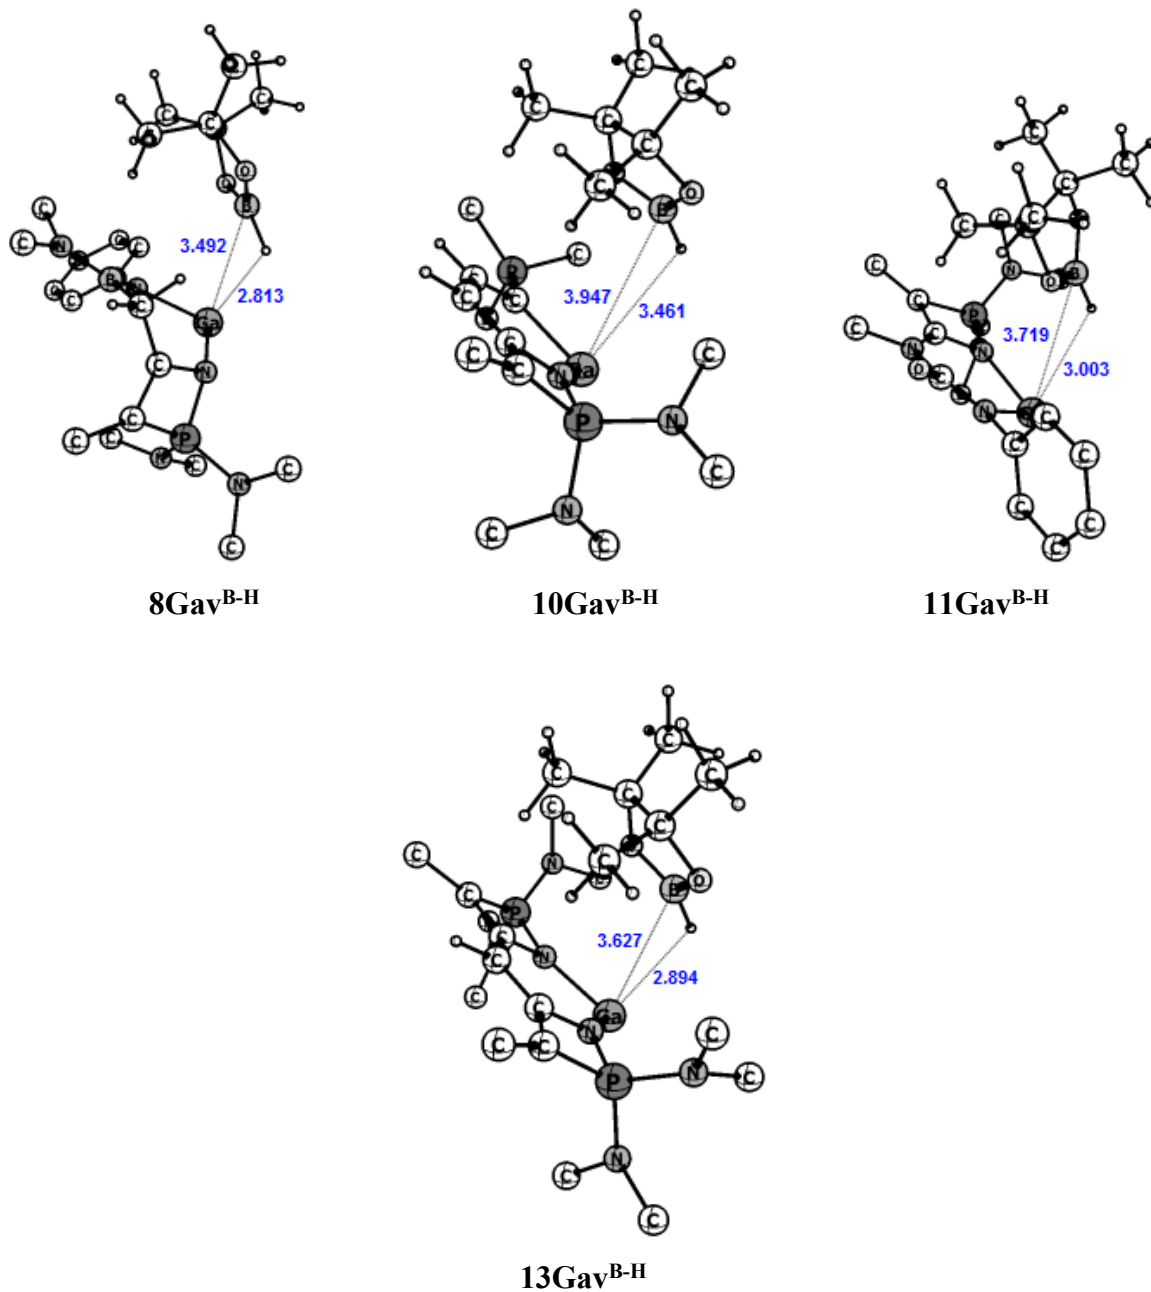

**Fig. S6** Optimized geometries (at **M06-D3/Def2-TZVP** level theory) for the van der Waals complexes involved in the activation of B–H bond of pinacolborane by some of the representative Al(I) and Ga(I) carbenoids. The hydrogen atoms of the phenyl and methyl groups are omitted for clarity.



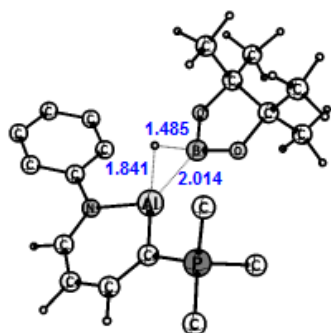

4AITS<sup>B-H</sup>

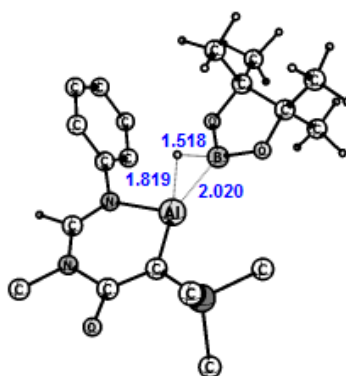

6AITS<sup>B-H</sup>

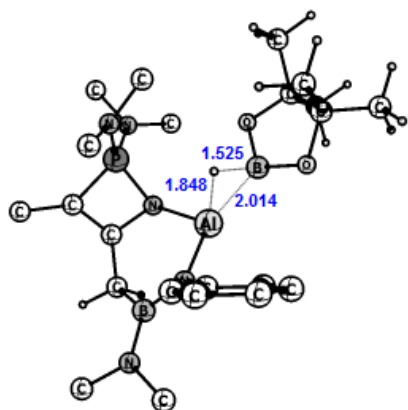

8AITS<sup>B-H</sup>

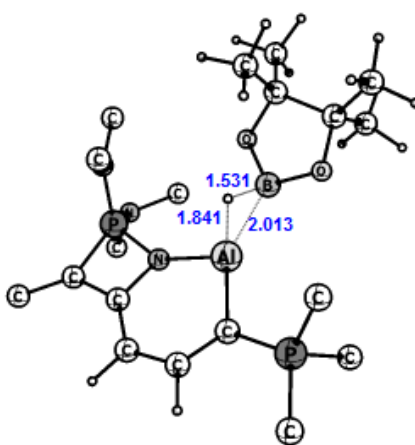

10AITS<sup>B-H</sup>

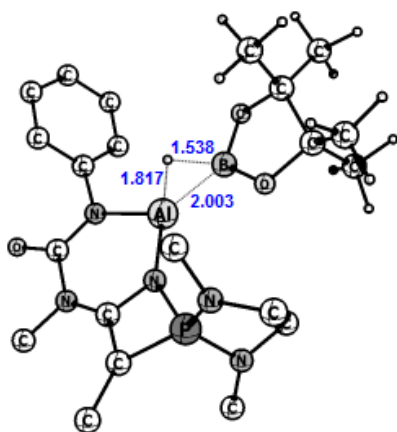

11AITS<sup>B-H</sup>

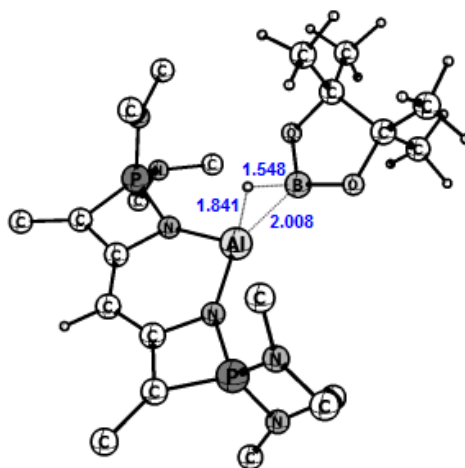

13AITS<sup>B-H</sup>

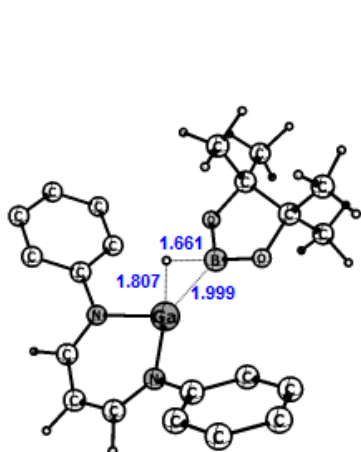

1GaTS<sup>B-H</sup>

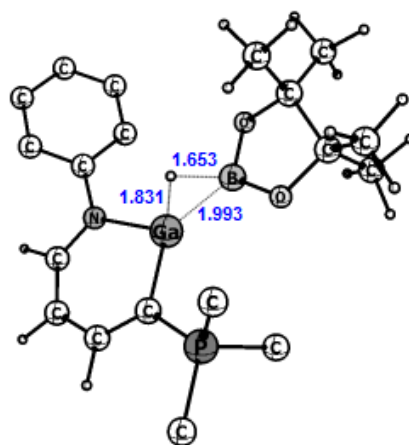

4GaTS<sup>B-H</sup>

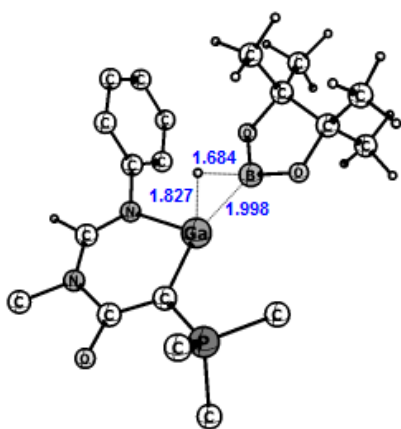

6GaTS<sup>B-H</sup>

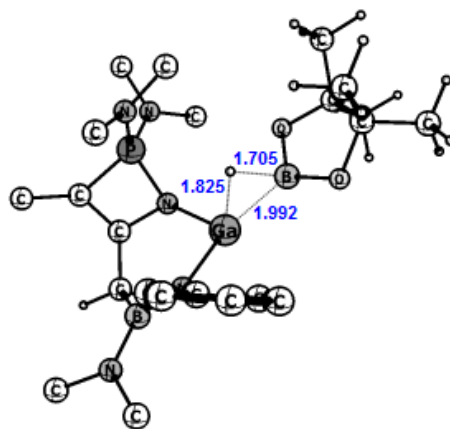

8GaTS<sup>B-H</sup>

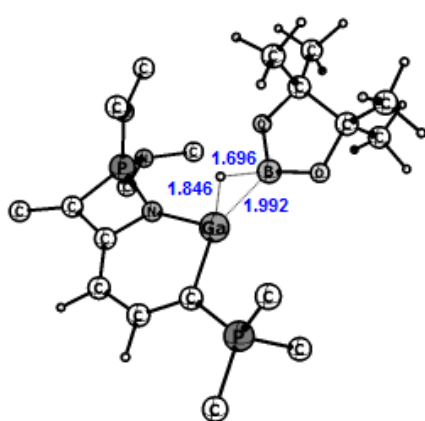

10GaTS<sup>B-H</sup>

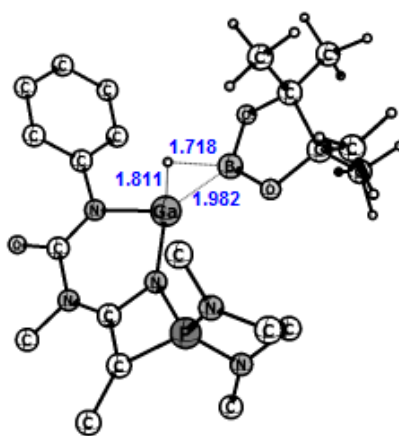

11GaTS<sup>B-H</sup>

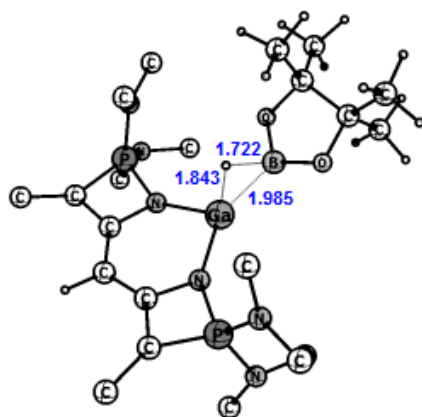

**13GaTS<sup>B-H</sup>**

**Fig. S7** Optimized geometries (at M06-D3/Def2-TZVP level theory) for the transition states involved in the activation of B–H bond of pinacolborane by some of the representative Al(I) and Ga(I) carbenoids. The hydrogen atoms of the phenyl and methyl groups are omitted for clarity.

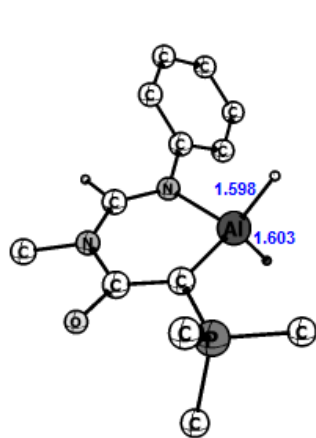

**6AlP<sup>H-H</sup>**

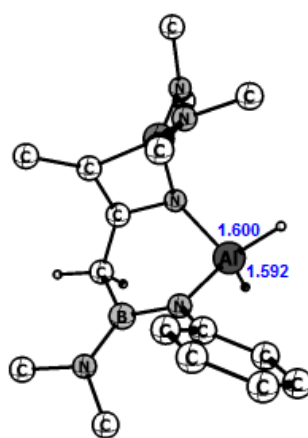

**8AlP<sup>H-H</sup>**

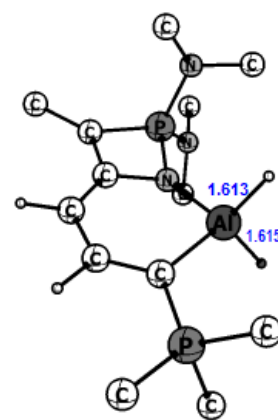

**10AlP<sup>H-H</sup>**

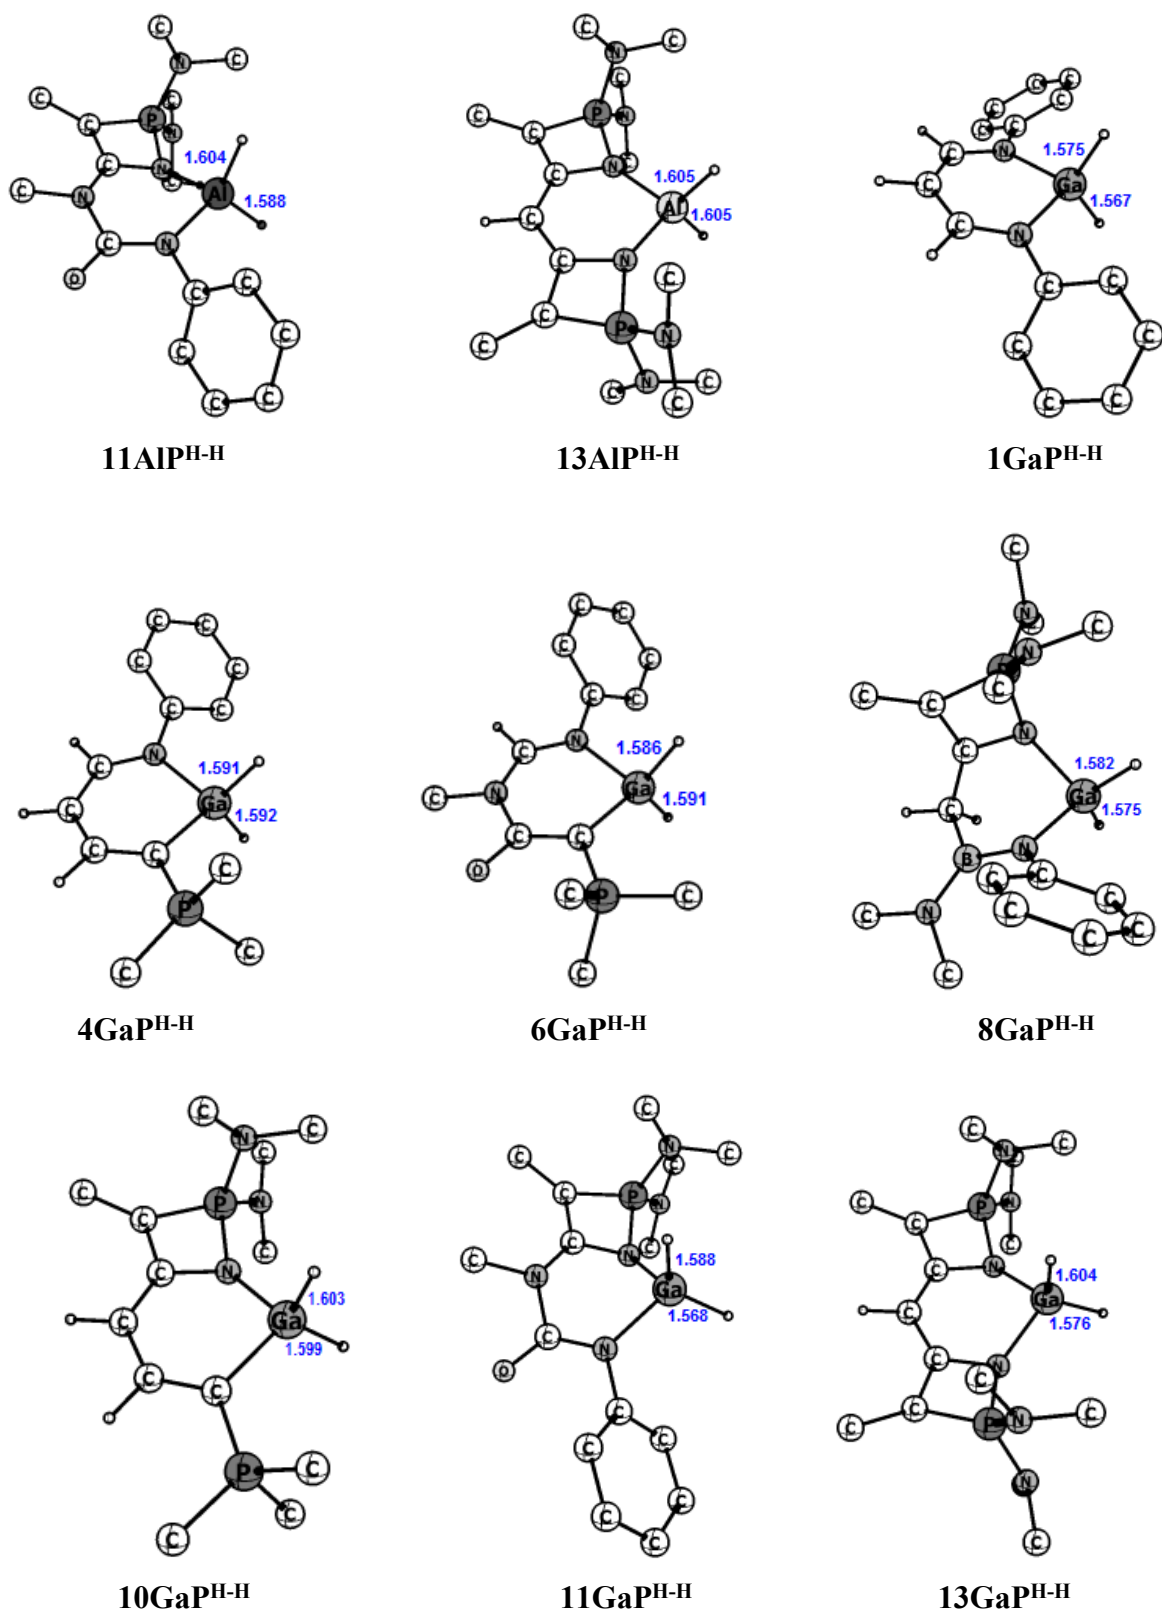

**Fig. S8** Optimized geometries (at M06-D3/Def2-TZVP level theory) of the H-H splitting products attained for the reactions of dihydrogen with some of the representative Al(I) and Ga(I) carbenoids. The hydrogen atoms of the phenyl and methyl groups are omitted for clarity.

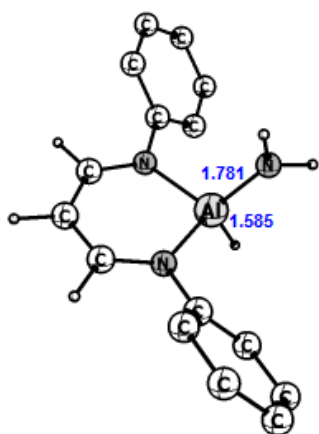

1AIP<sup>N-H</sup>

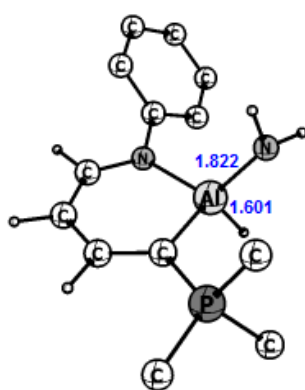

4AIP<sup>N-H</sup>

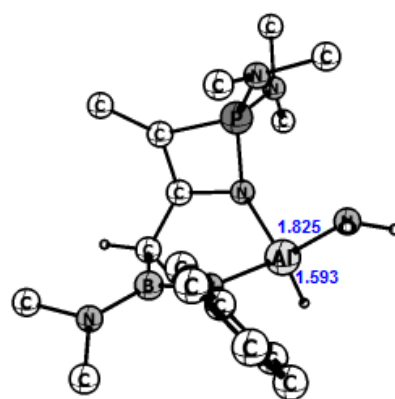

8AIP<sup>N-H</sup>

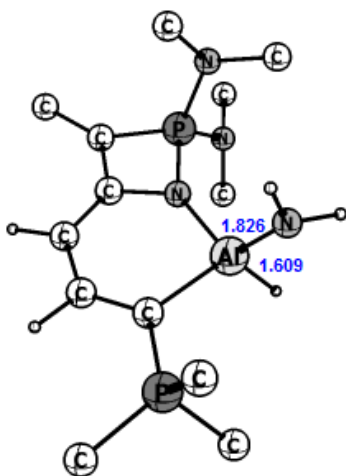

10AIP<sup>N-H</sup>

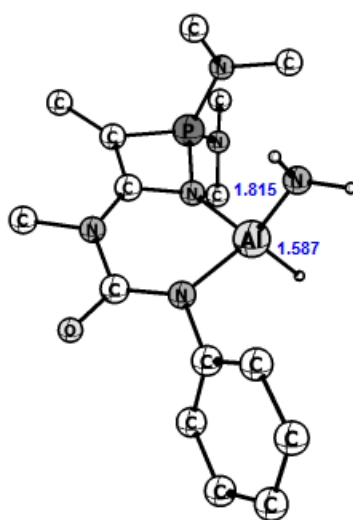

11AIP<sup>N-H</sup>

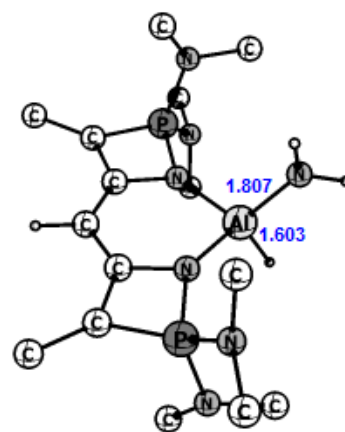

13AIP<sup>N-H</sup>

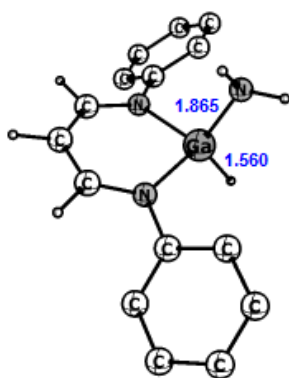

1GaP<sup>N-H</sup>

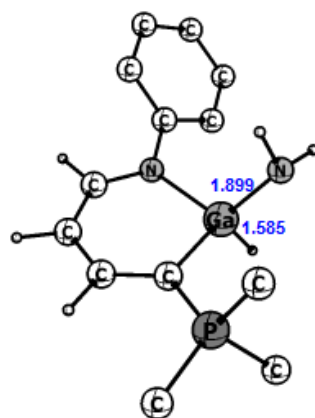

4GaP<sup>N-H</sup>

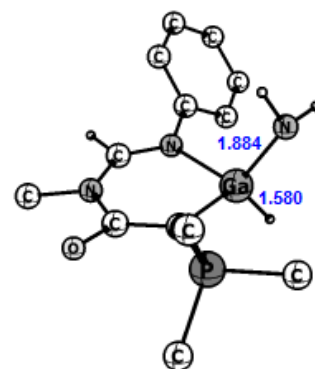

6GaP<sup>N-H</sup>

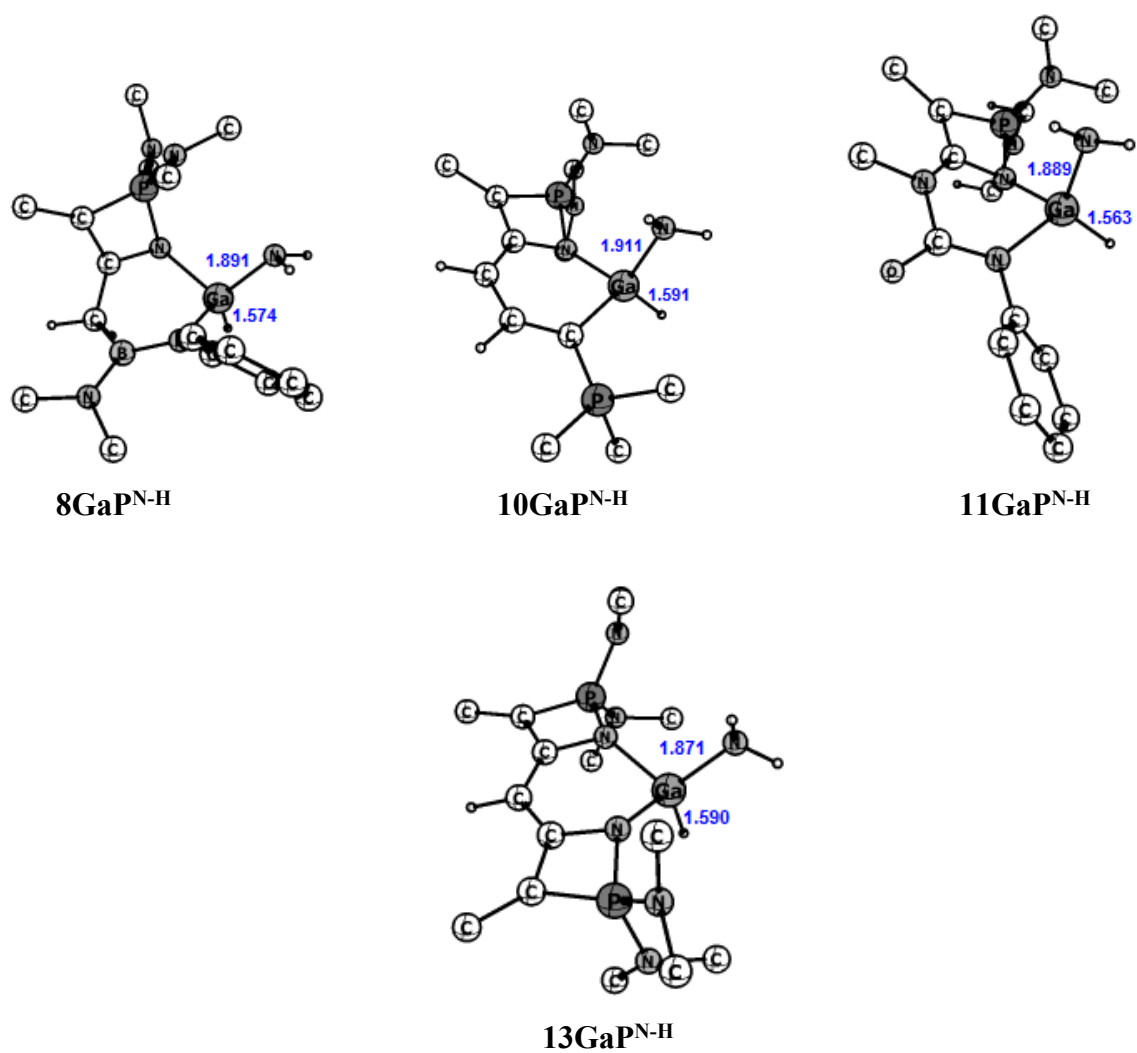

**Fig. S9** Optimized geometries (at **M06-D3/Def2-TZVP** level theory) of the N-H splitting products attained for the reactions of ammonia with some of the representative Al(I) and Ga(I) carbenoids. The hydrogen atoms of the phenyl and methyl groups are omitted for clarity.

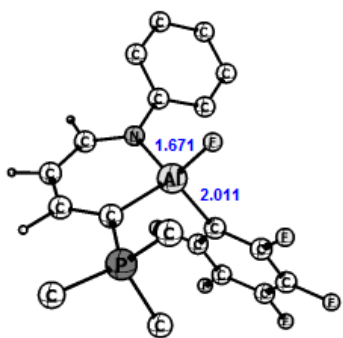

4AIPC-F

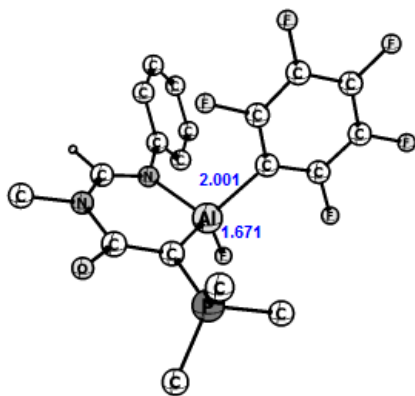

6AIPC-F

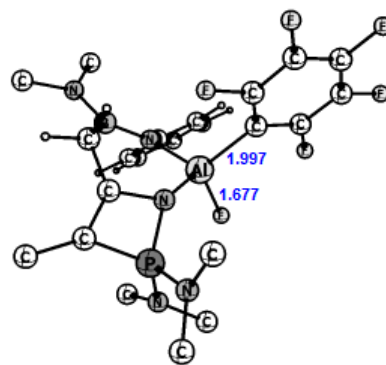

8AIPC-F

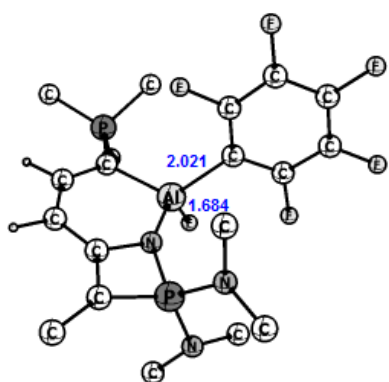

10AIPC-F

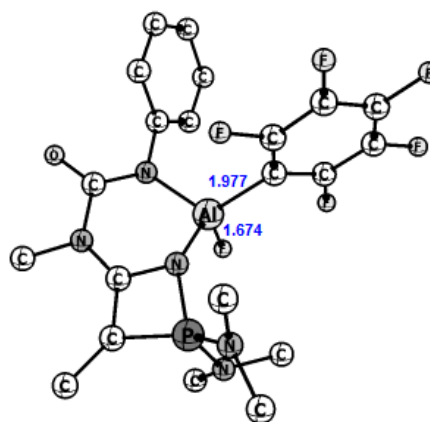

11AIPC-F

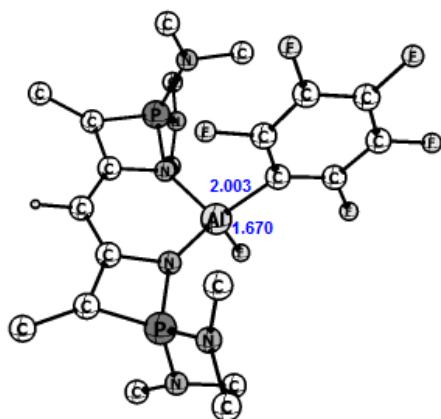

13AIPC-F

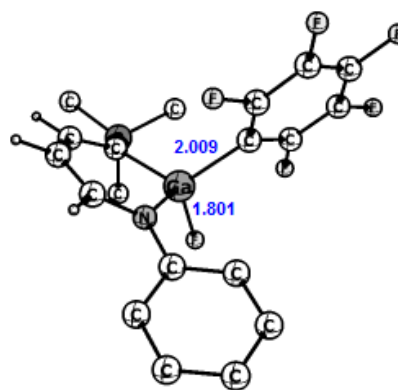

4GaPC-F

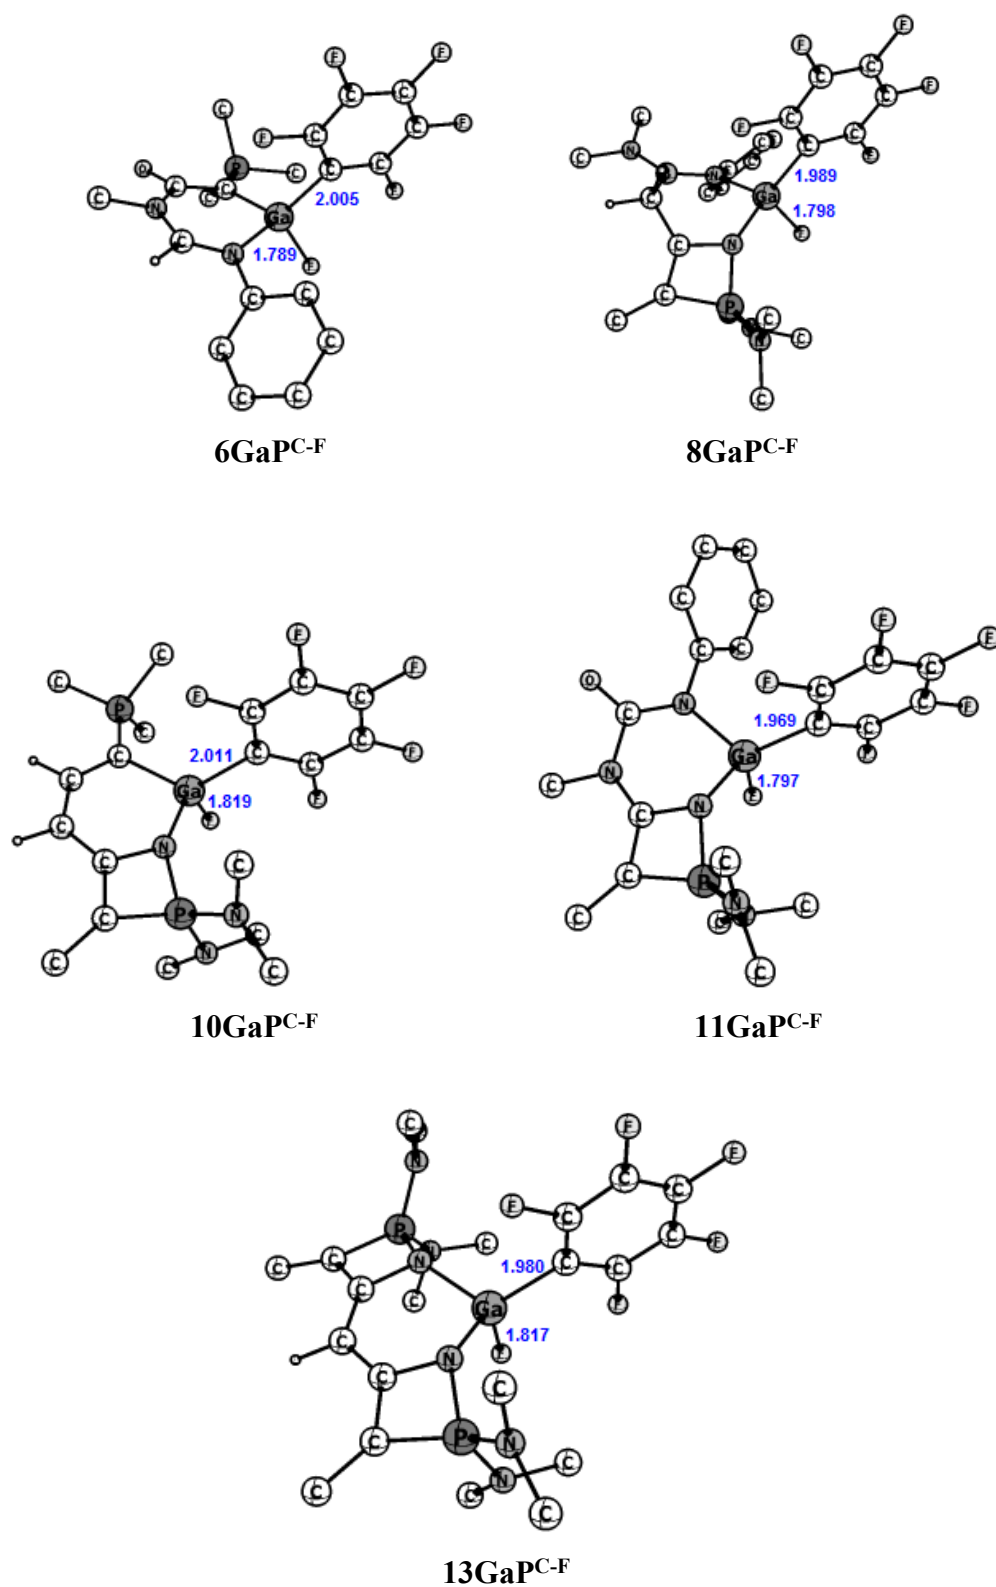

**Fig. S10** Optimized geometries (at M06-D3/Def2-TZVP level theory) of the C-F splitting products attained for the reactions of hexafluorobenzene with some of the representative Al(I) and Ga(I) carbenoids. The hydrogen atoms of the phenyl and methyl groups are omitted for clarity.



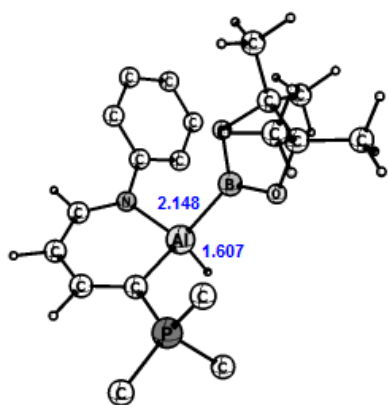

**4AIPB-H**

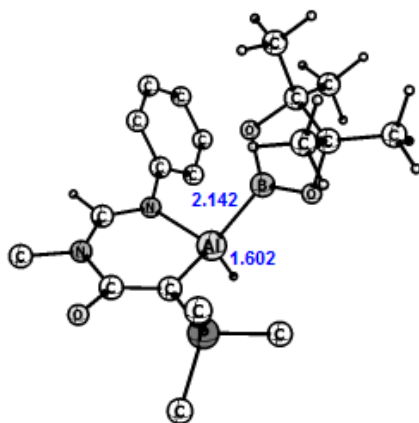

**6AIPB-H**

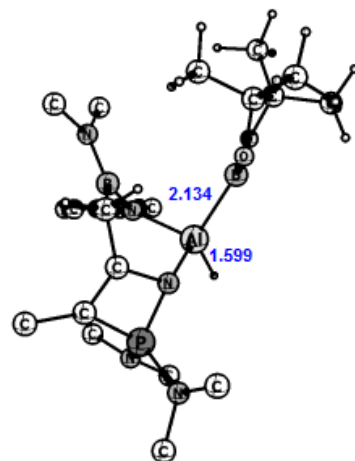

**8AIPB-H**

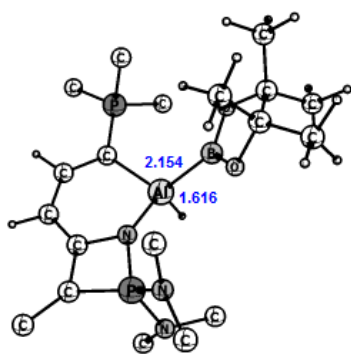

**10AIPB-H**

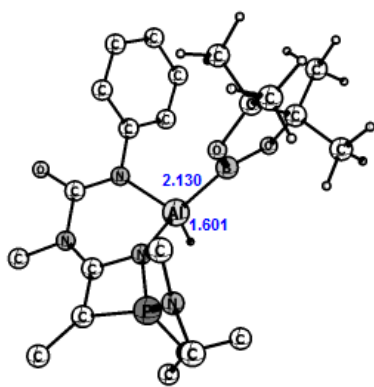

**11AIPB-H**

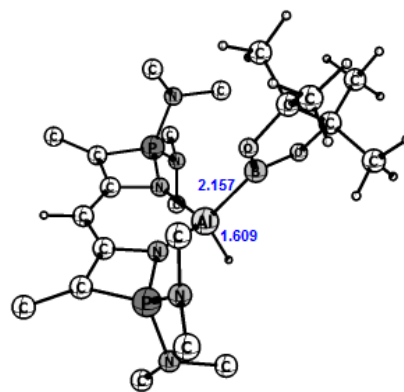

**13AIPB-H**

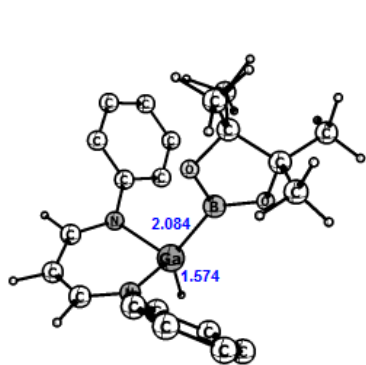

**1GaPB-H**

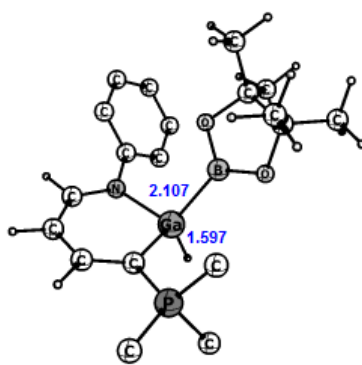

**4GaPB-H**

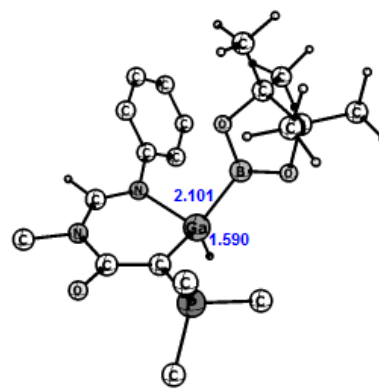

**6GaPB-H**

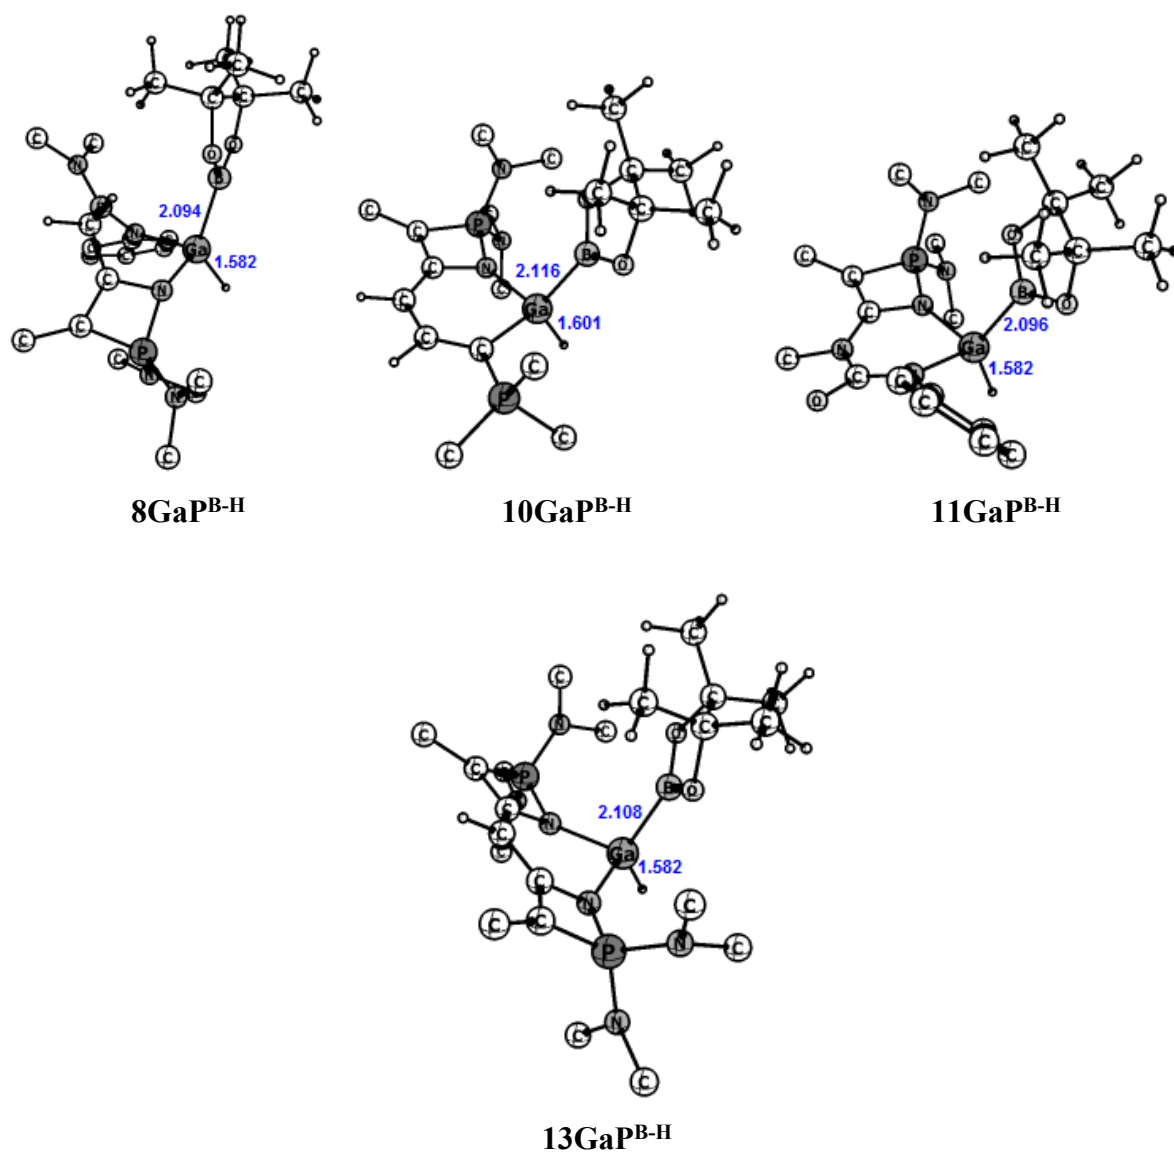

**Fig. S11** Optimized geometries (at M06-D3/Def2-TZVP level theory) of the B–H splitting products attained for the reactions of pinacolborane with some of the representative Al(I) and Ga(I) carbenoids. The hydrogen atoms of the phenyl and methyl groups are omitted for clarity.

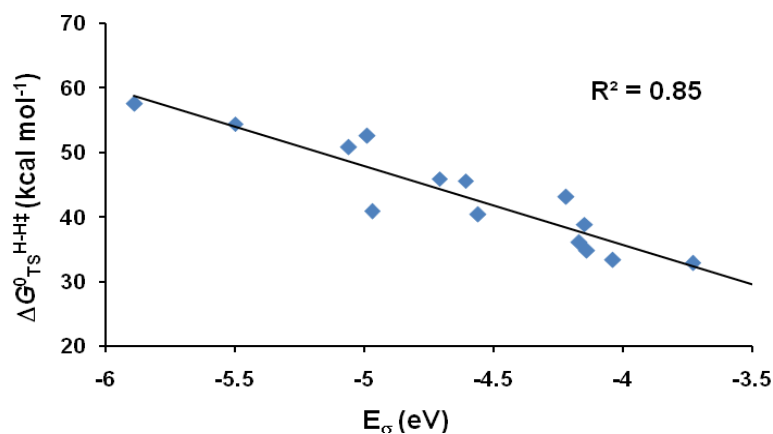

(a) Correlation plot between  $E_\sigma$  values and  $\Delta G_{TS}^{0, H-H^\ddagger}$  values obtained for Al/Ga carbenoids.

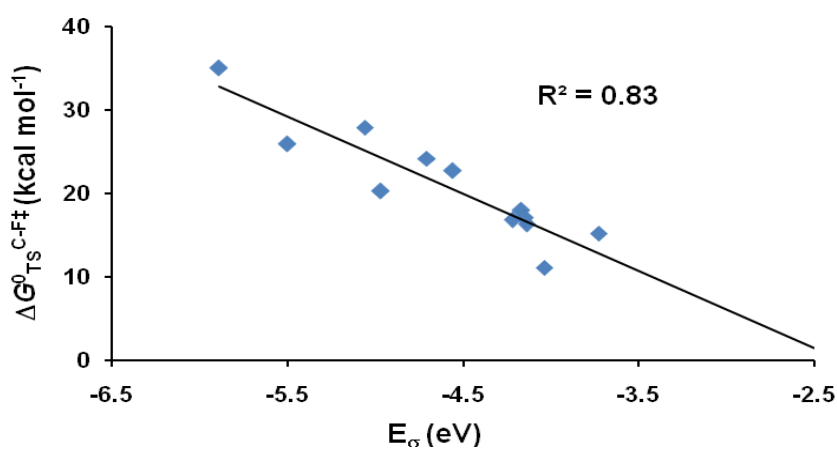

(b) Correlation plot between  $E_\sigma$  values and  $\Delta G_{TS}^{0, C-F^\ddagger}$  values obtained for Al/Ga carbenoids.

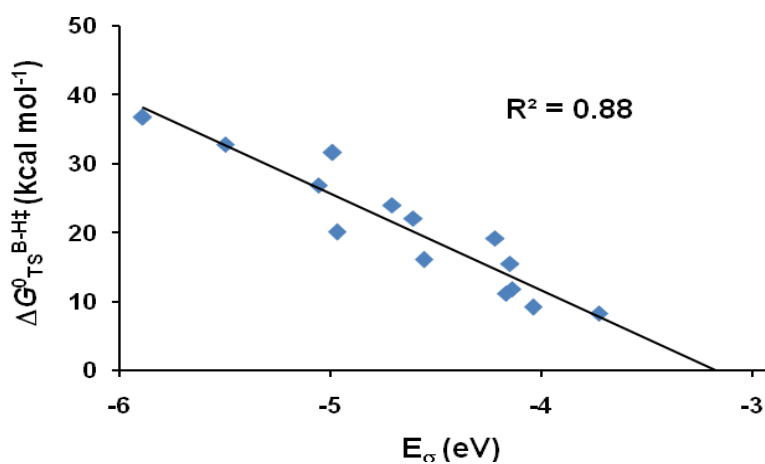

(c) Correlation plot between  $E_\sigma$  values and  $\Delta G_{TS}^{0, B-H^\ddagger}$  values obtained for Al/Ga carbenoids.

**Fig. S12** Correlation plots between  $E_\sigma$  values and  $\Delta G_{TS}^{0, X-Y^\ddagger}$  values obtained for Al/Ga carbenoids (where, X = B, C, H and Y = H, F) for activation of  $H_2$ ,  $C_6F_6$  and H-BPin.

Cartesian coordinates of Al(I) carbenoids (**1Al-13Al**) and Ga(I) carbenoids (**1Ga-13Ga**) in their optimized singlet (S) and triplet (T) states and also their total energies (in hartrees) including the zero point vibrational correction that have been calculated at **M06-D3/Def2-TZVP** level of theory.

**1Al-S** (T.E = -930.860673)

|    |              |              |              |
|----|--------------|--------------|--------------|
| 7  | 1.405380000  | 0.449777000  | -0.240373000 |
| 6  | 1.222861000  | 1.704534000  | -0.603896000 |
| 6  | 0.000073000  | 2.327014000  | -0.789412000 |
| 7  | -1.405381000 | 0.449957000  | -0.240238000 |
| 1  | 0.000161000  | 3.355712000  | -1.120609000 |
| 1  | 2.116270000  | 2.303937000  | -0.794826000 |
| 6  | 2.741688000  | 0.023199000  | -0.040966000 |
| 6  | 3.155885000  | -1.193303000 | -0.572987000 |
| 6  | 3.638014000  | 0.774148000  | 0.712979000  |
| 6  | 4.449209000  | -1.638677000 | -0.368793000 |
| 1  | 2.457476000  | -1.778008000 | -1.161286000 |
| 6  | 4.931915000  | 0.326469000  | 0.908413000  |
| 1  | 3.304935000  | 1.699950000  | 1.169624000  |
| 6  | 5.343236000  | -0.880482000 | 0.368245000  |
| 1  | 4.760976000  | -2.585098000 | -0.794770000 |
| 1  | 5.619262000  | 0.919623000  | 1.500469000  |
| 1  | 6.355412000  | -1.232391000 | 0.527570000  |
| 6  | -2.741700000 | 0.023356000  | -0.040837000 |
| 6  | -3.156065000 | -1.192678000 | -0.573781000 |
| 6  | -3.637839000 | 0.773740000  | 0.713864000  |
| 6  | -4.449382000 | -1.638138000 | -0.369771000 |
| 1  | -2.457756000 | -1.776969000 | -1.162619000 |
| 6  | -4.931746000 | 0.325989000  | 0.909126000  |
| 1  | -3.304647000 | 1.699150000  | 1.171230000  |
| 6  | -5.343250000 | -0.880480000 | 0.368022000  |
| 1  | -4.761249000 | -2.584203000 | -0.796465000 |
| 1  | -5.618948000 | 0.918717000  | 1.501775000  |
| 1  | -6.355436000 | -1.232424000 | 0.527197000  |
| 6  | -1.222760000 | 1.704849000  | -0.603234000 |
| 1  | -2.116120000 | 2.304633000  | -0.793249000 |
| 13 | -0.000088000 | -0.897538000 | 0.268339000  |

**1Al-T** (T.E = -930.816029)

|   |              |             |              |
|---|--------------|-------------|--------------|
| 7 | 1.447836000  | 0.506075000 | -0.304398000 |
| 6 | 1.244391000  | 1.877415000 | -0.440456000 |
| 6 | 0.000000000  | 2.470866000 | -0.515400000 |
| 7 | -1.447836000 | 0.506074000 | -0.304399000 |
| 1 | 0.000000000  | 3.542303000 | -0.676675000 |
| 1 | 2.133587000  | 2.484857000 | -0.565853000 |

|    |              |              |              |
|----|--------------|--------------|--------------|
| 6  | 2.734221000  | 0.013554000  | -0.058394000 |
| 6  | 3.059197000  | -1.286448000 | -0.455253000 |
| 6  | 3.710738000  | 0.764033000  | 0.598650000  |
| 6  | 4.302239000  | -1.824120000 | -0.186199000 |
| 1  | 2.328591000  | -1.866907000 | -1.014831000 |
| 6  | 4.959213000  | 0.224164000  | 0.848103000  |
| 1  | 3.475496000  | 1.762917000  | 0.945571000  |
| 6  | 5.266465000  | -1.070357000 | 0.463942000  |
| 1  | 4.525957000  | -2.834979000 | -0.507358000 |
| 1  | 5.699315000  | 0.824138000  | 1.365817000  |
| 1  | 6.246258000  | -1.486004000 | 0.664182000  |
| 6  | -2.734221000 | 0.013554000  | -0.058394000 |
| 6  | -3.059197000 | -1.286447000 | -0.455254000 |
| 6  | -3.710738000 | 0.764033000  | 0.598651000  |
| 6  | -4.302240000 | -1.824120000 | -0.186199000 |
| 1  | -2.328591000 | -1.866907000 | -1.014832000 |
| 6  | -4.959213000 | 0.224164000  | 0.848104000  |
| 1  | -3.475495000 | 1.762917000  | 0.945572000  |
| 6  | -5.266465000 | -1.070356000 | 0.463942000  |
| 1  | -4.525958000 | -2.834979000 | -0.507358000 |
| 1  | -5.699314000 | 0.824138000  | 1.365818000  |
| 1  | -6.246258000 | -1.486004000 | 0.664183000  |
| 6  | -1.244391000 | 1.877415000  | -0.440457000 |
| 1  | -2.133587000 | 2.484856000  | -0.565857000 |
| 13 | 0.000000000  | -0.584576000 | -0.229932000 |

**2AI-S (T.E = -1052.125003)**

|   |              |              |              |
|---|--------------|--------------|--------------|
| 7 | 1.789469000  | 0.424458000  | 0.465922000  |
| 6 | 1.544922000  | 1.674932000  | 0.452996000  |
| 6 | 0.239836000  | 2.229833000  | 0.858310000  |
| 7 | -1.031328000 | 0.034092000  | 0.397259000  |
| 1 | 0.242527000  | 3.302950000  | 0.680230000  |
| 1 | 2.324566000  | 2.365965000  | 0.109392000  |
| 6 | 3.056439000  | -0.069112000 | 0.087426000  |
| 6 | 3.099635000  | -1.186148000 | -0.737799000 |
| 6 | 4.237819000  | 0.499036000  | 0.544894000  |
| 6 | 4.317800000  | -1.705752000 | -1.131990000 |
| 1 | 2.168313000  | -1.627327000 | -1.078176000 |
| 6 | 5.454214000  | -0.029728000 | 0.150472000  |
| 1 | 4.198338000  | 1.337149000  | 1.232084000  |
| 6 | 5.497777000  | -1.128235000 | -0.690925000 |
| 1 | 4.346248000  | -2.570233000 | -1.784524000 |
| 1 | 6.374049000  | 0.413431000  | 0.513609000  |
| 1 | 6.451763000  | -1.542909000 | -0.993593000 |
| 6 | -2.183271000 | -0.750039000 | 0.232564000  |
| 6 | -2.125946000 | -1.945345000 | -0.486236000 |
| 6 | -3.396457000 | -0.410945000 | 0.836731000  |
| 6 | -3.241021000 | -2.757077000 | -0.615794000 |

|    |              |              |              |
|----|--------------|--------------|--------------|
| 1  | -1.191973000 | -2.214831000 | -0.971256000 |
| 6  | -4.510016000 | -1.215840000 | 0.696199000  |
| 1  | -3.447944000 | 0.502109000  | 1.421355000  |
| 6  | -4.441649000 | -2.394462000 | -0.032740000 |
| 1  | -3.168591000 | -3.677901000 | -1.183665000 |
| 1  | -5.441205000 | -0.926640000 | 1.170965000  |
| 1  | -5.315783000 | -3.025845000 | -0.137272000 |
| 5  | -0.987821000 | 1.434752000  | 0.156948000  |
| 7  | -1.886298000 | 2.168634000  | -0.670732000 |
| 6  | -2.775541000 | 1.563022000  | -1.637208000 |
| 1  | -2.529036000 | 0.517569000  | -1.806145000 |
| 1  | -3.826573000 | 1.617544000  | -1.324488000 |
| 1  | -2.688426000 | 2.090813000  | -2.594712000 |
| 6  | -2.046018000 | 3.601754000  | -0.666616000 |
| 1  | -3.100283000 | 3.866973000  | -0.515586000 |
| 1  | -1.478910000 | 4.075128000  | 0.131812000  |
| 1  | -1.737448000 | 4.048003000  | -1.621637000 |
| 13 | 0.319541000  | -0.927710000 | 1.347295000  |
| 1  | 0.131399000  | 2.088873000  | 1.943198000  |

**2Al-T (T.E = -1052.090789)**

|   |              |              |              |
|---|--------------|--------------|--------------|
| 7 | -1.808961000 | 0.269477000  | -0.285931000 |
| 6 | -1.503554000 | 1.606122000  | -0.348319000 |
| 6 | -0.222891000 | 2.051185000  | -0.951308000 |
| 7 | 1.118621000  | -0.036882000 | -0.257757000 |
| 1 | -0.211065000 | 3.140610000  | -0.964816000 |
| 1 | -2.160023000 | 2.300761000  | 0.166987000  |
| 6 | -3.132067000 | -0.135311000 | -0.064903000 |
| 6 | -3.388399000 | -1.371120000 | 0.531313000  |
| 6 | -4.217881000 | 0.657435000  | -0.436262000 |
| 6 | -4.682450000 | -1.808727000 | 0.730275000  |
| 1 | -2.550739000 | -1.981437000 | 0.864410000  |
| 6 | -5.511715000 | 0.222019000  | -0.215026000 |
| 1 | -4.035137000 | 1.605590000  | -0.928656000 |
| 6 | -5.756225000 | -1.011511000 | 0.364635000  |
| 1 | -4.853969000 | -2.773726000 | 1.193328000  |
| 1 | -6.341368000 | 0.852768000  | -0.514408000 |
| 1 | -6.771872000 | -1.348088000 | 0.533295000  |
| 6 | 2.304157000  | -0.782901000 | -0.201617000 |
| 6 | 2.354329000  | -1.992811000 | 0.492268000  |
| 6 | 3.454636000  | -0.369453000 | -0.875719000 |
| 6 | 3.504793000  | -2.762520000 | 0.507501000  |
| 1 | 1.477534000  | -2.313355000 | 1.050855000  |
| 6 | 4.606642000  | -1.131362000 | -0.844017000 |
| 1 | 3.427939000  | 0.562571000  | -1.430603000 |
| 6 | 4.641162000  | -2.334902000 | -0.156126000 |
| 1 | 3.513540000  | -3.698376000 | 1.054678000  |
| 1 | 5.486869000  | -0.786360000 | -1.375052000 |

|    |              |              |              |
|----|--------------|--------------|--------------|
| 1  | 5.544740000  | -2.931969000 | -0.138944000 |
| 5  | 1.031764000  | 1.412177000  | -0.185430000 |
| 7  | 1.932780000  | 2.198673000  | 0.572628000  |
| 6  | 2.839814000  | 1.669499000  | 1.566125000  |
| 1  | 2.619788000  | 0.628399000  | 1.791445000  |
| 1  | 3.887022000  | 1.734012000  | 1.243232000  |
| 1  | 2.744359000  | 2.244220000  | 2.494830000  |
| 6  | 2.046123000  | 3.634226000  | 0.483178000  |
| 1  | 3.084959000  | 3.923912000  | 0.281371000  |
| 1  | 1.430232000  | 4.037268000  | -0.317106000 |
| 1  | 1.751842000  | 4.118463000  | 1.423041000  |
| 13 | -0.441077000 | -0.919398000 | -0.553107000 |
| 1  | -0.185408000 | 1.717929000  | -2.004912000 |

**3Al-S (T.E = -1221.556766)**

|    |              |              |              |
|----|--------------|--------------|--------------|
| 7  | 1.669504000  | 0.439520000  | -0.148929000 |
| 6  | 1.575320000  | 1.754021000  | -0.274712000 |
| 6  | 0.419438000  | 2.512227000  | -0.361409000 |
| 7  | -1.281461000 | 0.169278000  | -0.065365000 |
| 1  | 0.536196000  | 3.578864000  | -0.506840000 |
| 1  | 2.524721000  | 2.296698000  | -0.337671000 |
| 6  | 2.983971000  | -0.078248000 | -0.023713000 |
| 6  | 3.381437000  | -1.147034000 | -0.820864000 |
| 6  | 3.878024000  | 0.433916000  | 0.911613000  |
| 6  | 4.652322000  | -1.678236000 | -0.694922000 |
| 1  | 2.686976000  | -1.547720000 | -1.550714000 |
| 6  | 5.150648000  | -0.095747000 | 1.028340000  |
| 1  | 3.557818000  | 1.237919000  | 1.565801000  |
| 6  | 5.543498000  | -1.153748000 | 0.226091000  |
| 1  | 4.949130000  | -2.506818000 | -1.327323000 |
| 1  | 5.834954000  | 0.313151000  | 1.762910000  |
| 1  | 6.537977000  | -1.572526000 | 0.323296000  |
| 6  | -2.540227000 | -0.463757000 | 0.057587000  |
| 6  | -2.957695000 | -1.384235000 | -0.900801000 |
| 6  | -3.366001000 | -0.221253000 | 1.152795000  |
| 6  | -4.177384000 | -2.025628000 | -0.774333000 |
| 1  | -2.312124000 | -1.583826000 | -1.749162000 |
| 6  | -4.587260000 | -0.859712000 | 1.272203000  |
| 1  | -3.025502000 | 0.464171000  | 1.923234000  |
| 6  | -5.000504000 | -1.763626000 | 0.307734000  |
| 1  | -4.485786000 | -2.737964000 | -1.530973000 |
| 1  | -5.215477000 | -0.656173000 | 2.131894000  |
| 1  | -5.955012000 | -2.266956000 | 0.403414000  |
| 14 | -1.171355000 | 1.801644000  | -0.273851000 |
| 6  | -2.693923000 | 2.832722000  | -0.432788000 |
| 1  | -3.446935000 | 2.309156000  | -1.024341000 |
| 1  | -3.131434000 | 3.033423000  | 0.546904000  |
| 1  | -2.458165000 | 3.786410000  | -0.906050000 |

13 0.270411000 -1.046337000 0.120973000

**3AI-T (T.E = -1221.519050)**

|    |              |              |              |
|----|--------------|--------------|--------------|
| 7  | 1.678749000  | 0.463392000  | -0.207467000 |
| 6  | 1.559236000  | 1.833452000  | -0.368322000 |
| 6  | 0.407855000  | 2.521828000  | -0.491607000 |
| 7  | -1.332974000 | 0.246987000  | -0.100047000 |
| 1  | 0.529491000  | 3.590531000  | -0.649938000 |
| 1  | 2.511768000  | 2.360532000  | -0.417488000 |
| 6  | 2.957523000  | -0.098871000 | -0.029013000 |
| 6  | 3.222664000  | -1.361337000 | -0.559049000 |
| 6  | 3.963627000  | 0.540053000  | 0.694040000  |
| 6  | 4.446692000  | -1.973015000 | -0.360978000 |
| 1  | 2.461721000  | -1.850125000 | -1.162254000 |
| 6  | 5.193489000  | -0.067672000 | 0.869973000  |
| 1  | 3.769900000  | 1.506320000  | 1.145074000  |
| 6  | 5.443316000  | -1.327105000 | 0.350476000  |
| 1  | 4.627456000  | -2.954320000 | -0.784190000 |
| 1  | 5.961460000  | 0.445558000  | 1.437609000  |
| 1  | 6.406669000  | -1.799755000 | 0.497583000  |
| 6  | -2.522287000 | -0.501661000 | 0.022379000  |
| 6  | -2.693780000 | -1.681330000 | -0.702630000 |
| 6  | -3.543378000 | -0.108336000 | 0.887086000  |
| 6  | -3.837938000 | -2.446370000 | -0.560502000 |
| 1  | -1.920357000 | -1.980036000 | -1.405254000 |
| 6  | -4.692296000 | -0.867348000 | 1.015024000  |
| 1  | -3.414398000 | 0.791036000  | 1.477802000  |
| 6  | -4.846863000 | -2.041439000 | 0.295876000  |
| 1  | -3.944285000 | -3.360169000 | -1.133909000 |
| 1  | -5.470975000 | -0.542412000 | 1.695855000  |
| 1  | -5.746252000 | -2.635582000 | 0.403190000  |
| 14 | -1.311556000 | 1.910793000  | -0.653556000 |
| 6  | -2.501671000 | 3.051181000  | 0.249598000  |
| 1  | -3.545501000 | 2.817443000  | 0.040717000  |
| 1  | -2.339136000 | 3.013807000  | 1.330746000  |
| 1  | -2.311081000 | 4.072754000  | -0.087448000 |
| 13 | 0.232903000  | -0.617810000 | 0.080013000  |

**4AI-S (T.E = -1143.637336)**

|   |              |              |              |
|---|--------------|--------------|--------------|
| 7 | 1.203669000  | 0.444784000  | -0.193836000 |
| 6 | 0.954265000  | 1.737590000  | -0.410704000 |
| 6 | -0.275676000 | 2.349128000  | -0.478124000 |
| 6 | -1.500074000 | 1.688357000  | -0.308921000 |
| 6 | -1.650434000 | 0.341668000  | -0.078396000 |
| 6 | 2.567422000  | 0.086352000  | -0.072420000 |
| 6 | 3.049743000  | -1.038129000 | -0.736484000 |



|    |              |              |              |
|----|--------------|--------------|--------------|
| 6  | 3.440618000  | 0.814864000  | 0.731670000  |
| 6  | 4.374443000  | -1.413575000 | -0.608496000 |
| 1  | 2.371761000  | -1.608451000 | -1.361686000 |
| 6  | 4.766510000  | 0.438958000  | 0.850937000  |
| 1  | 3.063241000  | 1.666293000  | 1.287711000  |
| 6  | 5.241031000  | -0.676369000 | 0.181521000  |
| 1  | 4.733592000  | -2.288638000 | -1.138038000 |
| 1  | 5.430393000  | 1.015767000  | 1.485038000  |
| 1  | 6.278557000  | -0.972970000 | 0.279743000  |
| 1  | 1.825059000  | 2.377329000  | -0.570348000 |
| 15 | -3.226960000 | -0.305096000 | 0.098392000  |
| 6  | -4.606802000 | 0.851569000  | -0.058513000 |
| 1  | -5.549461000 | 0.315759000  | 0.066403000  |
| 1  | -4.535144000 | 1.627589000  | 0.704534000  |
| 1  | -4.592142000 | 1.322019000  | -1.042392000 |
| 6  | -3.547477000 | -1.605316000 | -1.106634000 |
| 1  | -3.509022000 | -1.184467000 | -2.111975000 |
| 1  | -2.757917000 | -2.355850000 | -1.014805000 |
| 1  | -4.520395000 | -2.070567000 | -0.935727000 |
| 6  | -3.451121000 | -1.109580000 | 1.694833000  |
| 1  | -3.346148000 | -0.371160000 | 2.490480000  |
| 1  | -4.430108000 | -1.588997000 | 1.760059000  |
| 1  | -2.663474000 | -1.858494000 | 1.812170000  |
| 1  | -2.374710000 | 2.345503000  | -0.378293000 |
| 1  | -0.282995000 | 3.412559000  | -0.681628000 |
| 13 | -0.102852000 | -1.008722000 | 0.125240000  |

**4Al-T (T.E = -1143.598381)**

|    |              |              |              |
|----|--------------|--------------|--------------|
| 7  | 1.277489000  | 0.475587000  | -0.264521000 |
| 6  | 0.966349000  | 1.831748000  | -0.351571000 |
| 6  | -0.303688000 | 2.365052000  | -0.332603000 |
| 6  | -1.523730000 | 1.706996000  | -0.198384000 |
| 6  | -1.684647000 | 0.278166000  | -0.062643000 |
| 6  | 2.605938000  | 0.087828000  | -0.101244000 |
| 6  | 3.006643000  | -1.188718000 | -0.515334000 |
| 6  | 3.572048000  | 0.911197000  | 0.486983000  |
| 6  | 4.302273000  | -1.627729000 | -0.333971000 |
| 1  | 2.284059000  | -1.830279000 | -1.014410000 |
| 6  | 4.871643000  | 0.467927000  | 0.651397000  |
| 1  | 3.289815000  | 1.891779000  | 0.850249000  |
| 6  | 5.251670000  | -0.801282000 | 0.248215000  |
| 1  | 4.578401000  | -2.621237000 | -0.669621000 |
| 1  | 5.597186000  | 1.125989000  | 1.117437000  |
| 1  | 6.271661000  | -1.140628000 | 0.381007000  |
| 1  | 1.805843000  | 2.500297000  | -0.512679000 |
| 15 | -3.227589000 | -0.374451000 | 0.112739000  |
| 6  | -4.145005000 | 0.232995000  | 1.554653000  |
| 1  | -5.160939000 | -0.166117000 | 1.585617000  |

|    |              |              |              |
|----|--------------|--------------|--------------|
| 1  | -3.608211000 | -0.048358000 | 2.461255000  |
| 1  | -4.189151000 | 1.322614000  | 1.508335000  |
| 6  | -4.366961000 | -0.025898000 | -1.255535000 |
| 1  | -4.420708000 | 1.054506000  | -1.401260000 |
| 1  | -3.972397000 | -0.474072000 | -2.168121000 |
| 1  | -5.369285000 | -0.410903000 | -1.056386000 |
| 6  | -3.216633000 | -2.166584000 | 0.274577000  |
| 1  | -2.626300000 | -2.457202000 | 1.144585000  |
| 1  | -4.238851000 | -2.529697000 | 0.395250000  |
| 1  | -2.777170000 | -2.618089000 | -0.615747000 |
| 1  | -2.412897000 | 2.340587000  | -0.212688000 |
| 1  | -0.343957000 | 3.442994000  | -0.452015000 |
| 13 | -0.096238000 | -0.732671000 | -0.120577000 |

**5A1-S (T.E = -1061.439221)**

|    |              |              |              |
|----|--------------|--------------|--------------|
| 7  | 1.476485000  | 0.148275000  | -0.103583000 |
| 6  | 1.283430000  | 1.416813000  | -0.251819000 |
| 7  | -1.271191000 | 0.151584000  | -0.073387000 |
| 1  | 2.152079000  | 2.075058000  | -0.345600000 |
| 6  | 2.824406000  | -0.281779000 | 0.012327000  |
| 6  | 3.258595000  | -1.354289000 | -0.756523000 |
| 6  | 3.699284000  | 0.319166000  | 0.908918000  |
| 6  | 4.562927000  | -1.799548000 | -0.646373000 |
| 1  | 2.567232000  | -1.826891000 | -1.445019000 |
| 6  | 5.004763000  | -0.128595000 | 1.010532000  |
| 1  | 3.343993000  | 1.120235000  | 1.548650000  |
| 6  | 5.441022000  | -1.186854000 | 0.232392000  |
| 1  | 4.895439000  | -2.632381000 | -1.254507000 |
| 1  | 5.679414000  | 0.344346000  | 1.714471000  |
| 1  | 6.461253000  | -1.540848000 | 0.318017000  |
| 6  | -2.602892000 | -0.360158000 | 0.032975000  |
| 6  | -3.080079000 | -1.224746000 | -0.940615000 |
| 6  | -3.398632000 | -0.065918000 | 1.132446000  |
| 6  | -4.340881000 | -1.786902000 | -0.819581000 |
| 1  | -2.455420000 | -1.448399000 | -1.798898000 |
| 6  | -4.657182000 | -0.623065000 | 1.248063000  |
| 1  | -3.020487000 | 0.608742000  | 1.892012000  |
| 6  | -5.133184000 | -1.486271000 | 0.272741000  |
| 1  | -4.702437000 | -2.462008000 | -1.586447000 |
| 1  | -5.271558000 | -0.385145000 | 2.108763000  |
| 1  | -6.119532000 | -1.924716000 | 0.368046000  |
| 6  | -1.216284000 | 1.487151000  | -0.215428000 |
| 13 | 0.017915000  | -1.291768000 | 0.134841000  |
| 8  | -2.129730000 | 2.275784000  | -0.281127000 |
| 7  | 0.116497000  | 2.057512000  | -0.319317000 |
| 6  | 0.127710000  | 3.500617000  | -0.523625000 |
| 1  | -0.404246000 | 3.757904000  | -1.438215000 |
| 1  | -0.370350000 | 4.004020000  | 0.303385000  |

1 1.159011000 3.841459000 -0.593135000

**5AI-T** (T.E = -1061.382420)

7 1.492440000 0.175630000 -0.146204000  
6 1.311942000 1.528564000 -0.273532000  
7 -1.323671000 0.221931000 -0.084926000  
1 2.108267000 2.114281000 -0.718115000  
6 2.806866000 -0.302594000 -0.008138000  
6 3.099830000 -1.611131000 -0.395650000  
6 3.834920000 0.481960000 0.512115000  
6 4.369573000 -2.128854000 -0.240632000  
1 2.318826000 -2.215562000 -0.853436000  
6 5.109763000 -0.039239000 0.647668000  
1 3.618422000 1.490952000 0.843059000  
6 5.388129000 -1.343534000 0.278600000  
1 4.570356000 -3.148885000 -0.547128000  
1 5.894469000 0.585165000 1.059932000  
1 6.388569000 -1.744013000 0.386650000  
6 -2.610278000 -0.365119000 0.003529000  
6 -2.845892000 -1.532279000 -0.718871000  
6 -3.611244000 0.115160000 0.844383000  
6 -4.041915000 -2.219624000 -0.594287000  
1 -2.089046000 -1.881711000 -1.418015000  
6 -4.808214000 -0.565629000 0.951492000  
1 -3.444361000 1.024664000 1.404430000  
6 -5.031103000 -1.735993000 0.240645000  
1 -4.201998000 -3.125527000 -1.167130000  
1 -5.578628000 -0.179125000 1.608969000  
1 -5.973128000 -2.262551000 0.335479000  
6 -1.220505000 1.605246000 -0.182157000  
13 0.074904000 -0.922100000 0.079095000  
8 -2.178914000 2.347710000 -0.204275000  
7 0.059962000 2.140377000 -0.260623000  
6 0.079172000 3.593161000 -0.356944000  
1 -0.460186000 3.931962000 -1.241598000  
1 -0.394680000 4.043746000 0.515529000  
1 1.113297000 3.926067000 -0.409722000

**6AI-S** (T.E = -1274.218691)

6 -1.467983000 1.217407000 -0.101948000  
6 -1.438935000 -0.184831000 -0.013029000  
6 1.025247000 1.383795000 -0.206962000  
1 1.828527000 2.121857000 -0.290235000  
13 0.075159000 -1.485351000 -0.008489000  
7 1.350190000 0.132441000 -0.118962000  
15 -3.049368000 -0.765324000 0.110140000

|   |              |              |              |
|---|--------------|--------------|--------------|
| 6 | -3.970230000 | -0.210004000 | 1.562853000  |
| 1 | -4.022483000 | 0.877715000  | 1.548826000  |
| 1 | -4.977475000 | -0.632015000 | 1.563483000  |
| 1 | -3.440914000 | -0.534664000 | 2.459743000  |
| 6 | -4.120754000 | -0.386128000 | -1.295127000 |
| 1 | -3.688132000 | -0.824673000 | -2.195400000 |
| 1 | -5.120754000 | -0.795357000 | -1.136854000 |
| 1 | -4.175190000 | 0.695385000  | -1.410988000 |
| 6 | -3.095662000 | -2.562451000 | 0.223357000  |
| 1 | -2.545765000 | -2.903006000 | 1.101646000  |
| 1 | -4.135891000 | -2.887267000 | 0.295184000  |
| 1 | -2.633460000 | -3.011025000 | -0.657029000 |
| 8 | -2.447238000 | 1.967340000  | -0.098152000 |
| 7 | -0.193224000 | 1.921124000  | -0.223552000 |
| 6 | -0.303825000 | 3.365470000  | -0.364337000 |
| 1 | -0.879863000 | 3.617912000  | -1.253776000 |
| 1 | -0.820965000 | 3.792050000  | 0.493997000  |
| 1 | 0.693250000  | 3.795853000  | -0.442756000 |
| 6 | 2.740883000  | -0.138273000 | -0.028517000 |
| 6 | 3.301381000  | -1.109186000 | -0.849848000 |
| 6 | 3.543893000  | 0.521217000  | 0.894517000  |
| 6 | 4.651528000  | -1.393009000 | -0.763911000 |
| 1 | 2.665141000  | -1.633984000 | -1.553370000 |
| 6 | 4.895863000  | 0.234347000  | 0.973815000  |
| 1 | 3.096791000  | 1.240006000  | 1.573210000  |
| 6 | 5.454765000  | -0.721293000 | 0.143807000  |
| 1 | 5.079980000  | -2.147096000 | -1.413740000 |
| 1 | 5.511159000  | 0.752051000  | 1.700545000  |
| 1 | 6.511621000  | -0.950377000 | 0.210571000  |

**6Al-T** (T.E = -1274.172866)

|    |              |              |              |
|----|--------------|--------------|--------------|
| 6  | -1.479424000 | 1.255510000  | -0.101103000 |
| 6  | -1.476699000 | -0.188078000 | -0.009823000 |
| 6  | 1.030997000  | 1.495747000  | -0.119216000 |
| 1  | 1.767984000  | 2.236278000  | -0.411276000 |
| 13 | 0.135913000  | -1.151290000 | -0.082056000 |
| 7  | 1.392848000  | 0.171530000  | -0.183337000 |
| 15 | -3.051779000 | -0.819414000 | 0.110558000  |
| 6  | -3.999450000 | -0.309832000 | 1.560631000  |
| 1  | -4.099279000 | 0.774478000  | 1.542010000  |
| 1  | -4.986607000 | -0.776976000 | 1.558286000  |
| 1  | -3.458248000 | -0.605445000 | 2.460313000  |
| 6  | -4.147610000 | -0.508003000 | -1.290990000 |
| 1  | -3.697095000 | -0.923928000 | -2.193140000 |
| 1  | -5.124373000 | -0.967766000 | -1.125637000 |
| 1  | -4.256242000 | 0.569240000  | -1.408561000 |
| 6  | -2.976222000 | -2.617445000 | 0.230485000  |
| 1  | -2.396278000 | -2.910193000 | 1.107235000  |

|   |              |              |              |
|---|--------------|--------------|--------------|
| 1 | -3.984976000 | -3.025024000 | 0.317414000  |
| 1 | -2.499747000 | -3.033200000 | -0.658838000 |
| 8 | -2.549460000 | 1.882173000  | -0.104554000 |
| 7 | -0.283849000 | 1.957369000  | -0.185761000 |
| 6 | -0.363915000 | 3.405184000  | -0.260302000 |
| 1 | -1.408813000 | 3.696589000  | -0.284554000 |
| 1 | 0.121389000  | 3.857195000  | 0.609376000  |
| 1 | 0.137964000  | 3.765159000  | -1.162692000 |
| 6 | 2.753678000  | -0.132640000 | -0.060767000 |
| 6 | 3.235718000  | -1.337095000 | -0.584477000 |
| 6 | 3.664208000  | 0.718037000  | 0.571665000  |
| 6 | 4.563269000  | -1.688897000 | -0.457627000 |
| 1 | 2.552019000  | -1.988259000 | -1.124281000 |
| 6 | 4.997038000  | 0.361807000  | 0.682497000  |
| 1 | 3.311104000  | 1.642820000  | 1.011997000  |
| 6 | 5.460028000  | -0.839476000 | 0.175453000  |
| 1 | 4.906240000  | -2.628705000 | -0.875511000 |
| 1 | 5.682357000  | 1.036069000  | 1.184583000  |
| 1 | 6.505416000  | -1.108955000 | 0.263196000  |

**7AI-S** (T.E = -1386.991787)

|    |              |              |              |
|----|--------------|--------------|--------------|
| 7  | 0.667446000  | 0.073181000  | 0.133932000  |
| 6  | 0.739990000  | -1.294075000 | 0.533462000  |
| 6  | -0.428595000 | -2.016342000 | 0.796091000  |
| 6  | -1.689679000 | -1.486993000 | 0.644696000  |
| 1  | -0.344246000 | -3.041965000 | 1.131102000  |
| 1  | -2.514694000 | -2.160592000 | 0.889660000  |
| 15 | 2.317751000  | 0.016652000  | 0.002116000  |
| 6  | 2.099605000  | -1.606700000 | 0.552915000  |
| 6  | 2.841394000  | -2.854434000 | 0.840900000  |
| 1  | 3.672157000  | -2.700889000 | 1.535201000  |
| 1  | 2.172725000  | -3.583678000 | 1.304931000  |
| 1  | 3.258466000  | -3.332309000 | -0.054203000 |
| 7  | 2.972681000  | 0.204060000  | -1.503884000 |
| 7  | 3.029645000  | 1.226876000  | 0.871385000  |
| 6  | 2.884166000  | 1.505186000  | -2.154932000 |
| 1  | 1.929899000  | 1.614757000  | -2.685883000 |
| 1  | 2.954806000  | 2.309984000  | -1.425287000 |
| 1  | 3.700767000  | 1.608336000  | -2.874808000 |
| 6  | 2.791578000  | -0.893069000 | -2.441090000 |
| 1  | 3.517623000  | -0.791793000 | -3.251313000 |
| 1  | 2.949932000  | -1.850421000 | -1.948061000 |
| 1  | 1.783667000  | -0.887556000 | -2.877539000 |
| 6  | 4.459937000  | 1.461288000  | 0.814621000  |
| 1  | 4.658817000  | 2.535019000  | 0.886762000  |
| 1  | 4.978386000  | 0.965079000  | 1.644448000  |
| 1  | 4.876471000  | 1.094645000  | -0.121879000 |
| 6  | 2.438232000  | 1.616347000  | 2.139777000  |

|    |              |              |              |
|----|--------------|--------------|--------------|
| 1  | 1.359142000  | 1.475312000  | 2.114934000  |
| 1  | 2.854467000  | 1.036057000  | 2.972343000  |
| 1  | 2.643175000  | 2.674897000  | 2.319799000  |
| 13 | -0.795216000 | 1.219679000  | -0.292949000 |
| 6  | -3.413943000 | -0.011726000 | 0.084489000  |
| 6  | -4.248820000 | -0.918802000 | -0.566002000 |
| 6  | -3.959205000 | 1.187997000  | 0.537062000  |
| 6  | -5.593725000 | -0.643227000 | -0.734141000 |
| 1  | -3.828320000 | -1.834860000 | -0.966770000 |
| 6  | -5.302034000 | 1.463313000  | 0.356213000  |
| 1  | -3.316045000 | 1.898323000  | 1.045040000  |
| 6  | -6.128788000 | 0.548501000  | -0.274571000 |
| 1  | -6.225690000 | -1.361289000 | -1.244677000 |
| 1  | -5.707260000 | 2.400357000  | 0.720816000  |
| 1  | -7.181220000 | 0.765565000  | -0.413008000 |
| 7  | -2.035795000 | -0.258714000 | 0.255431000  |

**7Al-T** (T.E = -1386.927288)

|    |              |              |              |
|----|--------------|--------------|--------------|
| 7  | 0.731171000  | -0.093771000 | -0.318163000 |
| 6  | 0.719506000  | 1.389729000  | -0.288139000 |
| 6  | -0.421777000 | 2.142067000  | -0.412882000 |
| 6  | -1.735413000 | 1.676152000  | -0.498277000 |
| 1  | -0.279658000 | 3.217227000  | -0.462309000 |
| 1  | -2.533659000 | 2.372197000  | -0.728600000 |
| 15 | 2.353493000  | -0.008056000 | -0.003917000 |
| 6  | 2.112128000  | 1.664686000  | -0.138916000 |
| 6  | 2.837743000  | 2.948012000  | -0.026408000 |
| 1  | 3.917759000  | 2.792188000  | 0.018110000  |
| 1  | 2.645395000  | 3.604412000  | -0.882416000 |
| 1  | 2.555682000  | 3.512739000  | 0.872846000  |
| 7  | 2.827823000  | -0.629436000 | 1.471945000  |
| 7  | 3.226006000  | -0.961122000 | -1.047429000 |
| 6  | 2.656030000  | -2.049131000 | 1.729511000  |
| 1  | 1.642978000  | -2.262106000 | 2.102538000  |
| 1  | 2.810712000  | -2.631817000 | 0.822420000  |
| 1  | 3.372813000  | -2.385055000 | 2.485135000  |
| 6  | 2.498431000  | 0.178497000  | 2.634016000  |
| 1  | 3.100563000  | -0.152465000 | 3.484037000  |
| 1  | 2.710489000  | 1.229137000  | 2.442083000  |
| 1  | 1.437169000  | 0.084509000  | 2.908040000  |
| 6  | 4.614743000  | -1.314566000 | -0.830712000 |
| 1  | 4.800666000  | -2.332415000 | -1.189716000 |
| 1  | 5.285802000  | -0.639397000 | -1.376619000 |
| 1  | 4.866608000  | -1.267090000 | 0.226693000  |
| 6  | 2.874982000  | -0.877525000 | -2.453723000 |
| 1  | 1.825548000  | -0.608520000 | -2.565923000 |
| 1  | 3.484206000  | -0.129502000 | -2.975732000 |
| 1  | 3.039790000  | -1.848759000 | -2.929325000 |

|    |              |              |              |
|----|--------------|--------------|--------------|
| 13 | -0.839081000 | -0.923017000 | 0.010113000  |
| 6  | -3.448529000 | 0.018532000  | -0.166931000 |
| 6  | -4.376774000 | 0.902023000  | 0.389536000  |
| 6  | -3.898137000 | -1.249144000 | -0.547993000 |
| 6  | -5.693131000 | 0.518654000  | 0.565891000  |
| 1  | -4.048042000 | 1.880841000  | 0.717675000  |
| 6  | -5.210297000 | -1.631941000 | -0.348584000 |
| 1  | -3.203200000 | -1.924761000 | -1.041931000 |
| 6  | -6.122522000 | -0.748416000 | 0.205640000  |
| 1  | -6.392748000 | 1.220715000  | 1.006331000  |
| 1  | -5.527832000 | -2.622929000 | -0.652982000 |
| 1  | -7.156128000 | -1.040303000 | 0.346209000  |
| 7  | -2.098022000 | 0.347965000  | -0.330847000 |

**8A1-S (T.E = -1508.266511)**

|    |              |              |              |
|----|--------------|--------------|--------------|
| 7  | 1.293164000  | 0.367239000  | -0.966191000 |
| 6  | 1.032385000  | 1.447974000  | -0.076330000 |
| 6  | -0.117336000 | 2.307647000  | -0.336229000 |
| 15 | 2.496020000  | -0.052632000 | 0.089411000  |
| 6  | 1.959121000  | 1.389148000  | 0.927652000  |
| 6  | 2.228950000  | 2.204655000  | 2.131069000  |
| 1  | 3.227767000  | 2.650582000  | 2.123089000  |
| 1  | 1.509531000  | 3.024557000  | 2.196238000  |
| 1  | 2.145647000  | 1.628470000  | 3.058708000  |
| 7  | 2.365798000  | -1.422692000 | 0.995035000  |
| 7  | 3.934602000  | -0.211689000 | -0.683912000 |
| 6  | 2.661465000  | -2.728753000 | 0.420135000  |
| 1  | 1.761017000  | -3.169644000 | -0.025738000 |
| 1  | 3.416333000  | -2.647152000 | -0.359646000 |
| 1  | 3.034532000  | -3.390407000 | 1.206858000  |
| 6  | 1.304302000  | -1.489745000 | 1.990259000  |
| 1  | 1.589563000  | -2.201002000 | 2.769207000  |
| 1  | 1.138843000  | -0.515224000 | 2.446565000  |
| 1  | 0.359994000  | -1.826375000 | 1.541016000  |
| 6  | 5.153684000  | -0.492394000 | 0.046515000  |
| 1  | 5.721805000  | -1.281149000 | -0.457866000 |
| 1  | 5.789399000  | 0.398420000  | 0.106634000  |
| 1  | 4.929588000  | -0.827863000 | 1.058863000  |
| 6  | 4.144630000  | 0.290596000  | -2.029140000 |
| 1  | 3.189573000  | 0.416122000  | -2.534921000 |
| 1  | 4.675274000  | 1.249625000  | -2.018683000 |
| 1  | 4.748281000  | -0.428797000 | -2.590559000 |
| 13 | -0.096691000 | -0.886504000 | -1.595416000 |
| 6  | -2.530397000 | -0.752729000 | -0.265260000 |
| 6  | -2.914515000 | -0.809883000 | 1.077788000  |
| 6  | -3.178038000 | -1.610043000 | -1.158742000 |
| 6  | -3.921515000 | -1.657076000 | 1.501253000  |
| 1  | -2.406350000 | -0.161921000 | 1.786532000  |

|   |              |              |              |
|---|--------------|--------------|--------------|
| 6 | -4.177575000 | -2.466005000 | -0.729765000 |
| 1 | -2.898075000 | -1.578861000 | -2.206677000 |
| 6 | -4.562465000 | -2.493174000 | 0.600118000  |
| 1 | -4.204303000 | -1.669368000 | 2.548478000  |
| 1 | -4.666793000 | -3.113784000 | -1.448972000 |
| 1 | -5.349252000 | -3.160071000 | 0.931994000  |
| 7 | -1.487640000 | 0.094728000  | -0.672050000 |
| 5 | -1.514396000 | 1.488486000  | -0.371798000 |
| 7 | -2.709289000 | 2.254123000  | -0.191443000 |
| 6 | -4.020363000 | 1.806840000  | -0.605505000 |
| 1 | -3.957255000 | 0.944372000  | -1.263966000 |
| 1 | -4.656430000 | 1.535418000  | 0.248132000  |
| 1 | -4.526949000 | 2.610901000  | -1.153158000 |
| 6 | -2.788186000 | 3.573059000  | 0.382533000  |
| 1 | -1.844546000 | 3.888930000  | 0.821540000  |
| 1 | -3.085067000 | 4.324960000  | -0.361885000 |
| 1 | -3.543064000 | 3.598570000  | 1.179584000  |
| 1 | -0.131774000 | 3.139790000  | 0.368169000  |
| 1 | 0.000056000  | 2.739829000  | -1.339497000 |

**8AI-T** (T.E = -1508.201836)

|    |              |              |              |
|----|--------------|--------------|--------------|
| 7  | 1.322789000  | 0.962660000  | -0.916494000 |
| 6  | 0.816703000  | 1.594379000  | 0.261625000  |
| 6  | -0.367363000 | 2.455847000  | 0.185662000  |
| 15 | 2.262553000  | 0.057417000  | 0.119039000  |
| 6  | 1.521324000  | 1.089019000  | 1.322482000  |
| 6  | 1.506062000  | 1.356381000  | 2.777417000  |
| 1  | 2.451728000  | 1.768594000  | 3.141455000  |
| 1  | 0.724848000  | 2.081463000  | 3.017778000  |
| 1  | 1.302811000  | 0.457032000  | 3.367206000  |
| 7  | 1.977436000  | -1.540072000 | 0.331529000  |
| 7  | 3.837732000  | 0.125866000  | -0.352112000 |
| 6  | 2.326074000  | -2.501732000 | -0.706742000 |
| 1  | 1.442624000  | -2.725755000 | -1.318569000 |
| 1  | 3.099076000  | -2.105775000 | -1.363963000 |
| 1  | 2.691512000  | -3.422272000 | -0.239437000 |
| 6  | 0.853952000  | -1.995023000 | 1.142783000  |
| 1  | 1.138128000  | -2.917248000 | 1.657304000  |
| 1  | 0.576285000  | -1.245732000 | 1.881440000  |
| 1  | -0.021379000 | -2.195524000 | 0.512601000  |
| 6  | 4.879505000  | -0.649297000 | 0.291015000  |
| 1  | 5.544710000  | -1.079268000 | -0.465163000 |
| 1  | 5.483759000  | -0.020044000 | 0.954819000  |
| 1  | 4.453406000  | -1.461552000 | 0.877096000  |
| 6  | 4.333826000  | 1.287206000  | -1.069024000 |
| 1  | 3.510051000  | 1.808171000  | -1.552473000 |
| 1  | 4.850639000  | 1.978987000  | -0.393555000 |
| 1  | 5.044215000  | 0.963848000  | -1.835377000 |



|    |              |              |              |
|----|--------------|--------------|--------------|
| 13 | -0.084976000 | 0.272355000  | -2.013644000 |
| 6  | -2.134897000 | -0.874284000 | -0.306261000 |
| 6  | -2.716352000 | -0.938925000 | 0.969497000  |
| 6  | -2.193150000 | -2.032940000 | -1.095868000 |
| 6  | -3.283633000 | -2.106729000 | 1.440360000  |
| 1  | -2.677761000 | -0.058051000 | 1.604623000  |
| 6  | -2.762978000 | -3.198896000 | -0.615810000 |
| 1  | -1.776374000 | -1.998156000 | -2.099115000 |
| 6  | -3.307720000 | -3.252660000 | 0.656555000  |
| 1  | -3.703216000 | -2.126215000 | 2.440648000  |
| 1  | -2.787515000 | -4.076751000 | -1.252754000 |
| 1  | -3.755282000 | -4.166426000 | 1.028130000  |
| 7  | -1.453755000 | 0.244222000  | -0.730600000 |
| 5  | -1.670691000 | 1.597205000  | -0.259543000 |
| 7  | -2.944649000 | 2.205635000  | -0.186106000 |
| 6  | -4.138811000 | 1.588696000  | -0.714410000 |
| 1  | -3.895753000 | 0.680988000  | -1.262313000 |
| 1  | -4.845598000 | 1.329846000  | 0.084323000  |
| 1  | -4.647570000 | 2.277796000  | -1.398690000 |
| 6  | -3.209463000 | 3.520263000  | 0.338260000  |
| 1  | -2.312501000 | 3.976452000  | 0.752280000  |
| 1  | -3.595745000 | 4.185997000  | -0.444209000 |
| 1  | -3.966730000 | 3.480929000  | 1.131805000  |
| 1  | -0.522557000 | 2.952219000  | 1.148654000  |
| 1  | -0.201308000 | 3.232554000  | -0.573795000 |

**9AI-S (T.E = -1677.694215)**

|    |             |              |              |
|----|-------------|--------------|--------------|
| 7  | 0.889842000 | -0.017389000 | -0.108000000 |
| 6  | 1.095368000 | 1.409832000  | -0.125317000 |
| 6  | 0.020897000 | 2.293281000  | -0.219594000 |
| 1  | 0.222634000 | 3.357929000  | -0.268150000 |
| 15 | 2.532891000 | -0.149920000 | 0.024297000  |
| 6  | 2.480117000 | 1.570746000  | -0.028010000 |
| 6  | 3.345020000 | 2.769441000  | 0.036392000  |
| 1  | 4.142612000 | 2.761349000  | -0.712697000 |
| 1  | 2.745895000 | 3.665072000  | -0.148059000 |
| 1  | 3.826679000 | 2.905638000  | 1.012302000  |
| 7  | 3.166150000 | -0.843738000 | 1.384315000  |
| 7  | 3.176657000 | -1.077336000 | -1.191524000 |
| 6  | 3.115992000 | -2.286687000 | 1.574068000  |
| 1  | 2.173007000 | -2.589003000 | 2.046870000  |
| 1  | 3.192448000 | -2.805128000 | 0.620463000  |
| 1  | 3.946439000 | -2.596347000 | 2.215286000  |
| 6  | 2.989176000 | -0.116416000 | 2.629992000  |
| 1  | 3.755180000 | -0.431730000 | 3.342984000  |
| 1  | 3.083876000 | 0.955798000  | 2.463971000  |
| 1  | 2.003267000 | -0.314282000 | 3.071545000  |
| 6  | 4.620764000 | -1.212987000 | -1.268676000 |

|    |              |              |              |
|----|--------------|--------------|--------------|
| 1  | 4.872432000  | -2.143527000 | -1.785095000 |
| 1  | 5.074450000  | -0.381969000 | -1.826337000 |
| 1  | 5.061871000  | -1.241117000 | -0.273324000 |
| 6  | 2.556230000  | -0.993743000 | -2.502887000 |
| 1  | 1.471685000  | -0.988801000 | -2.409853000 |
| 1  | 2.870848000  | -0.092334000 | -3.045844000 |
| 1  | 2.849543000  | -1.868864000 | -3.087660000 |
| 13 | -0.529640000 | -1.306242000 | 0.042074000  |
| 6  | -3.268376000 | -0.386877000 | 0.004353000  |
| 6  | -4.089056000 | -0.070241000 | 1.085816000  |
| 6  | -3.781937000 | -1.214075000 | -0.993489000 |
| 6  | -5.387865000 | -0.541361000 | 1.154158000  |
| 1  | -3.682851000 | 0.539878000  | 1.887206000  |
| 6  | -5.078728000 | -1.690738000 | -0.918041000 |
| 1  | -3.144613000 | -1.473565000 | -1.832019000 |
| 6  | -5.891405000 | -1.353140000 | 0.151224000  |
| 1  | -6.007574000 | -0.279947000 | 2.004606000  |
| 1  | -5.457365000 | -2.332475000 | -1.705670000 |
| 1  | -6.907124000 | -1.726032000 | 0.206729000  |
| 7  | -1.937035000 | 0.072567000  | -0.066896000 |
| 14 | -1.609152000 | 1.693440000  | -0.206873000 |
| 6  | -3.023647000 | 2.874882000  | -0.366790000 |
| 1  | -3.772894000 | 2.481588000  | -1.056468000 |
| 1  | -3.519544000 | 3.031743000  | 0.592536000  |
| 1  | -2.665407000 | 3.837692000  | -0.732985000 |

**9Al-T** (T.E = -1677.641632)

|    |             |              |              |
|----|-------------|--------------|--------------|
| 7  | 0.944557000 | -0.067872000 | -0.266185000 |
| 6  | 1.076239000 | 1.402210000  | -0.231363000 |
| 6  | 0.017185000 | 2.242569000  | -0.312787000 |
| 1  | 0.253649000 | 3.305124000  | -0.274189000 |
| 15 | 2.579561000 | -0.140563000 | 0.018555000  |
| 6  | 2.488730000 | 1.545862000  | -0.068877000 |
| 6  | 3.315893000 | 2.765292000  | 0.055165000  |
| 1  | 4.381963000 | 2.535099000  | -0.001517000 |
| 1  | 3.099442000 | 3.478055000  | -0.747788000 |
| 1  | 3.150277000 | 3.297355000  | 1.001722000  |
| 7  | 3.032853000 | -0.846563000 | 1.455609000  |
| 7  | 3.322855000 | -1.135984000 | -1.086562000 |
| 6  | 2.794185000 | -2.262892000 | 1.674154000  |
| 1  | 1.789580000 | -2.433498000 | 2.089062000  |
| 1  | 2.872164000 | -2.819361000 | 0.741341000  |
| 1  | 3.525969000 | -2.662717000 | 2.382681000  |
| 6  | 2.812691000 | -0.059665000 | 2.656884000  |
| 1  | 3.439034000 | -0.450446000 | 3.462847000  |
| 1  | 3.072163000 | 0.983469000  | 2.483649000  |
| 1  | 1.763940000 | -0.105142000 | 2.985062000  |
| 6  | 4.708635000 | -1.539691000 | -0.943874000 |

|    |              |              |              |
|----|--------------|--------------|--------------|
| 1  | 4.849428000  | -2.533335000 | -1.380859000 |
| 1  | 5.382855000  | -0.846384000 | -1.463263000 |
| 1  | 4.997436000  | -1.577685000 | 0.104643000  |
| 6  | 2.929745000  | -0.970411000 | -2.475623000 |
| 1  | 1.887012000  | -0.663525000 | -2.541012000 |
| 1  | 3.546215000  | -0.216770000 | -2.981027000 |
| 1  | 3.048097000  | -1.922062000 | -3.001027000 |
| 13 | -0.593471000 | -0.934373000 | 0.098697000  |
| 6  | -3.294227000 | -0.410988000 | -0.055798000 |
| 6  | -4.270058000 | 0.112653000  | 0.794540000  |
| 6  | -3.624791000 | -1.538567000 | -0.810253000 |
| 6  | -5.520885000 | -0.469057000 | 0.881595000  |
| 1  | -4.023742000 | 0.972744000  | 1.405800000  |
| 6  | -4.872990000 | -2.128180000 | -0.708934000 |
| 1  | -2.887257000 | -1.934347000 | -1.503318000 |
| 6  | -5.831496000 | -1.594505000 | 0.134199000  |
| 1  | -6.259149000 | -0.043980000 | 1.552538000  |
| 1  | -5.099694000 | -3.004857000 | -1.305306000 |
| 1  | -6.811744000 | -2.049673000 | 0.209050000  |
| 7  | -2.005997000 | 0.150654000  | -0.130021000 |
| 14 | -1.714172000 | 1.803602000  | -0.687177000 |
| 6  | -2.860314000 | 3.066523000  | 0.113536000  |
| 1  | -3.905142000 | 2.931808000  | -0.166135000 |
| 1  | -2.777017000 | 3.038845000  | 1.204368000  |
| 1  | -2.546487000 | 4.057587000  | -0.223503000 |

**10A1-S (T.E = -1599.762997)**

|    |              |              |              |
|----|--------------|--------------|--------------|
| 7  | -0.519943000 | -0.066236000 | 0.117581000  |
| 6  | -0.549523000 | 1.362871000  | 0.163255000  |
| 6  | 0.610284000  | 2.125481000  | 0.194165000  |
| 6  | 1.888809000  | 1.573989000  | 0.146454000  |
| 1  | 0.500765000  | 3.203037000  | 0.246834000  |
| 1  | 2.681031000  | 2.331299000  | 0.188649000  |
| 15 | -2.171619000 | 0.006199000  | 0.024958000  |
| 6  | -1.919479000 | 1.694572000  | 0.140698000  |
| 6  | -2.632132000 | 2.989911000  | 0.059640000  |
| 1  | -2.443368000 | 3.630189000  | 0.928417000  |
| 1  | -2.350878000 | 3.570499000  | -0.829070000 |
| 1  | -3.713275000 | 2.837522000  | 0.010715000  |
| 6  | 2.240515000  | 0.233592000  | 0.044918000  |
| 15 | 3.882531000  | -0.192459000 | -0.011066000 |
| 6  | 5.090085000  | 1.153977000  | 0.076535000  |
| 1  | 6.100419000  | 0.743514000  | 0.030830000  |
| 1  | 4.947562000  | 1.841847000  | -0.757775000 |
| 1  | 4.971546000  | 1.704554000  | 1.010549000  |
| 6  | 4.316610000  | -1.105414000 | -1.508711000 |
| 1  | 5.353689000  | -1.447150000 | -1.482500000 |
| 1  | 3.647797000  | -1.966399000 | -1.587133000 |

|    |              |              |              |
|----|--------------|--------------|--------------|
| 1  | 4.158390000  | -0.466474000 | -2.378289000 |
| 6  | 4.357724000  | -1.325107000 | 1.314070000  |
| 1  | 4.226690000  | -0.828779000 | 2.276334000  |
| 1  | 3.689105000  | -2.189053000 | 1.277801000  |
| 1  | 5.392757000  | -1.656693000 | 1.205016000  |
| 7  | -2.902038000 | -0.557243000 | -1.350843000 |
| 7  | -2.888193000 | -0.919995000 | 1.207015000  |
| 6  | -2.956912000 | -1.987864000 | -1.613659000 |
| 1  | -2.048969000 | -2.329455000 | -2.127319000 |
| 1  | -3.045513000 | -2.545933000 | -0.683543000 |
| 1  | -3.821955000 | -2.209643000 | -2.245933000 |
| 6  | -2.705277000 | 0.220599000  | -2.561589000 |
| 1  | -3.495469000 | -0.022992000 | -3.276705000 |
| 1  | -2.746323000 | 1.286706000  | -2.341918000 |
| 1  | -1.736153000 | -0.001191000 | -3.029180000 |
| 6  | -4.334856000 | -0.859436000 | 1.320005000  |
| 1  | -4.694765000 | -1.740405000 | 1.858422000  |
| 1  | -4.661126000 | 0.033371000  | 1.873260000  |
| 1  | -4.799614000 | -0.843558000 | 0.334876000  |
| 6  | -2.235548000 | -0.945253000 | 2.505506000  |
| 1  | -1.161309000 | -1.075912000 | 2.386406000  |
| 1  | -2.421061000 | -0.023022000 | 3.073287000  |
| 1  | -2.626550000 | -1.788902000 | 3.079393000  |
| 13 | 0.890947000  | -1.326175000 | -0.057985000 |

**10Al-T (T.E = -1599.707421)**

|    |              |              |              |
|----|--------------|--------------|--------------|
| 7  | 0.603207000  | -0.127316000 | -0.205043000 |
| 6  | 0.531734000  | 1.351172000  | -0.102819000 |
| 6  | -0.635201000 | 2.068845000  | -0.065873000 |
| 6  | -1.948514000 | 1.563180000  | -0.082535000 |
| 1  | -0.511008000 | 3.147458000  | -0.014063000 |
| 1  | -2.743342000 | 2.311937000  | -0.080814000 |
| 15 | 2.232500000  | 0.024970000  | -0.032595000 |
| 6  | 1.923805000  | 1.686729000  | -0.044005000 |
| 6  | 2.591616000  | 2.987698000  | 0.179132000  |
| 1  | 2.359875000  | 3.714511000  | -0.608134000 |
| 1  | 2.300909000  | 3.454037000  | 1.131725000  |
| 1  | 3.678723000  | 2.876290000  | 0.195193000  |
| 6  | -2.305510000 | 0.171393000  | -0.067912000 |
| 15 | -3.932726000 | -0.260389000 | -0.029567000 |
| 6  | -4.860828000 | 0.378983000  | 1.393598000  |
| 1  | -5.923453000 | 0.135141000  | 1.330313000  |
| 1  | -4.436642000 | -0.041326000 | 2.306276000  |
| 1  | -4.741978000 | 1.463288000  | 1.430212000  |
| 6  | -4.204252000 | -2.040646000 | 0.001386000  |
| 1  | -5.275828000 | -2.244740000 | 0.041518000  |
| 1  | -3.782739000 | -2.495787000 | -0.895586000 |
| 1  | -3.720730000 | -2.473265000 | 0.878293000  |

|    |              |              |              |
|----|--------------|--------------|--------------|
| 6  | -4.911775000 | 0.336827000  | -1.436289000 |
| 1  | -4.805022000 | 1.421025000  | -1.502096000 |
| 1  | -4.513526000 | -0.101294000 | -2.352225000 |
| 1  | -5.969300000 | 0.084813000  | -1.332233000 |
| 7  | 2.884440000  | -0.667742000 | 1.345686000  |
| 7  | 3.056483000  | -0.823775000 | -1.216825000 |
| 6  | 2.846884000  | -2.112405000 | 1.490937000  |
| 1  | 1.858622000  | -2.451221000 | 1.838859000  |
| 1  | 3.058110000  | -2.602275000 | 0.541860000  |
| 1  | 3.592332000  | -2.433190000 | 2.225283000  |
| 6  | 2.554708000  | 0.009519000  | 2.587803000  |
| 1  | 3.244023000  | -0.317118000 | 3.371093000  |
| 1  | 2.643217000  | 1.088479000  | 2.468138000  |
| 1  | 1.528799000  | -0.217019000 | 2.914800000  |
| 6  | 4.507486000  | -0.843402000 | -1.185262000 |
| 1  | 4.874651000  | -1.679811000 | -1.787446000 |
| 1  | 4.934443000  | 0.081526000  | -1.600368000 |
| 1  | 4.871981000  | -0.962274000 | -0.166291000 |
| 6  | 2.546020000  | -0.654527000 | -2.566452000 |
| 1  | 1.457021000  | -0.634804000 | -2.557952000 |
| 1  | 2.906134000  | 0.277046000  | -3.023664000 |
| 1  | 2.877958000  | -1.493982000 | -3.183612000 |
| 13 | -0.914291000 | -1.112655000 | -0.054895000 |

**11A1-S (T.E = -1517.573309)**

|    |              |              |              |
|----|--------------|--------------|--------------|
| 7  | 0.735650000  | -0.238216000 | -0.206633000 |
| 6  | 0.795299000  | 1.149025000  | 0.004731000  |
| 6  | -1.691669000 | 1.425876000  | 0.030763000  |
| 15 | 2.384714000  | -0.239699000 | -0.053179000 |
| 6  | 2.152872000  | 1.462883000  | 0.142530000  |
| 6  | 2.999668000  | 2.642330000  | 0.463973000  |
| 1  | 3.092145000  | 3.357729000  | -0.358830000 |
| 1  | 2.648559000  | 3.195964000  | 1.339673000  |
| 1  | 4.014541000  | 2.306021000  | 0.694443000  |
| 7  | 3.064749000  | -1.017349000 | 1.228437000  |
| 7  | 3.095406000  | -0.951812000 | -1.358933000 |
| 6  | 3.125104000  | -2.473863000 | 1.255255000  |
| 1  | 2.222055000  | -2.892765000 | 1.715124000  |
| 1  | 3.206824000  | -2.875972000 | 0.247474000  |
| 1  | 3.996060000  | -2.790162000 | 1.835594000  |
| 6  | 2.869647000  | -0.444922000 | 2.551555000  |
| 1  | 3.653329000  | -0.813609000 | 3.217468000  |
| 1  | 2.925819000  | 0.641645000  | 2.514099000  |
| 1  | 1.896707000  | -0.731368000 | 2.971307000  |
| 6  | 4.544824000  | -0.999497000 | -1.446514000 |
| 1  | 4.849032000  | -1.898534000 | -1.989701000 |
| 1  | 4.941175000  | -0.127335000 | -1.981716000 |
| 1  | 4.992440000  | -1.029196000 | -0.453916000 |

|    |              |              |              |
|----|--------------|--------------|--------------|
| 6  | 2.448800000  | -0.849500000 | -2.657614000 |
| 1  | 1.369691000  | -0.944485000 | -2.553984000 |
| 1  | 2.679828000  | 0.102419000  | -3.152010000 |
| 1  | 2.807695000  | -1.663076000 | -3.292175000 |
| 7  | -0.312477000 | 1.898838000  | 0.044035000  |
| 6  | -0.138025000 | 3.337527000  | 0.181075000  |
| 1  | 0.030407000  | 3.621208000  | 1.222769000  |
| 1  | 0.708863000  | 3.660746000  | -0.421669000 |
| 1  | -1.043373000 | 3.825289000  | -0.164634000 |
| 8  | -2.542777000 | 2.285583000  | 0.072412000  |
| 7  | -1.888225000 | 0.092168000  | 0.003011000  |
| 6  | -3.265829000 | -0.281672000 | 0.003941000  |
| 6  | -4.094976000 | 0.011163000  | -1.071939000 |
| 6  | -3.770707000 | -1.022467000 | 1.062664000  |
| 6  | -5.406291000 | -0.422814000 | -1.081054000 |
| 1  | -3.698199000 | 0.588557000  | -1.899153000 |
| 6  | -5.084695000 | -1.462134000 | 1.049670000  |
| 1  | -3.120396000 | -1.249835000 | 1.900743000  |
| 6  | -5.907488000 | -1.162230000 | -0.020313000 |
| 1  | -6.043361000 | -0.185567000 | -1.925608000 |
| 1  | -5.464278000 | -2.041401000 | 1.883631000  |
| 1  | -6.935622000 | -1.504764000 | -0.031736000 |
| 13 | -0.729489000 | -1.475716000 | -0.144659000 |

**11A1-T (T.E = -1517.497447)**

|    |              |              |              |
|----|--------------|--------------|--------------|
| 6  | 1.678358000  | -1.526220000 | -0.330301000 |
| 6  | -0.832300000 | -1.223604000 | -0.333086000 |
| 13 | 0.639140000  | 1.135093000  | -0.028068000 |
| 7  | -0.846127000 | 0.176154000  | -0.150569000 |
| 7  | 1.901186000  | -0.181052000 | -0.111951000 |
| 6  | 3.247440000  | 0.233836000  | 0.081437000  |
| 6  | 3.723509000  | 1.315479000  | -0.650177000 |
| 6  | 4.073460000  | -0.347991000 | 1.037703000  |
| 6  | 4.994482000  | 1.819618000  | -0.424820000 |
| 1  | 3.094390000  | 1.747923000  | -1.423872000 |
| 6  | 5.344610000  | 0.148226000  | 1.249173000  |
| 1  | 3.712047000  | -1.195051000 | 1.606265000  |
| 6  | 5.811047000  | 1.235436000  | 0.524532000  |
| 1  | 5.347208000  | 2.663718000  | -1.005824000 |
| 1  | 5.979197000  | -0.316581000 | 1.995027000  |
| 1  | 6.808663000  | 1.620373000  | 0.699015000  |
| 8  | 2.571177000  | -2.337517000 | -0.414210000 |
| 7  | 0.339333000  | -1.946918000 | -0.482581000 |
| 15 | -2.596879000 | 0.201879000  | -0.278917000 |
| 6  | -2.133920000 | -1.601939000 | -0.358573000 |
| 6  | -2.985772000 | -2.801377000 | -0.503488000 |
| 1  | -2.795692000 | -3.394039000 | -1.403128000 |
| 1  | -2.906747000 | -3.476054000 | 0.355699000  |

|   |              |              |              |
|---|--------------|--------------|--------------|
| 1 | -4.032814000 | -2.482793000 | -0.552646000 |
| 6 | 0.143095000  | -3.357169000 | -0.781272000 |
| 1 | -0.403154000 | -3.849370000 | 0.025787000  |
| 1 | -0.422747000 | -3.466805000 | -1.707538000 |
| 1 | 1.114976000  | -3.825426000 | -0.891643000 |
| 7 | -3.303449000 | 0.375247000  | 1.241106000  |
| 7 | -2.780502000 | 1.900031000  | -0.763585000 |
| 6 | -2.989318000 | -0.538045000 | 2.312502000  |
| 1 | -1.979816000 | -0.932502000 | 2.206142000  |
| 1 | -3.047856000 | -0.008552000 | 3.270254000  |
| 1 | -3.687750000 | -1.386349000 | 2.359126000  |
| 6 | -4.546050000 | 1.085063000  | 1.444051000  |
| 1 | -5.377608000 | 0.387057000  | 1.610797000  |
| 1 | -4.479174000 | 1.736284000  | 2.324850000  |
| 1 | -4.777953000 | 1.699526000  | 0.576639000  |
| 6 | -2.163257000 | 2.928285000  | 0.023076000  |
| 1 | -1.074189000 | 3.032959000  | -0.191743000 |
| 1 | -2.607601000 | 3.908342000  | -0.191566000 |
| 1 | -2.274269000 | 2.722838000  | 1.089461000  |
| 6 | -2.622264000 | 2.118874000  | -2.177669000 |
| 1 | -3.105973000 | 3.053853000  | -2.480023000 |
| 1 | -1.560796000 | 2.184532000  | -2.479980000 |
| 1 | -3.079199000 | 1.296782000  | -2.734246000 |

**12Al-S (T.E = -1730.350088)**

|    |              |              |              |
|----|--------------|--------------|--------------|
| 7  | 0.658662000  | -0.302638000 | -0.152061000 |
| 6  | 0.593833000  | 1.098277000  | -0.050371000 |
| 6  | -1.906962000 | 1.166810000  | -0.081183000 |
| 15 | 2.298630000  | -0.145758000 | -0.017839000 |
| 6  | 1.925289000  | 1.537162000  | 0.057373000  |
| 6  | 2.674222000  | 2.798907000  | 0.302631000  |
| 1  | 2.554144000  | 3.544909000  | -0.487635000 |
| 1  | 2.414051000  | 3.284701000  | 1.249678000  |
| 1  | 3.743466000  | 2.574156000  | 0.354655000  |
| 6  | -2.043559000 | -0.235948000 | -0.000709000 |
| 15 | -3.707487000 | -0.625144000 | 0.020809000  |
| 6  | -4.663631000 | 0.039212000  | 1.407110000  |
| 1  | -5.708127000 | -0.272773000 | 1.339961000  |
| 1  | -4.234002000 | -0.332521000 | 2.338428000  |
| 1  | -4.598077000 | 1.125950000  | 1.388718000  |
| 6  | -3.960326000 | -2.405605000 | 0.146954000  |
| 1  | -5.032129000 | -2.614855000 | 0.163589000  |
| 1  | -3.500795000 | -2.915575000 | -0.700720000 |
| 1  | -3.498731000 | -2.789067000 | 1.057872000  |
| 6  | -4.659515000 | -0.162086000 | -1.448003000 |
| 1  | -4.592666000 | 0.916645000  | -1.581190000 |
| 1  | -4.225423000 | -0.659824000 | -2.316407000 |
| 1  | -5.704666000 | -0.461482000 | -1.343102000 |

|    |              |              |              |
|----|--------------|--------------|--------------|
| 7  | 3.068405000  | -0.778699000 | 1.294701000  |
| 7  | 3.074399000  | -0.857034000 | -1.293961000 |
| 6  | 3.321590000  | -2.210441000 | 1.391094000  |
| 1  | 2.472580000  | -2.728247000 | 1.853229000  |
| 1  | 3.480351000  | -2.639634000 | 0.404072000  |
| 1  | 4.214077000  | -2.378175000 | 2.000694000  |
| 6  | 2.790950000  | -0.173549000 | 2.587217000  |
| 1  | 3.614465000  | -0.396455000 | 3.270096000  |
| 1  | 2.698114000  | 0.907495000  | 2.492678000  |
| 1  | 1.863491000  | -0.568285000 | 3.022094000  |
| 6  | 4.501658000  | -0.618336000 | -1.425835000 |
| 1  | 4.957484000  | -1.431656000 | -1.996706000 |
| 1  | 4.705316000  | 0.324698000  | -1.952005000 |
| 1  | 4.978315000  | -0.577485000 | -0.446436000 |
| 6  | 2.386127000  | -0.894656000 | -2.574510000 |
| 1  | 1.357771000  | -1.226336000 | -2.441700000 |
| 1  | 2.386656000  | 0.086616000  | -3.068096000 |
| 1  | 2.899779000  | -1.607191000 | -3.223828000 |
| 13 | -0.666935000 | -1.691957000 | -0.001821000 |
| 8  | -2.822036000 | 1.992447000  | -0.145195000 |
| 7  | -0.564211000 | 1.763868000  | -0.069068000 |
| 6  | -0.479815000 | 3.215011000  | -0.062535000 |
| 1  | -0.063879000 | 3.581233000  | 0.878403000  |
| 1  | 0.144448000  | 3.562879000  | -0.887131000 |
| 1  | -1.486681000 | 3.602665000  | -0.181212000 |

**12AI-T (T.E = -1730.277384)**

|    |              |              |              |
|----|--------------|--------------|--------------|
| 7  | -0.693720000 | -0.232062000 | 0.470346000  |
| 6  | -0.568567000 | 1.118248000  | -0.008233000 |
| 6  | 1.927449000  | 1.190133000  | 0.131608000  |
| 15 | -2.298833000 | -0.093547000 | 0.096700000  |
| 6  | -1.879459000 | 1.537681000  | -0.270727000 |
| 6  | -2.553631000 | 2.731955000  | -0.845032000 |
| 1  | -2.420053000 | 3.637778000  | -0.248302000 |
| 1  | -2.221981000 | 2.962231000  | -1.864026000 |
| 1  | -3.630478000 | 2.552569000  | -0.899473000 |
| 6  | 2.084010000  | -0.185831000 | -0.126953000 |
| 15 | 3.698403000  | -0.692965000 | 0.051616000  |
| 6  | 4.900692000  | 0.145490000  | -1.003998000 |
| 1  | 5.906678000  | -0.241000000 | -0.828030000 |
| 1  | 4.624694000  | -0.015526000 | -2.046950000 |
| 1  | 4.863819000  | 1.211780000  | -0.784740000 |
| 6  | 3.853942000  | -2.434358000 | -0.379012000 |
| 1  | 4.893446000  | -2.754483000 | -0.284825000 |
| 1  | 3.219914000  | -3.028763000 | 0.282779000  |
| 1  | 3.518887000  | -2.584795000 | -1.406968000 |
| 6  | 4.371639000  | -0.562224000 | 1.723055000  |
| 1  | 4.315028000  | 0.481971000  | 2.031002000  |



|    |              |              |              |
|----|--------------|--------------|--------------|
| 1  | 3.756373000  | -1.167688000 | 2.390668000  |
| 1  | 5.406892000  | -0.907414000 | 1.761636000  |
| 7  | -2.890651000 | -0.961931000 | -1.175962000 |
| 7  | -3.216949000 | -0.623727000 | 1.361291000  |
| 6  | -2.905605000 | -2.414071000 | -1.104812000 |
| 1  | -1.999808000 | -2.823286000 | -1.575857000 |
| 1  | -2.932911000 | -2.752848000 | -0.069145000 |
| 1  | -3.784672000 | -2.806814000 | -1.626313000 |
| 6  | -2.688611000 | -0.475872000 | -2.532152000 |
| 1  | -3.458948000 | -0.906508000 | -3.179404000 |
| 1  | -2.769104000 | 0.608507000  | -2.570908000 |
| 1  | -1.694892000 | -0.764618000 | -2.905666000 |
| 6  | -4.650290000 | -0.808682000 | 1.265053000  |
| 1  | -4.946976000 | -1.701825000 | 1.824372000  |
| 1  | -5.190538000 | 0.047766000  | 1.687241000  |
| 1  | -4.955049000 | -0.933708000 | 0.227492000  |
| 6  | -2.754436000 | -0.366915000 | 2.713491000  |
| 1  | -1.669560000 | -0.277394000 | 2.723951000  |
| 1  | -3.194678000 | 0.552664000  | 3.117949000  |
| 1  | -3.046075000 | -1.200000000 | 3.359413000  |
| 13 | 0.577963000  | -1.369626000 | -0.379011000 |
| 8  | 2.832092000  | 1.976634000  | 0.445767000  |
| 7  | 0.600376000  | 1.774867000  | -0.019473000 |
| 6  | 0.537923000  | 3.216976000  | -0.188666000 |
| 1  | 0.173740000  | 3.481288000  | -1.183653000 |
| 1  | -0.116248000 | 3.663271000  | 0.562434000  |
| 1  | 1.544957000  | 3.601381000  | -0.053558000 |

**13AI-S (T.E = -1843.122347)**

|    |              |              |              |
|----|--------------|--------------|--------------|
| 7  | -1.318448000 | -0.213983000 | 0.091939000  |
| 6  | -1.214120000 | 1.221091000  | 0.032025000  |
| 6  | -0.000487000 | 1.891569000  | -0.018238000 |
| 6  | 1.213667000  | 1.221114000  | -0.055757000 |
| 1  | -0.000956000 | 2.976283000  | -0.029286000 |
| 13 | 0.000724000  | -1.593162000 | 0.015878000  |
| 15 | -2.952183000 | 0.002889000  | 0.032827000  |
| 6  | -2.545599000 | 1.667812000  | 0.026880000  |
| 6  | -3.138064000 | 3.016902000  | -0.120864000 |
| 1  | -2.856645000 | 3.689696000  | 0.696464000  |
| 1  | -2.835030000 | 3.507986000  | -1.054778000 |
| 1  | -4.229457000 | 2.967918000  | -0.126520000 |
| 7  | 1.319025000  | -0.214771000 | -0.086648000 |
| 6  | 2.544738000  | 1.668878000  | -0.061221000 |
| 15 | 2.952708000  | 0.004417000  | -0.033447000 |
| 6  | 3.135624000  | 3.021474000  | 0.058016000  |
| 1  | 2.850598000  | 3.677310000  | -0.771743000 |
| 1  | 2.834525000  | 3.530620000  | 0.982845000  |
| 1  | 4.227090000  | 2.974488000  | 0.061342000  |

|   |              |              |              |
|---|--------------|--------------|--------------|
| 7 | 3.765437000  | -0.545139000 | 1.305084000  |
| 7 | 3.712997000  | -0.815121000 | -1.260559000 |
| 6 | 3.865042000  | -1.979889000 | 1.531888000  |
| 1 | 2.974234000  | -2.360122000 | 2.049353000  |
| 1 | 3.956626000  | -2.515192000 | 0.588350000  |
| 1 | 4.744215000  | -2.193899000 | 2.146703000  |
| 6 | 3.553566000  | 0.191233000  | 2.539592000  |
| 1 | 2.589345000  | -0.062579000 | 3.001775000  |
| 1 | 4.349083000  | -0.060049000 | 3.245796000  |
| 1 | 3.575471000  | 1.264351000  | 2.355578000  |
| 6 | 3.062518000  | -0.831507000 | -2.558867000 |
| 1 | 3.400378000  | -1.709090000 | -3.116274000 |
| 1 | 1.981930000  | -0.893403000 | -2.440400000 |
| 1 | 3.304646000  | 0.065296000  | -3.144152000 |
| 6 | 5.159703000  | -0.806348000 | -1.362004000 |
| 1 | 5.516569000  | 0.043811000  | -1.959105000 |
| 1 | 5.617001000  | -0.750637000 | -0.375586000 |
| 1 | 5.497834000  | -1.725169000 | -1.850653000 |
| 7 | -3.713503000 | -0.790588000 | 1.276752000  |
| 7 | -3.764002000 | -0.574770000 | -1.294228000 |
| 6 | -5.160188000 | -0.767571000 | 1.378921000  |
| 1 | -5.504688000 | -1.668788000 | 1.894974000  |
| 1 | -5.510092000 | 0.102834000  | 1.950582000  |
| 1 | -5.617925000 | -0.737969000 | 0.391537000  |
| 6 | -3.062739000 | -0.778075000 | 2.575101000  |
| 1 | -1.982849000 | -0.853520000 | 2.458221000  |
| 1 | -3.296020000 | 0.136480000  | 3.136109000  |
| 1 | -3.409026000 | -1.637039000 | 3.155765000  |
| 6 | -3.549272000 | 0.133805000  | -2.544386000 |
| 1 | -4.345168000 | -0.130384000 | -3.245421000 |
| 1 | -3.568004000 | 1.210736000  | -2.383662000 |
| 1 | -2.585583000 | -0.132958000 | -3.000332000 |
| 6 | -3.867665000 | -2.013874000 | -1.489305000 |
| 1 | -3.962434000 | -2.527628000 | -0.534169000 |
| 1 | -4.746550000 | -2.238674000 | -2.100667000 |
| 1 | -2.977295000 | -2.408274000 | -1.996835000 |

**13Al-T (T.E = -1843.038580)**

|    |              |              |              |
|----|--------------|--------------|--------------|
| 7  | -1.377194000 | 0.239496000  | -0.554202000 |
| 6  | -1.226858000 | -1.194442000 | -0.459004000 |
| 6  | -0.000091000 | -1.846301000 | -0.443362000 |
| 6  | 1.226717000  | -1.194487000 | -0.458740000 |
| 1  | -0.000110000 | -2.924901000 | -0.324926000 |
| 15 | -2.950085000 | -0.007485000 | -0.118727000 |
| 6  | -2.537208000 | -1.664223000 | -0.287817000 |
| 6  | -3.068849000 | -3.028312000 | -0.070302000 |
| 1  | -2.972234000 | -3.663405000 | -0.957221000 |
| 1  | -2.552696000 | -3.544809000 | 0.749439000  |

|    |              |              |              |
|----|--------------|--------------|--------------|
| 1  | -4.130151000 | -3.002204000 | 0.186126000  |
| 7  | -3.389120000 | 0.471088000  | 1.405906000  |
| 7  | -3.967538000 | 0.870347000  | -1.079197000 |
| 6  | -3.327264000 | 1.888878000  | 1.732287000  |
| 1  | -2.325006000 | 2.148811000  | 2.106821000  |
| 1  | -3.535207000 | 2.500132000  | 0.854477000  |
| 1  | -4.062958000 | 2.125733000  | 2.507020000  |
| 6  | -2.955105000 | -0.359781000 | 2.520803000  |
| 1  | -3.555563000 | -0.109346000 | 3.400207000  |
| 1  | -3.093254000 | -1.415071000 | 2.291670000  |
| 1  | -1.891782000 | -0.185511000 | 2.750018000  |
| 6  | -5.372488000 | 1.058027000  | -0.787035000 |
| 1  | -5.670870000 | 2.081587000  | -1.037568000 |
| 1  | -5.995715000 | 0.373134000  | -1.375414000 |
| 1  | -5.572956000 | 0.887681000  | 0.269212000  |
| 6  | -3.644433000 | 0.988320000  | -2.489298000 |
| 1  | -2.572254000 | 0.868807000  | -2.637288000 |
| 1  | -4.174598000 | 0.235318000  | -3.085118000 |
| 1  | -3.937523000 | 1.979332000  | -2.847451000 |
| 13 | 0.000023000  | 1.328418000  | 0.112275000  |
| 7  | 1.377212000  | 0.239502000  | -0.554544000 |
| 15 | 2.949984000  | -0.007465000 | -0.118693000 |
| 6  | 2.536961000  | -1.664250000 | -0.287045000 |
| 6  | 3.068880000  | -3.028192000 | -0.069294000 |
| 1  | 2.550996000  | -3.545494000 | 0.748828000  |
| 1  | 2.974926000  | -3.662806000 | -0.956850000 |
| 1  | 4.129514000  | -3.001578000 | 0.189864000  |
| 7  | 3.388890000  | 0.471644000  | 1.405814000  |
| 7  | 3.967709000  | 0.869847000  | -1.079349000 |
| 6  | 3.327048000  | 1.889549000  | 1.731657000  |
| 1  | 3.534484000  | 2.500485000  | 0.853494000  |
| 1  | 2.324935000  | 2.149524000  | 2.106546000  |
| 1  | 4.063093000  | 2.126847000  | 2.505933000  |
| 6  | 2.955145000  | -0.358852000 | 2.521067000  |
| 1  | 1.891830000  | -0.184643000 | 2.750368000  |
| 1  | 3.093396000  | -1.414219000 | 2.292337000  |
| 1  | 3.555690000  | -0.108001000 | 3.400301000  |
| 6  | 5.372593000  | 1.057701000  | -0.786978000 |
| 1  | 5.671096000  | 2.080973000  | -1.038520000 |
| 1  | 5.572741000  | 0.888452000  | 0.269505000  |
| 1  | 5.995961000  | 0.372155000  | -1.374454000 |
| 6  | 3.644902000  | 0.987177000  | -2.489575000 |
| 1  | 4.175439000  | 0.234099000  | -3.084972000 |
| 1  | 2.572795000  | 0.867264000  | -2.637775000 |
| 1  | 3.937779000  | 1.978135000  | -2.848059000 |

**1Ga-S (T.E = -2613.258555)**

|   |             |             |             |
|---|-------------|-------------|-------------|
| 7 | 0.586602000 | 0.266836000 | 1.452935000 |
|---|-------------|-------------|-------------|

|    |              |              |              |
|----|--------------|--------------|--------------|
| 7  | 0.586602000  | 0.266836000  | -1.452935000 |
| 6  | 1.848855000  | 0.562935000  | 1.233987000  |
| 6  | 1.848855000  | 0.562935000  | -1.233987000 |
| 6  | 2.464240000  | 0.713449000  | 0.000000000  |
| 1  | 3.508156000  | 0.995359000  | 0.000000000  |
| 6  | 0.166190000  | 0.087531000  | 2.784155000  |
| 6  | 0.904502000  | -0.663925000 | 3.696058000  |
| 6  | -1.047780000 | 0.635086000  | 3.191958000  |
| 6  | 0.448069000  | -0.840787000 | 4.989277000  |
| 6  | -1.501963000 | 0.449407000  | 4.484643000  |
| 6  | -0.755691000 | -0.285503000 | 5.390692000  |
| 1  | 1.032606000  | -1.430966000 | 5.685827000  |
| 1  | -2.444876000 | 0.889603000  | 4.787748000  |
| 1  | -1.113326000 | -0.430321000 | 6.402994000  |
| 6  | 0.166190000  | 0.087531000  | -2.784155000 |
| 6  | -1.047780000 | 0.635086000  | -3.191958000 |
| 6  | 0.904502000  | -0.663925000 | -3.696058000 |
| 6  | -1.501963000 | 0.449407000  | -4.484643000 |
| 6  | 0.448069000  | -0.840787000 | -4.989277000 |
| 6  | -0.755691000 | -0.285503000 | -5.390692000 |
| 1  | -2.444876000 | 0.889603000  | -4.787748000 |
| 1  | 1.032606000  | -1.430966000 | -5.685827000 |
| 1  | -1.113326000 | -0.430321000 | -6.402994000 |
| 1  | 1.827507000  | -1.133666000 | -3.373858000 |
| 1  | -1.619153000 | 1.230474000  | -2.487798000 |
| 1  | -1.619153000 | 1.230474000  | 2.487798000  |
| 1  | 1.827507000  | -1.133666000 | 3.373858000  |
| 31 | -0.889664000 | -0.260066000 | 0.000000000  |
| 1  | 2.480929000  | 0.731560000  | -2.111419000 |
| 1  | 2.480929000  | 0.731560000  | 2.111419000  |

**1Ga-T (T.E = -2613.180916)**

|   |              |              |              |
|---|--------------|--------------|--------------|
| 7 | -0.635694000 | -0.113475000 | 1.440590000  |
| 7 | -0.611872000 | 0.063406000  | -1.463973000 |
| 6 | -1.978887000 | -0.188627000 | 1.236117000  |
| 6 | -1.968605000 | 0.081034000  | -1.274758000 |
| 6 | -2.557333000 | -0.064631000 | -0.025310000 |
| 1 | -3.642262000 | -0.095509000 | -0.034532000 |
| 6 | -0.095697000 | -0.226233000 | 2.706093000  |
| 6 | -0.833095000 | -0.136787000 | 3.896360000  |
| 6 | 1.285684000  | -0.456454000 | 2.806938000  |
| 6 | -0.210057000 | -0.285775000 | 5.119594000  |
| 6 | 1.898678000  | -0.599472000 | 4.030500000  |
| 6 | 1.153791000  | -0.517743000 | 5.200792000  |
| 1 | -0.799114000 | -0.210477000 | 6.026724000  |
| 1 | 2.965714000  | -0.783602000 | 4.077081000  |
| 1 | 1.633972000  | -0.631709000 | 6.164974000  |
| 6 | -0.071920000 | -0.101900000 | -2.710875000 |

|    |              |              |              |
|----|--------------|--------------|--------------|
| 6  | 1.316334000  | 0.064877000  | -2.880268000 |
| 6  | -0.819201000 | -0.491057000 | -3.839539000 |
| 6  | 1.918811000  | -0.134292000 | -4.098953000 |
| 6  | -0.202041000 | -0.691232000 | -5.057003000 |
| 6  | 1.164327000  | -0.510500000 | -5.205046000 |
| 1  | 2.989002000  | 0.008446000  | -4.194799000 |
| 1  | -0.799472000 | -1.003154000 | -5.906376000 |
| 1  | 1.638041000  | -0.663819000 | -6.166847000 |
| 1  | -1.880386000 | -0.680169000 | -3.747714000 |
| 1  | 1.913866000  | 0.375793000  | -2.027917000 |
| 1  | 1.865198000  | -0.545341000 | 1.892335000  |
| 1  | -1.894485000 | 0.072936000  | 3.865043000  |
| 31 | 0.371139000  | 1.082053000  | 0.069760000  |
| 1  | -2.622925000 | 0.207860000  | -2.131418000 |
| 1  | -2.637342000 | -0.376528000 | 2.077204000  |

**2Ga-S (T.E = -2734.524165)**

|    |              |              |              |
|----|--------------|--------------|--------------|
| 7  | 1.841461000  | 0.472945000  | 0.534455000  |
| 6  | 1.519504000  | 1.700620000  | 0.501169000  |
| 6  | 0.248733000  | 2.196181000  | 1.064548000  |
| 7  | -1.127101000 | 0.151242000  | 0.332579000  |
| 1  | 0.256964000  | 3.283752000  | 1.081602000  |
| 1  | 2.174949000  | 2.418990000  | -0.011213000 |
| 6  | 3.046524000  | 0.014475000  | -0.017205000 |
| 6  | 3.014764000  | -1.122787000 | -0.817774000 |
| 6  | 4.262869000  | 0.635264000  | 0.244051000  |
| 6  | 4.180667000  | -1.611389000 | -1.374761000 |
| 1  | 2.060362000  | -1.602210000 | -1.012963000 |
| 6  | 5.427843000  | 0.135920000  | -0.311344000 |
| 1  | 4.290584000  | 1.494332000  | 0.905632000  |
| 6  | 5.391196000  | -0.984208000 | -1.124086000 |
| 1  | 4.145313000  | -2.490600000 | -2.007299000 |
| 1  | 6.373146000  | 0.621835000  | -0.098998000 |
| 1  | 6.305666000  | -1.374660000 | -1.554123000 |
| 6  | -2.257488000 | -0.594859000 | 0.010962000  |
| 6  | -2.138314000 | -1.762601000 | -0.750419000 |
| 6  | -3.528999000 | -0.267972000 | 0.497858000  |
| 6  | -3.239218000 | -2.558613000 | -1.023362000 |
| 1  | -1.164184000 | -2.014495000 | -1.161706000 |
| 6  | -4.625450000 | -1.055932000 | 0.211952000  |
| 1  | -3.635030000 | 0.623443000  | 1.108207000  |
| 6  | -4.490535000 | -2.208831000 | -0.550126000 |
| 1  | -3.115030000 | -3.455300000 | -1.620416000 |
| 1  | -5.599383000 | -0.774728000 | 0.597747000  |
| 1  | -5.353264000 | -2.826829000 | -0.767707000 |
| 31 | 0.149053000  | -1.049385000 | 1.345263000  |
| 5  | -0.980481000 | 1.554380000  | 0.214040000  |
| 7  | -1.745078000 | 2.405488000  | -0.638946000 |

|   |              |             |              |
|---|--------------|-------------|--------------|
| 6 | -2.596079000 | 1.919879000 | -1.701970000 |
| 1 | -2.411502000 | 0.868817000 | -1.910958000 |
| 1 | -3.662193000 | 2.036796000 | -1.465944000 |
| 1 | -2.398080000 | 2.487663000 | -2.619250000 |
| 6 | -1.792993000 | 3.844444000 | -0.570023000 |
| 1 | -2.831275000 | 4.189296000 | -0.479338000 |
| 1 | -1.248358000 | 4.231198000 | 0.288268000  |
| 1 | -1.380607000 | 4.307607000 | -1.476672000 |
| 1 | 0.150567000  | 1.848840000 | 2.098343000  |

**2Ga-T (T.E = -2734.453350)**

|    |              |              |              |
|----|--------------|--------------|--------------|
| 7  | -1.793719000 | 0.355487000  | -0.292407000 |
| 6  | -1.454571000 | 1.673479000  | -0.399797000 |
| 6  | -0.177306000 | 2.066387000  | -1.042196000 |
| 7  | 1.215605000  | 0.042005000  | -0.259580000 |
| 1  | -0.159509000 | 3.151499000  | -1.141218000 |
| 1  | -2.062109000 | 2.395614000  | 0.138519000  |
| 6  | -3.101316000 | -0.037686000 | -0.003006000 |
| 6  | -3.342635000 | -1.292935000 | 0.558333000  |
| 6  | -4.193653000 | 0.791491000  | -0.262651000 |
| 6  | -4.626785000 | -1.708952000 | 0.841369000  |
| 1  | -2.496977000 | -1.938379000 | 0.788909000  |
| 6  | -5.476834000 | 0.375383000  | 0.042697000  |
| 1  | -4.028090000 | 1.753359000  | -0.733571000 |
| 6  | -5.706357000 | -0.873593000 | 0.593585000  |
| 1  | -4.786278000 | -2.689868000 | 1.274301000  |
| 1  | -6.311131000 | 1.035119000  | -0.168387000 |
| 1  | -6.713943000 | -1.195174000 | 0.827066000  |
| 6  | 2.401719000  | -0.682536000 | -0.130844000 |
| 6  | 2.435746000  | -1.894067000 | 0.561545000  |
| 6  | 3.586153000  | -0.233479000 | -0.719460000 |
| 6  | 3.604254000  | -2.626295000 | 0.663722000  |
| 1  | 1.525881000  | -2.248037000 | 1.040946000  |
| 6  | 4.756084000  | -0.958938000 | -0.599774000 |
| 1  | 3.571726000  | 0.698657000  | -1.274391000 |
| 6  | 4.775444000  | -2.161330000 | 0.089246000  |
| 1  | 3.600212000  | -3.564774000 | 1.206503000  |
| 1  | 5.662440000  | -0.585987000 | -1.063663000 |
| 1  | 5.692498000  | -2.731476000 | 0.174000000  |
| 31 | -0.389392000 | -0.893164000 | -0.615889000 |
| 5  | 1.065567000  | 1.484559000  | -0.216602000 |
| 7  | 1.895235000  | 2.310326000  | 0.581754000  |
| 6  | 2.758038000  | 1.824528000  | 1.634496000  |
| 1  | 2.557306000  | 0.780073000  | 1.862605000  |
| 1  | 3.819970000  | 1.917862000  | 1.372243000  |
| 1  | 2.590570000  | 2.408911000  | 2.546841000  |
| 6  | 1.965135000  | 3.747486000  | 0.476608000  |
| 1  | 3.004038000  | 4.071179000  | 0.336213000  |

|   |              |             |              |
|---|--------------|-------------|--------------|
| 1 | 1.387734000  | 4.117520000 | -0.367235000 |
| 1 | 1.594616000  | 4.233802000 | 1.388063000  |
| 1 | -0.144186000 | 1.646992000 | -2.063793000 |

**3Ga-S** (T.E = -2903.955395)

|    |              |              |              |
|----|--------------|--------------|--------------|
| 7  | 1.706801000  | 0.595816000  | -0.171335000 |
| 6  | 1.579694000  | 1.902632000  | -0.273472000 |
| 6  | 0.400337000  | 2.631411000  | -0.341646000 |
| 7  | -1.395329000 | 0.319643000  | -0.078487000 |
| 1  | 0.493834000  | 3.702896000  | -0.476066000 |
| 1  | 2.512673000  | 2.476296000  | -0.337844000 |
| 6  | 3.008993000  | 0.076607000  | -0.054438000 |
| 6  | 3.371118000  | -1.035798000 | -0.811811000 |
| 6  | 3.941185000  | 0.610918000  | 0.833765000  |
| 6  | 4.634302000  | -1.586147000 | -0.695502000 |
| 1  | 2.654595000  | -1.448192000 | -1.514234000 |
| 6  | 5.205977000  | 0.061569000  | 0.940272000  |
| 1  | 3.655195000  | 1.448431000  | 1.461024000  |
| 6  | 5.559829000  | -1.039036000 | 0.177574000  |
| 1  | 4.899592000  | -2.446465000 | -1.299205000 |
| 1  | 5.917131000  | 0.489702000  | 1.637729000  |
| 1  | 6.549007000  | -1.471561000 | 0.267747000  |
| 6  | -2.635438000 | -0.324438000 | 0.025444000  |
| 6  | -2.976194000 | -1.333058000 | -0.877522000 |
| 6  | -3.536834000 | -0.026052000 | 1.048772000  |
| 6  | -4.181551000 | -2.003357000 | -0.768767000 |
| 1  | -2.283305000 | -1.569734000 | -1.678376000 |
| 6  | -4.743437000 | -0.693647000 | 1.149168000  |
| 1  | -3.264918000 | 0.729121000  | 1.780310000  |
| 6  | -5.074552000 | -1.685766000 | 0.240535000  |
| 1  | -4.425307000 | -2.780712000 | -1.484113000 |
| 1  | -5.427463000 | -0.442247000 | 1.951968000  |
| 1  | -6.018511000 | -2.210798000 | 0.322650000  |
| 31 | 0.228644000  | -1.013670000 | 0.172231000  |
| 14 | -1.201174000 | 1.940302000  | -0.269287000 |
| 6  | -2.678930000 | 3.040010000  | -0.435183000 |
| 1  | -3.471460000 | 2.534138000  | -0.989116000 |
| 1  | -3.081600000 | 3.303257000  | 0.544729000  |
| 1  | -2.408280000 | 3.962121000  | -0.950739000 |

**3Ga-T** (T.E = -2903.882977)

|   |              |             |              |
|---|--------------|-------------|--------------|
| 7 | 1.711858000  | 0.549028000 | -0.183182000 |
| 6 | 1.532419000  | 1.913810000 | -0.126859000 |
| 6 | 0.363352000  | 2.583128000 | -0.153511000 |
| 7 | -1.394900000 | 0.272041000 | -0.085958000 |
| 1 | 0.463798000  | 3.665882000 | -0.140993000 |

|    |              |              |              |
|----|--------------|--------------|--------------|
| 1  | 2.466709000  | 2.474380000  | -0.083962000 |
| 6  | 2.999704000  | 0.000323000  | -0.068401000 |
| 6  | 3.310507000  | -1.168175000 | -0.763374000 |
| 6  | 3.980430000  | 0.567082000  | 0.744921000  |
| 6  | 4.555264000  | -1.755932000 | -0.643599000 |
| 1  | 2.565631000  | -1.600546000 | -1.426129000 |
| 6  | 5.231005000  | -0.015665000 | 0.844647000  |
| 1  | 3.751439000  | 1.453122000  | 1.325290000  |
| 6  | 5.527986000  | -1.179870000 | 0.156781000  |
| 1  | 4.771405000  | -2.663281000 | -1.195728000 |
| 1  | 5.977472000  | 0.440403000  | 1.485153000  |
| 1  | 6.507069000  | -1.634629000 | 0.244137000  |
| 6  | -2.599697000 | -0.435663000 | 0.002661000  |
| 6  | -2.730290000 | -1.513454000 | 0.880696000  |
| 6  | -3.706839000 | -0.084397000 | -0.772499000 |
| 6  | -3.918416000 | -2.211072000 | 0.978667000  |
| 1  | -1.882163000 | -1.787953000 | 1.502476000  |
| 6  | -4.899735000 | -0.773959000 | -0.657696000 |
| 1  | -3.612273000 | 0.732015000  | -1.483226000 |
| 6  | -5.014730000 | -1.842844000 | 0.214806000  |
| 1  | -3.991610000 | -3.045226000 | 1.667201000  |
| 1  | -5.744711000 | -0.479522000 | -1.269856000 |
| 1  | -5.947975000 | -2.386409000 | 0.297419000  |
| 31 | 0.232756000  | -0.644758000 | -0.149351000 |
| 14 | -1.353223000 | 2.002992000  | -0.405732000 |
| 6  | -2.545274000 | 2.885300000  | 0.747509000  |
| 1  | -3.588584000 | 2.710767000  | 0.485844000  |
| 1  | -2.383424000 | 2.547716000  | 1.774959000  |
| 1  | -2.355922000 | 3.959705000  | 0.703044000  |

**4Ga-S (T.E = -2826.033818)**

|   |              |              |              |
|---|--------------|--------------|--------------|
| 7 | 1.262213000  | 0.596711000  | -0.204057000 |
| 6 | 0.993042000  | 1.882339000  | -0.379957000 |
| 6 | -0.249179000 | 2.482187000  | -0.432524000 |
| 6 | -1.473857000 | 1.822829000  | -0.286312000 |
| 6 | -1.660321000 | 0.474838000  | -0.082439000 |
| 6 | 2.616599000  | 0.233146000  | -0.091059000 |
| 6 | 3.086171000  | -0.896209000 | -0.759188000 |
| 6 | 3.505703000  | 0.951633000  | 0.707331000  |
| 6 | 4.407710000  | -1.284270000 | -0.642496000 |
| 1 | 2.399472000  | -1.456791000 | -1.383745000 |
| 6 | 4.828487000  | 0.562213000  | 0.815742000  |
| 1 | 3.141613000  | 1.805630000  | 1.268171000  |
| 6 | 5.288191000  | -0.556624000 | 0.141678000  |
| 1 | 4.754620000  | -2.161784000 | -1.176414000 |
| 1 | 5.502766000  | 1.131948000  | 1.445486000  |
| 1 | 6.323589000  | -0.863099000 | 0.231389000  |
| 1 | 1.851837000  | 2.545453000  | -0.521246000 |



|    |              |              |              |
|----|--------------|--------------|--------------|
| 15 | -3.241650000 | -0.145708000 | 0.066192000  |
| 6  | -4.617086000 | 1.023955000  | -0.058765000 |
| 1  | -5.565148000 | 0.494336000  | 0.051567000  |
| 1  | -4.537266000 | 1.778840000  | 0.724467000  |
| 1  | -4.597378000 | 1.521526000  | -1.029161000 |
| 6  | -3.581797000 | -1.410047000 | -1.174744000 |
| 1  | -3.528515000 | -0.963514000 | -2.168201000 |
| 1  | -2.811227000 | -2.181013000 | -1.101600000 |
| 1  | -4.564825000 | -1.860817000 | -1.023658000 |
| 6  | -3.487654000 | -0.999315000 | 1.636301000  |
| 1  | -3.377749000 | -0.287478000 | 2.455093000  |
| 1  | -4.473207000 | -1.467278000 | 1.682732000  |
| 1  | -2.714336000 | -1.764168000 | 1.738923000  |
| 1  | -2.340507000 | 2.492068000  | -0.350583000 |
| 1  | -0.261929000 | 3.550742000  | -0.608762000 |
| 31 | -0.108020000 | -0.968581000 | 0.123860000  |

**4Ga-T (T.E = -2825.971894)**

|    |              |              |              |
|----|--------------|--------------|--------------|
| 7  | 1.324718000  | 0.570836000  | -0.225909000 |
| 6  | 0.999061000  | 1.912316000  | -0.352541000 |
| 6  | -0.269055000 | 2.449231000  | -0.307116000 |
| 6  | -1.493627000 | 1.810481000  | -0.132259000 |
| 6  | -1.686910000 | 0.393445000  | 0.023656000  |
| 6  | 2.644306000  | 0.178467000  | -0.065478000 |
| 6  | 3.022317000  | -1.135866000 | -0.373635000 |
| 6  | 3.638318000  | 1.037763000  | 0.421764000  |
| 6  | 4.318308000  | -1.571357000 | -0.194502000 |
| 1  | 2.276259000  | -1.811968000 | -0.785170000 |
| 6  | 4.937316000  | 0.593969000  | 0.586457000  |
| 1  | 3.379248000  | 2.048585000  | 0.711080000  |
| 6  | 5.294720000  | -0.709167000 | 0.283249000  |
| 1  | 4.573467000  | -2.594706000 | -0.447273000 |
| 1  | 5.681556000  | 1.281262000  | 0.974503000  |
| 1  | 6.314929000  | -1.048066000 | 0.415075000  |
| 1  | 1.828787000  | 2.582160000  | -0.557723000 |
| 15 | -3.237615000 | -0.262599000 | 0.146843000  |
| 6  | -4.180194000 | 0.382262000  | 1.553539000  |
| 1  | -5.197150000 | -0.014784000 | 1.570593000  |
| 1  | -3.663293000 | 0.121018000  | 2.477349000  |
| 1  | -4.221717000 | 1.470418000  | 1.480794000  |
| 6  | -4.339009000 | 0.063901000  | -1.257433000 |
| 1  | -4.377574000 | 1.141498000  | -1.427376000 |
| 1  | -3.924789000 | -0.407780000 | -2.149309000 |
| 1  | -5.349890000 | -0.307693000 | -1.076476000 |
| 6  | -3.228323000 | -2.049498000 | 0.343447000  |
| 1  | -2.655657000 | -2.320987000 | 1.230815000  |
| 1  | -4.253568000 | -2.408062000 | 0.450703000  |
| 1  | -2.771951000 | -2.518910000 | -0.528601000 |

|    |              |              |              |
|----|--------------|--------------|--------------|
| 1  | -2.375858000 | 2.453637000  | -0.138913000 |
| 1  | -0.305324000 | 3.524729000  | -0.448178000 |
| 31 | -0.116441000 | -0.689771000 | -0.178969000 |

**5Ga-S** (T.E = -2743.835892)

|    |              |              |              |
|----|--------------|--------------|--------------|
| 7  | 1.514479000  | 0.319326000  | -0.125676000 |
| 6  | 1.298216000  | 1.581738000  | -0.250394000 |
| 7  | -1.311293000 | 0.332819000  | -0.098993000 |
| 1  | 2.156284000  | 2.256490000  | -0.338908000 |
| 6  | 2.854950000  | -0.109328000 | -0.025787000 |
| 6  | 3.266524000  | -1.201416000 | -0.782294000 |
| 6  | 3.757766000  | 0.496003000  | 0.842331000  |
| 6  | 4.567125000  | -1.660484000 | -0.690991000 |
| 1  | 2.558453000  | -1.673159000 | -1.454964000 |
| 6  | 5.059325000  | 0.033671000  | 0.926415000  |
| 1  | 3.426035000  | 1.313067000  | 1.474312000  |
| 6  | 5.469752000  | -1.043229000 | 0.159663000  |
| 1  | 4.878406000  | -2.507013000 | -1.291649000 |
| 1  | 5.753142000  | 0.511281000  | 1.608473000  |
| 1  | 6.487433000  | -1.407261000 | 0.231961000  |
| 6  | -2.633649000 | -0.178311000 | -0.018324000 |
| 6  | -3.027550000 | -1.164696000 | -0.914536000 |
| 6  | -3.515928000 | 0.208779000  | 0.986108000  |
| 6  | -4.277423000 | -1.754756000 | -0.811569000 |
| 1  | -2.347604000 | -1.451659000 | -1.710537000 |
| 6  | -4.762563000 | -0.376790000 | 1.082351000  |
| 1  | -3.214076000 | 0.978642000  | 1.685942000  |
| 6  | -5.149929000 | -1.362174000 | 0.185810000  |
| 1  | -4.568238000 | -2.521082000 | -1.520864000 |
| 1  | -5.440376000 | -0.063581000 | 1.868345000  |
| 1  | -6.128901000 | -1.819520000 | 0.266949000  |
| 6  | -1.222052000 | 1.664404000  | -0.222178000 |
| 8  | -2.119552000 | 2.474878000  | -0.295049000 |
| 7  | 0.122421000  | 2.218262000  | -0.302792000 |
| 6  | 0.141816000  | 3.665011000  | -0.485149000 |
| 1  | -0.381938000 | 3.941040000  | -1.399131000 |
| 1  | -0.358864000 | 4.160137000  | 0.345387000  |
| 1  | 1.175021000  | 4.002554000  | -0.541863000 |
| 31 | -0.008900000 | -1.238785000 | 0.223885000  |

**5Ga-T** (T.E = -2743.743235)

|   |              |              |              |
|---|--------------|--------------|--------------|
| 7 | 1.503966000  | 0.255266000  | -0.036379000 |
| 6 | 1.211133000  | 1.512703000  | -0.465106000 |
| 7 | -1.394794000 | 0.358361000  | 0.002598000  |
| 1 | 1.872504000  | 2.010094000  | -1.167068000 |
| 6 | 2.811352000  | -0.235677000 | -0.087555000 |

|    |              |              |              |
|----|--------------|--------------|--------------|
| 6  | 3.020753000  | -1.614476000 | -0.119277000 |
| 6  | 3.921126000  | 0.608856000  | -0.110732000 |
| 6  | 4.296781000  | -2.134561000 | -0.163974000 |
| 1  | 2.157292000  | -2.277169000 | -0.123260000 |
| 6  | 5.197493000  | 0.079726000  | -0.175610000 |
| 1  | 3.776929000  | 1.681268000  | -0.049061000 |
| 6  | 5.397087000  | -1.289502000 | -0.201525000 |
| 1  | 4.435473000  | -3.209302000 | -0.182807000 |
| 1  | 6.048691000  | 0.750987000  | -0.192601000 |
| 1  | 6.399316000  | -1.697290000 | -0.248780000 |
| 6  | -2.646552000 | -0.281834000 | -0.115021000 |
| 6  | -2.651368000 | -1.565211000 | -0.659545000 |
| 6  | -3.850246000 | 0.259750000  | 0.329966000  |
| 6  | -3.819680000 | -2.296474000 | -0.754026000 |
| 1  | -1.717540000 | -1.977008000 | -1.036984000 |
| 6  | -5.018578000 | -0.473447000 | 0.219293000  |
| 1  | -3.863284000 | 1.255194000  | 0.748741000  |
| 6  | -5.014654000 | -1.750199000 | -0.316409000 |
| 1  | -3.796699000 | -3.292024000 | -1.181773000 |
| 1  | -5.947972000 | -0.037429000 | 0.567803000  |
| 1  | -5.935606000 | -2.315615000 | -0.393053000 |
| 6  | -1.264749000 | 1.728703000  | -0.109142000 |
| 8  | -2.186904000 | 2.503515000  | -0.211021000 |
| 7  | 0.060780000  | 2.201115000  | -0.082724000 |
| 6  | 0.206887000  | 3.647356000  | -0.142782000 |
| 1  | 0.271887000  | 4.001735000  | -1.177258000 |
| 1  | -0.654867000 | 4.119342000  | 0.320413000  |
| 1  | 1.115941000  | 3.931970000  | 0.387458000  |
| 31 | 0.043961000  | -0.640334000 | 0.756794000  |

**6Ga-S (T.E = -2956.616610)**

|    |              |              |              |
|----|--------------|--------------|--------------|
| 6  | -1.461689000 | 1.382630000  | -0.109544000 |
| 6  | -1.460961000 | -0.021180000 | -0.008435000 |
| 6  | 1.040163000  | 1.569449000  | -0.195170000 |
| 1  | 1.826003000  | 2.329788000  | -0.262096000 |
| 7  | 1.386205000  | 0.331056000  | -0.124838000 |
| 15 | -3.080240000 | -0.565989000 | 0.105239000  |
| 6  | -4.014717000 | 0.007535000  | 1.543897000  |
| 1  | -4.060093000 | 1.095287000  | 1.518180000  |
| 1  | -5.024557000 | -0.408383000 | 1.537930000  |
| 1  | -3.497159000 | -0.310360000 | 2.449986000  |
| 6  | -4.143699000 | -0.199747000 | -1.311289000 |
| 1  | -3.707720000 | -0.648798000 | -2.204715000 |
| 1  | -5.146390000 | -0.603224000 | -1.154605000 |
| 1  | -4.192689000 | 0.880629000  | -1.438939000 |
| 6  | -3.146420000 | -2.363630000 | 0.238727000  |
| 1  | -2.606282000 | -2.699742000 | 1.124942000  |
| 1  | -4.188370000 | -2.681260000 | 0.311051000  |

|    |              |              |              |
|----|--------------|--------------|--------------|
| 1  | -2.690044000 | -2.827417000 | -0.636944000 |
| 8  | -2.445404000 | 2.130667000  | -0.123824000 |
| 7  | -0.193970000 | 2.088876000  | -0.215041000 |
| 6  | -0.316662000 | 3.533405000  | -0.348246000 |
| 1  | -0.881095000 | 3.788732000  | -1.244493000 |
| 1  | -0.849442000 | 3.951622000  | 0.504759000  |
| 1  | 0.677592000  | 3.973054000  | -0.409208000 |
| 6  | 2.767553000  | 0.059761000  | -0.032876000 |
| 6  | 3.319301000  | -0.930948000 | -0.838740000 |
| 6  | 3.584655000  | 0.729042000  | 0.872993000  |
| 6  | 4.667495000  | -1.222761000 | -0.758019000 |
| 1  | 2.675577000  | -1.461564000 | -1.531148000 |
| 6  | 4.934784000  | 0.432987000  | 0.948163000  |
| 1  | 3.148428000  | 1.463082000  | 1.542264000  |
| 6  | 5.482542000  | -0.540823000 | 0.131894000  |
| 1  | 5.086128000  | -1.991434000 | -1.397303000 |
| 1  | 5.558660000  | 0.959140000  | 1.661615000  |
| 1  | 6.538182000  | -0.776133000 | 0.195720000  |
| 31 | 0.040012000  | -1.423947000 | 0.013678000  |

**6Ga-T (T.E = -2956.545740)**

|    |              |              |              |
|----|--------------|--------------|--------------|
| 6  | -1.480929000 | 1.385438000  | -0.097793000 |
| 6  | -1.515546000 | -0.052293000 | 0.022247000  |
| 6  | 1.029635000  | 1.623916000  | -0.067990000 |
| 1  | 1.763040000  | 2.377792000  | -0.334262000 |
| 7  | 1.409680000  | 0.312007000  | -0.152123000 |
| 15 | -3.095959000 | -0.678493000 | 0.124061000  |
| 6  | -4.059147000 | -0.139616000 | 1.552063000  |
| 1  | -4.161975000 | 0.943702000  | 1.509713000  |
| 1  | -5.044804000 | -0.609965000 | 1.547955000  |
| 1  | -3.527186000 | -0.414558000 | 2.463584000  |
| 6  | -4.167500000 | -0.384033000 | -1.299142000 |
| 1  | -3.703787000 | -0.814198000 | -2.187776000 |
| 1  | -5.147781000 | -0.839344000 | -1.142433000 |
| 1  | -4.271734000 | 0.691551000  | -1.434348000 |
| 6  | -3.020560000 | -2.472757000 | 0.273392000  |
| 1  | -2.451846000 | -2.750159000 | 1.161981000  |
| 1  | -4.030958000 | -2.877365000 | 0.353622000  |
| 1  | -2.532566000 | -2.902101000 | -0.602753000 |
| 8  | -2.555847000 | 2.006578000  | -0.126699000 |
| 7  | -0.287901000 | 2.078545000  | -0.176600000 |
| 6  | -0.368157000 | 3.525969000  | -0.275879000 |
| 1  | -1.412219000 | 3.818066000  | -0.318806000 |
| 1  | 0.105144000  | 3.990552000  | 0.593609000  |
| 1  | 0.146745000  | 3.870355000  | -1.176618000 |
| 6  | 2.764978000  | 0.005504000  | -0.036290000 |
| 6  | 3.236657000  | -1.219799000 | -0.521801000 |
| 6  | 3.690532000  | 0.876212000  | 0.548245000  |

|    |             |              |              |
|----|-------------|--------------|--------------|
| 6  | 4.565913000 | -1.566613000 | -0.413487000 |
| 1  | 2.537962000 | -1.893644000 | -1.012465000 |
| 6  | 5.025590000 | 0.522048000  | 0.643103000  |
| 1  | 3.350709000 | 1.815038000  | 0.968126000  |
| 6  | 5.478278000 | -0.695239000 | 0.167673000  |
| 1  | 4.898601000 | -2.522730000 | -0.801872000 |
| 1  | 5.720782000 | 1.212499000  | 1.108456000  |
| 1  | 6.525122000 | -0.962838000 | 0.242585000  |
| 31 | 0.102968000 | -1.070780000 | -0.079052000 |

**7Ga-S (T.E = -3069.382359)**

|    |              |              |              |
|----|--------------|--------------|--------------|
| 7  | 0.785281000  | 0.024414000  | -0.145057000 |
| 6  | 0.838022000  | 1.404203000  | -0.488114000 |
| 6  | -0.319384000 | 2.157861000  | -0.694529000 |
| 6  | -1.602926000 | 1.663472000  | -0.578307000 |
| 7  | -1.997894000 | 0.432564000  | -0.284334000 |
| 1  | -0.206396000 | 3.200573000  | -0.963684000 |
| 1  | -2.398337000 | 2.389364000  | -0.775823000 |
| 15 | 2.433788000  | 0.097076000  | -0.033685000 |
| 6  | 2.202026000  | 1.728612000  | -0.531933000 |
| 6  | 2.921101000  | 3.001535000  | -0.765823000 |
| 1  | 2.362809000  | 3.631465000  | -1.464117000 |
| 1  | 3.074802000  | 3.597061000  | 0.143967000  |
| 1  | 3.905877000  | 2.838500000  | -1.209825000 |
| 6  | -3.373066000 | 0.207762000  | -0.125294000 |
| 6  | -3.940353000 | -0.959708000 | -0.636309000 |
| 6  | -4.197166000 | 1.093966000  | 0.569777000  |
| 6  | -5.287168000 | -1.222568000 | -0.470751000 |
| 1  | -3.310104000 | -1.650953000 | -1.185632000 |
| 6  | -5.546009000 | 0.830379000  | 0.723969000  |
| 1  | -3.763516000 | 1.982567000  | 1.015626000  |
| 6  | -6.100556000 | -0.328008000 | 0.205652000  |
| 1  | -5.707141000 | -2.133106000 | -0.883129000 |
| 1  | -6.167141000 | 1.531949000  | 1.269811000  |
| 1  | -7.156338000 | -0.535054000 | 0.333161000  |
| 31 | -0.757703000 | -1.231181000 | 0.232799000  |
| 7  | 3.097381000  | -0.141197000 | 1.467609000  |
| 7  | 3.146805000  | -1.093998000 | -0.934573000 |
| 6  | 2.928070000  | -1.448162000 | 2.086963000  |
| 1  | 2.989645000  | -2.240636000 | 1.342323000  |
| 1  | 3.712220000  | -1.606091000 | 2.832376000  |
| 1  | 1.952390000  | -1.525385000 | 2.585928000  |
| 6  | 2.945022000  | 0.942471000  | 2.424828000  |
| 1  | 3.170625000  | 1.900486000  | 1.960044000  |
| 1  | 1.925267000  | 0.984081000  | 2.831874000  |
| 1  | 3.639270000  | 0.783985000  | 3.253659000  |
| 6  | 4.569977000  | -1.361675000 | -0.867184000 |
| 1  | 4.748362000  | -2.433763000 | -0.996905000 |

|   |             |              |              |
|---|-------------|--------------|--------------|
| 1 | 5.114876000 | -0.831633000 | -1.658588000 |
| 1 | 4.975624000 | -1.056966000 | 0.095782000  |
| 6 | 2.569215000 | -1.406443000 | -2.229893000 |
| 1 | 1.497950000 | -1.211530000 | -2.222646000 |
| 1 | 3.030804000 | -0.813618000 | -3.029078000 |
| 1 | 2.728569000 | -2.465512000 | -2.450437000 |

**7Ga-T (T.E = -3069.302507)**

|    |              |              |              |
|----|--------------|--------------|--------------|
| 7  | 0.827692000  | 0.028656000  | -0.341377000 |
| 6  | 0.792443000  | 1.476602000  | -0.442042000 |
| 6  | -0.329261000 | 2.236024000  | -0.552359000 |
| 6  | -1.660370000 | 1.773325000  | -0.548358000 |
| 7  | -2.013464000 | 0.471981000  | -0.335101000 |
| 1  | -0.180991000 | 3.307006000  | -0.657850000 |
| 1  | -2.447088000 | 2.484359000  | -0.782893000 |
| 15 | 2.423749000  | 0.072548000  | -0.045716000 |
| 6  | 2.200428000  | 1.798072000  | -0.299607000 |
| 6  | 2.927851000  | 3.073557000  | -0.318589000 |
| 1  | 2.795063000  | 3.598929000  | -1.271518000 |
| 1  | 2.553891000  | 3.752056000  | 0.459786000  |
| 1  | 3.998222000  | 2.937917000  | -0.156289000 |
| 6  | -3.362158000 | 0.194519000  | -0.170495000 |
| 6  | -3.867667000 | -1.054918000 | -0.562546000 |
| 6  | -4.265652000 | 1.109098000  | 0.394657000  |
| 6  | -5.197974000 | -1.375471000 | -0.385122000 |
| 1  | -3.199582000 | -1.759342000 | -1.046735000 |
| 6  | -5.595688000 | 0.780531000  | 0.562421000  |
| 1  | -3.897932000 | 2.067096000  | 0.743003000  |
| 6  | -6.077142000 | -0.461456000 | 0.176516000  |
| 1  | -5.557283000 | -2.346815000 | -0.706679000 |
| 1  | -6.266930000 | 1.503434000  | 1.013848000  |
| 1  | -7.123231000 | -0.711388000 | 0.306577000  |
| 31 | -0.796421000 | -1.144310000 | 0.208906000  |
| 7  | 3.013568000  | -0.316748000 | 1.458839000  |
| 7  | 3.291474000  | -0.918016000 | -1.035935000 |
| 6  | 2.963208000  | -1.710039000 | 1.885053000  |
| 1  | 3.159947000  | -2.380022000 | 1.049596000  |
| 1  | 3.717276000  | -1.884005000 | 2.657396000  |
| 1  | 1.976855000  | -1.961785000 | 2.296409000  |
| 6  | 2.651784000  | 0.591874000  | 2.537286000  |
| 1  | 2.787083000  | 1.629011000  | 2.231185000  |
| 1  | 1.607897000  | 0.454535000  | 2.851219000  |
| 1  | 3.298813000  | 0.399686000  | 3.396156000  |
| 6  | 4.710099000  | -1.168388000 | -0.878754000 |
| 1  | 4.917452000  | -2.238395000 | -0.987128000 |
| 1  | 5.286572000  | -0.635492000 | -1.643756000 |
| 1  | 5.053688000  | -0.846424000 | 0.102441000  |
| 6  | 2.785334000  | -1.238934000 | -2.358713000 |

|   |             |              |              |
|---|-------------|--------------|--------------|
| 1 | 1.718493000 | -1.030227000 | -2.412893000 |
| 1 | 3.303780000 | -0.660164000 | -3.131750000 |
| 1 | 2.944530000 | -2.302083000 | -2.561562000 |

**8Ga-S** (T.E = -3190.659332)

|    |              |              |              |
|----|--------------|--------------|--------------|
| 7  | 1.481236000  | 0.408018000  | -1.054030000 |
| 6  | 1.058279000  | 1.514652000  | -0.281124000 |
| 6  | -0.030784000 | 2.357978000  | -0.764711000 |
| 15 | 2.396413000  | 0.016438000  | 0.266699000  |
| 6  | 1.734475000  | 1.493538000  | 0.916609000  |
| 6  | 1.686659000  | 2.352276000  | 2.120726000  |
| 1  | 2.637917000  | 2.848696000  | 2.334737000  |
| 1  | 0.935912000  | 3.136132000  | 1.983546000  |
| 1  | 1.406131000  | 1.800522000  | 3.024352000  |
| 7  | 2.036718000  | -1.342187000 | 1.131176000  |
| 7  | 3.975497000  | -0.203411000 | -0.155292000 |
| 6  | 2.327241000  | -2.654768000 | 0.573771000  |
| 1  | 1.464958000  | -3.042989000 | 0.015600000  |
| 1  | 3.178714000  | -2.608894000 | -0.103529000 |
| 1  | 2.558833000  | -3.352676000 | 1.383560000  |
| 6  | 0.845875000  | -1.348457000 | 1.968115000  |
| 1  | 0.976353000  | -2.081873000 | 2.768048000  |
| 1  | 0.682164000  | -0.368756000 | 2.413363000  |
| 1  | -0.053646000 | -1.616734000 | 1.397513000  |
| 6  | 4.975100000  | -0.591056000 | 0.819903000  |
| 1  | 5.693637000  | -1.277125000 | 0.360358000  |
| 1  | 5.529290000  | 0.280040000  | 1.190451000  |
| 1  | 4.513038000  | -1.093909000 | 1.668193000  |
| 6  | 4.516853000  | 0.540869000  | -1.278449000 |
| 1  | 3.722663000  | 0.774973000  | -1.984780000 |
| 1  | 4.990870000  | 1.473708000  | -0.949036000 |
| 1  | 5.273151000  | -0.066716000 | -1.783436000 |
| 6  | -2.396808000 | -0.648471000 | -0.104875000 |
| 6  | -2.624677000 | -0.615280000 | 1.278693000  |
| 6  | -3.086752000 | -1.620034000 | -0.841025000 |
| 6  | -3.509480000 | -1.485897000 | 1.884748000  |
| 1  | -2.093056000 | 0.127835000  | 1.867579000  |
| 6  | -3.961226000 | -2.500327000 | -0.226900000 |
| 1  | -2.946322000 | -1.654780000 | -1.916699000 |
| 6  | -4.184131000 | -2.440968000 | 1.138169000  |
| 1  | -3.670843000 | -1.422206000 | 2.955795000  |
| 1  | -4.483902000 | -3.235510000 | -0.829322000 |
| 1  | -4.874672000 | -3.126336000 | 1.614725000  |
| 7  | -1.471238000 | 0.201380000  | -0.700229000 |
| 5  | -1.436152000 | 1.601489000  | -0.484808000 |
| 7  | -2.566032000 | 2.399105000  | -0.113934000 |
| 6  | -3.932314000 | 1.953385000  | -0.255498000 |
| 1  | -3.993482000 | 1.051083000  | -0.859909000 |

|    |              |              |              |
|----|--------------|--------------|--------------|
| 1  | -4.403969000 | 1.743531000  | 0.714574000  |
| 1  | -4.526987000 | 2.732274000  | -0.749280000 |
| 6  | -2.517859000 | 3.724683000  | 0.445369000  |
| 1  | -1.501509000 | 4.028669000  | 0.689456000  |
| 1  | -2.946070000 | 4.474274000  | -0.234889000 |
| 1  | -3.100694000 | 3.768282000  | 1.375309000  |
| 1  | 0.012640000  | 3.350471000  | -0.317926000 |
| 1  | 0.063718000  | 2.476341000  | -1.850477000 |
| 31 | -0.109878000 | -0.896949000 | -1.802235000 |

**8Ga-T (T.E = -3190.568204)**

|    |              |              |              |
|----|--------------|--------------|--------------|
| 7  | -1.399134000 | -1.008292000 | -0.709884000 |
| 6  | -0.862048000 | -1.553599000 | 0.493300000  |
| 6  | 0.317670000  | -2.424103000 | 0.458900000  |
| 15 | -2.296065000 | -0.014324000 | 0.286626000  |
| 6  | -1.546718000 | -0.984642000 | 1.535258000  |
| 6  | -1.517574000 | -1.178438000 | 3.001500000  |
| 1  | -2.468702000 | -1.545915000 | 3.397724000  |
| 1  | -0.752241000 | -1.911077000 | 3.268489000  |
| 1  | -1.282828000 | -0.255954000 | 3.541920000  |
| 7  | -1.978640000 | 1.586412000  | 0.403767000  |
| 7  | -3.880629000 | -0.077159000 | -0.152212000 |
| 6  | -2.312835000 | 2.490319000  | -0.688845000 |
| 1  | -1.422108000 | 2.676371000  | -1.302653000 |
| 1  | -3.080745000 | 2.060872000  | -1.331160000 |
| 1  | -2.680051000 | 3.436847000  | -0.278132000 |
| 6  | -0.863989000 | 2.079724000  | 1.203468000  |
| 1  | -1.153491000 | 3.025151000  | 1.671089000  |
| 1  | -0.593369000 | 1.366422000  | 1.979231000  |
| 1  | 0.017571000  | 2.250677000  | 0.573591000  |
| 6  | -4.895642000 | 0.772207000  | 0.436643000  |
| 1  | -5.548251000 | 1.172301000  | -0.346603000 |
| 1  | -5.518741000 | 0.208236000  | 1.140379000  |
| 1  | -4.442241000 | 1.607421000  | 0.967415000  |
| 6  | -4.413455000 | -1.265531000 | -0.794426000 |
| 1  | -3.605150000 | -1.844922000 | -1.235896000 |
| 1  | -4.957430000 | -1.892004000 | -0.077952000 |
| 1  | -5.108617000 | -0.970583000 | -1.586010000 |
| 6  | 2.161493000  | 0.883464000  | -0.092793000 |
| 6  | 2.809889000  | 0.964726000  | 1.151515000  |
| 6  | 2.216467000  | 2.016535000  | -0.919890000 |
| 6  | 3.432489000  | 2.127433000  | 1.558191000  |
| 1  | 2.776486000  | 0.103239000  | 1.812480000  |
| 6  | 2.844883000  | 3.175949000  | -0.502584000 |
| 1  | 1.746896000  | 1.964374000  | -1.898851000 |
| 6  | 3.453262000  | 3.249191000  | 0.739522000  |
| 1  | 3.901893000  | 2.162115000  | 2.535688000  |
| 1  | 2.865284000  | 4.033798000  | -1.166420000 |



|    |             |              |              |
|----|-------------|--------------|--------------|
| 1  | 3.947179000 | 4.158085000  | 1.060716000  |
| 7  | 1.428722000 | -0.222315000 | -0.434141000 |
| 5  | 1.627830000 | -1.590795000 | -0.007673000 |
| 7  | 2.889707000 | -2.227502000 | 0.025601000  |
| 6  | 4.080794000 | -1.641195000 | -0.542710000 |
| 1  | 3.843425000 | -0.727013000 | -1.082516000 |
| 1  | 4.821131000 | -1.401463000 | 0.231101000  |
| 1  | 4.547177000 | -2.342866000 | -1.244210000 |
| 6  | 3.132907000 | -3.553636000 | 0.531060000  |
| 1  | 2.241016000 | -3.979400000 | 0.986654000  |
| 1  | 3.458252000 | -4.228666000 | -0.271087000 |
| 1  | 3.927705000 | -3.543954000 | 1.287723000  |
| 1  | 0.469211000 | -2.875908000 | 1.444826000  |
| 1  | 0.151857000 | -3.233929000 | -0.263369000 |
| 31 | 0.082418000 | -0.277802000 | -1.852122000 |

**9Ga-S (T.E = -3360.084922)**

|    |              |              |              |
|----|--------------|--------------|--------------|
| 7  | 0.988181000  | 0.086189000  | -0.105024000 |
| 6  | 1.177844000  | 1.506612000  | -0.211731000 |
| 6  | 0.102286000  | 2.386934000  | -0.303763000 |
| 1  | 0.310645000  | 3.447709000  | -0.400778000 |
| 15 | 2.630833000  | -0.020687000 | -0.001525000 |
| 6  | 2.568693000  | 1.687443000  | -0.191692000 |
| 6  | 3.413373000  | 2.901853000  | -0.223604000 |
| 1  | 4.247704000  | 2.819009000  | -0.925914000 |
| 1  | 2.813434000  | 3.757198000  | -0.546262000 |
| 1  | 3.842870000  | 3.167199000  | 0.751116000  |
| 7  | 3.281303000  | -0.592995000 | 1.415225000  |
| 7  | 3.242211000  | -1.080318000 | -1.120640000 |
| 6  | 3.054758000  | -1.984811000 | 1.775214000  |
| 1  | 2.083776000  | -2.112308000 | 2.273185000  |
| 1  | 3.064587000  | -2.621541000 | 0.891947000  |
| 1  | 3.840421000  | -2.319571000 | 2.458503000  |
| 6  | 3.191190000  | 0.289282000  | 2.566688000  |
| 1  | 3.890510000  | -0.052795000 | 3.333733000  |
| 1  | 3.448470000  | 1.310052000  | 2.289700000  |
| 1  | 2.180199000  | 0.290731000  | 2.997473000  |
| 6  | 4.644495000  | -1.446694000 | -1.137122000 |
| 1  | 4.750288000  | -2.482916000 | -1.473806000 |
| 1  | 5.216793000  | -0.809872000 | -1.824052000 |
| 1  | 5.079423000  | -1.359306000 | -0.143180000 |
| 6  | 2.638477000  | -1.097135000 | -2.440669000 |
| 1  | 1.585421000  | -0.827605000 | -2.377202000 |
| 1  | 3.140955000  | -0.398691000 | -3.121706000 |
| 1  | 2.715660000  | -2.103725000 | -2.861193000 |
| 6  | -3.275502000 | -0.205920000 | 0.005709000  |
| 6  | -4.126920000 | 0.192814000  | 1.038585000  |
| 6  | -3.767801000 | -1.119414000 | -0.929452000 |

|    |              |              |              |
|----|--------------|--------------|--------------|
| 6  | -5.423335000 | -0.281935000 | 1.117995000  |
| 1  | -3.744694000 | 0.872866000  | 1.794133000  |
| 6  | -5.062267000 | -1.598860000 | -0.841703000 |
| 1  | -3.115147000 | -1.437428000 | -1.735907000 |
| 6  | -5.901025000 | -1.180682000 | 0.178079000  |
| 1  | -6.063443000 | 0.046710000  | 1.929349000  |
| 1  | -5.420031000 | -2.305420000 | -1.582440000 |
| 1  | -6.915379000 | -1.555565000 | 0.243325000  |
| 7  | -1.953485000 | 0.245009000  | -0.077810000 |
| 14 | -1.546307000 | 1.835457000  | -0.247488000 |
| 6  | -2.902160000 | 3.087693000  | -0.411648000 |
| 1  | -3.705908000 | 2.702950000  | -1.041989000 |
| 1  | -3.338957000 | 3.327646000  | 0.559347000  |
| 1  | -2.509798000 | 4.007271000  | -0.847652000 |
| 31 | -0.519745000 | -1.296031000 | 0.068400000  |

**9Ga-T (T.E = -3360.013882)**

|    |              |              |              |
|----|--------------|--------------|--------------|
| 7  | 1.043624000  | 0.143932000  | -0.424794000 |
| 6  | 1.082153000  | 1.547183000  | -0.056332000 |
| 6  | 0.031235000  | 2.395317000  | -0.153243000 |
| 1  | 0.195726000  | 3.423978000  | 0.161592000  |
| 15 | 2.587841000  | -0.019825000 | 0.049085000  |
| 6  | 2.431577000  | 1.711538000  | 0.384365000  |
| 6  | 3.203235000  | 2.887036000  | 0.810720000  |
| 1  | 3.888200000  | 3.238518000  | 0.030722000  |
| 1  | 2.531600000  | 3.714824000  | 1.050393000  |
| 1  | 3.815383000  | 2.677886000  | 1.693558000  |
| 7  | 2.988123000  | -0.902224000 | 1.388631000  |
| 7  | 3.554341000  | -0.641603000 | -1.125261000 |
| 6  | 3.007904000  | -2.357983000 | 1.325070000  |
| 1  | 2.019641000  | -2.773849000 | 1.556411000  |
| 1  | 3.289770000  | -2.699619000 | 0.330699000  |
| 1  | 3.732016000  | -2.743763000 | 2.048115000  |
| 6  | 2.489228000  | -0.415461000 | 2.666750000  |
| 1  | 3.080700000  | -0.857396000 | 3.471825000  |
| 1  | 2.576442000  | 0.668690000  | 2.730490000  |
| 1  | 1.436562000  | -0.688408000 | 2.817732000  |
| 6  | 4.965639000  | -0.901663000 | -0.925807000 |
| 1  | 5.223448000  | -1.896257000 | -1.304916000 |
| 1  | 5.575906000  | -0.167351000 | -1.463634000 |
| 1  | 5.222132000  | -0.859179000 | 0.131666000  |
| 6  | 3.149433000  | -0.610012000 | -2.519846000 |
| 1  | 2.082966000  | -0.407320000 | -2.595394000 |
| 1  | 3.701064000  | 0.158613000  | -3.072572000 |
| 1  | 3.356956000  | -1.580238000 | -2.980812000 |
| 6  | -3.180518000 | -0.237648000 | -0.048143000 |
| 6  | -3.852125000 | -0.001936000 | 1.154513000  |
| 6  | -3.843662000 | -0.974020000 | -1.032573000 |

|    |              |              |              |
|----|--------------|--------------|--------------|
| 6  | -5.134731000 | -0.475449000 | 1.358343000  |
| 1  | -3.337199000 | 0.557783000  | 1.928598000  |
| 6  | -5.127340000 | -1.448846000 | -0.823995000 |
| 1  | -3.329165000 | -1.157717000 | -1.970511000 |
| 6  | -5.782347000 | -1.201349000 | 0.370182000  |
| 1  | -5.632998000 | -0.279899000 | 2.301747000  |
| 1  | -5.620018000 | -2.017476000 | -1.605188000 |
| 1  | -6.787139000 | -1.573199000 | 0.532467000  |
| 7  | -1.867601000 | 0.218998000  | -0.242257000 |
| 14 | -1.636184000 | 1.832752000  | -0.793555000 |
| 6  | -2.935720000 | 3.027300000  | -0.133757000 |
| 1  | -3.940094000 | 2.731399000  | -0.440266000 |
| 1  | -2.911993000 | 3.067804000  | 0.959771000  |
| 1  | -2.744888000 | 4.031113000  | -0.519448000 |
| 31 | -0.528685000 | -1.268641000 | -0.221008000 |

**10Ga-S (T.E = -3282.154071)**

|    |              |              |              |
|----|--------------|--------------|--------------|
| 7  | -0.644888000 | 0.055571000  | 0.137875000  |
| 6  | -0.675652000 | 1.476300000  | 0.221998000  |
| 6  | 0.477023000  | 2.252597000  | 0.255908000  |
| 6  | 1.766032000  | 1.730837000  | 0.191032000  |
| 1  | 0.350374000  | 3.327100000  | 0.332395000  |
| 1  | 2.538814000  | 2.508408000  | 0.241253000  |
| 15 | -2.293145000 | 0.128857000  | 0.045283000  |
| 6  | -2.047964000 | 1.812504000  | 0.231308000  |
| 6  | -2.752071000 | 3.114581000  | 0.187262000  |
| 1  | -2.535311000 | 3.738484000  | 1.061585000  |
| 1  | -2.488737000 | 3.709040000  | -0.698384000 |
| 1  | -3.835372000 | 2.973565000  | 0.164180000  |
| 6  | 2.163775000  | 0.406789000  | 0.068161000  |
| 15 | 3.810586000  | 0.025136000  | -0.004532000 |
| 6  | 4.998495000  | 1.390048000  | 0.102241000  |
| 1  | 6.016496000  | 1.000525000  | 0.043401000  |
| 1  | 4.837448000  | 2.091090000  | -0.717668000 |
| 1  | 4.873873000  | 1.920800000  | 1.046909000  |
| 6  | 4.259016000  | -0.851397000 | -1.521837000 |
| 1  | 5.304121000  | -1.168629000 | -1.508800000 |
| 1  | 3.613196000  | -1.727652000 | -1.615137000 |
| 1  | 4.080666000  | -0.200457000 | -2.378497000 |
| 6  | 4.319836000  | -1.126349000 | 1.293531000  |
| 1  | 4.183622000  | -0.653842000 | 2.266939000  |
| 1  | 3.673063000  | -2.005547000 | 1.244386000  |
| 1  | 5.361350000  | -1.432514000 | 1.172681000  |
| 31 | 0.855808000  | -1.270906000 | -0.060063000 |
| 7  | -3.002329000 | -0.378278000 | -1.369766000 |
| 7  | -3.004279000 | -0.873543000 | 1.163993000  |
| 6  | -2.923224000 | -1.787944000 | -1.723145000 |
| 1  | -1.968334000 | -2.020033000 | -2.214128000 |

|   |              |              |              |
|---|--------------|--------------|--------------|
| 1 | -3.003185000 | -2.413103000 | -0.835298000 |
| 1 | -3.737849000 | -2.040849000 | -2.408185000 |
| 6 | -2.825594000 | 0.485781000  | -2.524020000 |
| 1 | -3.557924000 | 0.214237000  | -3.288928000 |
| 1 | -2.976010000 | 1.528560000  | -2.248551000 |
| 1 | -1.820424000 | 0.383049000  | -2.956772000 |
| 6 | -4.447245000 | -1.001203000 | 1.215863000  |
| 1 | -4.713434000 | -1.980718000 | 1.624868000  |
| 1 | -4.898537000 | -0.233711000 | 1.859820000  |
| 1 | -4.879066000 | -0.913394000 | 0.220121000  |
| 6 | -2.389029000 | -0.941801000 | 2.477358000  |
| 1 | -1.305560000 | -0.879791000 | 2.388927000  |
| 1 | -2.737984000 | -0.130929000 | 3.130518000  |
| 1 | -2.646854000 | -1.896211000 | 2.944375000  |

**10Ga-T (T.E = -3282.078591)**

|    |              |              |              |
|----|--------------|--------------|--------------|
| 7  | 0.688099000  | 0.045076000  | -0.211781000 |
| 6  | 0.613999000  | 1.499353000  | -0.252480000 |
| 6  | -0.537879000 | 2.228827000  | -0.312774000 |
| 6  | -1.855109000 | 1.708733000  | -0.300309000 |
| 1  | -0.411588000 | 3.307722000  | -0.373952000 |
| 1  | -2.646675000 | 2.451112000  | -0.425862000 |
| 15 | 2.295674000  | 0.136842000  | -0.049670000 |
| 6  | 2.001416000  | 1.860614000  | -0.193092000 |
| 6  | 2.690525000  | 3.160866000  | -0.185793000 |
| 1  | 2.448669000  | 3.753280000  | -1.075754000 |
| 1  | 2.394170000  | 3.768907000  | 0.679654000  |
| 1  | 3.775354000  | 3.045442000  | -0.149827000 |
| 6  | -2.153317000 | 0.329526000  | -0.083361000 |
| 15 | -3.813594000 | -0.031857000 | 0.011499000  |
| 6  | -4.784044000 | 0.392215000  | -1.467765000 |
| 1  | -5.847663000 | 0.189096000  | -1.323256000 |
| 1  | -4.645333000 | 1.450837000  | -1.692586000 |
| 1  | -4.409076000 | -0.190115000 | -2.310381000 |
| 6  | -4.700032000 | 0.853659000  | 1.329578000  |
| 1  | -5.768387000 | 0.626725000  | 1.317226000  |
| 1  | -4.273343000 | 0.568113000  | 2.291789000  |
| 1  | -4.556037000 | 1.926630000  | 1.194615000  |
| 6  | -4.185933000 | -1.769169000 | 0.305808000  |
| 1  | -3.799134000 | -2.383263000 | -0.507375000 |
| 1  | -3.722605000 | -2.100424000 | 1.235391000  |
| 1  | -5.269018000 | -1.891513000 | 0.372943000  |
| 31 | -0.847711000 | -1.300630000 | 0.058626000  |
| 7  | 3.019457000  | -0.317050000 | 1.381508000  |
| 7  | 3.116784000  | -0.774975000 | -1.154916000 |
| 6  | 3.013093000  | -1.733406000 | 1.726795000  |
| 1  | 2.052380000  | -2.028450000 | 2.169376000  |
| 1  | 3.174485000  | -2.349321000 | 0.843493000  |

|   |             |              |              |
|---|-------------|--------------|--------------|
| 1 | 3.809794000 | -1.937733000 | 2.447842000  |
| 6 | 2.701866000 | 0.515588000  | 2.531620000  |
| 1 | 3.394815000 | 0.280487000  | 3.343111000  |
| 1 | 2.806381000 | 1.571787000  | 2.284356000  |
| 1 | 1.676691000 | 0.341888000  | 2.887893000  |
| 6 | 4.548987000 | -0.979856000 | -1.123217000 |
| 1 | 4.783548000 | -2.033424000 | -1.312217000 |
| 1 | 5.047904000 | -0.382119000 | -1.895751000 |
| 1 | 4.957272000 | -0.703442000 | -0.152766000 |
| 6 | 2.516520000 | -1.041716000 | -2.448463000 |
| 1 | 1.442486000 | -0.868212000 | -2.405903000 |
| 1 | 2.953174000 | -0.404929000 | -3.227278000 |
| 1 | 2.688662000 | -2.087105000 | -2.722603000 |

**11Ga-S (T.E = -3199.962225)**

|    |              |              |              |
|----|--------------|--------------|--------------|
| 7  | 0.828430000  | -0.155712000 | -0.120853000 |
| 6  | 0.888149000  | 1.243033000  | -0.174606000 |
| 6  | -1.607934000 | 1.589625000  | -0.223464000 |
| 7  | -1.857506000 | 0.280588000  | -0.068178000 |
| 15 | 2.477518000  | -0.129461000 | -0.029907000 |
| 6  | 2.255540000  | 1.576852000  | -0.160940000 |
| 6  | 3.119008000  | 2.788106000  | -0.120318000 |
| 1  | 2.950777000  | 3.471018000  | -0.956334000 |
| 1  | 3.016319000  | 3.372075000  | 0.801590000  |
| 1  | 4.167386000  | 2.483363000  | -0.177760000 |
| 6  | -3.233169000 | -0.062613000 | -0.043537000 |
| 6  | -3.714222000 | -0.994899000 | -0.955216000 |
| 6  | -4.101863000 | 0.435044000  | 0.923699000  |
| 6  | -5.031036000 | -1.423458000 | -0.903573000 |
| 1  | -3.042917000 | -1.372421000 | -1.720002000 |
| 6  | -5.415213000 | 0.011024000  | 0.970172000  |
| 1  | -3.733626000 | 1.164050000  | 1.635718000  |
| 6  | -5.887786000 | -0.921575000 | 0.058128000  |
| 1  | -5.386628000 | -2.150596000 | -1.624827000 |
| 1  | -6.078899000 | 0.410245000  | 1.729101000  |
| 1  | -6.918821000 | -1.252784000 | 0.099620000  |
| 31 | -0.729039000 | -1.432121000 | 0.258922000  |
| 7  | 3.195354000  | -0.665988000 | 1.356720000  |
| 7  | 3.140841000  | -1.094832000 | -1.193486000 |
| 6  | 3.138643000  | -2.085168000 | 1.681252000  |
| 1  | 3.156228000  | -2.689653000 | 0.775848000  |
| 1  | 3.998642000  | -2.353953000 | 2.300491000  |
| 1  | 2.221386000  | -2.325226000 | 2.234014000  |
| 6  | 3.091576000  | 0.177838000  | 2.536374000  |
| 1  | 3.248652000  | 1.223301000  | 2.276957000  |
| 1  | 2.109496000  | 0.080004000  | 3.018015000  |
| 1  | 3.857321000  | -0.122270000 | 3.255595000  |
| 6  | 4.580004000  | -1.264479000 | -1.280662000 |

|   |              |              |              |
|---|--------------|--------------|--------------|
| 1 | 4.807789000  | -2.262962000 | -1.664899000 |
| 1 | 5.028981000  | -0.529311000 | -1.960611000 |
| 1 | 5.042500000  | -1.157666000 | -0.300755000 |
| 6 | 2.480549000  | -1.170850000 | -2.486590000 |
| 1 | 1.401207000  | -1.101182000 | -2.364852000 |
| 1 | 2.814939000  | -0.369907000 | -3.157534000 |
| 1 | 2.718569000  | -2.130885000 | -2.951326000 |
| 8 | -2.423672000 | 2.474926000  | -0.371363000 |
| 7 | -0.206095000 | 2.013955000  | -0.218734000 |
| 6 | 0.024364000  | 3.447745000  | -0.330973000 |
| 1 | 0.639562000  | 3.800700000  | 0.497217000  |
| 1 | 0.521458000  | 3.686196000  | -1.273259000 |
| 1 | -0.940338000 | 3.942695000  | -0.305812000 |

**11Ga-T (T.E = -3199.865868)**

|    |              |              |              |
|----|--------------|--------------|--------------|
| 7  | 0.900406000  | -0.133537000 | -0.647263000 |
| 6  | 0.648542000  | 0.927780000  | 0.382863000  |
| 6  | -1.640633000 | 1.623690000  | -0.127421000 |
| 7  | -1.957023000 | 0.283291000  | -0.064036000 |
| 15 | 2.462484000  | -0.176384000 | -0.067490000 |
| 6  | 1.970822000  | 1.124797000  | 0.920017000  |
| 6  | 2.517783000  | 1.993997000  | 1.984813000  |
| 1  | 2.620572000  | 3.043820000  | 1.687028000  |
| 1  | 1.880750000  | 1.980945000  | 2.877756000  |
| 1  | 3.510804000  | 1.651870000  | 2.289323000  |
| 6  | -3.304020000 | -0.118945000 | -0.138173000 |
| 6  | -3.621250000 | -1.264063000 | -0.864055000 |
| 6  | -4.326218000 | 0.540717000  | 0.542310000  |
| 6  | -4.916825000 | -1.748418000 | -0.902448000 |
| 1  | -2.834710000 | -1.767477000 | -1.420083000 |
| 6  | -5.620426000 | 0.060616000  | 0.490136000  |
| 1  | -4.096911000 | 1.437148000  | 1.102406000  |
| 6  | -5.925980000 | -1.086226000 | -0.226611000 |
| 1  | -5.137345000 | -2.642539000 | -1.474404000 |
| 1  | -6.402758000 | 0.588573000  | 1.023937000  |
| 1  | -6.943416000 | -1.457481000 | -0.259468000 |
| 31 | -0.600881000 | -1.067192000 | 0.222674000  |
| 7  | 3.000000000  | -1.531853000 | 0.715941000  |
| 7  | 3.529292000  | -0.063824000 | -1.340305000 |
| 6  | 3.285567000  | -2.760570000 | -0.004110000 |
| 1  | 3.579348000  | -2.546156000 | -1.029805000 |
| 1  | 4.098628000  | -3.300987000 | 0.489973000  |
| 1  | 2.403077000  | -3.413519000 | -0.023950000 |
| 6  | 2.544574000  | -1.768509000 | 2.073426000  |
| 1  | 2.324895000  | -0.825174000 | 2.572967000  |
| 1  | 1.637344000  | -2.388796000 | 2.088477000  |
| 1  | 3.323844000  | -2.290291000 | 2.636034000  |
| 6  | 4.948599000  | 0.016289000  | -1.033967000 |

|   |              |              |              |
|---|--------------|--------------|--------------|
| 1 | 5.526165000  | -0.246653000 | -1.923827000 |
| 1 | 5.239275000  | 1.031654000  | -0.729116000 |
| 1 | 5.213757000  | -0.673479000 | -0.233964000 |
| 6 | 3.146090000  | 0.843189000  | -2.412591000 |
| 1 | 2.081027000  | 0.751982000  | -2.619366000 |
| 1 | 3.367391000  | 1.888319000  | -2.154685000 |
| 1 | 3.705476000  | 0.583542000  | -3.314422000 |
| 8 | -2.430317000 | 2.506661000  | -0.390473000 |
| 7 | -0.293860000 | 1.912062000  | 0.106538000  |
| 6 | 0.136512000  | 3.292630000  | 0.025159000  |
| 1 | 0.346951000  | 3.713600000  | 1.013061000  |
| 1 | 1.041978000  | 3.362498000  | -0.583868000 |
| 1 | -0.664074000 | 3.869205000  | -0.432979000 |

**12Ga-S (T.E = -3412.741359)**

|    |              |              |              |
|----|--------------|--------------|--------------|
| 7  | 0.754416000  | -0.151684000 | -0.241189000 |
| 6  | 0.695257000  | 1.238702000  | -0.090723000 |
| 6  | -1.806322000 | 1.348956000  | -0.115715000 |
| 15 | 2.381456000  | -0.011871000 | -0.017318000 |
| 6  | 2.026638000  | 1.672369000  | 0.079422000  |
| 6  | 2.762797000  | 2.920623000  | 0.415724000  |
| 1  | 2.839240000  | 3.631861000  | -0.413149000 |
| 1  | 2.332788000  | 3.459841000  | 1.266065000  |
| 1  | 3.789380000  | 2.666048000  | 0.696562000  |
| 6  | -1.991925000 | -0.048242000 | -0.033562000 |
| 15 | -3.665339000 | -0.376816000 | 0.025438000  |
| 6  | -4.571642000 | 0.308577000  | 1.436026000  |
| 1  | -5.626531000 | 0.029012000  | 1.391316000  |
| 1  | -4.132792000 | -0.079212000 | 2.356417000  |
| 1  | -4.473060000 | 1.392879000  | 1.419425000  |
| 6  | -3.968305000 | -2.150978000 | 0.154248000  |
| 1  | -5.043920000 | -2.331390000 | 0.204655000  |
| 1  | -3.554693000 | -2.670641000 | -0.710989000 |
| 1  | -3.491602000 | -2.551256000 | 1.050061000  |
| 6  | -4.645345000 | 0.113310000  | -1.417287000 |
| 1  | -4.558686000 | 1.191065000  | -1.546492000 |
| 1  | -4.244382000 | -0.387931000 | -2.299431000 |
| 1  | -5.693698000 | -0.164479000 | -1.287113000 |
| 31 | -0.668583000 | -1.627219000 | -0.063744000 |
| 7  | 3.068533000  | -0.681041000 | 1.328336000  |
| 7  | 3.217436000  | -0.724966000 | -1.255724000 |
| 6  | 3.246964000  | -2.124243000 | 1.414320000  |
| 1  | 2.342323000  | -2.610687000 | 1.800241000  |
| 1  | 3.463006000  | -2.543992000 | 0.433918000  |
| 1  | 4.079985000  | -2.346302000 | 2.087233000  |
| 6  | 2.719530000  | -0.090807000 | 2.610382000  |
| 1  | 3.476248000  | -0.367452000 | 3.348694000  |
| 1  | 2.682937000  | 0.994964000  | 2.536047000  |

|   |              |              |              |
|---|--------------|--------------|--------------|
| 1 | 1.743579000  | -0.449315000 | 2.964471000  |
| 6 | 4.657680000  | -0.544932000 | -1.298003000 |
| 1 | 5.113549000  | -1.367074000 | -1.856518000 |
| 1 | 4.931684000  | 0.397062000  | -1.793216000 |
| 1 | 5.075477000  | -0.539823000 | -0.291465000 |
| 6 | 2.607221000  | -0.716703000 | -2.575257000 |
| 1 | 1.548923000  | -0.959669000 | -2.502075000 |
| 1 | 2.716008000  | 0.258684000  | -3.068509000 |
| 1 | 3.098995000  | -1.471477000 | -3.193585000 |
| 7 | -0.458232000 | 1.918177000  | -0.125039000 |
| 6 | -0.367488000 | 3.369358000  | -0.099124000 |
| 1 | -0.242348000 | 3.747105000  | 0.919226000  |
| 1 | 0.474508000  | 3.695305000  | -0.707706000 |
| 1 | -1.290937000 | 3.774031000  | -0.500562000 |
| 8 | -2.704637000 | 2.197198000  | -0.159584000 |

**12Ga-T (T.E = -3412.652663)**

|    |              |              |              |
|----|--------------|--------------|--------------|
| 7  | 0.771432000  | -0.049631000 | -0.607776000 |
| 6  | 0.630488000  | 1.208797000  | 0.077410000  |
| 6  | -1.847814000 | 1.354937000  | -0.102866000 |
| 15 | 2.356930000  | 0.012986000  | -0.132020000 |
| 6  | 1.932326000  | 1.577893000  | 0.450709000  |
| 6  | 2.565321000  | 2.662432000  | 1.245428000  |
| 1  | 2.470629000  | 3.651413000  | 0.789060000  |
| 1  | 2.159120000  | 2.735220000  | 2.261634000  |
| 1  | 3.636121000  | 2.468425000  | 1.347179000  |
| 6  | -2.050664000 | -0.028658000 | 0.074674000  |
| 15 | -3.664612000 | -0.513650000 | -0.154998000 |
| 6  | -4.878474000 | 0.283666000  | 0.918431000  |
| 1  | -5.885164000 | -0.080056000 | 0.702478000  |
| 1  | -4.626194000 | 0.066645000  | 1.957158000  |
| 1  | -4.823467000 | 1.359181000  | 0.754295000  |
| 6  | -3.834030000 | -2.272791000 | 0.184237000  |
| 1  | -4.870929000 | -2.584084000 | 0.043790000  |
| 1  | -3.181610000 | -2.834392000 | -0.487638000 |
| 1  | -3.529331000 | -2.475132000 | 1.212354000  |
| 6  | -4.301603000 | -0.289647000 | -1.830194000 |
| 1  | -4.229055000 | 0.768884000  | -2.080744000 |
| 1  | -3.678022000 | -0.864419000 | -2.516662000 |
| 1  | -5.338940000 | -0.622021000 | -1.906890000 |
| 31 | -0.543334000 | -1.261717000 | 0.301969000  |
| 7  | 2.879732000  | -1.039954000 | 1.029944000  |
| 7  | 3.339415000  | -0.342376000 | -1.411352000 |
| 6  | 2.873294000  | -2.466000000 | 0.752538000  |
| 1  | 1.934479000  | -2.917694000 | 1.105214000  |
| 1  | 2.959870000  | -2.653881000 | -0.317545000 |
| 1  | 3.711282000  | -2.951566000 | 1.263060000  |
| 6  | 2.640280000  | -0.745265000 | 2.433191000  |



|   |              |              |              |
|---|--------------|--------------|--------------|
| 1 | 3.392464000  | -1.262412000 | 3.037327000  |
| 1 | 2.718097000  | 0.323294000  | 2.622515000  |
| 1 | 1.636975000  | -1.077214000 | 2.737506000  |
| 6 | 4.765206000  | -0.550889000 | -1.267593000 |
| 1 | 5.094281000  | -1.340105000 | -1.951226000 |
| 1 | 5.327892000  | 0.359599000  | -1.509528000 |
| 1 | 5.010914000  | -0.850256000 | -0.250191000 |
| 6 | 2.952102000  | 0.125832000  | -2.730012000 |
| 1 | 1.869807000  | 0.233299000  | -2.781032000 |
| 1 | 3.420253000  | 1.089810000  | -2.964892000 |
| 1 | 3.271165000  | -0.602742000 | -3.481007000 |
| 7 | -0.528728000 | 1.897619000  | 0.101078000  |
| 6 | -0.439484000 | 3.323102000  | 0.367703000  |
| 1 | -0.140552000 | 3.516950000  | 1.400611000  |
| 1 | 0.281077000  | 3.790916000  | -0.305442000 |
| 1 | -1.423507000 | 3.747570000  | 0.188221000  |
| 8 | -2.747962000 | 2.158490000  | -0.393823000 |

**<sup>13</sup>Ga-S (T.E = -3525.507336)**

|    |              |              |              |
|----|--------------|--------------|--------------|
| 7  | -1.358159000 | -0.131253000 | 0.153981000  |
| 6  | -1.219945000 | 1.272956000  | 0.415943000  |
| 6  | 0.000077000  | 1.923376000  | 0.532474000  |
| 6  | 1.220293000  | 1.273863000  | 0.411560000  |
| 1  | 0.000106000  | 2.993034000  | 0.714830000  |
| 15 | -2.978229000 | 0.146894000  | 0.072783000  |
| 6  | -2.542740000 | 1.753754000  | 0.473777000  |
| 6  | -3.090533000 | 3.123657000  | 0.602740000  |
| 1  | -2.796523000 | 3.602684000  | 1.542996000  |
| 1  | -2.761602000 | 3.788430000  | -0.207442000 |
| 1  | -4.182759000 | 3.114271000  | 0.582966000  |
| 7  | 1.358664000  | -0.129566000 | 0.146179000  |
| 6  | 2.542800000  | 1.754793000  | 0.471379000  |
| 15 | 2.979117000  | 0.147912000  | 0.070153000  |
| 6  | 3.088658000  | 3.123734000  | 0.615892000  |
| 1  | 2.856519000  | 3.771505000  | -0.240653000 |
| 1  | 2.695662000  | 3.626237000  | 1.506103000  |
| 1  | 4.176047000  | 3.108151000  | 0.717938000  |
| 7  | 3.819794000  | -0.899982000 | 1.047347000  |
| 7  | 3.727315000  | -0.084942000 | -1.398422000 |
| 6  | 3.241325000  | -1.213657000 | 2.341229000  |
| 1  | 3.535664000  | -0.481841000 | 3.104746000  |
| 1  | 2.154663000  | -1.230653000 | 2.272603000  |
| 1  | 3.586758000  | -2.201090000 | 2.659883000  |
| 6  | 5.268904000  | -0.911093000 | 1.062397000  |
| 1  | 5.669603000  | -0.222776000 | 1.818714000  |
| 1  | 5.626262000  | -1.917347000 | 1.303065000  |
| 1  | 5.667612000  | -0.625460000 | 0.090454000  |
| 6  | 3.778507000  | -1.435563000 | -1.937216000 |

|    |              |              |              |
|----|--------------|--------------|--------------|
| 1  | 4.594016000  | -1.512379000 | -2.662129000 |
| 1  | 3.946539000  | -2.162183000 | -1.143638000 |
| 1  | 2.838273000  | -1.696893000 | -2.442778000 |
| 6  | 3.436491000  | 0.900301000  | -2.425837000 |
| 1  | 2.434619000  | 0.756223000  | -2.855091000 |
| 1  | 3.493565000  | 1.908228000  | -2.017913000 |
| 1  | 4.170939000  | 0.805003000  | -3.229803000 |
| 7  | -3.821639000 | -0.902744000 | 1.045942000  |
| 7  | -3.723605000 | -0.082407000 | -1.397737000 |
| 6  | -5.270866000 | -0.907578000 | 1.060630000  |
| 1  | -5.632555000 | -1.912445000 | 1.300498000  |
| 1  | -5.668793000 | -0.217979000 | 1.817249000  |
| 1  | -5.668155000 | -0.619620000 | 0.088774000  |
| 6  | -3.245425000 | -1.220589000 | 2.339872000  |
| 1  | -2.158910000 | -1.244332000 | 2.271514000  |
| 1  | -3.535438000 | -0.487391000 | 3.103766000  |
| 1  | -3.597254000 | -2.205971000 | 2.657807000  |
| 6  | -3.429192000 | 0.903239000  | -2.423788000 |
| 1  | -4.163297000 | 0.810947000  | -3.228423000 |
| 1  | -3.483430000 | 1.910929000  | -2.014772000 |
| 1  | -2.427430000 | 0.756675000  | -2.852461000 |
| 6  | -3.780130000 | -1.431980000 | -1.938440000 |
| 1  | -3.950725000 | -2.159080000 | -1.145887000 |
| 1  | -4.596031000 | -1.504696000 | -2.663359000 |
| 1  | -2.840996000 | -1.696125000 | -2.444566000 |
| 31 | -0.000071000 | -1.584360000 | -0.236959000 |

**<sup>13</sup>Ga-T (T.E = -3525.411802)**

|    |              |              |              |
|----|--------------|--------------|--------------|
| 7  | 1.427783000  | -0.044723000 | -0.777947000 |
| 6  | 1.232884000  | 1.414119000  | -0.809755000 |
| 6  | 0.025656000  | 2.015184000  | -0.420786000 |
| 6  | -1.176700000 | 1.351436000  | -0.270292000 |
| 1  | 0.026926000  | 3.090924000  | -0.263413000 |
| 15 | 2.871795000  | 0.150561000  | -0.057041000 |
| 6  | 2.545522000  | 1.850439000  | -0.289984000 |
| 6  | 3.149576000  | 3.177120000  | -0.118952000 |
| 1  | 3.264126000  | 3.695647000  | -1.079813000 |
| 1  | 2.519656000  | 3.825304000  | 0.504148000  |
| 1  | 4.131771000  | 3.120274000  | 0.354643000  |
| 7  | -1.336318000 | -0.082151000 | -0.483831000 |
| 6  | -2.486219000 | 1.780291000  | 0.068745000  |
| 15 | -2.897331000 | 0.118177000  | -0.026435000 |
| 6  | -3.014759000 | 3.084716000  | 0.521554000  |
| 1  | -2.519568000 | 3.445528000  | 1.434725000  |
| 1  | -2.891686000 | 3.870796000  | -0.232406000 |
| 1  | -4.083635000 | 3.021569000  | 0.740049000  |
| 7  | -3.961895000 | -0.540770000 | -1.128787000 |
| 7  | -3.405525000 | -0.602107000 | 1.390827000  |

|    |              |              |              |
|----|--------------|--------------|--------------|
| 6  | -3.605051000 | -0.392985000 | -2.529744000 |
| 1  | -3.849823000 | 0.609378000  | -2.907836000 |
| 1  | -2.538505000 | -0.564291000 | -2.663619000 |
| 1  | -4.159974000 | -1.128609000 | -3.117921000 |
| 6  | -5.382383000 | -0.346709000 | -0.901330000 |
| 1  | -5.710386000 | 0.653027000  | -1.222698000 |
| 1  | -5.948800000 | -1.086471000 | -1.474105000 |
| 1  | -5.625074000 | -0.465922000 | 0.153835000  |
| 6  | -3.540998000 | -2.049473000 | 1.441044000  |
| 1  | -4.208916000 | -2.326496000 | 2.262069000  |
| 1  | -3.954944000 | -2.429661000 | 0.508789000  |
| 1  | -2.568497000 | -2.535519000 | 1.605818000  |
| 6  | -2.817522000 | -0.069608000 | 2.607215000  |
| 1  | -1.791778000 | -0.438499000 | 2.757591000  |
| 1  | -2.788954000 | 1.018903000  | 2.573319000  |
| 1  | -3.420435000 | -0.379373000 | 3.464957000  |
| 7  | 4.088165000  | -0.659121000 | -0.831680000 |
| 7  | 3.131065000  | -0.288346000 | 1.535733000  |
| 6  | 5.451623000  | -0.684200000 | -0.347029000 |
| 1  | 5.864730000  | -1.695677000 | -0.430884000 |
| 1  | 6.089141000  | -0.012887000 | -0.935461000 |
| 1  | 5.497033000  | -0.378022000 | 0.696777000  |
| 6  | 3.967256000  | -0.961549000 | -2.244973000 |
| 1  | 2.923151000  | -0.911451000 | -2.548173000 |
| 1  | 4.550914000  | -0.259816000 | -2.853240000 |
| 1  | 4.341293000  | -1.972235000 | -2.435970000 |
| 6  | 2.365827000  | 0.460137000  | 2.520703000  |
| 1  | 2.807485000  | 0.306792000  | 3.508550000  |
| 1  | 2.380793000  | 1.526089000  | 2.290983000  |
| 1  | 1.315110000  | 0.132840000  | 2.551684000  |
| 6  | 3.223674000  | -1.699175000 | 1.884544000  |
| 1  | 3.721645000  | -2.262480000 | 1.096927000  |
| 1  | 3.794683000  | -1.809612000 | 2.810878000  |
| 1  | 2.227776000  | -2.138274000 | 2.034083000  |
| 31 | 0.056598000  | -1.535831000 | -0.404133000 |

Cartesian coordinates of the transition states involved in the dihydrogen activation by some of the representative Al(I)/Ga(I) carbenoids and also their total energies (in hartrees) including the zero point vibrational correction that have been calculated at **M06-D3/Def2-TZVP** level of theory.

**1AITS<sup>H-H</sup>** (T.E = -931.965796)

|    |              |              |              |
|----|--------------|--------------|--------------|
| 7  | 1.426588000  | 0.464323000  | -0.379623000 |
| 6  | 1.230276000  | 1.741670000  | -0.632028000 |
| 6  | 0.000008000  | 2.369047000  | -0.773016000 |
| 7  | -1.426592000 | 0.464320000  | -0.379605000 |
| 1  | 0.000004000  | 3.420223000  | -1.022827000 |
| 1  | 2.123416000  | 2.356686000  | -0.756249000 |
| 6  | 2.740998000  | 0.016678000  | -0.101396000 |
| 6  | 3.204813000  | -1.154097000 | -0.689807000 |
| 6  | 3.553095000  | 0.708198000  | 0.789461000  |
| 6  | 4.480815000  | -1.607062000 | -0.413618000 |
| 1  | 2.558392000  | -1.694581000 | -1.373082000 |
| 6  | 4.831341000  | 0.250173000  | 1.058517000  |
| 1  | 3.162048000  | 1.585352000  | 1.293505000  |
| 6  | 5.299246000  | -0.905347000 | 0.457850000  |
| 1  | 4.839863000  | -2.514329000 | -0.884882000 |
| 1  | 5.457769000  | 0.792400000  | 1.757092000  |
| 1  | 6.297374000  | -1.265928000 | 0.675712000  |
| 6  | -2.740999000 | 0.016679000  | -0.101377000 |
| 6  | -3.204720000 | -1.154208000 | -0.689643000 |
| 6  | -3.553206000 | 0.708292000  | 0.789309000  |
| 6  | -4.480720000 | -1.607195000 | -0.413486000 |
| 1  | -2.558220000 | -1.694776000 | -1.372780000 |
| 6  | -4.831452000 | 0.250249000  | 1.058328000  |
| 1  | -3.162254000 | 1.585538000  | 1.293266000  |
| 6  | -5.299257000 | -0.905386000 | 0.457805000  |
| 1  | -4.839684000 | -2.514552000 | -0.884642000 |
| 1  | -5.457959000 | 0.792553000  | 1.756774000  |
| 1  | -6.297384000 | -1.265983000 | 0.675646000  |
| 6  | -1.230254000 | 1.741690000  | -0.631925000 |
| 1  | -2.123386000 | 2.356745000  | -0.756012000 |
| 13 | -0.000004000 | -0.736489000 | 0.043199000  |
| 1  | 0.000044000  | -1.444737000 | 1.458860000  |
| 1  | 0.000155000  | -0.237032000 | 1.902768000  |

**4AITS<sup>H-H</sup>** (T.E = -1144.755857)

|   |              |             |              |
|---|--------------|-------------|--------------|
| 7 | 1.244653000  | 0.537855000 | -0.017571000 |
| 6 | 0.938396000  | 1.812854000 | 0.278062000  |
| 6 | -0.298483000 | 2.401161000 | 0.276065000  |
| 6 | -1.528598000 | 1.728531000 | 0.080297000  |

|    |              |              |              |
|----|--------------|--------------|--------------|
| 6  | -1.669833000 | 0.398467000  | -0.211326000 |
| 6  | 2.586935000  | 0.132771000  | 0.019875000  |
| 6  | 2.878769000  | -1.171731000 | 0.417319000  |
| 6  | 3.637130000  | 0.962396000  | -0.374546000 |
| 6  | 4.184724000  | -1.627993000 | 0.428668000  |
| 1  | 2.072148000  | -1.815797000 | 0.754781000  |
| 6  | 4.939493000  | 0.501749000  | -0.350329000 |
| 1  | 3.426308000  | 1.962573000  | -0.735783000 |
| 6  | 5.223047000  | -0.794843000 | 0.050709000  |
| 1  | 4.390494000  | -2.643740000 | 0.746438000  |
| 1  | 5.741735000  | 1.158859000  | -0.666957000 |
| 1  | 6.245480000  | -1.152974000 | 0.061506000  |
| 1  | 1.774459000  | 2.440605000  | 0.586879000  |
| 15 | -3.217213000 | -0.321363000 | -0.018537000 |
| 6  | -4.602167000 | 0.683140000  | -0.598691000 |
| 1  | -5.544451000 | 0.160352000  | -0.424767000 |
| 1  | -4.625224000 | 1.633588000  | -0.064409000 |
| 1  | -4.487194000 | 0.882512000  | -1.664410000 |
| 6  | -3.331386000 | -1.881918000 | -0.894288000 |
| 1  | -3.204072000 | -1.718910000 | -1.964563000 |
| 1  | -2.536406000 | -2.542519000 | -0.541106000 |
| 1  | -4.300610000 | -2.346083000 | -0.704728000 |
| 6  | -3.588845000 | -0.679445000 | 1.707078000  |
| 1  | -3.637232000 | 0.261844000  | 2.257409000  |
| 1  | -4.537241000 | -1.211131000 | 1.804538000  |
| 1  | -2.770953000 | -1.284125000 | 2.105558000  |
| 1  | -2.412656000 | 2.356220000  | 0.233411000  |
| 1  | -0.331157000 | 3.450604000  | 0.540548000  |
| 13 | -0.086847000 | -0.704586000 | -0.596620000 |
| 1  | -0.176432000 | -2.243168000 | -0.109866000 |
| 1  | -0.627445000 | -1.924458000 | 0.969258000  |

**6AITS<sup>H-H</sup> (T.E = -1275.334086)**

|    |              |              |              |
|----|--------------|--------------|--------------|
| 6  | -1.505394000 | 1.242311000  | -0.136654000 |
| 6  | -1.489202000 | -0.155822000 | -0.200700000 |
| 6  | 1.002869000  | 1.458715000  | -0.260613000 |
| 1  | 1.801249000  | 2.203420000  | -0.255150000 |
| 13 | 0.099963000  | -1.263004000 | -0.345720000 |
| 7  | 1.347814000  | 0.209735000  | -0.276839000 |
| 15 | -3.038063000 | -0.799294000 | 0.104002000  |
| 6  | -3.710925000 | -0.385714000 | 1.727397000  |
| 1  | -3.818534000 | 0.696226000  | 1.796473000  |
| 1  | -4.678667000 | -0.866941000 | 1.882653000  |
| 1  | -3.005109000 | -0.725597000 | 2.487603000  |
| 6  | -4.335955000 | -0.364467000 | -1.072891000 |
| 1  | -4.052795000 | -0.721224000 | -2.063830000 |
| 1  | -5.287203000 | -0.814406000 | -0.781324000 |
| 1  | -4.429507000 | 0.720767000  | -1.095629000 |

|   |              |              |              |
|---|--------------|--------------|--------------|
| 6 | -2.960613000 | -2.596554000 | 0.088940000  |
| 1 | -2.274971000 | -2.937996000 | 0.867860000  |
| 1 | -3.951355000 | -3.015059000 | 0.275149000  |
| 1 | -2.591057000 | -2.949115000 | -0.875175000 |
| 8 | -2.481797000 | 1.979175000  | 0.000838000  |
| 7 | -0.230535000 | 1.971361000  | -0.252275000 |
| 6 | -0.364053000 | 3.420100000  | -0.285696000 |
| 1 | -0.960903000 | 3.728543000  | -1.143550000 |
| 1 | -0.865599000 | 3.779340000  | 0.611785000  |
| 1 | 0.625490000  | 3.869062000  | -0.356813000 |
| 6 | 2.725022000  | -0.087897000 | -0.097581000 |
| 6 | 3.374795000  | -0.905759000 | -1.011153000 |
| 6 | 3.405682000  | 0.394420000  | 1.011842000  |
| 6 | 4.711053000  | -1.212903000 | -0.825963000 |
| 1 | 2.823595000  | -1.288902000 | -1.862686000 |
| 6 | 4.744135000  | 0.087822000  | 1.187063000  |
| 1 | 2.866480000  | 0.979392000  | 1.749332000  |
| 6 | 5.398840000  | -0.715217000 | 0.268957000  |
| 1 | 5.219004000  | -1.843895000 | -1.545715000 |
| 1 | 5.271104000  | 0.463324000  | 2.056287000  |
| 1 | 6.444413000  | -0.961489000 | 0.411111000  |
| 1 | 0.637653000  | -2.444072000 | 0.594418000  |
| 1 | 0.554043000  | -1.638185000 | 1.520945000  |

**8AITS<sup>H-H</sup>** (T.E = -1509.381932)

|    |              |              |              |
|----|--------------|--------------|--------------|
| 7  | 1.305141000  | 0.167635000  | -1.118627000 |
| 6  | 1.071997000  | 1.421900000  | -0.498439000 |
| 6  | -0.039299000 | 2.250124000  | -0.963885000 |
| 15 | 2.381865000  | -0.111025000 | 0.108623000  |
| 6  | 1.932681000  | 1.518044000  | 0.562831000  |
| 6  | 2.187672000  | 2.566410000  | 1.573913000  |
| 1  | 3.208522000  | 2.957958000  | 1.534870000  |
| 1  | 1.512458000  | 3.411157000  | 1.411969000  |
| 1  | 2.020509000  | 2.213374000  | 2.596768000  |
| 7  | 2.090712000  | -1.229321000 | 1.265660000  |
| 7  | 3.844177000  | -0.533777000 | -0.512599000 |
| 6  | 2.405716000  | -2.642135000 | 1.095786000  |
| 1  | 1.501293000  | -3.196233000 | 0.824680000  |
| 1  | 3.140609000  | -2.783720000 | 0.306002000  |
| 1  | 2.811719000  | -3.034372000 | 2.033714000  |
| 6  | 0.988755000  | -1.015784000 | 2.195315000  |
| 1  | 1.248959000  | -1.449170000 | 3.165009000  |
| 1  | 0.793292000  | 0.048325000  | 2.324324000  |
| 1  | 0.077628000  | -1.496120000 | 1.818110000  |
| 6  | 4.990521000  | -0.722608000 | 0.355369000  |
| 1  | 5.561816000  | -1.600055000 | 0.035924000  |
| 1  | 5.656474000  | 0.147619000  | 0.321298000  |
| 1  | 4.676097000  | -0.876537000 | 1.387051000  |

|    |              |              |              |
|----|--------------|--------------|--------------|
| 6  | 4.196136000  | -0.226964000 | -1.887814000 |
| 1  | 3.300585000  | -0.163315000 | -2.501986000 |
| 1  | 4.745972000  | 0.719105000  | -1.958889000 |
| 1  | 4.835581000  | -1.023689000 | -2.278103000 |
| 13 | -0.212001000 | -0.714090000 | -1.877535000 |
| 6  | -2.527654000 | -0.707111000 | -0.378012000 |
| 6  | -2.725149000 | -0.839012000 | 0.998742000  |
| 6  | -3.284718000 | -1.511101000 | -1.228974000 |
| 6  | -3.656449000 | -1.726778000 | 1.501124000  |
| 1  | -2.134536000 | -0.219549000 | 1.667618000  |
| 6  | -4.205334000 | -2.412469000 | -0.720558000 |
| 1  | -3.143886000 | -1.411264000 | -2.300799000 |
| 6  | -4.401630000 | -2.524001000 | 0.644716000  |
| 1  | -3.797217000 | -1.804142000 | 2.573866000  |
| 1  | -4.781770000 | -3.027063000 | -1.403185000 |
| 1  | -5.127402000 | -3.224672000 | 1.039989000  |
| 7  | -1.554509000 | 0.165898000  | -0.889552000 |
| 5  | -1.441534000 | 1.536958000  | -0.554368000 |
| 7  | -2.463681000 | 2.341516000  | 0.036221000  |
| 6  | -3.869165000 | 2.009958000  | 0.008646000  |
| 1  | -4.068761000 | 1.178289000  | -0.663552000 |
| 1  | -4.252390000 | 1.740642000  | 1.002248000  |
| 1  | -4.445530000 | 2.875163000  | -0.342998000 |
| 6  | -2.241224000 | 3.586517000  | 0.724115000  |
| 1  | -1.181104000 | 3.778569000  | 0.883821000  |
| 1  | -2.669953000 | 4.441007000  | 0.181687000  |
| 1  | -2.716545000 | 3.565038000  | 1.713681000  |
| 1  | 0.051118000  | 3.274091000  | -0.604752000 |
| 1  | -0.022735000 | 2.280537000  | -2.062273000 |
| 1  | -0.095116000 | -2.313302000 | -1.863902000 |
| 1  | 0.040019000  | -2.277496000 | -0.656720000 |

**10AITS<sup>H-H</sup> (T.E = -1600.882768)**

|    |              |              |              |
|----|--------------|--------------|--------------|
| 7  | 0.597294000  | -0.049371000 | -0.395313000 |
| 6  | 0.570912000  | 1.385326000  | -0.300057000 |
| 6  | -0.604684000 | 2.129737000  | -0.293244000 |
| 6  | -1.888479000 | 1.585796000  | -0.261993000 |
| 1  | -0.496883000 | 3.208794000  | -0.307096000 |
| 1  | -2.681771000 | 2.338010000  | -0.323651000 |
| 15 | 2.212844000  | 0.060473000  | -0.092041000 |
| 6  | 1.923308000  | 1.749396000  | -0.201936000 |
| 6  | 2.573537000  | 3.058904000  | 0.031100000  |
| 1  | 2.525083000  | 3.718197000  | -0.842420000 |
| 1  | 2.113717000  | 3.602671000  | 0.866443000  |
| 1  | 3.631851000  | 2.936348000  | 0.273388000  |
| 6  | -2.251248000 | 0.252615000  | -0.139146000 |
| 15 | -3.875838000 | -0.212789000 | -0.039327000 |
| 6  | -5.072870000 | 1.134363000  | 0.085918000  |

|    |              |              |              |
|----|--------------|--------------|--------------|
| 1  | -6.079183000 | 0.723391000  | 0.181198000  |
| 1  | -4.851457000 | 1.748070000  | 0.959615000  |
| 1  | -5.029360000 | 1.760645000  | -0.805862000 |
| 6  | -4.165746000 | -1.267374000 | 1.393427000  |
| 1  | -5.199199000 | -1.617270000 | 1.432442000  |
| 1  | -3.493248000 | -2.127102000 | 1.321219000  |
| 1  | -3.917785000 | -0.716386000 | 2.301015000  |
| 6  | -4.451435000 | -1.217237000 | -1.428692000 |
| 1  | -4.414052000 | -0.623478000 | -2.342709000 |
| 1  | -3.776104000 | -2.068356000 | -1.538688000 |
| 1  | -5.469062000 | -1.577880000 | -1.263919000 |
| 7  | 2.745751000  | -0.475640000 | 1.382115000  |
| 7  | 3.067959000  | -0.885709000 | -1.145188000 |
| 6  | 2.622036000  | -1.893676000 | 1.695356000  |
| 1  | 1.643800000  | -2.105324000 | 2.146091000  |
| 1  | 2.721553000  | -2.500353000 | 0.796309000  |
| 1  | 3.404180000  | -2.185189000 | 2.402692000  |
| 6  | 2.466715000  | 0.363469000  | 2.539778000  |
| 1  | 3.121394000  | 0.058226000  | 3.360604000  |
| 1  | 2.660114000  | 1.410041000  | 2.311504000  |
| 1  | 1.422386000  | 0.260594000  | 2.864442000  |
| 6  | 4.480411000  | -1.158412000 | -0.989175000 |
| 1  | 4.691065000  | -2.197294000 | -1.264882000 |
| 1  | 5.085436000  | -0.509904000 | -1.635366000 |
| 1  | 4.790667000  | -1.005153000 | 0.042951000  |
| 6  | 2.605171000  | -0.988839000 | -2.515873000 |
| 1  | 1.532255000  | -0.808693000 | -2.563283000 |
| 1  | 3.116253000  | -0.269571000 | -3.167793000 |
| 1  | 2.805707000  | -1.996466000 | -2.891759000 |
| 13 | -0.856912000 | -1.143854000 | -0.012465000 |
| 1  | -0.760223000 | -2.117862000 | 1.275229000  |
| 1  | -0.735162000 | -1.113239000 | 1.960759000  |

**11AITS<sup>H-H</sup> (T.E = -1518.683993)**

|    |              |              |              |
|----|--------------|--------------|--------------|
| 7  | -0.762806000 | -0.163930000 | 0.427947000  |
| 6  | -0.804288000 | 1.191661000  | 0.047917000  |
| 6  | 1.694149000  | 1.483820000  | 0.002042000  |
| 15 | -2.393886000 | -0.199517000 | 0.130296000  |
| 6  | -2.153471000 | 1.494851000  | -0.138922000 |
| 6  | -2.984238000 | 2.652894000  | -0.563574000 |
| 1  | -3.033790000 | 3.450290000  | 0.183119000  |
| 1  | -2.648963000 | 3.102906000  | -1.502386000 |
| 1  | -4.012582000 | 2.320890000  | -0.726708000 |
| 7  | -2.952346000 | -1.022701000 | -1.172547000 |
| 7  | -3.161475000 | -0.904213000 | 1.401442000  |
| 6  | -2.868145000 | -2.477788000 | -1.206546000 |
| 1  | -1.980301000 | -2.791921000 | -1.766648000 |
| 1  | -2.799128000 | -2.887666000 | -0.199834000 |



|    |              |              |              |
|----|--------------|--------------|--------------|
| 1  | -3.756759000 | -2.889175000 | -1.693985000 |
| 6  | -2.883531000 | -0.427133000 | -2.501720000 |
| 1  | -3.667808000 | -0.867875000 | -3.122928000 |
| 1  | -3.042611000 | 0.647929000  | -2.451600000 |
| 1  | -1.905462000 | -0.616857000 | -2.961025000 |
| 6  | -4.569781000 | -1.247144000 | 1.372925000  |
| 1  | -4.719403000 | -2.234872000 | 1.820233000  |
| 1  | -5.162104000 | -0.523197000 | 1.944216000  |
| 1  | -4.942631000 | -1.271056000 | 0.350616000  |
| 6  | -2.623779000 | -0.767674000 | 2.744290000  |
| 1  | -1.556102000 | -0.561946000 | 2.704317000  |
| 1  | -3.124215000 | 0.038750000  | 3.292379000  |
| 1  | -2.778488000 | -1.702053000 | 3.290635000  |
| 7  | 0.309054000  | 1.931391000  | -0.076431000 |
| 6  | 0.119709000  | 3.349587000  | -0.351219000 |
| 1  | -0.171637000 | 3.511494000  | -1.391017000 |
| 1  | -0.646933000 | 3.756726000  | 0.306678000  |
| 1  | 1.061850000  | 3.854626000  | -0.165751000 |
| 8  | 2.538950000  | 2.347418000  | 0.017601000  |
| 7  | 1.913497000  | 0.151222000  | 0.011669000  |
| 6  | 3.277401000  | -0.258758000 | 0.039810000  |
| 6  | 4.163956000  | 0.165664000  | 1.022017000  |
| 6  | 3.703581000  | -1.179121000 | -0.908660000 |
| 6  | 5.455476000  | -0.324829000 | 1.046816000  |
| 1  | 3.834403000  | 0.884703000  | 1.761216000  |
| 6  | 4.997085000  | -1.673250000 | -0.875546000 |
| 1  | 3.014433000  | -1.488898000 | -1.689381000 |
| 6  | 5.878227000  | -1.246579000 | 0.101089000  |
| 1  | 6.139516000  | 0.013537000  | 1.816844000  |
| 1  | 5.315446000  | -2.390837000 | -1.622862000 |
| 1  | 6.891895000  | -1.628932000 | 0.127234000  |
| 13 | 0.675984000  | -1.260587000 | -0.022226000 |
| 1  | 0.457010000  | -2.248678000 | -1.255855000 |
| 1  | 0.207685000  | -1.236424000 | -1.982696000 |

**13AITS<sup>H-H</sup> (T.E = -1844.233287)**

|    |              |              |              |
|----|--------------|--------------|--------------|
| 7  | 1.348573000  | -0.172014000 | 0.151840000  |
| 6  | 1.215315000  | 1.187504000  | -0.306843000 |
| 6  | -0.002840000 | 1.838944000  | -0.432465000 |
| 6  | -1.224965000 | 1.247069000  | -0.136464000 |
| 1  | -0.004980000 | 2.853130000  | -0.817253000 |
| 13 | -0.039360000 | -1.377506000 | 0.343651000  |
| 15 | 2.974281000  | 0.021352000  | -0.017083000 |
| 6  | 2.536030000  | 1.589232000  | -0.558063000 |
| 6  | 3.109748000  | 2.890177000  | -0.969624000 |
| 1  | 4.172963000  | 2.799166000  | -1.201929000 |
| 1  | 2.622987000  | 3.280352000  | -1.869486000 |
| 1  | 3.015591000  | 3.664432000  | -0.196737000 |

|    |              |              |              |
|----|--------------|--------------|--------------|
| 7  | -1.364175000 | -0.080219000 | 0.401951000  |
| 6  | -2.546058000 | 1.684865000  | -0.312939000 |
| 15 | -2.978475000 | 0.076845000  | 0.103281000  |
| 6  | -3.094472000 | 2.915453000  | -0.927329000 |
| 1  | -2.938832000 | 3.803621000  | -0.305684000 |
| 1  | -2.639862000 | 3.125886000  | -1.903996000 |
| 1  | -4.171496000 | 2.829550000  | -1.088451000 |
| 7  | -3.621001000 | -0.833899000 | -1.119051000 |
| 7  | -3.853895000 | -0.417422000 | 1.416519000  |
| 6  | -3.616930000 | -2.285688000 | -0.985572000 |
| 1  | -2.682756000 | -2.703887000 | -1.382632000 |
| 1  | -3.710495000 | -2.579955000 | 0.059012000  |
| 1  | -4.455960000 | -2.710397000 | -1.544503000 |
| 6  | -3.350132000 | -0.413282000 | -2.487825000 |
| 1  | -2.342402000 | -0.716415000 | -2.802925000 |
| 1  | -4.083628000 | -0.881182000 | -3.150178000 |
| 1  | -3.436093000 | 0.667811000  | -2.581264000 |
| 6  | -3.348879000 | -0.106379000 | 2.740443000  |
| 1  | -3.594173000 | -0.923898000 | 3.424696000  |
| 1  | -2.266497000 | 0.008765000  | 2.711534000  |
| 1  | -3.793814000 | 0.816477000  | 3.132528000  |
| 6  | -5.286912000 | -0.618705000 | 1.379668000  |
| 1  | -5.820737000 | 0.244314000  | 1.796877000  |
| 1  | -5.628204000 | -0.775982000 | 0.358204000  |
| 1  | -5.553757000 | -1.498155000 | 1.975273000  |
| 7  | 3.614093000  | -1.187213000 | -0.943145000 |
| 7  | 3.897093000  | -0.064493000 | 1.359341000  |
| 6  | 5.036079000  | -1.437539000 | -1.048525000 |
| 1  | 5.220756000  | -2.516759000 | -1.074189000 |
| 1  | 5.447451000  | -1.005529000 | -1.969255000 |
| 1  | 5.569794000  | -1.014511000 | -0.199530000 |
| 6  | 2.862568000  | -1.654651000 | -2.096769000 |
| 1  | 1.802044000  | -1.403784000 | -2.015485000 |
| 1  | 3.253620000  | -1.214760000 | -3.021734000 |
| 1  | 2.947576000  | -2.743025000 | -2.169561000 |
| 6  | 3.878494000  | 1.087166000  | 2.244091000  |
| 1  | 4.734936000  | 1.030011000  | 2.921102000  |
| 1  | 3.947073000  | 2.011730000  | 1.673330000  |
| 1  | 2.962349000  | 1.120832000  | 2.849265000  |
| 6  | 3.928899000  | -1.322975000 | 2.089413000  |
| 1  | 3.851705000  | -2.168950000 | 1.407434000  |
| 1  | 4.866469000  | -1.406467000 | 2.646999000  |
| 1  | 3.094705000  | -1.385687000 | 2.800418000  |
| 1  | -0.196470000 | -2.641985000 | -0.628950000 |
| 1  | -0.335757000 | -1.850449000 | -1.612727000 |

**1GaTS<sup>H-H</sup>** (T.E = -2614.336421)

|   |              |             |              |
|---|--------------|-------------|--------------|
| 7 | -1.460965000 | 0.565516000 | -0.368719000 |
|---|--------------|-------------|--------------|

|    |              |              |              |
|----|--------------|--------------|--------------|
| 7  | 1.460951000  | 0.565472000  | -0.368673000 |
| 6  | -1.236481000 | 1.836837000  | -0.609883000 |
| 6  | 1.236470000  | 1.836800000  | -0.609867000 |
| 6  | 0.000009000  | 2.453447000  | -0.748671000 |
| 1  | 0.000029000  | 3.506582000  | -0.991174000 |
| 6  | -2.772362000 | 0.123367000  | -0.092821000 |
| 6  | -3.611532000 | 0.847524000  | 0.746912000  |
| 6  | -3.216333000 | -1.077358000 | -0.635638000 |
| 6  | -4.891928000 | 0.391802000  | 1.006996000  |
| 6  | -4.494528000 | -1.528259000 | -0.367355000 |
| 6  | -5.338830000 | -0.794044000 | 0.450604000  |
| 1  | -5.537436000 | 0.960369000  | 1.666254000  |
| 1  | -4.835195000 | -2.459894000 | -0.803599000 |
| 1  | -6.339009000 | -1.152296000 | 0.662636000  |
| 6  | 2.772359000  | 0.123339000  | -0.092791000 |
| 6  | 3.216266000  | -1.077474000 | -0.635465000 |
| 6  | 3.611613000  | 0.847598000  | 0.746772000  |
| 6  | 4.494472000  | -1.528365000 | -0.367219000 |
| 6  | 4.892017000  | 0.391883000  | 1.006825000  |
| 6  | 5.338854000  | -0.794051000 | 0.450568000  |
| 1  | 4.835083000  | -2.460072000 | -0.803354000 |
| 1  | 5.537586000  | 0.960529000  | 1.665955000  |
| 1  | 6.339040000  | -1.152296000 | 0.662578000  |
| 1  | 3.241340000  | 1.749452000  | 1.221421000  |
| 1  | 2.551192000  | -1.643086000 | -1.279512000 |
| 1  | -2.551326000 | -1.642881000 | -1.279830000 |
| 1  | -3.241197000 | 1.749300000  | 1.221662000  |
| 31 | -0.000010000 | -0.702543000 | -0.000401000 |
| 1  | 2.119515000  | 2.467967000  | -0.729021000 |
| 1  | -2.119515000 | 2.468020000  | -0.729038000 |
| 1  | -0.000003000 | -1.545346000 | 1.302386000  |
| 1  | -0.000088000 | -0.262715000 | 1.892996000  |

**4GaTS<sup>H-H</sup> (T.E = -2827.131640)**

|   |              |              |              |
|---|--------------|--------------|--------------|
| 7 | 1.263865000  | 0.584724000  | -0.396268000 |
| 6 | 0.959603000  | 1.871768000  | -0.536790000 |
| 6 | -0.288748000 | 2.442972000  | -0.661347000 |
| 6 | -1.514616000 | 1.776020000  | -0.469517000 |
| 6 | -1.694952000 | 0.427269000  | -0.326543000 |
| 6 | 2.578393000  | 0.224587000  | -0.060965000 |
| 6 | 3.118060000  | -0.957019000 | -0.566230000 |
| 6 | 3.359537000  | 1.003664000  | 0.791427000  |
| 6 | 4.409926000  | -1.329972000 | -0.251967000 |
| 1 | 2.509580000  | -1.574152000 | -1.219354000 |
| 6 | 4.655476000  | 0.627339000  | 1.096178000  |
| 1 | 2.933945000  | 1.892267000  | 1.243536000  |
| 6 | 5.190353000  | -0.538239000 | 0.576003000  |
| 1 | 4.813578000  | -2.248441000 | -0.662897000 |

|    |              |              |              |
|----|--------------|--------------|--------------|
| 1  | 5.245642000  | 1.244713000  | 1.764188000  |
| 1  | 6.202633000  | -0.834850000 | 0.823270000  |
| 1  | 1.808318000  | 2.558493000  | -0.557752000 |
| 15 | -3.159780000 | -0.187218000 | 0.309958000  |
| 6  | -4.641069000 | 0.724755000  | -0.172539000 |
| 1  | -5.524737000 | 0.262896000  | 0.271143000  |
| 1  | -4.574349000 | 1.755975000  | 0.176044000  |
| 1  | -4.735561000 | 0.725005000  | -1.258728000 |
| 6  | -3.412764000 | -1.889262000 | -0.199647000 |
| 1  | -3.435068000 | -1.951065000 | -1.287990000 |
| 1  | -2.579995000 | -2.492639000 | 0.168378000  |
| 1  | -4.346273000 | -2.274093000 | 0.213834000  |
| 6  | -3.171565000 | -0.210453000 | 2.110410000  |
| 1  | -3.174796000 | 0.817549000  | 2.476450000  |
| 1  | -4.042583000 | -0.742890000 | 2.496730000  |
| 1  | -2.249141000 | -0.702140000 | 2.435561000  |
| 1  | -2.381370000 | 2.441332000  | -0.401196000 |
| 1  | -0.312212000 | 3.514522000  | -0.813103000 |
| 31 | -0.150777000 | -0.809869000 | -0.560294000 |
| 1  | 0.038718000  | -2.140544000 | 0.266901000  |
| 1  | -0.258411000 | -1.471390000 | 1.387767000  |

**6GaTS<sup>H-H</sup> (T.E = -2957.713283)**

|    |              |              |              |
|----|--------------|--------------|--------------|
| 6  | -1.514493000 | 1.389386000  | -0.184028000 |
| 6  | -1.526726000 | -0.004564000 | -0.252760000 |
| 6  | 0.993823000  | 1.604910000  | -0.289243000 |
| 1  | 1.781373000  | 2.362117000  | -0.252535000 |
| 7  | 1.352184000  | 0.364772000  | -0.268386000 |
| 15 | -3.020079000 | -0.656845000 | 0.247865000  |
| 6  | -3.461216000 | -0.249946000 | 1.949299000  |
| 1  | -3.558205000 | 0.832039000  | 2.035229000  |
| 1  | -4.397759000 | -0.730925000 | 2.238213000  |
| 1  | -2.653729000 | -0.592916000 | 2.599196000  |
| 6  | -4.462766000 | -0.220190000 | -0.743207000 |
| 1  | -4.310460000 | -0.564038000 | -1.766873000 |
| 1  | -5.363675000 | -0.681275000 | -0.333121000 |
| 1  | -4.563881000 | 0.864574000  | -0.741307000 |
| 6  | -2.924779000 | -2.451842000 | 0.210608000  |
| 1  | -2.130089000 | -2.779979000 | 0.885816000  |
| 1  | -3.872284000 | -2.885888000 | 0.533818000  |
| 1  | -2.695324000 | -2.794180000 | -0.799436000 |
| 8  | -2.478016000 | 2.129619000  | 0.021066000  |
| 7  | -0.244106000 | 2.107595000  | -0.363195000 |
| 6  | -0.380413000 | 3.554658000  | -0.445318000 |
| 1  | -1.032389000 | 3.823875000  | -1.275204000 |
| 1  | -0.821906000 | 3.957388000  | 0.465756000  |
| 1  | 0.601635000  | 3.997114000  | -0.605549000 |
| 6  | 2.711580000  | 0.066502000  | -0.020709000 |

|    |             |              |              |
|----|-------------|--------------|--------------|
| 6  | 3.374703000 | -0.832672000 | -0.846263000 |
| 6  | 3.377187000 | 0.629890000  | 1.060713000  |
| 6  | 4.700402000 | -1.140233000 | -0.604278000 |
| 1  | 2.838799000 | -1.279145000 | -1.676547000 |
| 6  | 4.706142000 | 0.321185000  | 1.293031000  |
| 1  | 2.834544000 | 1.281294000  | 1.737201000  |
| 6  | 5.371809000 | -0.562597000 | 0.461543000  |
| 1  | 5.214625000 | -1.836223000 | -1.256690000 |
| 1  | 5.217432000 | 0.761236000  | 2.141244000  |
| 1  | 6.409837000 | -0.809816000 | 0.649382000  |
| 31 | 0.036063000 | -1.159135000 | -0.492709000 |
| 1  | 0.599674000 | -2.403375000 | 0.281226000  |
| 1  | 0.361073000 | -1.706445000 | 1.412385000  |

**8GaTS<sup>H-H</sup>** (T.E = -3191.751259)

|    |              |              |              |
|----|--------------|--------------|--------------|
| 7  | 1.395188000  | 0.253505000  | -1.040245000 |
| 6  | 1.079840000  | 1.478324000  | -0.400172000 |
| 6  | -0.023377000 | 2.294988000  | -0.903899000 |
| 15 | 2.373807000  | -0.042794000 | 0.269253000  |
| 6  | 1.854695000  | 1.563945000  | 0.725923000  |
| 6  | 2.001042000  | 2.588741000  | 1.782281000  |
| 1  | 1.298600000  | 3.408159000  | 1.605800000  |
| 1  | 1.787898000  | 2.193650000  | 2.780862000  |
| 1  | 3.003512000  | 3.025546000  | 1.820106000  |
| 7  | 2.028247000  | -1.196186000 | 1.374684000  |
| 7  | 3.895733000  | -0.411006000 | -0.239918000 |
| 6  | 2.392992000  | -2.596280000 | 1.201675000  |
| 1  | 1.516065000  | -3.173140000 | 0.892389000  |
| 1  | 3.157589000  | -2.706957000 | 0.435286000  |
| 1  | 2.778781000  | -2.987235000 | 2.149045000  |
| 6  | 0.872267000  | -1.026997000 | 2.245987000  |
| 1  | 1.089502000  | -1.476737000 | 3.218886000  |
| 1  | 0.647328000  | 0.029754000  | 2.386250000  |
| 1  | -0.008006000 | -1.515095000 | 1.810412000  |
| 6  | 4.967204000  | -0.625364000 | 0.713791000  |
| 1  | 5.597975000  | -1.457988000 | 0.386499000  |
| 1  | 5.599740000  | 0.266161000  | 0.800642000  |
| 1  | 4.569894000  | -0.863243000 | 1.699514000  |
| 6  | 4.362198000  | 0.024395000  | -1.544379000 |
| 1  | 3.521997000  | 0.133358000  | -2.226137000 |
| 1  | 4.894765000  | 0.981049000  | -1.478838000 |
| 1  | 5.051800000  | -0.723092000 | -1.946578000 |
| 6  | -2.456954000 | -0.663412000 | -0.136364000 |
| 6  | -2.675897000 | -0.669185000 | 1.243952000  |
| 6  | -3.164972000 | -1.581382000 | -0.912733000 |
| 6  | -3.572938000 | -1.549287000 | 1.818600000  |
| 1  | -2.126311000 | 0.038211000  | 1.858057000  |
| 6  | -4.051600000 | -2.470318000 | -0.331730000 |

|    |              |              |              |
|----|--------------|--------------|--------------|
| 1  | -3.009585000 | -1.582450000 | -1.987607000 |
| 6  | -4.266201000 | -2.460034000 | 1.036311000  |
| 1  | -3.726995000 | -1.529057000 | 2.892197000  |
| 1  | -4.586408000 | -3.175183000 | -0.958818000 |
| 1  | -4.964612000 | -3.153770000 | 1.488775000  |
| 7  | -1.519781000 | 0.200704000  | -0.712256000 |
| 5  | -1.421393000 | 1.592313000  | -0.472611000 |
| 7  | -2.467106000 | 2.414257000  | 0.049565000  |
| 6  | -3.864192000 | 2.049693000  | 0.019949000  |
| 1  | -4.032193000 | 1.172638000  | -0.601383000 |
| 1  | -4.259737000 | 1.834558000  | 1.021964000  |
| 1  | -4.452721000 | 2.877684000  | -0.395276000 |
| 6  | -2.284856000 | 3.705298000  | 0.659895000  |
| 1  | -1.231999000 | 3.939928000  | 0.808733000  |
| 1  | -2.736791000 | 4.510064000  | 0.063258000  |
| 1  | -2.763933000 | 3.732088000  | 1.647659000  |
| 1  | 0.060595000  | 3.326221000  | -0.564133000 |
| 1  | 0.003380000  | 2.301213000  | -2.001326000 |
| 31 | -0.180898000 | -0.691663000 | -1.808947000 |
| 1  | -0.040880000 | -2.246055000 | -1.939249000 |
| 1  | 0.126962000  | -2.266039000 | -0.602694000 |

**10GaTS<sup>H-H</sup>** (T.E = -3283.257407)

|    |              |              |              |
|----|--------------|--------------|--------------|
| 7  | 0.700931000  | 0.065572000  | -0.488458000 |
| 6  | 0.682559000  | 1.488563000  | -0.340991000 |
| 6  | -0.486532000 | 2.249540000  | -0.333875000 |
| 6  | -1.774485000 | 1.726472000  | -0.297863000 |
| 1  | -0.364974000 | 3.327111000  | -0.325857000 |
| 1  | -2.557765000 | 2.489895000  | -0.342066000 |
| 15 | 2.297328000  | 0.144195000  | -0.087145000 |
| 6  | 2.032205000  | 1.840736000  | -0.182027000 |
| 6  | 2.683610000  | 3.138073000  | 0.110577000  |
| 1  | 2.181275000  | 3.675136000  | 0.925659000  |
| 1  | 3.723583000  | 2.996753000  | 0.414721000  |
| 1  | 2.697977000  | 3.812028000  | -0.753021000 |
| 6  | -2.170596000 | 0.403304000  | -0.179248000 |
| 15 | -3.794121000 | -0.043012000 | -0.025375000 |
| 6  | -4.968486000 | 1.324263000  | 0.083629000  |
| 1  | -5.979231000 | 0.931038000  | 0.203648000  |
| 1  | -4.725331000 | 1.955803000  | 0.938579000  |
| 1  | -4.927993000 | 1.927134000  | -0.824242000 |
| 6  | -4.066414000 | -1.048963000 | 1.445980000  |
| 1  | -5.104871000 | -1.377621000 | 1.521700000  |
| 1  | -3.411943000 | -1.922480000 | 1.388080000  |
| 1  | -3.784426000 | -0.474987000 | 2.329114000  |
| 6  | -4.409244000 | -1.084491000 | -1.369494000 |
| 1  | -4.391504000 | -0.518348000 | -2.301364000 |
| 1  | -3.741074000 | -1.942029000 | -1.472032000 |

|    |              |              |              |
|----|--------------|--------------|--------------|
| 1  | -5.423844000 | -1.435411000 | -1.169040000 |
| 31 | -0.818358000 | -1.058132000 | -0.070044000 |
| 7  | 2.757148000  | -0.413580000 | 1.400322000  |
| 7  | 3.192896000  | -0.798025000 | -1.111486000 |
| 6  | 2.644875000  | -1.835103000 | 1.697825000  |
| 1  | 1.682304000  | -2.047610000 | 2.179362000  |
| 1  | 2.710778000  | -2.428315000 | 0.786464000  |
| 1  | 3.451897000  | -2.138998000 | 2.372264000  |
| 6  | 2.481941000  | 0.414385000  | 2.565883000  |
| 1  | 3.153372000  | 0.116072000  | 3.376350000  |
| 1  | 2.654298000  | 1.464959000  | 2.339624000  |
| 1  | 1.443946000  | 0.291528000  | 2.901469000  |
| 6  | 4.595217000  | -1.080071000 | -0.895151000 |
| 1  | 4.813482000  | -2.117286000 | -1.171494000 |
| 1  | 5.232058000  | -0.428543000 | -1.506971000 |
| 1  | 4.860215000  | -0.938754000 | 0.151238000  |
| 6  | 2.793572000  | -0.882591000 | -2.503223000 |
| 1  | 1.725737000  | -0.691313000 | -2.596822000 |
| 1  | 3.340767000  | -0.160937000 | -3.122589000 |
| 1  | 3.004051000  | -1.887545000 | -2.881291000 |
| 1  | -0.641572000 | -2.072048000 | 1.136652000  |
| 1  | -0.586355000 | -1.023376000 | 1.946262000  |

**$^{11}\text{GaTS}^{\text{H-H}}$**  (T.E = -3201.049026)

|    |              |              |              |
|----|--------------|--------------|--------------|
| 7  | 0.821343000  | -0.150681000 | -0.394330000 |
| 6  | 0.862928000  | 1.248527000  | -0.223976000 |
| 6  | -1.631588000 | 1.552923000  | -0.281579000 |
| 7  | -1.890091000 | 0.260766000  | -0.003062000 |
| 15 | 2.461365000  | -0.130021000 | -0.139300000 |
| 6  | 2.217359000  | 1.582252000  | -0.141973000 |
| 6  | 3.055974000  | 2.800131000  | 0.016247000  |
| 1  | 2.817443000  | 3.578023000  | -0.711936000 |
| 1  | 2.988163000  | 3.253443000  | 1.011827000  |
| 1  | 4.106698000  | 2.543368000  | -0.138045000 |
| 6  | -3.248749000 | -0.151626000 | -0.073432000 |
| 6  | -3.579569000 | -1.267290000 | -0.831578000 |
| 6  | -4.246369000 | 0.492450000  | 0.649082000  |
| 6  | -4.882230000 | -1.733671000 | -0.869654000 |
| 1  | -2.800860000 | -1.765965000 | -1.400412000 |
| 6  | -5.546885000 | 0.026918000  | 0.605582000  |
| 1  | -3.993271000 | 1.362621000  | 1.241000000  |
| 6  | -5.872443000 | -1.087422000 | -0.151504000 |
| 1  | -5.122207000 | -2.604835000 | -1.468441000 |
| 1  | -6.314947000 | 0.538627000  | 1.174433000  |
| 1  | -6.893530000 | -1.449263000 | -0.180224000 |
| 31 | -0.614366000 | -1.109966000 | 0.489122000  |
| 7  | 3.060659000  | -0.748167000 | 1.256737000  |
| 7  | 3.204319000  | -1.014192000 | -1.311102000 |

|   |              |              |              |
|---|--------------|--------------|--------------|
| 6 | 2.940925000  | -2.173163000 | 1.530647000  |
| 1 | 2.802627000  | -2.735964000 | 0.607796000  |
| 1 | 3.845607000  | -2.535041000 | 2.028328000  |
| 1 | 2.081386000  | -2.366859000 | 2.182394000  |
| 6 | 3.101407000  | 0.063883000  | 2.465874000  |
| 1 | 3.302890000  | 1.104776000  | 2.220937000  |
| 1 | 2.148546000  | 0.010155000  | 3.006350000  |
| 1 | 3.906272000  | -0.304958000 | 3.107517000  |
| 6 | 4.602937000  | -1.389385000 | -1.253542000 |
| 1 | 4.722662000  | -2.423772000 | -1.590935000 |
| 1 | 5.209888000  | -0.749353000 | -1.904512000 |
| 1 | 4.983897000  | -1.310733000 | -0.237181000 |
| 6 | 2.658569000  | -1.011623000 | -2.657896000 |
| 1 | 1.602010000  | -0.752103000 | -2.634141000 |
| 1 | 3.188994000  | -0.298158000 | -3.298812000 |
| 1 | 2.764197000  | -2.008965000 | -3.093591000 |
| 8 | -2.440251000 | 2.395782000  | -0.595820000 |
| 7 | -0.248959000 | 1.996182000  | -0.162034000 |
| 6 | -0.063132000 | 3.439723000  | -0.097254000 |
| 1 | 0.643534000  | 3.683872000  | 0.694617000  |
| 1 | 0.304434000  | 3.835004000  | -1.046772000 |
| 1 | -1.022491000 | 3.899553000  | 0.112534000  |
| 1 | -0.403664000 | -1.688915000 | 1.921561000  |
| 1 | -0.067075000 | -0.384646000 | 2.275251000  |

**$^{13}\text{GaTS}^{\text{H-H}}$  (T.E = -3526.598350)**

|    |              |              |              |
|----|--------------|--------------|--------------|
| 7  | 1.387696000  | -0.129917000 | -0.555503000 |
| 6  | 1.225167000  | 1.297924000  | -0.540079000 |
| 6  | 0.000006000  | 1.949621000  | -0.575395000 |
| 6  | -1.225171000 | 1.297954000  | -0.540093000 |
| 1  | 0.000024000  | 3.033408000  | -0.524103000 |
| 15 | 2.956102000  | 0.143550000  | -0.116748000 |
| 6  | 2.533946000  | 1.784295000  | -0.384646000 |
| 6  | 3.045677000  | 3.161171000  | -0.196234000 |
| 1  | 2.946077000  | 3.772885000  | -1.098992000 |
| 1  | 2.520180000  | 3.692668000  | 0.608336000  |
| 1  | 4.106394000  | 3.155376000  | 0.064406000  |
| 7  | -1.387702000 | -0.129886000 | -0.555531000 |
| 6  | -2.533942000 | 1.784326000  | -0.384659000 |
| 15 | -2.956104000 | 0.143581000  | -0.116761000 |
| 6  | -3.045648000 | 3.161214000  | -0.196234000 |
| 1  | -4.106277000 | 3.155443000  | 0.064758000  |
| 1  | -2.519877000 | 3.692797000  | 0.608098000  |
| 1  | -2.946356000 | 3.772826000  | -1.099094000 |
| 7  | -3.977429000 | -0.789471000 | -1.023784000 |
| 7  | -3.396629000 | -0.243747000 | 1.430164000  |
| 6  | -3.670079000 | -0.968498000 | -2.430616000 |
| 1  | -4.213334000 | -0.247511000 | -3.053712000 |



|    |              |              |              |
|----|--------------|--------------|--------------|
| 1  | -2.601340000 | -0.844547000 | -2.598294000 |
| 1  | -3.958513000 | -1.976959000 | -2.741488000 |
| 6  | -5.381121000 | -0.959929000 | -0.714750000 |
| 1  | -6.006672000 | -0.299318000 | -1.328107000 |
| 1  | -5.683783000 | -1.992476000 | -0.918761000 |
| 1  | -5.574517000 | -0.743145000 | 0.334112000  |
| 6  | -3.355507000 | -1.639127000 | 1.848050000  |
| 1  | -4.123701000 | -1.822747000 | 2.605436000  |
| 1  | -3.536429000 | -2.302612000 | 1.002929000  |
| 1  | -2.374827000 | -1.880669000 | 2.278144000  |
| 6  | -2.991648000 | 0.659452000  | 2.499471000  |
| 1  | -1.943063000 | 0.494731000  | 2.781173000  |
| 1  | -3.114110000 | 1.696382000  | 2.191836000  |
| 1  | -3.625180000 | 0.476507000  | 3.371919000  |
| 7  | 3.977437000  | -0.789460000 | -1.023805000 |
| 7  | 3.396629000  | -0.243828000 | 1.430163000  |
| 6  | 5.381117000  | -0.959963000 | -0.714743000 |
| 1  | 5.683771000  | -1.992501000 | -0.918813000 |
| 1  | 6.006694000  | -0.299321000 | -1.328039000 |
| 1  | 5.574485000  | -0.743251000 | 0.334139000  |
| 6  | 3.670117000  | -0.968373000 | -2.430659000 |
| 1  | 2.601396000  | -0.844319000 | -2.598373000 |
| 1  | 4.213462000  | -0.247393000 | -3.053685000 |
| 1  | 3.958475000  | -1.976838000 | -2.741590000 |
| 6  | 2.991823000  | 0.659416000  | 2.499491000  |
| 1  | 3.625422000  | 0.476436000  | 3.371884000  |
| 1  | 3.114342000  | 1.696331000  | 2.191825000  |
| 1  | 1.943253000  | 0.494781000  | 2.781294000  |
| 6  | 3.355352000  | -1.639205000 | 1.848035000  |
| 1  | 3.536110000  | -2.302701000 | 1.002887000  |
| 1  | 4.123584000  | -1.822945000 | 2.605354000  |
| 1  | 2.374674000  | -1.880612000 | 2.278209000  |
| 31 | -0.000027000 | -1.354344000 | -0.054209000 |
| 1  | -0.000053000 | -2.173023000 | 1.281404000  |
| 1  | 0.000001000  | -0.977494000 | 1.994432000  |

Cartesian coordinates of the loosely associated intermediates involved in the ammonia activation by some of the representative Al(I)/Ga(I) carbenoids and also their total energies (in hartrees) including the zero point vibrational correction that have been calculated at **M06-D3/Def2-TZVP** level of theory.

**1AlInt<sup>N-H</sup>** (T.E = -987.381180)

|    |              |              |              |
|----|--------------|--------------|--------------|
| 7  | 1.429850000  | 0.432391000  | -0.521589000 |
| 6  | 1.230627000  | 1.699490000  | -0.805712000 |
| 6  | -0.000001000 | 2.323971000  | -0.965700000 |
| 7  | -1.429859000 | 0.432396000  | -0.521599000 |
| 1  | 0.000002000  | 3.366453000  | -1.251588000 |
| 1  | 2.116071000  | 2.327014000  | -0.943005000 |
| 6  | 2.749458000  | 0.023642000  | -0.238896000 |
| 6  | 3.234465000  | -1.163615000 | -0.782184000 |
| 6  | 3.564469000  | 0.754453000  | 0.622485000  |
| 6  | 4.516582000  | -1.589132000 | -0.490067000 |
| 1  | 2.593471000  | -1.737948000 | -1.440862000 |
| 6  | 4.848536000  | 0.323324000  | 0.909431000  |
| 1  | 3.175661000  | 1.658302000  | 1.081793000  |
| 6  | 5.330360000  | -0.848811000 | 0.353367000  |
| 1  | 4.885079000  | -2.509220000 | -0.928672000 |
| 1  | 5.471052000  | 0.903744000  | 1.580878000  |
| 1  | 6.333611000  | -1.188637000 | 0.581110000  |
| 6  | -2.749466000 | 0.023646000  | -0.238896000 |
| 6  | -3.234489000 | -1.163589000 | -0.782215000 |
| 6  | -3.564457000 | 0.754435000  | 0.622522000  |
| 6  | -4.516605000 | -1.589105000 | -0.490093000 |
| 1  | -2.593508000 | -1.737906000 | -1.440921000 |
| 6  | -4.848523000 | 0.323307000  | 0.909473000  |
| 1  | -3.175634000 | 1.658266000  | 1.081854000  |
| 6  | -5.330364000 | -0.848807000 | 0.353378000  |
| 1  | -4.885115000 | -2.509177000 | -0.928722000 |
| 1  | -5.471024000 | 0.903709000  | 1.580949000  |
| 1  | -6.333614000 | -1.188632000 | 0.581126000  |
| 6  | -1.230632000 | 1.699499000  | -0.805698000 |
| 1  | -2.116075000 | 2.327031000  | -0.942962000 |
| 13 | -0.000013000 | -0.981382000 | -0.102173000 |
| 7  | 0.000037000  | -0.026635000 | 1.996581000  |
| 1  | 0.818380000  | -0.354094000 | 2.499030000  |
| 1  | -0.818298000 | -0.353932000 | 2.499148000  |
| 1  | 0.000141000  | 0.989676000  | 2.018179000  |

**4AlInt<sup>N-H</sup>** (T.E = -1200.155040)

|   |             |             |              |
|---|-------------|-------------|--------------|
| 7 | 1.200827000 | 0.429129000 | -0.367031000 |
| 6 | 0.939254000 | 1.699262000 | -0.657324000 |

|    |              |              |              |
|----|--------------|--------------|--------------|
| 6  | -0.293064000 | 2.319966000  | -0.692878000 |
| 6  | -1.529235000 | 1.670079000  | -0.508802000 |
| 6  | -1.691161000 | 0.359037000  | -0.147914000 |
| 6  | 2.554608000  | 0.054769000  | -0.290655000 |
| 6  | 2.959808000  | -1.178998000 | -0.799392000 |
| 6  | 3.506856000  | 0.860069000  | 0.334990000  |
| 6  | 4.279071000  | -1.577959000 | -0.705898000 |
| 1  | 2.218068000  | -1.813689000 | -1.270574000 |
| 6  | 4.828186000  | 0.455399000  | 0.423885000  |
| 1  | 3.198904000  | 1.804715000  | 0.772900000  |
| 6  | 5.222831000  | -0.764058000 | -0.097494000 |
| 1  | 4.574814000  | -2.536969000 | -1.116109000 |
| 1  | 5.551140000  | 1.096216000  | 0.916535000  |
| 1  | 6.255980000  | -1.082444000 | -0.024665000 |
| 1  | 1.794038000  | 2.322374000  | -0.934351000 |
| 15 | -3.245610000 | -0.339735000 | -0.114295000 |
| 6  | -4.641361000 | 0.734037000  | -0.527473000 |
| 1  | -5.572832000 | 0.168196000  | -0.468233000 |
| 1  | -4.688893000 | 1.572508000  | 0.168648000  |
| 1  | -4.525295000 | 1.123467000  | -1.539639000 |
| 6  | -3.364218000 | -1.742096000 | -1.238433000 |
| 1  | -3.239675000 | -1.392995000 | -2.264080000 |
| 1  | -2.544761000 | -2.426773000 | -1.000798000 |
| 1  | -4.322371000 | -2.254987000 | -1.133085000 |
| 6  | -3.635803000 | -1.038063000 | 1.502521000  |
| 1  | -3.663180000 | -0.240097000 | 2.246263000  |
| 1  | -4.593218000 | -1.563382000 | 1.489943000  |
| 1  | -2.834167000 | -1.737122000 | 1.761610000  |
| 1  | -2.398101000 | 2.309145000  | -0.710659000 |
| 1  | -0.300714000 | 3.360244000  | -0.994660000 |
| 13 | -0.117304000 | -0.908092000 | 0.403192000  |
| 7  | 0.186376000  | 0.350409000  | 2.269465000  |
| 1  | 1.147221000  | 0.217761000  | 2.568200000  |
| 1  | -0.415458000 | 0.069949000  | 3.034734000  |
| 1  | 0.042546000  | 1.339670000  | 2.083118000  |

**6AllInt<sup>N-H</sup>** (T.E = -1330.734135)

|    |              |              |              |
|----|--------------|--------------|--------------|
| 6  | -1.531854000 | 1.301115000  | -0.004037000 |
| 6  | -1.476075000 | -0.098645000 | -0.023844000 |
| 6  | 0.960972000  | 1.548844000  | -0.203972000 |
| 1  | 1.745673000  | 2.311670000  | -0.218218000 |
| 13 | 0.061599000  | -1.345398000 | -0.500319000 |
| 7  | 1.311853000  | 0.307867000  | -0.305150000 |
| 15 | -3.075762000 | -0.701725000 | -0.039904000 |
| 6  | -4.128110000 | -0.260604000 | 1.365457000  |
| 1  | -4.231540000 | 0.822582000  | 1.400691000  |
| 1  | -5.109679000 | -0.730199000 | 1.268293000  |
| 1  | -3.652829000 | -0.606585000 | 2.284665000  |

|   |              |              |              |
|---|--------------|--------------|--------------|
| 6 | -4.050264000 | -0.264483000 | -1.499892000 |
| 1 | -3.546046000 | -0.666811000 | -2.380402000 |
| 1 | -5.060662000 | -0.674024000 | -1.438579000 |
| 1 | -4.094401000 | 0.821591000  | -1.574243000 |
| 6 | -3.091287000 | -2.504188000 | -0.030472000 |
| 1 | -2.664199000 | -2.876918000 | 0.902299000  |
| 1 | -4.119215000 | -2.861721000 | -0.121918000 |
| 1 | -2.484744000 | -2.887113000 | -0.854257000 |
| 8 | -2.523899000 | 2.034463000  | 0.069374000  |
| 7 | -0.270800000 | 2.051992000  | -0.096673000 |
| 6 | -0.417724000 | 3.498259000  | -0.079115000 |
| 1 | -0.996322000 | 3.838300000  | -0.937891000 |
| 1 | -0.947330000 | 3.816066000  | 0.817974000  |
| 1 | 0.568860000  | 3.959521000  | -0.103486000 |
| 6 | 2.696605000  | 0.039027000  | -0.222678000 |
| 6 | 3.293912000  | -0.800015000 | -1.158827000 |
| 6 | 3.461862000  | 0.545775000  | 0.823650000  |
| 6 | 4.640261000  | -1.099150000 | -1.057612000 |
| 1 | 2.682956000  | -1.208071000 | -1.955893000 |
| 6 | 4.810351000  | 0.242124000  | 0.917756000  |
| 1 | 2.985172000  | 1.163265000  | 1.579171000  |
| 6 | 5.404191000  | -0.580100000 | -0.023644000 |
| 1 | 5.098292000  | -1.744863000 | -1.797927000 |
| 1 | 5.394259000  | 0.643184000  | 1.738239000  |
| 1 | 6.457837000  | -0.821701000 | 0.050799000  |
| 7 | 0.652546000  | -1.631151000 | 1.685211000  |
| 1 | 1.643127000  | -1.828901000 | 1.787706000  |
| 1 | 0.421317000  | -0.813233000 | 2.242206000  |
| 1 | 0.144079000  | -2.424410000 | 2.058171000  |

**8AllInt<sup>N-H</sup>** (T.E = -1564.787393)

|    |              |              |              |
|----|--------------|--------------|--------------|
| 7  | -1.310953000 | -0.992244000 | -0.577909000 |
| 6  | -0.853874000 | -1.377799000 | 0.715499000  |
| 6  | 0.339202000  | -2.218983000 | 0.827667000  |
| 15 | -2.321677000 | 0.041221000  | 0.235338000  |
| 6  | -1.610480000 | -0.722140000 | 1.644853000  |
| 6  | -1.621443000 | -0.687119000 | 3.122952000  |
| 1  | -2.558063000 | -1.059758000 | 3.548522000  |
| 1  | -0.815999000 | -1.310734000 | 3.519776000  |
| 1  | -1.472267000 | 0.321981000  | 3.520968000  |
| 7  | -2.097926000 | 1.669396000  | 0.221625000  |
| 7  | -3.874352000 | -0.151130000 | -0.269070000 |
| 6  | -2.533461000 | 2.488446000  | -0.901180000 |
| 1  | -1.698188000 | 2.666608000  | -1.588325000 |
| 1  | -3.322872000 | 1.992090000  | -1.462700000 |
| 1  | -2.909955000 | 3.444434000  | -0.523230000 |
| 6  | -0.976069000 | 2.268298000  | 0.933382000  |
| 1  | -1.276661000 | 3.249645000  | 1.310581000  |

|    |              |              |              |
|----|--------------|--------------|--------------|
| 1  | -0.666958000 | 1.645866000  | 1.770508000  |
| 1  | -0.110012000 | 2.398464000  | 0.272159000  |
| 6  | -4.965134000 | 0.589493000  | 0.326992000  |
| 1  | -5.583724000 | 1.049053000  | -0.452021000 |
| 1  | -5.605846000 | -0.070307000 | 0.923244000  |
| 1  | -4.587069000 | 1.381892000  | 0.972360000  |
| 6  | -4.290921000 | -1.253311000 | -1.111441000 |
| 1  | -3.420609000 | -1.723510000 | -1.564012000 |
| 1  | -4.849417000 | -2.003289000 | -0.538902000 |
| 1  | -4.941723000 | -0.877114000 | -1.907644000 |
| 13 | -0.009000000 | -0.170025000 | -1.895996000 |
| 6  | 2.157199000  | 0.905949000  | -0.267332000 |
| 6  | 2.572915000  | 1.209572000  | 1.039955000  |
| 6  | 2.484623000  | 1.836054000  | -1.265103000 |
| 6  | 3.268117000  | 2.367733000  | 1.330754000  |
| 1  | 2.310292000  | 0.518809000  | 1.838775000  |
| 6  | 3.166479000  | 3.001168000  | -0.964660000 |
| 1  | 2.180310000  | 1.627882000  | -2.285853000 |
| 6  | 3.567334000  | 3.282166000  | 0.332182000  |
| 1  | 3.567730000  | 2.564978000  | 2.354870000  |
| 1  | 3.397137000  | 3.697852000  | -1.763929000 |
| 1  | 4.105839000  | 4.194139000  | 0.560198000  |
| 7  | 1.402745000  | -0.224244000 | -0.526781000 |
| 5  | 1.609133000  | -1.443514000 | 0.183612000  |
| 7  | 2.879105000  | -2.087734000 | 0.275782000  |
| 6  | 4.068085000  | -1.550969000 | -0.345510000 |
| 1  | 3.805046000  | -0.826067000 | -1.114344000 |
| 1  | 4.721527000  | -1.049606000 | 0.380668000  |
| 1  | 4.646976000  | -2.358211000 | -0.809832000 |
| 6  | 3.177418000  | -3.226574000 | 1.105692000  |
| 1  | 2.275639000  | -3.654240000 | 1.540144000  |
| 1  | 3.677523000  | -4.013985000 | 0.527765000  |
| 1  | 3.853545000  | -2.956752000 | 1.928775000  |
| 1  | 0.530478000  | -2.462827000 | 1.877021000  |
| 1  | 0.170411000  | -3.171415000 | 0.307168000  |
| 7  | 0.510539000  | -2.239042000 | -2.557885000 |
| 1  | 0.626815000  | -2.190077000 | -3.562629000 |
| 1  | 1.351861000  | -2.653131000 | -2.161907000 |
| 1  | -0.274400000 | -2.853415000 | -2.364224000 |

**10AllInt<sup>N-H</sup> (T.E = -1656.279472)**

|    |              |             |              |
|----|--------------|-------------|--------------|
| 7  | -0.552527000 | 0.019514000 | 0.102827000  |
| 6  | -0.585073000 | 1.127901000 | -0.803893000 |
| 6  | 0.568557000  | 1.707628000 | -1.316765000 |
| 6  | 1.864148000  | 1.325740000 | -0.935179000 |
| 1  | 0.444638000  | 2.577490000 | -1.953251000 |
| 1  | 2.637084000  | 2.013704000 | -1.301665000 |
| 15 | -2.192883000 | 0.115334000 | 0.125320000  |

|    |              |              |              |
|----|--------------|--------------|--------------|
| 6  | -1.957399000 | 1.419687000  | -0.960323000 |
| 6  | -2.685649000 | 2.448566000  | -1.737235000 |
| 1  | -2.354468000 | 3.466578000  | -1.501233000 |
| 1  | -2.572330000 | 2.323730000  | -2.822444000 |
| 1  | -3.757633000 | 2.409866000  | -1.526496000 |
| 6  | 2.232696000  | 0.226194000  | -0.185123000 |
| 15 | 3.841582000  | 0.012989000  | 0.292508000  |
| 6  | 5.058111000  | 1.216636000  | -0.303106000 |
| 1  | 6.050731000  | 0.954976000  | 0.067894000  |
| 1  | 5.075491000  | 1.223393000  | -1.393810000 |
| 1  | 4.798745000  | 2.215532000  | 0.049851000  |
| 6  | 4.499719000  | -1.597331000 | -0.198492000 |
| 1  | 5.492143000  | -1.772211000 | 0.222676000  |
| 1  | 3.806550000  | -2.362640000 | 0.165033000  |
| 1  | 4.548895000  | -1.652216000 | -1.287380000 |
| 6  | 4.036113000  | 0.008298000  | 2.087975000  |
| 1  | 3.757575000  | 0.987049000  | 2.480499000  |
| 1  | 3.346843000  | -0.737491000 | 2.493445000  |
| 1  | 5.060330000  | -0.232649000 | 2.381242000  |
| 7  | -3.108305000 | -1.153027000 | -0.432299000 |
| 7  | -2.750420000 | 0.264373000  | 1.686845000  |
| 6  | -3.226537000 | -2.383674000 | 0.330637000  |
| 1  | -2.444627000 | -3.101127000 | 0.048199000  |
| 1  | -3.124278000 | -2.183908000 | 1.395519000  |
| 1  | -4.204270000 | -2.840268000 | 0.145151000  |
| 6  | -3.201780000 | -1.362644000 | -1.860336000 |
| 1  | -4.158031000 | -1.837253000 | -2.100936000 |
| 1  | -3.133173000 | -0.412957000 | -2.389946000 |
| 1  | -2.402685000 | -2.022741000 | -2.229617000 |
| 6  | -4.160328000 | 0.546184000  | 1.876399000  |
| 1  | -4.464219000 | 0.241243000  | 2.881876000  |
| 1  | -4.379013000 | 1.618540000  | 1.766860000  |
| 1  | -4.763783000 | -0.003801000 | 1.154330000  |
| 6  | -1.904985000 | 0.974852000  | 2.630990000  |
| 1  | -0.872057000 | 0.645543000  | 2.532000000  |
| 1  | -1.948396000 | 2.062794000  | 2.480677000  |
| 1  | -2.248632000 | 0.754082000  | 3.644800000  |
| 13 | 0.866216000  | -1.247559000 | 0.439668000  |
| 7  | 0.752074000  | -1.770008000 | -1.759571000 |
| 1  | 1.594145000  | -2.236745000 | -2.075902000 |
| 1  | -0.034580000 | -2.375647000 | -1.963729000 |
| 1  | 0.646407000  | -0.903648000 | -2.284651000 |

**11AllInt<sup>N-H</sup> (T.E = -1574.090453)**

|    |              |              |             |
|----|--------------|--------------|-------------|
| 7  | -0.784396000 | -0.211380000 | 0.094493000 |
| 6  | -0.876446000 | 1.188579000  | 0.035343000 |
| 6  | 1.606692000  | 1.562940000  | 0.151150000 |
| 15 | -2.433281000 | -0.228094000 | 0.048590000 |

|    |              |              |              |
|----|--------------|--------------|--------------|
| 6  | -2.245914000 | 1.485528000  | -0.048772000 |
| 6  | -3.138261000 | 2.665279000  | -0.207688000 |
| 1  | -3.029262000 | 3.410337000  | 0.584400000  |
| 1  | -3.009098000 | 3.185718000  | -1.163259000 |
| 1  | -4.179336000 | 2.331754000  | -0.176575000 |
| 7  | -3.193571000 | -0.952548000 | -1.225311000 |
| 7  | -3.073857000 | -0.997455000 | 1.360998000  |
| 6  | -3.246729000 | -2.403932000 | -1.311070000 |
| 1  | -2.364466000 | -2.800872000 | -1.830041000 |
| 1  | -3.278459000 | -2.845942000 | -0.317135000 |
| 1  | -4.139794000 | -2.705658000 | -1.865177000 |
| 6  | -3.090958000 | -0.312366000 | -2.523783000 |
| 1  | -3.915399000 | -0.648675000 | -3.157263000 |
| 1  | -3.146595000 | 0.770661000  | -2.423020000 |
| 1  | -2.147784000 | -0.566846000 | -3.027131000 |
| 6  | -4.514082000 | -0.914580000 | 1.545282000  |
| 1  | -4.852625000 | -1.760820000 | 2.148277000  |
| 1  | -4.800985000 | 0.010819000  | 2.063215000  |
| 1  | -5.029795000 | -0.948498000 | 0.585574000  |
| 6  | -2.334915000 | -0.932535000 | 2.615308000  |
| 1  | -1.293790000 | -1.223067000 | 2.459755000  |
| 1  | -2.375396000 | 0.069892000  | 3.061700000  |
| 1  | -2.785029000 | -1.639944000 | 3.314599000  |
| 7  | 0.202722000  | 1.978774000  | 0.081019000  |
| 6  | -0.043878000 | 3.412932000  | 0.063882000  |
| 1  | -0.573511000 | 3.705020000  | -0.844272000 |
| 1  | -0.634613000 | 3.708510000  | 0.932730000  |
| 1  | 0.918168000  | 3.913688000  | 0.092177000  |
| 8  | 2.422154000  | 2.459725000  | 0.082555000  |
| 7  | 1.849662000  | 0.253782000  | 0.296125000  |
| 6  | 3.222550000  | -0.097859000 | 0.230443000  |
| 6  | 3.792046000  | -0.837574000 | 1.260225000  |
| 6  | 3.995009000  | 0.184361000  | -0.894599000 |
| 6  | 5.101356000  | -1.281499000 | 1.169233000  |
| 1  | 3.191464000  | -1.061447000 | 2.134395000  |
| 6  | 5.301260000  | -0.259751000 | -0.982714000 |
| 1  | 3.563352000  | 0.776335000  | -1.695034000 |
| 6  | 5.861610000  | -0.997355000 | 0.049148000  |
| 1  | 5.527757000  | -1.854569000 | 1.984729000  |
| 1  | 5.888514000  | -0.024184000 | -1.863371000 |
| 1  | 6.885710000  | -1.344867000 | -0.020708000 |
| 13 | 0.716474000  | -1.406982000 | 0.417122000  |
| 7  | 1.172928000  | -1.560735000 | -1.791813000 |
| 1  | 0.726128000  | -2.357828000 | -2.229479000 |
| 1  | 2.179001000  | -1.691134000 | -1.866952000 |
| 1  | 0.933221000  | -0.720077000 | -2.310920000 |

**13AllInt<sup>N-H</sup>** (T.E = -1899.636331)

|    |              |              |              |
|----|--------------|--------------|--------------|
| 7  | -1.393160000 | 0.386697000  | 0.046983000  |
| 6  | -1.263445000 | -0.211370000 | -1.252623000 |
| 6  | -0.036772000 | -0.448578000 | -1.868356000 |
| 6  | 1.170906000  | -0.320467000 | -1.192707000 |
| 1  | -0.031077000 | -0.875473000 | -2.865882000 |
| 13 | -0.041219000 | 1.071908000  | 1.265769000  |
| 15 | -2.968490000 | -0.066557000 | -0.023593000 |
| 6  | -2.577906000 | -0.542542000 | -1.627649000 |
| 6  | -3.095280000 | -1.380246000 | -2.735201000 |
| 1  | -3.173769000 | -0.840739000 | -3.685216000 |
| 1  | -2.456346000 | -2.254563000 | -2.917445000 |
| 1  | -4.096102000 | -1.757302000 | -2.507491000 |
| 7  | 1.265136000  | 0.148491000  | 0.160812000  |
| 6  | 2.497448000  | -0.623802000 | -1.555201000 |
| 15 | 2.874325000  | -0.143621000 | 0.047059000  |
| 6  | 3.099783000  | -1.171821000 | -2.792396000 |
| 1  | 2.569394000  | -2.061906000 | -3.148966000 |
| 1  | 3.107105000  | -0.454099000 | -3.623220000 |
| 1  | 4.137774000  | -1.470241000 | -2.624781000 |
| 7  | 3.972691000  | 1.087993000  | 0.215138000  |
| 7  | 3.352877000  | -1.184441000 | 1.255092000  |
| 6  | 4.258335000  | 1.680222000  | 1.508982000  |
| 1  | 3.662595000  | 2.588627000  | 1.667392000  |
| 1  | 4.021033000  | 0.981784000  | 2.309318000  |
| 1  | 5.318507000  | 1.947711000  | 1.571870000  |
| 6  | 4.208134000  | 1.987358000  | -0.892589000 |
| 1  | 3.590201000  | 2.894518000  | -0.822127000 |
| 1  | 5.255714000  | 2.304666000  | -0.896236000 |
| 1  | 3.984379000  | 1.493281000  | -1.837519000 |
| 6  | 2.389353000  | -2.182495000 | 1.690320000  |
| 1  | 2.737874000  | -2.619332000 | 2.629340000  |
| 1  | 1.417775000  | -1.720359000 | 1.860125000  |
| 1  | 2.276354000  | -2.990893000 | 0.954017000  |
| 6  | 4.707257000  | -1.701990000 | 1.204423000  |
| 1  | 4.789162000  | -2.560766000 | 0.522360000  |
| 1  | 5.402588000  | -0.931237000 | 0.872153000  |
| 1  | 5.011822000  | -2.032894000 | 2.201248000  |
| 7  | -4.006264000 | 1.156586000  | 0.402475000  |
| 7  | -3.442061000 | -1.296517000 | 0.992744000  |
| 6  | -5.436504000 | 0.920596000  | 0.427877000  |
| 1  | -5.905490000 | 1.582783000  | 1.162148000  |
| 1  | -5.895440000 | 1.120595000  | -0.549992000 |
| 1  | -5.651495000 | -0.110309000 | 0.704978000  |
| 6  | -3.663005000 | 2.500067000  | -0.018379000 |
| 1  | -2.586628000 | 2.646457000  | 0.054357000  |
| 1  | -3.982904000 | 2.700395000  | -1.050071000 |
| 1  | -4.154496000 | 3.219748000  | 0.641809000  |
| 6  | -2.839335000 | -2.591460000 | 0.715834000  |



|   |              |              |              |
|---|--------------|--------------|--------------|
| 1 | -3.366526000 | -3.358034000 | 1.288818000  |
| 1 | -2.912992000 | -2.835098000 | -0.342832000 |
| 1 | -1.777620000 | -2.613290000 | 1.004133000  |
| 6 | -3.488237000 | -1.024087000 | 2.424681000  |
| 1 | -3.901826000 | -0.036108000 | 2.618292000  |
| 1 | -4.117101000 | -1.772718000 | 2.914663000  |
| 1 | -2.483491000 | -1.059262000 | 2.867656000  |
| 7 | 0.303242000  | 2.794374000  | -0.276723000 |
| 1 | 1.287435000  | 3.027104000  | -0.196536000 |
| 1 | 0.145707000  | 2.424446000  | -1.211474000 |
| 1 | -0.225408000 | 3.651776000  | -0.169626000 |

**1GaInt<sup>N-H</sup>** (T.E = -2669.778246)

|    |              |              |              |
|----|--------------|--------------|--------------|
| 7  | -1.477011000 | 0.533042000  | -0.594486000 |
| 7  | 1.477058000  | 0.532995000  | -0.594279000 |
| 6  | -1.241112000 | 1.789104000  | -0.884336000 |
| 6  | 1.241217000  | 1.789069000  | -0.884157000 |
| 6  | 0.000072000  | 2.392997000  | -1.059605000 |
| 1  | 0.000107000  | 3.434450000  | -1.351879000 |
| 6  | -2.782536000 | 0.156748000  | -0.254879000 |
| 6  | -3.571206000 | 0.926273000  | 0.601163000  |
| 6  | -3.293570000 | -1.052067000 | -0.726809000 |
| 6  | -4.845166000 | 0.512145000  | 0.947956000  |
| 6  | -4.565242000 | -1.461453000 | -0.373900000 |
| 6  | -5.349701000 | -0.681984000 | 0.461856000  |
| 1  | -5.443705000 | 1.123752000  | 1.613804000  |
| 1  | -4.950090000 | -2.398509000 | -0.759795000 |
| 1  | -6.345587000 | -1.007363000 | 0.737590000  |
| 6  | 2.782620000  | 0.156713000  | -0.254713000 |
| 6  | 3.293617000  | -1.052102000 | -0.726662000 |
| 6  | 3.571338000  | 0.926259000  | 0.601260000  |
| 6  | 4.565329000  | -1.461469000 | -0.373860000 |
| 6  | 4.845335000  | 0.512153000  | 0.947944000  |
| 6  | 5.349849000  | -0.681972000 | 0.461808000  |
| 1  | 4.950151000  | -2.398529000 | -0.759770000 |
| 1  | 5.443926000  | 1.123775000  | 1.613731000  |
| 1  | 6.345769000  | -1.007320000 | 0.737454000  |
| 1  | 3.166106000  | 1.846949000  | 1.009724000  |
| 1  | 2.683361000  | -1.653108000 | -1.391760000 |
| 1  | -2.683375000 | -1.653045000 | -1.391988000 |
| 1  | -3.165948000 | 1.846960000  | 1.009607000  |
| 31 | -0.000030000 | -1.017644000 | -0.108323000 |
| 1  | 2.109995000  | 2.445356000  | -1.009164000 |
| 1  | -2.109863000 | 2.445405000  | -1.009484000 |
| 7  | -0.000525000 | 0.270089000  | 2.085514000  |
| 1  | 0.000016000  | 1.253728000  | 1.839052000  |
| 1  | -0.822405000 | 0.084936000  | 2.647326000  |
| 1  | 0.820766000  | 0.084155000  | 2.647931000  |

**4GaInt<sup>N-H</sup> (T.E = -2882.550125)**

|    |              |              |              |
|----|--------------|--------------|--------------|
| 7  | 1.253127000  | 0.565726000  | -0.473781000 |
| 6  | 0.971613000  | 1.844362000  | -0.669489000 |
| 6  | -0.272831000 | 2.444581000  | -0.695861000 |
| 6  | -1.506254000 | 1.791946000  | -0.527334000 |
| 6  | -1.703028000 | 0.458911000  | -0.278202000 |
| 6  | 2.598814000  | 0.209053000  | -0.331041000 |
| 6  | 3.061766000  | -0.981774000 | -0.893743000 |
| 6  | 3.497239000  | 0.980644000  | 0.410578000  |
| 6  | 4.377659000  | -1.371530000 | -0.737605000 |
| 1  | 2.369242000  | -1.587984000 | -1.466750000 |
| 6  | 4.815679000  | 0.586545000  | 0.559765000  |
| 1  | 3.145515000  | 1.889186000  | 0.889796000  |
| 6  | 5.265537000  | -0.590192000 | -0.013717000 |
| 1  | 4.716107000  | -2.296173000 | -1.191672000 |
| 1  | 5.493889000  | 1.201593000  | 1.141134000  |
| 1  | 6.296755000  | -0.899940000 | 0.107000000  |
| 1  | 1.820886000  | 2.510484000  | -0.855295000 |
| 15 | -3.272032000 | -0.161520000 | -0.084723000 |
| 6  | -4.671740000 | 0.966031000  | -0.308500000 |
| 1  | -5.610813000 | 0.429132000  | -0.161887000 |
| 1  | -4.612309000 | 1.783061000  | 0.411695000  |
| 1  | -4.652916000 | 1.384571000  | -1.315597000 |
| 6  | -3.589452000 | -1.536788000 | -1.207985000 |
| 1  | -3.559079000 | -1.175681000 | -2.236506000 |
| 1  | -2.795764000 | -2.276444000 | -1.078327000 |
| 1  | -4.557947000 | -1.999079000 | -1.006532000 |
| 6  | -3.501068000 | -0.878798000 | 1.556924000  |
| 1  | -3.410662000 | -0.091698000 | 2.306932000  |
| 1  | -4.472415000 | -1.368872000 | 1.650782000  |
| 1  | -2.704148000 | -1.607832000 | 1.724485000  |
| 1  | -2.367918000 | 2.465378000  | -0.621916000 |
| 1  | -0.287625000 | 3.505909000  | -0.912844000 |
| 31 | -0.134178000 | -0.997792000 | 0.058547000  |
| 7  | 0.315707000  | 0.326445000  | 2.353527000  |
| 1  | 1.322541000  | 0.222078000  | 2.405757000  |
| 1  | 0.120489000  | 1.270392000  | 2.038311000  |
| 1  | -0.059275000 | 0.213109000  | 3.286346000  |

**6GaInt<sup>N-H</sup> (T.E = -3013.131294)**

|    |              |              |              |
|----|--------------|--------------|--------------|
| 6  | -1.512558000 | 1.451790000  | -0.122068000 |
| 6  | -1.491562000 | 0.049971000  | -0.150445000 |
| 6  | 0.988276000  | 1.689062000  | -0.277238000 |
| 1  | 1.763325000  | 2.464211000  | -0.249569000 |
| 7  | 1.351949000  | 0.455490000  | -0.332996000 |
| 15 | -3.076539000 | -0.530006000 | 0.089047000  |
| 6  | -3.837366000 | -0.105617000 | 1.677660000  |

|    |              |              |              |
|----|--------------|--------------|--------------|
| 1  | -3.885779000 | 0.979487000  | 1.759855000  |
| 1  | -4.840178000 | -0.530881000 | 1.758462000  |
| 1  | -3.212568000 | -0.500689000 | 2.481130000  |
| 6  | -4.321134000 | -0.075439000 | -1.144215000 |
| 1  | -3.997130000 | -0.438096000 | -2.120707000 |
| 1  | -5.291253000 | -0.512519000 | -0.897906000 |
| 1  | -4.397013000 | 1.010780000  | -1.172181000 |
| 6  | -3.095228000 | -2.334374000 | 0.081915000  |
| 1  | -2.432410000 | -2.716314000 | 0.860918000  |
| 1  | -4.110039000 | -2.693673000 | 0.262794000  |
| 1  | -2.743984000 | -2.713948000 | -0.878858000 |
| 8  | -2.495140000 | 2.192234000  | 0.014442000  |
| 7  | -0.254665000 | 2.188824000  | -0.259605000 |
| 6  | -0.401080000 | 3.635788000  | -0.290965000 |
| 1  | -1.011199000 | 3.939396000  | -1.141246000 |
| 1  | -0.896550000 | 3.993915000  | 0.610767000  |
| 1  | 0.583525000  | 4.093727000  | -0.375553000 |
| 6  | 2.719649000  | 0.181028000  | -0.165381000 |
| 6  | 3.350197000  | -0.720158000 | -1.019816000 |
| 6  | 3.451939000  | 0.746739000  | 0.876892000  |
| 6  | 4.687898000  | -1.019933000 | -0.850103000 |
| 1  | 2.772396000  | -1.174591000 | -1.816507000 |
| 6  | 4.793004000  | 0.441309000  | 1.041051000  |
| 1  | 2.953501000  | 1.413172000  | 1.574539000  |
| 6  | 5.417462000  | -0.440465000 | 0.177279000  |
| 1  | 5.167551000  | -1.715910000 | -1.528740000 |
| 1  | 5.347862000  | 0.889406000  | 1.857521000  |
| 1  | 6.465049000  | -0.683782000 | 0.308198000  |
| 31 | 0.008109000  | -1.346323000 | -0.615644000 |
| 7  | 0.529382000  | -1.291866000 | 2.053873000  |
| 1  | 1.490686000  | -0.989010000 | 2.159430000  |
| 1  | -0.074560000 | -0.483104000 | 2.150073000  |
| 1  | 0.322963000  | -1.948689000 | 2.795015000  |

**8GaInt<sup>N-H</sup> (T.E = -3247.178266)**

|    |              |              |              |
|----|--------------|--------------|--------------|
| 7  | -1.407981000 | 1.071570000  | 0.443597000  |
| 6  | -0.827430000 | 1.332731000  | -0.820808000 |
| 6  | 0.333139000  | 2.218464000  | -0.936940000 |
| 15 | -2.305042000 | -0.056577000 | -0.372159000 |
| 6  | -1.441601000 | 0.544330000  | -1.764635000 |
| 6  | -1.252699000 | 0.357574000  | -3.220046000 |
| 1  | -2.161924000 | 0.551335000  | -3.797035000 |
| 1  | -0.486134000 | 1.046012000  | -3.586543000 |
| 1  | -0.919886000 | -0.653243000 | -3.481170000 |
| 7  | -2.108800000 | -1.667006000 | -0.096676000 |
| 7  | -3.916690000 | 0.181298000  | -0.092802000 |
| 6  | -2.640338000 | -2.306834000 | 1.094867000  |
| 1  | -1.843029000 | -2.476802000 | 1.827508000  |

|    |              |              |              |
|----|--------------|--------------|--------------|
| 1  | -3.402377000 | -1.684371000 | 1.561883000  |
| 1  | -3.086820000 | -3.270896000 | 0.828589000  |
| 6  | -1.000174000 | -2.402641000 | -0.686519000 |
| 1  | -1.338363000 | -3.407964000 | -0.954630000 |
| 1  | -0.633464000 | -1.902625000 | -1.580215000 |
| 1  | -0.159389000 | -2.494306000 | 0.012616000  |
| 6  | -4.922246000 | -0.675611000 | -0.686113000 |
| 1  | -5.733643000 | -0.848300000 | 0.028515000  |
| 1  | -5.355211000 | -0.218544000 | -1.584653000 |
| 1  | -4.495836000 | -1.639335000 | -0.960659000 |
| 6  | -4.402620000 | 1.510835000  | 0.221978000  |
| 1  | -3.609973000 | 2.090134000  | 0.691026000  |
| 1  | -4.746197000 | 2.036443000  | -0.678044000 |
| 1  | -5.247011000 | 1.434826000  | 0.913724000  |
| 6  | 2.135826000  | -0.911273000 | 0.097645000  |
| 6  | 2.408439000  | -1.273959000 | -1.235355000 |
| 6  | 2.509872000  | -1.836757000 | 1.087223000  |
| 6  | 2.995655000  | -2.481980000 | -1.554072000 |
| 1  | 2.113856000  | -0.585177000 | -2.024812000 |
| 6  | 3.081439000  | -3.052790000 | 0.758525000  |
| 1  | 2.345777000  | -1.579571000 | 2.128878000  |
| 6  | 3.329747000  | -3.393133000 | -0.561720000 |
| 1  | 3.184003000  | -2.722587000 | -2.595467000 |
| 1  | 3.349773000  | -3.741572000 | 1.552987000  |
| 1  | 3.783703000  | -4.344028000 | -0.812968000 |
| 7  | 1.473219000  | 0.255375000  | 0.393800000  |
| 5  | 1.636597000  | 1.459557000  | -0.342629000 |
| 7  | 2.906293000  | 2.075894000  | -0.554015000 |
| 6  | 4.131647000  | 1.518375000  | -0.031496000 |
| 1  | 3.917695000  | 0.780417000  | 0.739490000  |
| 1  | 4.724499000  | 1.028019000  | -0.815159000 |
| 1  | 4.752428000  | 2.310001000  | 0.405477000  |
| 6  | 3.154418000  | 3.217336000  | -1.395178000 |
| 1  | 2.227557000  | 3.665046000  | -1.749292000 |
| 1  | 3.713446000  | 3.990739000  | -0.852706000 |
| 1  | 3.756615000  | 2.946807000  | -2.273834000 |
| 1  | 0.505803000  | 2.467453000  | -1.988503000 |
| 1  | 0.143395000  | 3.163088000  | -0.412568000 |
| 31 | 0.071263000  | 0.123571000  | 1.928164000  |
| 7  | 0.471501000  | 2.514028000  | 2.396815000  |
| 1  | 0.497485000  | 2.720905000  | 3.386221000  |
| 1  | 1.277841000  | 2.941120000  | 1.954820000  |
| 1  | -0.372365000 | 2.911013000  | 1.999803000  |

**$^{11}\text{GaInt}^{\text{N-H}}$  (T.E = -3256.480287)**

|   |              |              |              |
|---|--------------|--------------|--------------|
| 7 | 0.912894000  | -0.100574000 | -0.456533000 |
| 6 | 0.954965000  | 1.289378000  | -0.315593000 |
| 6 | -1.540684000 | 1.637341000  | -0.426987000 |

|    |              |              |              |
|----|--------------|--------------|--------------|
| 7  | -1.798309000 | 0.323725000  | -0.393649000 |
| 15 | 2.517391000  | -0.093219000 | -0.074363000 |
| 6  | 2.298074000  | 1.620295000  | -0.053164000 |
| 6  | 3.096134000  | 2.822860000  | 0.306726000  |
| 1  | 3.293266000  | 3.493239000  | -0.536170000 |
| 1  | 2.635394000  | 3.423872000  | 1.097437000  |
| 1  | 4.074487000  | 2.510771000  | 0.682513000  |
| 6  | -3.162345000 | -0.020997000 | -0.271393000 |
| 6  | -3.703166000 | -0.966492000 | -1.138057000 |
| 6  | -3.970480000 | 0.472214000  | 0.753960000  |
| 6  | -5.006236000 | -1.409783000 | -0.985873000 |
| 1  | -3.086879000 | -1.343065000 | -1.947623000 |
| 6  | -5.270907000 | 0.028921000  | 0.902412000  |
| 1  | -3.573237000 | 1.228179000  | 1.421992000  |
| 6  | -5.797645000 | -0.916523000 | 0.035503000  |
| 1  | -5.404268000 | -2.144688000 | -1.676557000 |
| 1  | -5.882313000 | 0.429593000  | 1.703545000  |
| 1  | -6.818256000 | -1.260704000 | 0.154439000  |
| 31 | -0.634436000 | -1.446417000 | -0.236255000 |
| 7  | 2.997267000  | -0.756784000 | 1.360453000  |
| 7  | 3.369173000  | -0.963575000 | -1.187033000 |
| 6  | 2.855866000  | -2.194233000 | 1.552268000  |
| 1  | 2.992033000  | -2.725258000 | 0.611381000  |
| 1  | 3.607384000  | -2.545168000 | 2.265043000  |
| 1  | 1.858842000  | -2.438800000 | 1.941154000  |
| 6  | 2.752733000  | -0.012005000 | 2.583951000  |
| 1  | 2.939942000  | 1.049592000  | 2.435332000  |
| 1  | 1.718847000  | -0.141641000 | 2.928059000  |
| 1  | 3.424892000  | -0.379441000 | 3.363793000  |
| 6  | 4.791360000  | -1.203333000 | -1.041683000 |
| 1  | 5.035455000  | -2.204255000 | -1.410914000 |
| 1  | 5.379045000  | -0.478083000 | -1.617880000 |
| 1  | 5.089479000  | -1.139123000 | 0.003518000  |
| 6  | 2.921775000  | -0.973201000 | -2.569242000 |
| 1  | 1.841487000  | -0.849306000 | -2.615450000 |
| 1  | 3.398531000  | -0.175309000 | -3.151489000 |
| 1  | 3.183778000  | -1.932657000 | -3.023330000 |
| 8  | -2.344685000 | 2.548992000  | -0.450180000 |
| 7  | -0.140389000 | 2.057349000  | -0.427856000 |
| 6  | 0.055074000  | 3.500084000  | -0.461594000 |
| 1  | -0.010442000 | 3.943335000  | 0.535324000  |
| 1  | 1.028365000  | 3.719795000  | -0.893018000 |
| 1  | -0.723838000 | 3.944293000  | -1.073253000 |
| 7  | -0.968203000 | -0.468271000 | 2.465349000  |
| 1  | -0.837678000 | 0.534336000  | 2.383536000  |
| 1  | -1.951218000 | -0.640225000 | 2.275335000  |
| 1  | -0.803128000 | -0.724241000 | 3.431546000  |

Cartesian coordinates of the transition states involved in the ammonia activation by some of the representative Al(I) and Ga(I) carbenoids and also their total energies (in hartrees) including the zero point vibrational correction that have been calculated at **M06-D3/Def2-TZVP** level of theory.

**1AITS<sup>N-H</sup>** (T.E = -987.334775)

|    |              |              |              |
|----|--------------|--------------|--------------|
| 7  | 1.400224000  | 0.589904000  | -0.383278000 |
| 6  | 1.204875000  | 1.886824000  | -0.487154000 |
| 6  | -0.024889000 | 2.530895000  | -0.546486000 |
| 7  | -1.447847000 | 0.589853000  | -0.379596000 |
| 1  | -0.024510000 | 3.606060000  | -0.654338000 |
| 1  | 2.096313000  | 2.515872000  | -0.536017000 |
| 6  | 2.726304000  | 0.136356000  | -0.177658000 |
| 6  | 3.220381000  | -0.922213000 | -0.932277000 |
| 6  | 3.528534000  | 0.709724000  | 0.803514000  |
| 6  | 4.506198000  | -1.382805000 | -0.716445000 |
| 1  | 2.584730000  | -1.372944000 | -1.685697000 |
| 6  | 4.816000000  | 0.246324000  | 1.009926000  |
| 1  | 3.125324000  | 1.505653000  | 1.420860000  |
| 6  | 5.309773000  | -0.800332000 | 0.250278000  |
| 1  | 4.885073000  | -2.203210000 | -1.314731000 |
| 1  | 5.431298000  | 0.699258000  | 1.778723000  |
| 1  | 6.316156000  | -1.166141000 | 0.415548000  |
| 6  | -2.766845000 | 0.126768000  | -0.158698000 |
| 6  | -3.236007000 | -0.964706000 | -0.883469000 |
| 6  | -3.590710000 | 0.713964000  | 0.795798000  |
| 6  | -4.516728000 | -1.439856000 | -0.671887000 |
| 1  | -2.585649000 | -1.428100000 | -1.617651000 |
| 6  | -4.873855000 | 0.236677000  | 0.998066000  |
| 1  | -3.209609000 | 1.530429000  | 1.399530000  |
| 6  | -5.342637000 | -0.839960000 | 0.265314000  |
| 1  | -4.873909000 | -2.284505000 | -1.249431000 |
| 1  | -5.505563000 | 0.702051000  | 1.745920000  |
| 1  | -6.345149000 | -1.216492000 | 0.429674000  |
| 6  | -1.249131000 | 1.892531000  | -0.446171000 |
| 1  | -2.137722000 | 2.527377000  | -0.434016000 |
| 13 | -0.019062000 | -0.749244000 | -0.313284000 |
| 1  | 0.550635000  | -2.192873000 | 0.404620000  |
| 7  | 0.235597000  | -1.363079000 | 1.505428000  |
| 1  | -0.503448000 | -1.931565000 | 1.905633000  |
| 1  | 0.860443000  | -1.048600000 | 2.250281000  |

**4AITS<sup>N-H</sup>** (T.E = -1200.115016)

|   |             |             |              |
|---|-------------|-------------|--------------|
| 7 | 1.226307000 | 0.615320000 | -0.199135000 |
| 6 | 0.954126000 | 1.916212000 | -0.080851000 |

|    |              |              |              |
|----|--------------|--------------|--------------|
| 6  | -0.282367000 | 2.511523000  | 0.008886000  |
| 6  | -1.512872000 | 1.828285000  | 0.003328000  |
| 6  | -1.672975000 | 0.466740000  | -0.010858000 |
| 6  | 2.582271000  | 0.227708000  | -0.196356000 |
| 6  | 3.006300000  | -0.783011000 | -1.057040000 |
| 6  | 3.508866000  | 0.794952000  | 0.675829000  |
| 6  | 4.324742000  | -1.196802000 | -1.058155000 |
| 1  | 2.282419000  | -1.235224000 | -1.726873000 |
| 6  | 4.829337000  | 0.380385000  | 0.665493000  |
| 1  | 3.180671000  | 1.545568000  | 1.386387000  |
| 6  | 5.245932000  | -0.615411000 | -0.200888000 |
| 1  | 4.636657000  | -1.978915000 | -1.741029000 |
| 1  | 5.535015000  | 0.831325000  | 1.354278000  |
| 1  | 6.278898000  | -0.942520000 | -0.203060000 |
| 1  | 1.814906000  | 2.588002000  | -0.090928000 |
| 15 | -3.237698000 | -0.212936000 | -0.141737000 |
| 6  | -4.615056000 | 0.949369000  | -0.023337000 |
| 1  | -5.558605000 | 0.406350000  | -0.098909000 |
| 1  | -4.580747000 | 1.476354000  | 0.930877000  |
| 1  | -4.561675000 | 1.679140000  | -0.832021000 |
| 6  | -3.474499000 | -1.088975000 | -1.697579000 |
| 1  | -3.406059000 | -0.380981000 | -2.524367000 |
| 1  | -2.667146000 | -1.819984000 | -1.793133000 |
| 1  | -4.442123000 | -1.594609000 | -1.720457000 |
| 6  | -3.531322000 | -1.459970000 | 1.122787000  |
| 1  | -3.444933000 | -1.007020000 | 2.111390000  |
| 1  | -4.519337000 | -1.909358000 | 1.005318000  |
| 1  | -2.762906000 | -2.231375000 | 1.018673000  |
| 1  | -2.387827000 | 2.487449000  | -0.003429000 |
| 1  | -0.297030000 | 3.593589000  | 0.043215000  |
| 13 | -0.105536000 | -0.792812000 | -0.038768000 |
| 1  | -0.420257000 | -2.302582000 | 0.779022000  |
| 7  | 0.012159000  | -1.490053000 | 1.791319000  |
| 1  | 0.866172000  | -1.983451000 | 2.031006000  |
| 1  | -0.452804000 | -1.184060000 | 2.651235000  |

**6AITS<sup>N-H</sup> (T.E = -1330.694573)**

|    |              |              |              |
|----|--------------|--------------|--------------|
| 6  | -1.538200000 | 1.363897000  | -0.022077000 |
| 6  | -1.484952000 | -0.033656000 | -0.010787000 |
| 6  | 0.965555000  | 1.604331000  | -0.123364000 |
| 1  | 1.755822000  | 2.358652000  | -0.081110000 |
| 13 | 0.069550000  | -1.174637000 | -0.396349000 |
| 7  | 1.321569000  | 0.362977000  | -0.245723000 |
| 15 | -3.067620000 | -0.681838000 | -0.009163000 |
| 6  | -4.138218000 | -0.164880000 | 1.350641000  |
| 1  | -4.282546000 | 0.912897000  | 1.297686000  |
| 1  | -5.100236000 | -0.678251000 | 1.287599000  |
| 1  | -3.654764000 | -0.416739000 | 2.295466000  |

|   |              |              |              |
|---|--------------|--------------|--------------|
| 6 | -4.022628000 | -0.358582000 | -1.508293000 |
| 1 | -3.491032000 | -0.796632000 | -2.354982000 |
| 1 | -5.023479000 | -0.789846000 | -1.441229000 |
| 1 | -4.092834000 | 0.720265000  | -1.646684000 |
| 6 | -3.004129000 | -2.474827000 | 0.121744000  |
| 1 | -2.605208000 | -2.758362000 | 1.096968000  |
| 1 | -4.004471000 | -2.895441000 | 0.004767000  |
| 1 | -2.335506000 | -2.873574000 | -0.647623000 |
| 8 | -2.528016000 | 2.098052000  | -0.001158000 |
| 7 | -0.264454000 | 2.107824000  | -0.061366000 |
| 6 | -0.408169000 | 3.555237000  | -0.020149000 |
| 1 | -0.968869000 | 3.908413000  | -0.884851000 |
| 1 | -0.955280000 | 3.857268000  | 0.871770000  |
| 1 | 0.579565000  | 4.014065000  | -0.016610000 |
| 6 | 2.708417000  | 0.082789000  | -0.157808000 |
| 6 | 3.294201000  | -0.752647000 | -1.102355000 |
| 6 | 3.476410000  | 0.581323000  | 0.887163000  |
| 6 | 4.639977000  | -1.056996000 | -1.013173000 |
| 1 | 2.677588000  | -1.156866000 | -1.898019000 |
| 6 | 4.824794000  | 0.276307000  | 0.966628000  |
| 1 | 3.003879000  | 1.183626000  | 1.655805000  |
| 6 | 5.411170000  | -0.541420000 | 0.016649000  |
| 1 | 5.090513000  | -1.702371000 | -1.758202000 |
| 1 | 5.414777000  | 0.668550000  | 1.786861000  |
| 1 | 6.464767000  | -0.785249000 | 0.083430000  |
| 1 | 0.165178000  | -2.866961000 | -0.036303000 |
| 7 | 0.497370000  | -2.285189000 | 1.169380000  |
| 1 | 0.019784000  | -2.351357000 | 2.071925000  |
| 1 | 1.449863000  | -2.623188000 | 1.267635000  |

**8AITS<sup>N-H</sup> (T.E = -1564.745933)**

|    |              |              |              |
|----|--------------|--------------|--------------|
| 7  | 1.274680000  | 0.128771000  | -1.054264000 |
| 6  | 1.114473000  | 1.469885000  | -0.617103000 |
| 6  | -0.002227000 | 2.248382000  | -1.142111000 |
| 15 | 2.416039000  | -0.001350000 | 0.128986000  |
| 6  | 2.051229000  | 1.694673000  | 0.356824000  |
| 6  | 2.375274000  | 2.856039000  | 1.212609000  |
| 1  | 3.403331000  | 3.206903000  | 1.084209000  |
| 1  | 1.716259000  | 3.693280000  | 0.966764000  |
| 1  | 2.241993000  | 2.644397000  | 2.279115000  |
| 7  | 2.141379000  | -0.906156000 | 1.475542000  |
| 7  | 3.820411000  | -0.597664000 | -0.479632000 |
| 6  | 2.392624000  | -2.336693000 | 1.521716000  |
| 1  | 1.457540000  | -2.890864000 | 1.374945000  |
| 1  | 3.092072000  | -2.635396000 | 0.742982000  |
| 1  | 2.812303000  | -2.603142000 | 2.496612000  |
| 6  | 1.050470000  | -0.517034000 | 2.357245000  |
| 1  | 1.288457000  | -0.814165000 | 3.381902000  |



|    |              |              |              |
|----|--------------|--------------|--------------|
| 1  | 0.893483000  | 0.560671000  | 2.329428000  |
| 1  | 0.118660000  | -1.012157000 | 2.054375000  |
| 6  | 5.013263000  | -0.662384000 | 0.341832000  |
| 1  | 5.533008000  | -1.611500000 | 0.175819000  |
| 1  | 5.705086000  | 0.151438000  | 0.095529000  |
| 1  | 4.760550000  | -0.592163000 | 1.399805000  |
| 6  | 4.084015000  | -0.600460000 | -1.908976000 |
| 1  | 3.150729000  | -0.646299000 | -2.467633000 |
| 1  | 4.641233000  | 0.292267000  | -2.215946000 |
| 1  | 4.684419000  | -1.480551000 | -2.155719000 |
| 13 | -0.222985000 | -0.867599000 | -1.742392000 |
| 6  | -2.568842000 | -0.576442000 | -0.303427000 |
| 6  | -2.705205000 | -0.671589000 | 1.083769000  |
| 6  | -3.421109000 | -1.348018000 | -1.096565000 |
| 6  | -3.658214000 | -1.496400000 | 1.653691000  |
| 1  | -2.049174000 | -0.071028000 | 1.707416000  |
| 6  | -4.366928000 | -2.179954000 | -0.523071000 |
| 1  | -3.318978000 | -1.285318000 | -2.175109000 |
| 6  | -4.495386000 | -2.259647000 | 0.854120000  |
| 1  | -3.745633000 | -1.546860000 | 2.733758000  |
| 1  | -5.014157000 | -2.770454000 | -1.162249000 |
| 1  | -5.239301000 | -2.908759000 | 1.300416000  |
| 7  | -1.556123000 | 0.201882000  | -0.879063000 |
| 5  | -1.401381000 | 1.586667000  | -0.644376000 |
| 7  | -2.381976000 | 2.459591000  | -0.072693000 |
| 6  | -3.799091000 | 2.186552000  | -0.048776000 |
| 1  | -4.051562000 | 1.339702000  | -0.683065000 |
| 1  | -4.165635000 | 1.971170000  | 0.964696000  |
| 1  | -4.350840000 | 3.060306000  | -0.418749000 |
| 6  | -2.087162000 | 3.720488000  | 0.555983000  |
| 1  | -1.015851000 | 3.862767000  | 0.695646000  |
| 1  | -2.478275000 | 4.573633000  | -0.016915000 |
| 1  | -2.548661000 | 3.766167000  | 1.551479000  |
| 1  | 0.096847000  | 3.305412000  | -0.900051000 |
| 1  | -0.011018000 | 2.152420000  | -2.236031000 |
| 1  | -0.606944000 | -2.513843000 | -2.056501000 |
| 7  | -0.271426000 | -2.559592000 | -0.712986000 |
| 1  | 0.502205000  | -3.212167000 | -0.787566000 |
| 1  | -0.933552000 | -2.881618000 | -0.001959000 |

**10AITS<sup>N-H</sup> (T.E = -1656.241180)**

|    |              |             |              |
|----|--------------|-------------|--------------|
| 7  | -0.597103000 | 0.110336000 | 0.230119000  |
| 6  | -0.619643000 | 1.395225000 | -0.410728000 |
| 6  | 0.532179000  | 2.091973000 | -0.749307000 |
| 6  | 1.827359000  | 1.608295000 | -0.552952000 |
| 1  | 0.401340000  | 3.083655000 | -1.168590000 |
| 1  | 2.601797000  | 2.343634000 | -0.799519000 |
| 15 | -2.238684000 | 0.125239000 | 0.097220000  |

|    |              |              |              |
|----|--------------|--------------|--------------|
| 6  | -1.989666000 | 1.679413000  | -0.574253000 |
| 6  | -2.706404000 | 2.783678000  | -1.251320000 |
| 1  | -3.777694000 | 2.573522000  | -1.309999000 |
| 1  | -2.601764000 | 3.743855000  | -0.733703000 |
| 1  | -2.354201000 | 2.937493000  | -2.279670000 |
| 6  | 2.213962000  | 0.352561000  | -0.108667000 |
| 15 | 3.850942000  | 0.030086000  | 0.196447000  |
| 6  | 5.030727000  | 1.276618000  | -0.376414000 |
| 1  | 6.047366000  | 0.947026000  | -0.155626000 |
| 1  | 4.926895000  | 1.424156000  | -1.451987000 |
| 1  | 4.850217000  | 2.226300000  | 0.128427000  |
| 6  | 4.399500000  | -1.521900000 | -0.542384000 |
| 1  | 5.437279000  | -1.736982000 | -0.279494000 |
| 1  | 3.755026000  | -2.321496000 | -0.166236000 |
| 1  | 4.295744000  | -1.466869000 | -1.626941000 |
| 6  | 4.233214000  | -0.188543000 | 1.949588000  |
| 1  | 4.025274000  | 0.741613000  | 2.480002000  |
| 1  | 3.574517000  | -0.967760000 | 2.340660000  |
| 1  | 5.276687000  | -0.475320000 | 2.098842000  |
| 7  | -2.973729000 | -0.985355000 | -0.890773000 |
| 7  | -2.958362000 | -0.185301000 | 1.564082000  |
| 6  | -3.100652000 | -2.374622000 | -0.486128000 |
| 1  | -2.226365000 | -2.959435000 | -0.802781000 |
| 1  | -3.185139000 | -2.455054000 | 0.595879000  |
| 1  | -3.991529000 | -2.812246000 | -0.947039000 |
| 6  | -2.752372000 | -0.842676000 | -2.319785000 |
| 1  | -3.550389000 | -1.359334000 | -2.859839000 |
| 1  | -2.758213000 | 0.208829000  | -2.603534000 |
| 1  | -1.788747000 | -1.277796000 | -2.620501000 |
| 6  | -4.398608000 | -0.023380000 | 1.647211000  |
| 1  | -4.783528000 | -0.596356000 | 2.495358000  |
| 1  | -4.680155000 | 1.029672000  | 1.792003000  |
| 1  | -4.880804000 | -0.386542000 | 0.739775000  |
| 6  | -2.272148000 | 0.296819000  | 2.751570000  |
| 1  | -1.213668000 | 0.046333000  | 2.703682000  |
| 1  | -2.376236000 | 1.384138000  | 2.871308000  |
| 1  | -2.707069000 | -0.189517000 | 3.628143000  |
| 13 | 0.864353000  | -1.058589000 | 0.368770000  |
| 1  | 1.426936000  | -2.681632000 | 0.042625000  |
| 7  | 0.932241000  | -2.304733000 | -1.168010000 |
| 1  | 0.211247000  | -3.013750000 | -1.252246000 |
| 1  | 1.418703000  | -2.203739000 | -2.064529000 |

**11AITS<sup>N-H</sup> (T.E = -1574.048327)**

|    |              |              |             |
|----|--------------|--------------|-------------|
| 7  | -0.779575000 | -0.140001000 | 0.252173000 |
| 6  | -0.854615000 | 1.249755000  | 0.092558000 |
| 6  | 1.630330000  | 1.596079000  | 0.128284000 |
| 15 | -2.417257000 | -0.169692000 | 0.053444000 |

|    |              |              |              |
|----|--------------|--------------|--------------|
| 6  | -2.214071000 | 1.541403000  | -0.089366000 |
| 6  | -3.072458000 | 2.713859000  | -0.403044000 |
| 1  | -3.216555000 | 3.397416000  | 0.439640000  |
| 1  | -2.697214000 | 3.306589000  | -1.242863000 |
| 1  | -4.069224000 | 2.365109000  | -0.688434000 |
| 7  | -3.050904000 | -0.923880000 | -1.265644000 |
| 7  | -3.146263000 | -0.927155000 | 1.321076000  |
| 6  | -3.115403000 | -2.377970000 | -1.326703000 |
| 1  | -2.216783000 | -2.789347000 | -1.802332000 |
| 1  | -3.190141000 | -2.802030000 | -0.327347000 |
| 1  | -3.989429000 | -2.681061000 | -1.909527000 |
| 6  | -2.857459000 | -0.313368000 | -2.569963000 |
| 1  | -3.644359000 | -0.656014000 | -3.246224000 |
| 1  | -2.904528000 | 0.771911000  | -2.498481000 |
| 1  | -1.887419000 | -0.590612000 | -3.003685000 |
| 6  | -4.597802000 | -0.919677000 | 1.390924000  |
| 1  | -4.942583000 | -1.811317000 | 1.921155000  |
| 1  | -4.969064000 | -0.037307000 | 1.928046000  |
| 1  | -5.033358000 | -0.924961000 | 0.391863000  |
| 6  | -2.503846000 | -0.877097000 | 2.627122000  |
| 1  | -1.443447000 | -1.114894000 | 2.539187000  |
| 1  | -2.622014000 | 0.104866000  | 3.102903000  |
| 1  | -2.969566000 | -1.628912000 | 3.267505000  |
| 7  | 0.236649000  | 2.026471000  | 0.138065000  |
| 6  | 0.041173000  | 3.466457000  | 0.048568000  |
| 1  | 0.019200000  | 3.806563000  | -0.989583000 |
| 1  | -0.893147000 | 3.731860000  | 0.537920000  |
| 1  | 0.868255000  | 3.963163000  | 0.545475000  |
| 8  | 2.446778000  | 2.477048000  | -0.022326000 |
| 7  | 1.878284000  | 0.284891000  | 0.298731000  |
| 6  | 3.248903000  | -0.086697000 | 0.187858000  |
| 6  | 3.864996000  | -0.741086000 | 1.245433000  |
| 6  | 3.954554000  | 0.102729000  | -0.994842000 |
| 6  | 5.169839000  | -1.192759000 | 1.126372000  |
| 1  | 3.308178000  | -0.892228000 | 2.163866000  |
| 6  | 5.256753000  | -0.343685000 | -1.108908000 |
| 1  | 3.467972000  | 0.606749000  | -1.821854000 |
| 6  | 5.870923000  | -0.993971000 | -0.048725000 |
| 1  | 5.638183000  | -1.701452000 | 1.961185000  |
| 1  | 5.797498000  | -0.186721000 | -2.035432000 |
| 1  | 6.891767000  | -1.345688000 | -0.142166000 |
| 13 | 0.735730000  | -1.245471000 | 0.435290000  |
| 1  | 0.281730000  | -2.837957000 | -0.079060000 |
| 7  | 0.703348000  | -2.215283000 | -1.250824000 |
| 1  | 0.200766000  | -2.020352000 | -2.124680000 |
| 1  | 1.513748000  | -2.792379000 | -1.457350000 |

**13AITS<sup>N-H</sup> (T.E = -1899.596853)**

|    |              |              |              |
|----|--------------|--------------|--------------|
| 7  | 1.372282000  | -0.150679000 | 0.011367000  |
| 6  | 1.246292000  | 1.131327000  | -0.632555000 |
| 6  | 0.028733000  | 1.726820000  | -0.927499000 |
| 6  | -1.191952000 | 1.162766000  | -0.580911000 |
| 1  | 0.030880000  | 2.687740000  | -1.430871000 |
| 13 | 0.027049000  | -1.264430000 | 0.699288000  |
| 15 | 2.996854000  | 0.102065000  | -0.011432000 |
| 6  | 2.573978000  | 1.552635000  | -0.819215000 |
| 6  | 3.151191000  | 2.816510000  | -1.330801000 |
| 1  | 2.821737000  | 3.691672000  | -0.755593000 |
| 1  | 4.242519000  | 2.796205000  | -1.282013000 |
| 1  | 2.885864000  | 3.006303000  | -2.376468000 |
| 7  | -1.318557000 | -0.078986000 | 0.129066000  |
| 6  | -2.517817000 | 1.589090000  | -0.772905000 |
| 15 | -2.943587000 | 0.146165000  | 0.047314000  |
| 6  | -3.099576000 | 2.750863000  | -1.482630000 |
| 1  | -2.981402000 | 2.693001000  | -2.572852000 |
| 1  | -4.170445000 | 2.837565000  | -1.283716000 |
| 1  | -2.643056000 | 3.694251000  | -1.164754000 |
| 7  | -3.865504000 | -0.948215000 | -0.788902000 |
| 7  | -3.632267000 | 0.093489000  | 1.558794000  |
| 6  | -4.132514000 | -2.267202000 | -0.240291000 |
| 1  | -3.368325000 | -2.990152000 | -0.555647000 |
| 1  | -4.136057000 | -2.236274000 | 0.847775000  |
| 1  | -5.106693000 | -2.622768000 | -0.589654000 |
| 6  | -3.754272000 | -0.952798000 | -2.235142000 |
| 1  | -2.901425000 | -1.557636000 | -2.574326000 |
| 1  | -4.665203000 | -1.376155000 | -2.667157000 |
| 1  | -3.624418000 | 0.061159000  | -2.611104000 |
| 6  | -2.842575000 | 0.616476000  | 2.662743000  |
| 1  | -3.320189000 | 0.323744000  | 3.600579000  |
| 1  | -1.837815000 | 0.194901000  | 2.643635000  |
| 1  | -2.775448000 | 1.712896000  | 2.634986000  |
| 6  | -5.038694000 | 0.439062000  | 1.665780000  |
| 1  | -5.186856000 | 1.527975000  | 1.701586000  |
| 1  | -5.599388000 | 0.042688000  | 0.819505000  |
| 1  | -5.451414000 | 0.011554000  | 2.583604000  |
| 7  | 3.790051000  | -1.174980000 | -0.721576000 |
| 7  | 3.785594000  | 0.244091000  | 1.439194000  |
| 6  | 5.234703000  | -1.118881000 | -0.851723000 |
| 1  | 5.632112000  | -2.133714000 | -0.943577000 |
| 1  | 5.538021000  | -0.555085000 | -1.745226000 |
| 1  | 5.684962000  | -0.648834000 | 0.021285000  |
| 6  | 3.153874000  | -1.773352000 | -1.883857000 |
| 1  | 2.076968000  | -1.843758000 | -1.733911000 |
| 1  | 3.347598000  | -1.192433000 | -2.795619000 |
| 1  | 3.553283000  | -2.780951000 | -2.026511000 |
| 6  | 3.505957000  | 1.445594000  | 2.208343000  |

|   |              |              |              |
|---|--------------|--------------|--------------|
| 1 | 4.296002000  | 1.586297000  | 2.950400000  |
| 1 | 3.476601000  | 2.318506000  | 1.557586000  |
| 1 | 2.544918000  | 1.371617000  | 2.735713000  |
| 6 | 3.940219000  | -0.928557000 | 2.289462000  |
| 1 | 4.102211000  | -1.821765000 | 1.688847000  |
| 1 | 4.799798000  | -0.787246000 | 2.951188000  |
| 1 | 3.045254000  | -1.091798000 | 2.903965000  |
| 1 | -0.665467000 | -2.841743000 | 0.926567000  |
| 7 | -0.353746000 | -2.826035000 | -0.419893000 |
| 1 | -0.988259000 | -2.910395000 | -1.223139000 |
| 1 | 0.308133000  | -3.596637000 | -0.428212000 |

**1GaTS<sup>N-H</sup> (T.E = -2669.697094)**

|    |              |              |              |
|----|--------------|--------------|--------------|
| 7  | 1.506062000  | -0.059261000 | 0.874647000  |
| 7  | 1.459956000  | -0.021393000 | -2.063781000 |
| 6  | 2.718166000  | 0.391036000  | 0.627954000  |
| 6  | 2.687921000  | 0.392745000  | -1.843665000 |
| 6  | 3.271783000  | 0.664297000  | -0.613250000 |
| 1  | 4.277032000  | 1.061707000  | -0.624976000 |
| 6  | 1.171118000  | -0.446811000 | 2.185802000  |
| 6  | 2.075191000  | -1.124754000 | 2.999880000  |
| 6  | -0.104460000 | -0.178672000 | 2.675087000  |
| 6  | 1.718606000  | -1.495582000 | 4.283578000  |
| 6  | -0.457398000 | -0.559536000 | 3.955599000  |
| 6  | 0.452987000  | -1.213997000 | 4.769127000  |
| 1  | 2.432503000  | -2.026308000 | 4.902957000  |
| 1  | -1.452640000 | -0.337369000 | 4.322532000  |
| 1  | 0.173702000  | -1.512235000 | 5.772407000  |
| 6  | 1.089034000  | -0.385599000 | -3.375161000 |
| 6  | -0.172897000 | -0.039006000 | -3.849359000 |
| 6  | 1.946990000  | -1.109140000 | -4.198426000 |
| 6  | -0.553949000 | -0.388407000 | -5.131125000 |
| 6  | 1.560671000  | -1.450384000 | -5.481950000 |
| 6  | 0.310454000  | -1.090531000 | -5.955136000 |
| 1  | -1.536453000 | -0.105005000 | -5.490160000 |
| 1  | 2.237620000  | -2.017496000 | -6.110457000 |
| 1  | 0.006695000  | -1.364854000 | -6.958208000 |
| 1  | 2.909119000  | -1.431737000 | -3.816019000 |
| 1  | -0.845717000 | 0.523431000  | -3.211410000 |
| 1  | -0.815374000 | 0.345187000  | 2.045205000  |
| 1  | 3.051093000  | -1.390918000 | 2.609417000  |
| 31 | 0.105039000  | -0.158044000 | -0.575431000 |
| 1  | 3.318298000  | 0.543191000  | -2.723161000 |
| 1  | 3.360413000  | 0.566718000  | 1.494293000  |
| 1  | -1.417036000 | 0.363901000  | -0.920562000 |
| 7  | -0.698420000 | 1.729832000  | -0.742151000 |
| 1  | -0.512370000 | 2.458720000  | -1.427551000 |
| 1  | -1.172487000 | 2.140141000  | 0.055015000  |

**4GaTS<sup>N-H</sup> (T.E = -2882.482988)**

|    |              |              |              |
|----|--------------|--------------|--------------|
| 7  | 1.245634000  | 0.715678000  | -0.242015000 |
| 6  | 0.958938000  | 2.004671000  | -0.156735000 |
| 6  | -0.288145000 | 2.593460000  | -0.059673000 |
| 6  | -1.512619000 | 1.915847000  | -0.026478000 |
| 6  | -1.709579000 | 0.559496000  | -0.104567000 |
| 6  | 2.596625000  | 0.326836000  | -0.203789000 |
| 6  | 3.049203000  | -0.681467000 | -1.051725000 |
| 6  | 3.494331000  | 0.899850000  | 0.694960000  |
| 6  | 4.368698000  | -1.088664000 | -1.013035000 |
| 1  | 2.347074000  | -1.137983000 | -1.740204000 |
| 6  | 4.815989000  | 0.490697000  | 0.724895000  |
| 1  | 3.138935000  | 1.648805000  | 1.394448000  |
| 6  | 5.261684000  | -0.503155000 | -0.129155000 |
| 1  | 4.704615000  | -1.870558000 | -1.684728000 |
| 1  | 5.498763000  | 0.943788000  | 1.434991000  |
| 1  | 6.295379000  | -0.826692000 | -0.100329000 |
| 1  | 1.811703000  | 2.687786000  | -0.188609000 |
| 15 | -3.268814000 | -0.120458000 | -0.077293000 |
| 6  | -4.636452000 | 1.038950000  | 0.132392000  |
| 1  | -5.582646000 | 0.495231000  | 0.130620000  |
| 1  | -4.532261000 | 1.572513000  | 1.077756000  |
| 1  | -4.641060000 | 1.762841000  | -0.683326000 |
| 6  | -3.635645000 | -1.040668000 | -1.583803000 |
| 1  | -3.662956000 | -0.353692000 | -2.430203000 |
| 1  | -2.830870000 | -1.761253000 | -1.747296000 |
| 1  | -4.588300000 | -1.568100000 | -1.503637000 |
| 6  | -3.445378000 | -1.343444000 | 1.234529000  |
| 1  | -3.229648000 | -0.877711000 | 2.196588000  |
| 1  | -4.448516000 | -1.774882000 | 1.238867000  |
| 1  | -2.710150000 | -2.134112000 | 1.065928000  |
| 1  | -2.381364000 | 2.577005000  | 0.063481000  |
| 1  | -0.305420000 | 3.675138000  | -0.017845000 |
| 31 | -0.150713000 | -0.735156000 | -0.136235000 |
| 1  | 0.550481000  | -2.096425000 | 0.475399000  |
| 7  | 0.382243000  | -1.344416000 | 1.803800000  |
| 1  | 1.142819000  | -0.995379000 | 2.382922000  |
| 1  | -0.173292000 | -2.002888000 | 2.338474000  |

**6GaTS<sup>N-H</sup> (T.E = -3013.065274)**

|    |              |              |              |
|----|--------------|--------------|--------------|
| 6  | -1.545399000 | 1.472217000  | -0.052906000 |
| 6  | -1.538328000 | 0.078333000  | -0.178186000 |
| 6  | 0.955392000  | 1.705352000  | -0.189071000 |
| 1  | 1.736385000  | 2.470925000  | -0.171606000 |
| 7  | 1.323612000  | 0.470407000  | -0.253435000 |
| 15 | -3.109583000 | -0.554101000 | 0.028914000  |
| 6  | -3.845026000 | -0.259161000 | 1.652175000  |

|    |              |              |              |
|----|--------------|--------------|--------------|
| 1  | -3.915797000 | 0.816064000  | 1.812528000  |
| 1  | -4.836370000 | -0.712240000 | 1.720260000  |
| 1  | -3.190009000 | -0.693172000 | 2.409518000  |
| 6  | -4.353477000 | -0.004569000 | -1.159875000 |
| 1  | -4.035511000 | -0.290595000 | -2.163219000 |
| 1  | -5.321774000 | -0.459492000 | -0.941022000 |
| 1  | -4.429842000 | 1.080415000  | -1.102572000 |
| 6  | -3.084758000 | -2.347528000 | -0.132284000 |
| 1  | -2.447548000 | -2.780419000 | 0.640795000  |
| 1  | -4.097586000 | -2.740580000 | -0.026236000 |
| 1  | -2.683565000 | -2.631096000 | -1.106487000 |
| 8  | -2.528238000 | 2.196120000  | 0.129975000  |
| 7  | -0.284412000 | 2.206212000  | -0.148110000 |
| 6  | -0.427380000 | 3.654642000  | -0.114220000 |
| 1  | 0.557541000  | 4.112807000  | -0.189858000 |
| 1  | -1.047350000 | 3.995662000  | -0.942562000 |
| 1  | -0.909206000 | 3.971518000  | 0.809856000  |
| 6  | 2.707201000  | 0.201131000  | -0.141666000 |
| 6  | 3.320993000  | -0.632968000 | -1.068474000 |
| 6  | 3.452349000  | 0.725169000  | 0.908129000  |
| 6  | 4.668680000  | -0.916144000 | -0.954295000 |
| 1  | 2.725295000  | -1.055141000 | -1.869391000 |
| 6  | 4.802758000  | 0.438844000  | 1.014535000  |
| 1  | 2.957635000  | 1.331973000  | 1.659418000  |
| 6  | 5.415888000  | -0.380004000 | 0.082973000  |
| 1  | 5.140936000  | -1.563065000 | -1.684453000 |
| 1  | 5.373562000  | 0.848316000  | 1.839951000  |
| 1  | 6.471258000  | -0.609310000 | 0.169711000  |
| 31 | 0.017828000  | -1.130267000 | -0.369869000 |
| 1  | 1.006134000  | -2.401599000 | 0.004007000  |
| 7  | 0.735537000  | -1.952463000 | 1.430601000  |
| 1  | 0.285821000  | -2.790914000 | 1.782262000  |
| 1  | 1.380452000  | -1.600206000 | 2.137145000  |

**8GaTS<sup>N-H</sup> (T.E = -3247.109727)**

|    |              |              |              |
|----|--------------|--------------|--------------|
| 7  | -1.372580000 | -0.999914000 | -0.449956000 |
| 6  | -0.828324000 | -1.402897000 | 0.800789000  |
| 6  | 0.338264000  | -2.285410000 | 0.839652000  |
| 15 | -2.262484000 | 0.083852000  | 0.435084000  |
| 6  | -1.489387000 | -0.715888000 | 1.785475000  |
| 6  | -1.397685000 | -0.714246000 | 3.261737000  |
| 1  | -0.675505000 | -1.466221000 | 3.589487000  |
| 1  | -1.063064000 | 0.246698000  | 3.666709000  |
| 1  | -2.350237000 | -0.949007000 | 3.745093000  |
| 7  | -1.951931000 | 1.691479000  | 0.335658000  |
| 7  | -3.852792000 | -0.037670000 | 0.027651000  |
| 6  | -2.303256000 | 2.445347000  | -0.858713000 |
| 1  | -1.414857000 | 2.615234000  | -1.477857000 |

|    |              |              |              |
|----|--------------|--------------|--------------|
| 1  | -3.034047000 | 1.905220000  | -1.459266000 |
| 1  | -2.726086000 | 3.414120000  | -0.573375000 |
| 6  | -0.889875000 | 2.321065000  | 1.106828000  |
| 1  | -1.228829000 | 3.302567000  | 1.451120000  |
| 1  | -0.625613000 | 1.715452000  | 1.970949000  |
| 1  | 0.013404000  | 2.456871000  | 0.501581000  |
| 6  | -4.862029000 | 0.864488000  | 0.542308000  |
| 1  | -5.542485000 | 1.160526000  | -0.262818000 |
| 1  | -5.457058000 | 0.384332000  | 1.327940000  |
| 1  | -4.405240000 | 1.762845000  | 0.954154000  |
| 6  | -4.387585000 | -1.295881000 | -0.461075000 |
| 1  | -3.583238000 | -1.911318000 | -0.858695000 |
| 1  | -4.901855000 | -1.844448000 | 0.336783000  |
| 1  | -5.108709000 | -1.098394000 | -1.259606000 |
| 6  | 2.088051000  | 0.933187000  | -0.183307000 |
| 6  | 2.546783000  | 1.280732000  | 1.098781000  |
| 6  | 2.246401000  | 1.895036000  | -1.192363000 |
| 6  | 3.115992000  | 2.513289000  | 1.352913000  |
| 1  | 2.420091000  | 0.564361000  | 1.906710000  |
| 6  | 2.805147000  | 3.131755000  | -0.926977000 |
| 1  | 1.912709000  | 1.653684000  | -2.197042000 |
| 6  | 3.245438000  | 3.458466000  | 0.346044000  |
| 1  | 3.451542000  | 2.744117000  | 2.358659000  |
| 1  | 2.904914000  | 3.849472000  | -1.734479000 |
| 1  | 3.685902000  | 4.427000000  | 0.548808000  |
| 7  | 1.446301000  | -0.265745000 | -0.413297000 |
| 5  | 1.646638000  | -1.466927000 | 0.343085000  |
| 7  | 2.927774000  | -1.998887000 | 0.637442000  |
| 6  | 4.147438000  | -1.435773000 | 0.106946000  |
| 1  | 3.931123000  | -0.702280000 | -0.666660000 |
| 1  | 4.741469000  | -0.943219000 | 0.888080000  |
| 1  | 4.766898000  | -2.227100000 | -0.331219000 |
| 6  | 3.194716000  | -3.145015000 | 1.467374000  |
| 1  | 2.279562000  | -3.580986000 | 1.861953000  |
| 1  | 3.719620000  | -3.925020000 | 0.901552000  |
| 1  | 3.836821000  | -2.877390000 | 2.317226000  |
| 1  | 0.479948000  | -2.673887000 | 1.850563000  |
| 1  | 0.186084000  | -3.134105000 | 0.162427000  |
| 31 | 0.040208000  | -0.403978000 | -1.781758000 |
| 1  | -0.209590000 | -0.896786000 | -3.327252000 |
| 7  | 0.273919000  | -2.233245000 | -2.692271000 |
| 1  | -0.372129000 | -3.013371000 | -2.630555000 |
| 1  | 1.121493000  | -2.512318000 | -3.171313000 |

**10GaTS<sup>N-H</sup> (T.E = -3338.605606)**

|   |              |             |              |
|---|--------------|-------------|--------------|
| 7 | -0.725495000 | 0.193265000 | 0.299005000  |
| 6 | -0.756575000 | 1.573500000 | -0.055714000 |
| 6 | 0.385695000  | 2.364641000 | -0.121371000 |



|    |              |              |              |
|----|--------------|--------------|--------------|
| 6  | 1.682148000  | 1.879608000  | 0.032845000  |
| 1  | 0.247434000  | 3.407511000  | -0.384495000 |
| 1  | 2.446605000  | 2.639342000  | -0.170158000 |
| 15 | -2.340476000 | 0.166701000  | -0.017003000 |
| 6  | -2.114394000 | 1.837733000  | -0.327778000 |
| 6  | -2.806905000 | 3.025090000  | -0.878749000 |
| 1  | -2.386265000 | 3.347769000  | -1.840455000 |
| 1  | -3.865540000 | 2.814211000  | -1.049212000 |
| 1  | -2.763051000 | 3.889691000  | -0.207474000 |
| 6  | 2.115231000  | 0.606240000  | 0.377627000  |
| 15 | 3.717730000  | 0.163815000  | 0.023424000  |
| 6  | 4.973576000  | 1.426735000  | 0.348187000  |
| 1  | 5.959956000  | 1.054840000  | 0.064204000  |
| 1  | 4.759732000  | 2.324198000  | -0.233546000 |
| 1  | 4.970245000  | 1.685506000  | 1.407387000  |
| 6  | 3.948549000  | -0.307360000 | -1.700693000 |
| 1  | 4.951041000  | -0.698067000 | -1.890696000 |
| 1  | 3.176656000  | -1.056536000 | -1.923665000 |
| 1  | 3.769322000  | 0.569193000  | -2.326689000 |
| 6  | 4.227658000  | -1.277581000 | 0.970623000  |
| 1  | 4.153115000  | -1.064011000 | 2.037362000  |
| 1  | 3.563877000  | -2.112449000 | 0.737702000  |
| 1  | 5.253400000  | -1.550858000 | 0.716810000  |
| 31 | 0.832013000  | -0.886557000 | 0.724973000  |
| 7  | -2.858093000 | -0.774681000 | -1.280756000 |
| 7  | -3.197289000 | -0.457579000 | 1.262138000  |
| 6  | -2.800739000 | -2.223491000 | -1.144019000 |
| 1  | -1.791159000 | -2.603419000 | -1.352719000 |
| 1  | -3.070551000 | -2.525389000 | -0.133693000 |
| 1  | -3.497694000 | -2.684040000 | -1.849471000 |
| 6  | -2.463204000 | -0.332255000 | -2.608933000 |
| 1  | -3.084930000 | -0.837259000 | -3.352313000 |
| 1  | -2.600082000 | 0.743544000  | -2.709767000 |
| 1  | -1.410252000 | -0.568368000 | -2.817846000 |
| 6  | -4.646085000 | -0.479368000 | 1.172830000  |
| 1  | -5.042031000 | -1.239702000 | 1.851875000  |
| 1  | -5.083539000 | 0.488758000  | 1.455241000  |
| 1  | -4.966607000 | -0.720446000 | 0.159978000  |
| 6  | -2.725667000 | -0.121815000 | 2.595280000  |
| 1  | -1.641333000 | -0.206262000 | 2.644859000  |
| 1  | -3.016892000 | 0.896500000  | 2.886599000  |
| 1  | -3.162155000 | -0.823519000 | 3.310233000  |
| 1  | 0.703663000  | -2.433954000 | 0.277047000  |
| 7  | 1.188197000  | -2.195069000 | -1.242913000 |
| 1  | 1.639752000  | -3.109355000 | -1.256828000 |
| 1  | 0.369079000  | -2.293517000 | -1.843885000 |

**11GaTS<sup>N-H</sup>** (T.E = -3256.405916)

|    |              |              |              |
|----|--------------|--------------|--------------|
| 7  | -0.760824000 | -0.130369000 | 0.382857000  |
| 6  | -0.841856000 | 1.263481000  | 0.199131000  |
| 6  | 1.642505000  | 1.596227000  | 0.270931000  |
| 7  | 1.919378000  | 0.305911000  | 0.021115000  |
| 15 | -2.414100000 | -0.137363000 | 0.301743000  |
| 6  | -2.207294000 | 1.574846000  | 0.165436000  |
| 6  | -3.074244000 | 2.782651000  | 0.116831000  |
| 1  | -2.777629000 | 3.550337000  | 0.835504000  |
| 1  | -3.112574000 | 3.258326000  | -0.870090000 |
| 1  | -4.101792000 | 2.505664000  | 0.365980000  |
| 6  | 3.250663000  | -0.138405000 | 0.199648000  |
| 6  | 3.461541000  | -1.360949000 | 0.830146000  |
| 6  | 4.352062000  | 0.558325000  | -0.290431000 |
| 6  | 4.737256000  | -1.878966000 | 0.967464000  |
| 1  | 2.606292000  | -1.902368000 | 1.222658000  |
| 6  | 5.625059000  | 0.039393000  | -0.145820000 |
| 1  | 4.202497000  | 1.511327000  | -0.779364000 |
| 6  | 5.827592000  | -1.179587000 | 0.481764000  |
| 1  | 4.876888000  | -2.833021000 | 1.463033000  |
| 1  | 6.471490000  | 0.595364000  | -0.533462000 |
| 1  | 6.828643000  | -1.580064000 | 0.590787000  |
| 31 | 0.637085000  | -1.009414000 | -0.714727000 |
| 7  | -3.174055000 | -0.871029000 | -0.953833000 |
| 7  | -3.009691000 | -0.927627000 | 1.621072000  |
| 6  | -3.147363000 | -2.316874000 | -1.106022000 |
| 1  | -2.829105000 | -2.796501000 | -0.181175000 |
| 1  | -4.144432000 | -2.686162000 | -1.368468000 |
| 1  | -2.444769000 | -2.602450000 | -1.896670000 |
| 6  | -3.513691000 | -0.167810000 | -2.175320000 |
| 1  | -3.488022000 | 0.909296000  | -2.017339000 |
| 1  | -2.813530000 | -0.422222000 | -2.978787000 |
| 1  | -4.521012000 | -0.453446000 | -2.494737000 |
| 6  | -4.420302000 | -1.222076000 | 1.773075000  |
| 1  | -4.544478000 | -2.206472000 | 2.234996000  |
| 1  | -4.914111000 | -0.483242000 | 2.415931000  |
| 1  | -4.922097000 | -1.229854000 | 0.806965000  |
| 6  | -2.301139000 | -0.834967000 | 2.886427000  |
| 1  | -1.242345000 | -0.657960000 | 2.709858000  |
| 1  | -2.701458000 | -0.025924000 | 3.508960000  |
| 1  | -2.414596000 | -1.775352000 | 3.432682000  |
| 8  | 2.409599000  | 2.467296000  | 0.616291000  |
| 7  | 0.258107000  | 2.018721000  | 0.072945000  |
| 6  | 0.079247000  | 3.455920000  | -0.068936000 |
| 1  | -0.777948000 | 3.647641000  | -0.711483000 |
| 1  | -0.071175000 | 3.943111000  | 0.897168000  |
| 1  | 0.971187000  | 3.879447000  | -0.519454000 |
| 1  | -0.017654000 | -1.779708000 | -2.032034000 |
| 7  | -0.038000000 | -0.351375000 | -2.557568000 |

|   |              |              |              |
|---|--------------|--------------|--------------|
| 1 | -0.754775000 | 0.328128000  | -2.820776000 |
| 1 | 0.636941000  | -0.416863000 | -3.312649000 |

**<sup>13</sup>GaTS<sup>N-H</sup>** (T.E = -3581.951525)

|    |              |              |              |
|----|--------------|--------------|--------------|
| 7  | 1.378501000  | -0.045669000 | -0.188793000 |
| 6  | 1.240174000  | 1.345810000  | -0.515672000 |
| 6  | 0.023541000  | 2.002721000  | -0.634918000 |
| 6  | -1.207247000 | 1.373864000  | -0.487596000 |
| 1  | 0.037259000  | 3.067573000  | -0.840808000 |
| 15 | 2.997840000  | 0.224571000  | -0.108888000 |
| 6  | 2.566740000  | 1.804436000  | -0.617430000 |
| 6  | 3.128256000  | 3.147593000  | -0.886008000 |
| 1  | 2.666546000  | 3.606552000  | -1.766406000 |
| 1  | 2.988548000  | 3.850408000  | -0.053057000 |
| 1  | 4.201294000  | 3.098634000  | -1.083665000 |
| 7  | -1.359473000 | -0.018671000 | -0.186888000 |
| 6  | -2.526404000 | 1.859096000  | -0.552537000 |
| 15 | -2.974163000 | 0.267709000  | -0.088410000 |
| 6  | -3.076813000 | 3.208368000  | -0.811550000 |
| 1  | -2.443827000 | 3.750541000  | -1.520430000 |
| 1  | -4.075080000 | 3.164058000  | -1.253795000 |
| 1  | -3.153884000 | 3.835418000  | 0.087254000  |
| 7  | -3.813179000 | -0.810906000 | -1.026575000 |
| 7  | -3.699660000 | 0.081597000  | 1.392837000  |
| 6  | -3.236253000 | -1.179295000 | -2.306336000 |
| 1  | -3.616940000 | -0.544692000 | -3.116452000 |
| 1  | -2.151080000 | -1.088107000 | -2.267593000 |
| 1  | -3.493432000 | -2.218302000 | -2.535074000 |
| 6  | -5.257301000 | -0.907030000 | -0.999511000 |
| 1  | -5.713695000 | -0.312316000 | -1.801387000 |
| 1  | -5.561953000 | -1.949323000 | -1.141045000 |
| 1  | -5.649884000 | -0.558855000 | -0.045656000 |
| 6  | -3.755927000 | -1.251578000 | 1.978778000  |
| 1  | -4.598068000 | -1.311760000 | 2.674544000  |
| 1  | -3.885782000 | -2.008725000 | 1.206430000  |
| 1  | -2.830492000 | -1.482194000 | 2.522915000  |
| 6  | -3.411006000 | 1.102872000  | 2.385849000  |
| 1  | -2.413322000 | 0.968025000  | 2.826854000  |
| 1  | -3.459604000 | 2.095077000  | 1.940243000  |
| 1  | -4.151809000 | 1.040395000  | 3.187312000  |
| 7  | 3.817932000  | -0.906126000 | -1.001864000 |
| 7  | 3.736170000  | 0.098651000  | 1.373534000  |
| 6  | 5.265860000  | -0.937442000 | -1.031620000 |
| 1  | 5.610842000  | -1.969967000 | -1.147541000 |
| 1  | 5.663426000  | -0.354306000 | -1.872672000 |
| 1  | 5.680054000  | -0.536945000 | -0.107489000 |
| 6  | 3.209520000  | -1.362582000 | -2.239708000 |
| 1  | 2.124525000  | -1.372313000 | -2.143673000 |

|    |              |              |              |
|----|--------------|--------------|--------------|
| 1  | 3.489243000  | -0.722988000 | -3.086613000 |
| 1  | 3.550499000  | -2.380196000 | -2.450836000 |
| 6  | 3.451207000  | 1.155589000  | 2.329793000  |
| 1  | 4.198408000  | 1.126055000  | 3.127109000  |
| 1  | 3.492389000  | 2.130552000  | 1.846965000  |
| 1  | 2.457468000  | 1.034019000  | 2.783510000  |
| 6  | 3.826507000  | -1.207076000 | 2.011034000  |
| 1  | 3.972829000  | -1.989582000 | 1.267994000  |
| 1  | 4.672400000  | -1.219647000 | 2.704747000  |
| 1  | 2.910717000  | -1.437807000 | 2.571685000  |
| 31 | 0.002947000  | -1.180628000 | 0.593755000  |
| 1  | -0.493779000 | -2.728451000 | 0.952898000  |
| 7  | -0.265599000 | -2.900190000 | -0.537863000 |
| 1  | -0.912910000 | -3.129486000 | -1.293222000 |
| 1  | 0.487301000  | -3.581890000 | -0.526622000 |

Cartesian coordinates of the transition states involved in the hexa-fluorobenzene activation by some of the representative Al(I)/Ga(I) carbenoids and also their total energies (in hartrees) including the zero point vibrational correction that have been calculated at **M06-D3/Def2-TZVP** level of theory.

**1AITS<sup>C-F</sup>** (T.E = -1758.421085)

|   |              |              |              |
|---|--------------|--------------|--------------|
| 7 | 1.499688000  | 0.524026000  | -0.341513000 |
| 6 | 1.303905000  | 1.828620000  | -0.295124000 |
| 6 | 0.075993000  | 2.465519000  | -0.231660000 |
| 7 | -1.319975000 | 0.501626000  | -0.275292000 |
| 1 | 0.067553000  | 3.545898000  | -0.226952000 |
| 1 | 2.192222000  | 2.461456000  | -0.335968000 |
| 6 | 2.838696000  | 0.052336000  | -0.353069000 |
| 6 | 3.191859000  | -0.963550000 | -1.231963000 |
| 6 | 3.782892000  | 0.548693000  | 0.536884000  |
| 6 | 4.479036000  | -1.468679000 | -1.226451000 |
| 1 | 2.450069000  | -1.347279000 | -1.924545000 |

|    |              |              |              |
|----|--------------|--------------|--------------|
| 6  | 5.069908000  | 0.043122000  | 0.533833000  |
| 1  | 3.490869000  | 1.300488000  | 1.261959000  |
| 6  | 5.422391000  | -0.966366000 | -0.345979000 |
| 1  | 4.746154000  | -2.259472000 | -1.917280000 |
| 1  | 5.796873000  | 0.427639000  | 1.239416000  |
| 1  | 6.428525000  | -1.367662000 | -0.338826000 |
| 6  | -2.650160000 | 0.008064000  | -0.224092000 |
| 6  | -3.027293000 | -1.013884000 | -1.085915000 |
| 6  | -3.559100000 | 0.487733000  | 0.710606000  |
| 6  | -4.303317000 | -1.542267000 | -1.018302000 |
| 1  | -2.313218000 | -1.384217000 | -1.813999000 |
| 6  | -4.835416000 | -0.041026000 | 0.769547000  |
| 1  | -3.245938000 | 1.244769000  | 1.421252000  |
| 6  | -5.211684000 | -1.057209000 | -0.092505000 |
| 1  | -4.589276000 | -2.337859000 | -1.695949000 |
| 1  | -5.534161000 | 0.330437000  | 1.509784000  |
| 1  | -6.208705000 | -1.476964000 | -0.036560000 |
| 6  | -1.143240000 | 1.809233000  | -0.237282000 |
| 1  | -2.042551000 | 2.427718000  | -0.235614000 |
| 13 | 0.104967000  | -0.806561000 | -0.114231000 |
| 9  | 0.160595000  | -0.642544000 | 2.093798000  |
| 6  | 0.164756000  | -2.081761000 | 1.859429000  |
| 6  | -1.013978000 | -2.745192000 | 2.227575000  |
| 6  | 1.370532000  | -2.728268000 | 2.165122000  |
| 6  | -0.995446000 | -4.043169000 | 2.684057000  |
| 6  | 1.394393000  | -4.026181000 | 2.621573000  |
| 6  | 0.210523000  | -4.695459000 | 2.896337000  |
| 9  | -2.178921000 | -2.156893000 | 1.977505000  |
| 9  | -2.131163000 | -4.673809000 | 2.929422000  |
| 9  | 0.231972000  | -5.925995000 | 3.382768000  |
| 9  | 2.550151000  | -4.640577000 | 2.807417000  |
| 9  | 2.512174000  | -2.123256000 | 1.854504000  |

**4AITS<sup>C-F</sup> (T.E = -1971.216050)**

|   |              |             |              |
|---|--------------|-------------|--------------|
| 7 | 0.064836000  | 1.860670000 | -0.340596000 |
| 6 | -0.414385000 | 2.797989000 | 0.479551000  |
| 6 | -1.696561000 | 2.891630000 | 0.968616000  |
| 1 | -1.909092000 | 3.729234000 | 1.620605000  |
| 1 | 0.286175000  | 3.577325000 | 0.783976000  |
| 6 | 1.458770000  | 1.851117000 | -0.572451000 |
| 6 | 1.942918000  | 1.546151000 | -1.842327000 |
| 6 | 2.369306000  | 2.078861000 | 0.457067000  |
| 6 | 3.304263000  | 1.475663000 | -2.075243000 |
| 1 | 1.236146000  | 1.372026000 | -2.647310000 |
| 6 | 3.729571000  | 2.017949000 | 0.214714000  |
| 1 | 2.005251000  | 2.261583000 | 1.462652000  |
| 6 | 4.204540000  | 1.713600000 | -1.050230000 |
| 1 | 3.662764000  | 1.233525000 | -3.068859000 |

|    |              |              |              |
|----|--------------|--------------|--------------|
| 1  | 4.423485000  | 2.181529000  | 1.031067000  |
| 1  | 5.270401000  | 1.652533000  | -1.233190000 |
| 6  | -2.725408000 | 1.980004000  | 0.695913000  |
| 1  | -3.653971000 | 2.191078000  | 1.239213000  |
| 13 | -0.950853000 | 0.404016000  | -1.124450000 |
| 9  | -0.992325000 | -2.380006000 | -0.330010000 |
| 6  | 0.121758000  | -1.620075000 | -0.077968000 |
| 6  | 1.300642000  | -1.951423000 | -0.776219000 |
| 6  | 0.285375000  | -1.184358000 | 1.250488000  |
| 6  | 2.542774000  | -1.701295000 | -0.247215000 |
| 6  | 1.531943000  | -0.921564000 | 1.778065000  |
| 6  | 2.672198000  | -1.194291000 | 1.042343000  |
| 9  | 1.193683000  | -2.388054000 | -2.018047000 |
| 9  | 3.628906000  | -1.947809000 | -0.958515000 |
| 9  | 3.869885000  | -1.001237000 | 1.568371000  |
| 9  | 1.642056000  | -0.425540000 | 2.999906000  |
| 9  | -0.797416000 | -0.939273000 | 1.985421000  |
| 6  | -2.647764000 | 0.905662000  | -0.162902000 |
| 15 | -4.008500000 | -0.143694000 | -0.251874000 |
| 6  | -4.014099000 | -1.421610000 | 1.018824000  |
| 1  | -4.891180000 | -2.065340000 | 0.924965000  |
| 1  | -3.104588000 | -2.015966000 | 0.923964000  |
| 1  | -4.010103000 | -0.942794000 | 1.999735000  |
| 6  | -4.054253000 | -1.021323000 | -1.817358000 |
| 1  | -4.901450000 | -1.709217000 | -1.836521000 |
| 1  | -4.139869000 | -0.306130000 | -2.636489000 |
| 1  | -3.123742000 | -1.578994000 | -1.945133000 |
| 6  | -5.611089000 | 0.674634000  | -0.095811000 |
| 1  | -5.706094000 | 1.441185000  | -0.865473000 |
| 1  | -6.414101000 | -0.056189000 | -0.207567000 |
| 1  | -5.701372000 | 1.146464000  | 0.883204000  |

**6AITS<sup>C-F</sup> (T.E = -2101.787959)**

|   |              |             |              |
|---|--------------|-------------|--------------|
| 7 | 1.098398000  | 2.027374000 | 0.193274000  |
| 6 | 2.265631000  | 2.286365000 | -0.311363000 |
| 1 | 2.470786000  | 3.315930000 | -0.615137000 |
| 6 | 0.164714000  | 3.102831000 | 0.231303000  |
| 6 | -0.435812000 | 3.432278000 | 1.437319000  |
| 6 | -0.193567000 | 3.773348000 | -0.928745000 |
| 6 | -1.379381000 | 4.441638000 | 1.482629000  |
| 1 | -0.158939000 | 2.887334000 | 2.333186000  |
| 6 | -1.138263000 | 4.783281000 | -0.876628000 |
| 1 | 0.240323000  | 3.469525000 | -1.875496000 |
| 6 | -1.732241000 | 5.119703000 | 0.327531000  |
| 1 | -1.846619000 | 4.695594000 | 2.426547000  |
| 1 | -1.424116000 | 5.296722000 | -1.786964000 |
| 1 | -2.479616000 | 5.903038000 | 0.364309000  |
| 6 | 3.330056000  | 0.019824000 | -0.185365000 |

|    |              |              |              |
|----|--------------|--------------|--------------|
| 13 | 0.447060000  | 0.235065000  | 0.677191000  |
| 9  | -0.748601000 | 0.447854000  | -1.489254000 |
| 6  | -1.477171000 | -0.383869000 | -0.616205000 |
| 6  | -1.477640000 | -1.747486000 | -0.967762000 |
| 6  | -2.707496000 | 0.121792000  | -0.147807000 |
| 6  | -2.502771000 | -2.589951000 | -0.606373000 |
| 6  | -3.738223000 | -0.712924000 | 0.202929000  |
| 6  | -3.652492000 | -2.083557000 | -0.021129000 |
| 9  | -0.347519000 | -2.274316000 | -1.461440000 |
| 9  | -2.393452000 | -3.892677000 | -0.828384000 |
| 9  | -4.679806000 | -2.877205000 | 0.250201000  |
| 9  | -4.827420000 | -0.218646000 | 0.769407000  |
| 9  | -2.765560000 | 1.407675000  | 0.183623000  |
| 6  | 2.179573000  | -0.579833000 | 0.357246000  |
| 15 | 2.475518000  | -2.244359000 | 0.676083000  |
| 8  | 4.411530000  | -0.506288000 | -0.438973000 |
| 7  | 3.280847000  | 1.450280000  | -0.504701000 |
| 6  | 4.511391000  | 1.986077000  | -1.071787000 |
| 1  | 5.338676000  | 1.857727000  | -0.375186000 |
| 1  | 4.765145000  | 1.455781000  | -1.988164000 |
| 1  | 4.375388000  | 3.044446000  | -1.287170000 |
| 6  | 3.810523000  | -2.545481000 | 1.853013000  |
| 1  | 3.556431000  | -2.077352000 | 2.804944000  |
| 1  | 3.950417000  | -3.617952000 | 2.002238000  |
| 1  | 4.726614000  | -2.102219000 | 1.465329000  |
| 6  | 2.867300000  | -3.255902000 | -0.763395000 |
| 1  | 2.035782000  | -3.206414000 | -1.466671000 |
| 1  | 3.767190000  | -2.861459000 | -1.233493000 |
| 1  | 3.029226000  | -4.293071000 | -0.462830000 |
| 6  | 1.037574000  | -3.031828000 | 1.420702000  |
| 1  | 1.307635000  | -4.044923000 | 1.724872000  |
| 1  | 0.708600000  | -2.469802000 | 2.296474000  |
| 1  | 0.216584000  | -3.088648000 | 0.706206000  |

**8AITS<sup>C-F</sup> (T.E = -2335.835216)**

|   |              |             |              |
|---|--------------|-------------|--------------|
| 7 | 1.902443000  | 0.280215000 | -0.409717000 |
| 6 | 2.675214000  | 1.390878000 | 0.022453000  |
| 6 | 2.208249000  | 2.776543000 | -0.174881000 |
| 7 | -0.319471000 | 2.006619000 | -0.386954000 |
| 1 | 2.787354000  | 3.181238000 | -1.017199000 |
| 6 | -1.681367000 | 2.249808000 | -0.115852000 |
| 6 | -2.689612000 | 1.647374000 | -0.870616000 |
| 6 | -2.065212000 | 3.033762000 | 0.973105000  |
| 6 | -4.024606000 | 1.811631000 | -0.541225000 |
| 1 | -2.413780000 | 1.045379000 | -1.732439000 |
| 6 | -3.398690000 | 3.213510000 | 1.285958000  |
| 1 | -1.292788000 | 3.490943000 | 1.583052000  |
| 6 | -4.389941000 | 2.599309000 | 0.535753000  |

|    |              |              |              |
|----|--------------|--------------|--------------|
| 1  | -4.784061000 | 1.315646000  | -1.135783000 |
| 1  | -3.667338000 | 3.826105000  | 2.139523000  |
| 1  | -5.434124000 | 2.727311000  | 0.793566000  |
| 13 | 0.033186000  | 0.190719000  | -0.664505000 |
| 9  | -0.037070000 | -1.574923000 | 1.391040000  |
| 6  | -1.137711000 | -1.662766000 | 0.541686000  |
| 6  | -2.353858000 | -1.215122000 | 1.088209000  |
| 6  | -1.203677000 | -2.786240000 | -0.299537000 |
| 6  | -3.557792000 | -1.647787000 | 0.583360000  |
| 6  | -2.402632000 | -3.208227000 | -0.817552000 |
| 6  | -3.595674000 | -2.645649000 | -0.381488000 |
| 9  | -2.321811000 | -0.218296000 | 1.966342000  |
| 9  | -4.690220000 | -1.131325000 | 1.029359000  |
| 9  | -4.758105000 | -3.125589000 | -0.804430000 |
| 9  | -2.429759000 | -4.154454000 | -1.744192000 |
| 9  | -0.062422000 | -3.211268000 | -0.854453000 |
| 5  | 0.647760000  | 3.059514000  | -0.459249000 |
| 7  | 0.332779000  | 4.400648000  | -0.832165000 |
| 6  | -0.900897000 | 4.813197000  | -1.462453000 |
| 1  | -1.484836000 | 3.959065000  | -1.796048000 |
| 1  | -1.530185000 | 5.410240000  | -0.789335000 |
| 1  | -0.675581000 | 5.431115000  | -2.340127000 |
| 6  | 1.227297000  | 5.522077000  | -0.688295000 |
| 1  | 2.113273000  | 5.270479000  | -0.108940000 |
| 1  | 1.556507000  | 5.906699000  | -1.663591000 |
| 1  | 0.724053000  | 6.349556000  | -0.172035000 |
| 1  | 2.546313000  | 3.366020000  | 0.685948000  |
| 15 | 3.166863000  | -0.668129000 | 0.100199000  |
| 6  | 3.836155000  | 0.888607000  | 0.537903000  |
| 6  | 5.064928000  | 1.493418000  | 1.093348000  |
| 1  | 5.942318000  | 1.314196000  | 0.464131000  |
| 1  | 4.945817000  | 2.576204000  | 1.178429000  |
| 1  | 5.304739000  | 1.112893000  | 2.091335000  |
| 7  | 3.040496000  | -1.715555000 | 1.350315000  |
| 7  | 3.757213000  | -1.529883000 | -1.157474000 |
| 6  | 2.635746000  | -3.101759000 | 1.173826000  |
| 1  | 3.320730000  | -3.755667000 | 1.722053000  |
| 1  | 1.619158000  | -3.254780000 | 1.544503000  |
| 1  | 2.647930000  | -3.379802000 | 0.120806000  |
| 6  | 2.894970000  | -1.234414000 | 2.714061000  |
| 1  | 3.251238000  | -0.208296000 | 2.795676000  |
| 1  | 1.848538000  | -1.265973000 | 3.030675000  |
| 1  | 3.482726000  | -1.866458000 | 3.385606000  |
| 6  | 3.022043000  | -1.839317000 | -2.368796000 |
| 1  | 2.817954000  | -2.915508000 | -2.425995000 |
| 1  | 2.069590000  | -1.311498000 | -2.385521000 |
| 1  | 3.603400000  | -1.548621000 | -3.248974000 |
| 6  | 5.024979000  | -2.215018000 | -1.017940000 |
| 1  | 5.662046000  | -1.999245000 | -1.880816000 |



|   |             |              |              |
|---|-------------|--------------|--------------|
| 1 | 5.548420000 | -1.884708000 | -0.118666000 |
| 1 | 4.890210000 | -3.301983000 | -0.955186000 |

**10AITS<sup>C-F</sup>** (T.E = -2427.336982)

|    |              |              |              |
|----|--------------|--------------|--------------|
| 7  | -1.664604000 | 0.605944000  | 0.059141000  |
| 6  | -2.691601000 | 1.596130000  | 0.183817000  |
| 6  | -2.401085000 | 2.956854000  | 0.256908000  |
| 13 | 0.180546000  | 0.799940000  | 0.210416000  |
| 9  | 1.526311000  | -0.115818000 | -2.062325000 |
| 6  | 1.816975000  | -0.872427000 | -0.947571000 |
| 6  | 3.102420000  | -0.734866000 | -0.398881000 |
| 6  | 1.267641000  | -2.163726000 | -0.895623000 |
| 6  | 3.640126000  | -1.700169000 | 0.415512000  |
| 6  | 1.798986000  | -3.133952000 | -0.082271000 |
| 6  | 2.992386000  | -2.915512000 | 0.591412000  |
| 9  | 3.663277000  | 0.483030000  | -0.415854000 |
| 9  | 4.782122000  | -1.472764000 | 1.047834000  |
| 9  | 3.563501000  | -3.891562000 | 1.287382000  |
| 9  | 1.163441000  | -4.289439000 | 0.068250000  |
| 9  | 0.052542000  | -2.355064000 | -1.421716000 |
| 15 | -2.884159000 | -0.527593000 | 0.097960000  |
| 6  | -3.886751000 | 0.864934000  | 0.206425000  |
| 6  | -5.304315000 | 1.271510000  | 0.329685000  |
| 1  | -5.658772000 | 1.324091000  | 1.367395000  |
| 1  | -5.456870000 | 2.262602000  | -0.107061000 |
| 1  | -5.972186000 | 0.588106000  | -0.200251000 |
| 7  | -2.831435000 | -1.522483000 | -1.208256000 |
| 7  | -2.864116000 | -1.571051000 | 1.382153000  |
| 6  | -3.455659000 | -2.825074000 | -1.284967000 |
| 1  | -4.316198000 | -2.804533000 | -1.963727000 |
| 1  | -2.738248000 | -3.560221000 | -1.667095000 |
| 1  | -3.798836000 | -3.150350000 | -0.304900000 |
| 6  | -2.500133000 | -0.952000000 | -2.501032000 |
| 1  | -1.934395000 | -0.029300000 | -2.376413000 |
| 1  | -1.877355000 | -1.655868000 | -3.058966000 |
| 1  | -3.403420000 | -0.740987000 | -3.085013000 |
| 6  | -1.746894000 | -2.501823000 | 1.499102000  |
| 1  | -2.051124000 | -3.365506000 | 2.096437000  |
| 1  | -1.422382000 | -2.853103000 | 0.521005000  |
| 1  | -0.886775000 | -2.023484000 | 1.988115000  |
| 6  | -3.263817000 | -1.027640000 | 2.669724000  |
| 1  | -2.463224000 | -0.424837000 | 3.120675000  |
| 1  | -4.149635000 | -0.403179000 | 2.565652000  |
| 1  | -3.493965000 | -1.853504000 | 3.347236000  |
| 6  | -1.114369000 | 3.476761000  | 0.219118000  |
| 1  | -1.099072000 | 4.571429000  | 0.255826000  |
| 1  | -3.237367000 | 3.640632000  | 0.345800000  |
| 6  | 0.103301000  | 2.797893000  | 0.162311000  |

|    |             |             |              |
|----|-------------|-------------|--------------|
| 15 | 1.552448000 | 3.689755000 | 0.079719000  |
| 6  | 2.445107000 | 3.457346000 | -1.470851000 |
| 1  | 1.831471000 | 3.829892000 | -2.292129000 |
| 1  | 3.403252000 | 3.981389000 | -1.457594000 |
| 1  | 2.619783000 | 2.391142000 | -1.623592000 |
| 6  | 2.737742000 | 3.215632000 | 1.352587000  |
| 1  | 2.315547000 | 3.434133000 | 2.334142000  |
| 1  | 2.923799000 | 2.142406000 | 1.281963000  |
| 1  | 3.681178000 | 3.750764000 | 1.226337000  |
| 6  | 1.380530000 | 5.481786000 | 0.243393000  |
| 1  | 2.368089000 | 5.943561000 | 0.193421000  |
| 1  | 0.763870000 | 5.879777000 | -0.563182000 |
| 1  | 0.918202000 | 5.731061000 | 1.199137000  |

**11AITS<sup>C-F</sup> (T.E = -2345.136033)**

|    |              |              |              |
|----|--------------|--------------|--------------|
| 7  | -0.231374000 | -1.393589000 | -0.280016000 |
| 6  | 0.186938000  | -2.737911000 | -0.379574000 |
| 13 | 0.847846000  | 0.109774000  | -0.594388000 |
| 9  | 1.181127000  | 1.780049000  | 1.373925000  |
| 6  | 0.091015000  | 2.089787000  | 0.571861000  |
| 6  | 0.189694000  | 3.251495000  | -0.224929000 |
| 6  | -1.170032000 | 1.858858000  | 1.155886000  |
| 6  | -0.924549000 | 3.947984000  | -0.616490000 |
| 6  | -2.289430000 | 2.560797000  | 0.768262000  |
| 6  | -2.183957000 | 3.614592000  | -0.123175000 |
| 9  | 1.354896000  | 3.502848000  | -0.804104000 |
| 9  | -0.815502000 | 4.945014000  | -1.478783000 |
| 9  | -3.245984000 | 4.348813000  | -0.429819000 |
| 9  | -3.480952000 | 2.240590000  | 1.263782000  |
| 9  | -1.307081000 | 0.790937000  | 1.955603000  |
| 15 | -1.790280000 | -1.994482000 | -0.212102000 |
| 6  | -0.975904000 | -3.505097000 | -0.362476000 |
| 6  | -1.372768000 | -4.931569000 | -0.240458000 |
| 1  | -1.428270000 | -5.458620000 | -1.198483000 |
| 1  | -0.703852000 | -5.501377000 | 0.408278000  |
| 1  | -2.368801000 | -4.991770000 | 0.209762000  |
| 7  | -2.670701000 | -1.866747000 | 1.163426000  |
| 7  | -2.697481000 | -1.373517000 | -1.425797000 |
| 6  | -3.779249000 | -0.950460000 | 1.361005000  |
| 1  | -4.654528000 | -1.502993000 | 1.715958000  |
| 1  | -3.522319000 | -0.187411000 | 2.098505000  |
| 1  | -4.040616000 | -0.443069000 | 0.435180000  |
| 6  | -2.158442000 | -2.429450000 | 2.401788000  |
| 1  | -2.972149000 | -2.914302000 | 2.948172000  |
| 1  | -1.387792000 | -3.171193000 | 2.193115000  |
| 1  | -1.730293000 | -1.644908000 | 3.033591000  |
| 6  | -2.629426000 | 0.008464000  | -1.860480000 |
| 1  | -3.494064000 | 0.586524000  | -1.507386000 |

|   |              |              |              |
|---|--------------|--------------|--------------|
| 1 | -1.723099000 | 0.494495000  | -1.489071000 |
| 1 | -2.609455000 | 0.053795000  | -2.952932000 |
| 6 | -3.862590000 | -2.109998000 | -1.870439000 |
| 1 | -3.915455000 | -2.092806000 | -2.962731000 |
| 1 | -3.798698000 | -3.153396000 | -1.553563000 |
| 1 | -4.793857000 | -1.685175000 | -1.474756000 |
| 6 | 2.634341000  | -2.221078000 | -0.245104000 |
| 8 | 3.688929000  | -2.782249000 | -0.071385000 |
| 6 | 3.567664000  | -0.069158000 | -0.061570000 |
| 6 | 3.936774000  | 0.860096000  | -1.022527000 |
| 6 | 4.256826000  | -0.114093000 | 1.143563000  |
| 6 | 4.977339000  | 1.742470000  | -0.780617000 |
| 1 | 3.400082000  | 0.888285000  | -1.965261000 |
| 6 | 5.300999000  | 0.758807000  | 1.376796000  |
| 1 | 3.962911000  | -0.837393000 | 1.894740000  |
| 6 | 5.663440000  | 1.693337000  | 0.418093000  |
| 1 | 5.250133000  | 2.468677000  | -1.537272000 |
| 1 | 5.832479000  | 0.716260000  | 2.320547000  |
| 1 | 6.477857000  | 2.382036000  | 0.609398000  |
| 7 | 2.420920000  | -0.888112000 | -0.292793000 |
| 7 | 1.483146000  | -3.076340000 | -0.471554000 |
| 6 | 1.801646000  | -4.486987000 | -0.647545000 |
| 1 | 1.882469000  | -5.006038000 | 0.309977000  |
| 1 | 1.027207000  | -4.953108000 | -1.252855000 |
| 1 | 2.758803000  | -4.569787000 | -1.152774000 |

**13AITS<sup>C-F</sup>** (T.E = -2670.691503)

|    |              |              |              |
|----|--------------|--------------|--------------|
| 7  | -0.510759000 | -1.688743000 | -0.169840000 |
| 6  | 0.208108000  | -2.934840000 | -0.281160000 |
| 6  | 1.592992000  | -2.999726000 | -0.354915000 |
| 7  | 1.896311000  | -0.523816000 | -0.278890000 |
| 1  | 2.067165000  | -3.972597000 | -0.422641000 |
| 6  | 2.405204000  | -1.874256000 | -0.316805000 |
| 13 | 0.127668000  | 0.038905000  | -0.404529000 |
| 9  | -0.150630000 | 1.464434000  | 1.849258000  |
| 6  | -0.882572000 | 2.004276000  | 0.802735000  |
| 6  | -0.409405000 | 3.197189000  | 0.231234000  |
| 6  | -2.277695000 | 1.866237000  | 0.881052000  |
| 6  | -1.246593000 | 4.030173000  | -0.469246000 |
| 6  | -3.118316000 | 2.695802000  | 0.178958000  |
| 6  | -2.614606000 | 3.792744000  | -0.504402000 |
| 9  | 0.911429000  | 3.346224000  | 0.101212000  |
| 9  | -0.750166000 | 5.065681000  | -1.128374000 |
| 9  | -3.433823000 | 4.653572000  | -1.094126000 |
| 9  | -4.420950000 | 2.448979000  | 0.154851000  |
| 9  | -2.772640000 | 0.744530000  | 1.417648000  |
| 15 | 3.466149000  | -0.035238000 | -0.091358000 |
| 6  | 3.795184000  | -1.711165000 | -0.276770000 |

|    |              |              |              |
|----|--------------|--------------|--------------|
| 6  | 4.896495000  | -2.694723000 | -0.164175000 |
| 1  | 5.060797000  | -3.256355000 | -1.089850000 |
| 1  | 5.841544000  | -2.202602000 | 0.077136000  |
| 1  | 4.707164000  | -3.431389000 | 0.626656000  |
| 7  | 3.844486000  | 1.174637000  | -1.146223000 |
| 7  | 3.893956000  | 0.612514000  | 1.370433000  |
| 6  | 5.049760000  | 1.971886000  | -1.046318000 |
| 1  | 5.786640000  | 1.662825000  | -1.797124000 |
| 1  | 4.813834000  | 3.027341000  | -1.219170000 |
| 1  | 5.500140000  | 1.874761000  | -0.060561000 |
| 6  | 3.264808000  | 1.178289000  | -2.475935000 |
| 1  | 3.986456000  | 0.826409000  | -3.222278000 |
| 1  | 2.384501000  | 0.538995000  | -2.511850000 |
| 1  | 2.959377000  | 2.195612000  | -2.739329000 |
| 6  | 3.374573000  | 1.917271000  | 1.761881000  |
| 1  | 2.411868000  | 1.816199000  | 2.277015000  |
| 1  | 4.083293000  | 2.406345000  | 2.436301000  |
| 1  | 3.217900000  | 2.554610000  | 0.894611000  |
| 6  | 3.970117000  | -0.301720000 | 2.498498000  |
| 1  | 2.971113000  | -0.548188000 | 2.884164000  |
| 1  | 4.469962000  | -1.226566000 | 2.216302000  |
| 1  | 4.539359000  | 0.173176000  | 3.301329000  |
| 15 | -1.899478000 | -2.590700000 | -0.126795000 |
| 6  | -0.801064000 | -3.905864000 | -0.267452000 |
| 6  | -0.763209000 | -5.383321000 | -0.342212000 |
| 1  | -0.869462000 | -5.773844000 | -1.362208000 |
| 1  | 0.188590000  | -5.759606000 | 0.043268000  |
| 1  | -1.551261000 | -5.843817000 | 0.258854000  |
| 7  | -2.777622000 | -2.283856000 | 1.229346000  |
| 7  | -2.983302000 | -2.321122000 | -1.350679000 |
| 6  | -2.624530000 | -2.850315000 | -2.656459000 |
| 1  | -3.515321000 | -2.870508000 | -3.288921000 |
| 1  | -1.864686000 | -2.228821000 | -3.150796000 |
| 1  | -2.236397000 | -3.863776000 | -2.566895000 |
| 6  | -3.590280000 | -0.997317000 | -1.442478000 |
| 1  | -4.527138000 | -1.062284000 | -2.002012000 |
| 1  | -3.803328000 | -0.590308000 | -0.454759000 |
| 1  | -2.923030000 | -0.292445000 | -1.959117000 |
| 6  | -4.194070000 | -2.527712000 | 1.387051000  |
| 1  | -4.686236000 | -1.630979000 | 1.781474000  |
| 1  | -4.652497000 | -2.787131000 | 0.434953000  |
| 1  | -4.370463000 | -3.349372000 | 2.090807000  |
| 6  | -2.067906000 | -2.106439000 | 2.482644000  |
| 1  | -2.533486000 | -1.299065000 | 3.054121000  |
| 1  | -2.091561000 | -3.022312000 | 3.084300000  |
| 1  | -1.029760000 | -1.831459000 | 2.296959000  |

**1GaTS<sup>C-F</sup>** (T.E = -3440.794017)

|    |              |              |              |
|----|--------------|--------------|--------------|
| 7  | 1.347540000  | -2.220528000 | -0.018215000 |
| 6  | 1.095966000  | -3.344742000 | -0.657612000 |
| 6  | -0.151276000 | -3.841333000 | -0.999987000 |
| 7  | -1.544680000 | -2.120313000 | -0.033622000 |
| 1  | -0.181963000 | -4.793171000 | -1.510655000 |
| 1  | 1.960669000  | -3.958485000 | -0.918854000 |
| 6  | 2.690578000  | -1.850992000 | 0.230260000  |
| 6  | 3.033703000  | -1.360351000 | 1.483710000  |
| 6  | 3.653753000  | -1.914542000 | -0.768797000 |
| 6  | 4.327828000  | -0.945751000 | 1.737063000  |
| 1  | 2.276836000  | -1.316448000 | 2.260481000  |
| 6  | 4.947792000  | -1.503146000 | -0.507510000 |
| 1  | 3.372450000  | -2.243934000 | -1.762841000 |
| 6  | 5.289608000  | -1.017428000 | 0.743440000  |
| 1  | 4.586068000  | -0.565404000 | 2.718165000  |
| 1  | 5.690114000  | -1.543044000 | -1.295920000 |
| 1  | 6.301796000  | -0.685948000 | 0.940540000  |
| 6  | -2.862043000 | -1.648979000 | 0.179508000  |
| 6  | -3.218492000 | -1.184602000 | 1.438731000  |
| 6  | -3.781258000 | -1.592530000 | -0.860566000 |
| 6  | -4.485946000 | -0.678370000 | 1.657666000  |
| 1  | -2.493793000 | -1.232505000 | 2.245187000  |
| 6  | -5.048935000 | -1.088404000 | -0.633927000 |
| 1  | -3.481438000 | -1.904386000 | -1.854971000 |
| 6  | -5.405513000 | -0.630314000 | 0.623305000  |
| 1  | -4.756541000 | -0.319028000 | 2.643332000  |
| 1  | -5.756996000 | -1.035104000 | -1.452481000 |
| 1  | -6.396028000 | -0.226620000 | 0.794266000  |
| 6  | -1.365093000 | -3.254029000 | -0.678660000 |
| 1  | -2.268429000 | -3.797836000 | -0.963705000 |
| 9  | -0.087548000 | 0.110247000  | -1.556783000 |
| 6  | 0.038721000  | 1.192650000  | -0.401106000 |
| 6  | -1.096912000 | 1.997144000  | -0.285977000 |
| 6  | 1.271135000  | 1.849530000  | -0.430660000 |
| 6  | -1.005038000 | 3.359705000  | -0.099526000 |
| 6  | 1.371978000  | 3.211629000  | -0.244627000 |
| 6  | 0.232234000  | 3.984418000  | -0.087666000 |
| 9  | -2.292913000 | 1.414455000  | -0.243340000 |
| 9  | -2.102513000 | 4.077839000  | 0.069454000  |
| 9  | 0.322879000  | 5.297791000  | 0.057712000  |
| 9  | 2.562068000  | 3.787609000  | -0.220890000 |
| 9  | 2.382198000  | 1.124948000  | -0.542622000 |
| 31 | -0.055712000 | -0.862760000 | 0.381490000  |

**6GaTS<sup>C-F</sup>** (T.E = -3784.170554)

|   |             |             |             |
|---|-------------|-------------|-------------|
| 7 | 1.151094000 | 1.983720000 | 0.082339000 |
|---|-------------|-------------|-------------|

|    |              |              |              |
|----|--------------|--------------|--------------|
| 6  | 2.350990000  | 2.214105000  | -0.336135000 |
| 1  | 2.606036000  | 3.242562000  | -0.605523000 |
| 6  | 0.244345000  | 3.078391000  | 0.112297000  |
| 6  | -0.360169000 | 3.418388000  | 1.312575000  |
| 6  | -0.081930000 | 3.759944000  | -1.050272000 |
| 6  | -1.272774000 | 4.455558000  | 1.352421000  |
| 1  | -0.112190000 | 2.858154000  | 2.207620000  |
| 6  | -0.998409000 | 4.795756000  | -1.004071000 |
| 1  | 0.354213000  | 3.444081000  | -1.991835000 |
| 6  | -1.593132000 | 5.146832000  | 0.195633000  |
| 1  | -1.744516000 | 4.718536000  | 2.291569000  |
| 1  | -1.261430000 | 5.319040000  | -1.915667000 |
| 1  | -2.317640000 | 5.951574000  | 0.227239000  |
| 6  | 3.371661000  | -0.076029000 | -0.187093000 |
| 9  | -0.854428000 | 0.461359000  | -1.532353000 |
| 6  | -1.514143000 | -0.375644000 | -0.487953000 |
| 6  | -1.653248000 | -1.715358000 | -0.904605000 |
| 6  | -2.686609000 | 0.183371000  | 0.061647000  |
| 6  | -2.779887000 | -2.466945000 | -0.661973000 |
| 6  | -3.819524000 | -0.555960000 | 0.299928000  |
| 6  | -3.891742000 | -1.894201000 | -0.067224000 |
| 9  | -0.565592000 | -2.327631000 | -1.418327000 |
| 9  | -2.803579000 | -3.746616000 | -1.012089000 |
| 9  | -5.014431000 | -2.587910000 | 0.096783000  |
| 9  | -4.859804000 | 0.008094000  | 0.896602000  |
| 9  | -2.613841000 | 1.430597000  | 0.537548000  |
| 6  | 2.199653000  | -0.690486000 | 0.294264000  |
| 15 | 2.445180000  | -2.365621000 | 0.601998000  |
| 8  | 4.450505000  | -0.625188000 | -0.398006000 |
| 7  | 3.359609000  | 1.351041000  | -0.483635000 |
| 6  | 4.629763000  | 1.870525000  | -0.977311000 |
| 1  | 5.419192000  | 1.704337000  | -0.245825000 |
| 1  | 4.915368000  | 1.360093000  | -1.895688000 |
| 1  | 4.528362000  | 2.936999000  | -1.169477000 |
| 6  | 3.761298000  | -2.717832000 | 1.783307000  |
| 1  | 3.524956000  | -2.235776000 | 2.732795000  |
| 1  | 3.849254000  | -3.795269000 | 1.936231000  |
| 1  | 4.698224000  | -2.318049000 | 1.398879000  |
| 6  | 2.806982000  | -3.365965000 | -0.851241000 |
| 1  | 1.971403000  | -3.288318000 | -1.547753000 |
| 1  | 3.711465000  | -2.983091000 | -1.322929000 |
| 1  | 2.950772000  | -4.410690000 | -0.568563000 |
| 6  | 0.972156000  | -3.096293000 | 1.332477000  |
| 1  | 1.184708000  | -4.132468000 | 1.601580000  |
| 1  | 0.688939000  | -2.546299000 | 2.231422000  |
| 1  | 0.143935000  | -3.081134000 | 0.624127000  |
| 31 | 0.429861000  | 0.111233000  | 0.437466000  |

**8GaTS<sup>C-F</sup>** (T.E = -4018.210894)

|    |              |              |              |
|----|--------------|--------------|--------------|
| 7  | 0.957417000  | -1.425861000 | -0.825717000 |
| 6  | 2.380281000  | -1.470765000 | -0.852426000 |
| 6  | 3.111145000  | -0.467866000 | -1.620068000 |
| 7  | 1.615175000  | 1.438739000  | -0.718640000 |
| 1  | 2.652525000  | -0.387935000 | -2.613743000 |
| 6  | 1.289811000  | 2.635920000  | -0.048155000 |
| 6  | 0.653785000  | 3.679586000  | -0.714683000 |
| 6  | 1.559619000  | 2.782300000  | 1.310751000  |
| 6  | 0.336370000  | 4.851818000  | -0.052249000 |
| 1  | 0.423805000  | 3.557867000  | -1.768630000 |
| 6  | 1.244946000  | 3.955843000  | 1.970897000  |
| 1  | 2.034578000  | 1.957870000  | 1.834599000  |
| 6  | 0.637029000  | 4.999747000  | 1.291359000  |
| 1  | -0.155735000 | 5.654419000  | -0.589657000 |
| 1  | 1.469404000  | 4.054344000  | 3.027145000  |
| 1  | 0.386441000  | 5.917315000  | 1.809965000  |
| 9  | -0.987368000 | 0.155793000  | 1.191772000  |
| 6  | -1.992379000 | 0.340318000  | 0.125495000  |
| 6  | -2.703866000 | 1.549782000  | 0.237042000  |
| 6  | -2.784459000 | -0.791466000 | -0.130662000 |
| 6  | -4.048201000 | 1.638304000  | -0.039375000 |
| 6  | -4.129243000 | -0.711164000 | -0.413455000 |
| 6  | -4.786317000 | 0.505860000  | -0.357054000 |
| 9  | -2.019195000 | 2.663150000  | 0.480943000  |
| 9  | -4.654170000 | 2.813841000  | 0.012243000  |
| 9  | -6.096296000 | 0.582755000  | -0.557205000 |
| 9  | -4.798836000 | -1.807215000 | -0.741668000 |
| 9  | -2.161615000 | -1.970138000 | -0.317836000 |
| 5  | 2.945402000  | 0.998298000  | -0.951796000 |
| 7  | 4.134257000  | 1.752089000  | -0.709132000 |
| 6  | 4.209402000  | 3.191416000  | -0.590942000 |
| 1  | 3.289110000  | 3.672064000  | -0.912425000 |
| 1  | 4.415868000  | 3.510826000  | 0.439312000  |
| 1  | 5.023698000  | 3.568376000  | -1.222151000 |
| 6  | 5.439015000  | 1.162866000  | -0.533642000 |
| 1  | 5.385901000  | 0.081483000  | -0.415310000 |
| 1  | 6.113459000  | 1.389229000  | -1.371338000 |
| 1  | 5.910504000  | 1.560269000  | 0.373956000  |
| 1  | 4.149998000  | -0.762156000 | -1.760614000 |
| 15 | 1.047235000  | -2.671578000 | 0.270438000  |
| 6  | 2.766486000  | -2.485000000 | -0.026330000 |
| 6  | 4.075179000  | -3.050888000 | 0.364524000  |
| 1  | 4.278129000  | -2.938992000 | 1.434913000  |
| 1  | 4.158647000  | -4.116902000 | 0.134364000  |
| 1  | 4.879848000  | -2.540575000 | -0.171377000 |
| 7  | 0.629555000  | -2.464042000 | 1.839719000  |
| 7  | 0.187455000  | -3.970003000 | -0.233230000 |
| 6  | -0.701461000 | -2.716487000 | 2.371033000  |

|    |              |              |              |
|----|--------------|--------------|--------------|
| 1  | -0.619081000 | -3.289618000 | 3.299681000  |
| 1  | -1.210318000 | -1.772227000 | 2.579737000  |
| 1  | -1.307201000 | -3.272137000 | 1.659689000  |
| 6  | 1.404182000  | -1.543644000 | 2.658810000  |
| 1  | 2.402388000  | -1.404634000 | 2.243933000  |
| 1  | 0.910941000  | -0.567112000 | 2.711333000  |
| 1  | 1.495847000  | -1.944895000 | 3.671765000  |
| 6  | -0.323858000 | -4.091606000 | -1.586068000 |
| 1  | -1.344526000 | -4.483305000 | -1.552804000 |
| 1  | -0.341624000 | -3.119114000 | -2.071487000 |
| 1  | 0.293447000  | -4.776845000 | -2.177866000 |
| 6  | 0.241668000  | -5.223598000 | 0.492867000  |
| 1  | 0.829920000  | -5.966518000 | -0.057612000 |
| 1  | 0.692791000  | -5.086912000 | 1.475578000  |
| 1  | -0.768116000 | -5.623307000 | 0.632015000  |
| 31 | 0.024352000  | 0.335210000  | -0.957921000 |

**10GaTS<sup>C-F</sup>** (T.E = -4109.721909)

|    |              |              |              |
|----|--------------|--------------|--------------|
| 7  | -0.133363000 | -1.697098000 | 0.015035000  |
| 6  | 0.309357000  | -3.002463000 | -0.333836000 |
| 6  | 1.656635000  | -3.308670000 | -0.534943000 |
| 9  | 0.789790000  | 2.138653000  | 2.090848000  |
| 6  | -0.008478000 | 2.138517000  | 0.962602000  |
| 6  | 0.368236000  | 3.037657000  | -0.056276000 |
| 6  | -1.398080000 | 2.049339000  | 1.186190000  |
| 6  | -0.541830000 | 3.605343000  | -0.914318000 |
| 6  | -2.313877000 | 2.631523000  | 0.342870000  |
| 6  | -1.904409000 | 3.420904000  | -0.721678000 |
| 9  | 1.676699000  | 3.133935000  | -0.340500000 |
| 9  | -0.120813000 | 4.348401000  | -1.928175000 |
| 9  | -2.793356000 | 4.059862000  | -1.477248000 |
| 9  | -3.612962000 | 2.428334000  | 0.541990000  |
| 9  | -1.831589000 | 1.186436000  | 2.113404000  |
| 15 | -1.684128000 | -2.283233000 | -0.120556000 |
| 6  | -0.865324000 | -3.767599000 | -0.418634000 |
| 6  | -1.107700000 | -5.173459000 | -0.814569000 |
| 1  | -1.055609000 | -5.340315000 | -1.898973000 |
| 1  | -0.371615000 | -5.841231000 | -0.356537000 |
| 1  | -2.090327000 | -5.517999000 | -0.485521000 |
| 7  | -2.586428000 | -1.925827000 | 1.203290000  |
| 7  | -2.564231000 | -1.648619000 | -1.374001000 |
| 6  | -4.020780000 | -1.739858000 | 1.237474000  |
| 1  | -4.493672000 | -2.519140000 | 1.845198000  |
| 1  | -4.263714000 | -0.766488000 | 1.679650000  |
| 1  | -4.440911000 | -1.782544000 | 0.234926000  |
| 6  | -1.974153000 | -2.057323000 | 2.512876000  |
| 1  | -0.896463000 | -2.186735000 | 2.418596000  |
| 1  | -2.157609000 | -1.153329000 | 3.099796000  |



|    |              |              |              |
|----|--------------|--------------|--------------|
| 1  | -2.386358000 | -2.918937000 | 3.049190000  |
| 6  | -2.765585000 | -0.205856000 | -1.357656000 |
| 1  | -3.642516000 | 0.058801000  | -1.954194000 |
| 1  | -2.924656000 | 0.148349000  | -0.340724000 |
| 1  | -1.892040000 | 0.320875000  | -1.767683000 |
| 6  | -2.258530000 | -2.145502000 | -2.705293000 |
| 1  | -1.300773000 | -1.754326000 | -3.076243000 |
| 1  | -2.213544000 | -3.233087000 | -2.710898000 |
| 1  | -3.047593000 | -1.825270000 | -3.389830000 |
| 6  | 2.692765000  | -2.397720000 | -0.399213000 |
| 1  | 3.674733000  | -2.839526000 | -0.602173000 |
| 1  | 1.895381000  | -4.328978000 | -0.812847000 |
| 6  | 2.647272000  | -1.050498000 | -0.042343000 |
| 15 | 4.068265000  | -0.113642000 | -0.016102000 |
| 6  | 4.134961000  | 0.971819000  | 1.417948000  |
| 1  | 4.137976000  | 0.371020000  | 2.327982000  |
| 1  | 5.028754000  | 1.597837000  | 1.383401000  |
| 1  | 3.249381000  | 1.611230000  | 1.429633000  |
| 6  | 4.229746000  | 1.009208000  | -1.422065000 |
| 1  | 4.262202000  | 0.426728000  | -2.343687000 |
| 1  | 3.353900000  | 1.660189000  | -1.449827000 |
| 1  | 5.130705000  | 1.621395000  | -1.340929000 |
| 6  | 5.616170000  | -1.047454000 | 0.000774000  |
| 1  | 6.459613000  | -0.357264000 | 0.058246000  |
| 1  | 5.637379000  | -1.716245000 | 0.861880000  |
| 1  | 5.710221000  | -1.640931000 | -0.909398000 |
| 31 | 0.906751000  | -0.101984000 | 0.387349000  |

**$^{11}\text{GaTS}^{\text{C-F}}$  (T.E = -4027.513195)**

|    |              |              |              |
|----|--------------|--------------|--------------|
| 7  | -0.017014000 | -1.305803000 | 0.054353000  |
| 6  | 0.608711000  | -2.534520000 | -0.199410000 |
| 9  | 0.844876000  | 2.867504000  | 0.748719000  |
| 6  | -0.383798000 | 1.888332000  | 0.337127000  |
| 6  | -0.905870000 | 2.210381000  | -0.935373000 |
| 6  | -1.373550000 | 1.833248000  | 1.342492000  |
| 6  | -2.213298000 | 2.575088000  | -1.155494000 |
| 6  | -2.679617000 | 2.217160000  | 1.147917000  |
| 6  | -3.124443000 | 2.603268000  | -0.108819000 |
| 9  | -0.089588000 | 2.046595000  | -2.002202000 |
| 9  | -2.621978000 | 2.878675000  | -2.383766000 |
| 9  | -4.366393000 | 3.053403000  | -0.291493000 |
| 9  | -3.543762000 | 2.170175000  | 2.157993000  |
| 9  | -1.028654000 | 1.288503000  | 2.529720000  |
| 15 | -1.485180000 | -2.082624000 | -0.157300000 |
| 6  | -0.423758000 | -3.429590000 | -0.458791000 |
| 6  | -0.584723000 | -4.857121000 | -0.839145000 |
| 1  | 0.088552000  | -5.156212000 | -1.644971000 |
| 1  | -0.430107000 | -5.553924000 | -0.007339000 |

|    |              |              |              |
|----|--------------|--------------|--------------|
| 1  | -1.600333000 | -5.027372000 | -1.203149000 |
| 7  | -2.478068000 | -2.239818000 | 1.128517000  |
| 7  | -2.365310000 | -1.323158000 | -1.301365000 |
| 6  | -3.171002000 | -1.084564000 | 1.691118000  |
| 1  | -4.195722000 | -1.358155000 | 1.955997000  |
| 1  | -2.655445000 | -0.730614000 | 2.588747000  |
| 1  | -3.200455000 | -0.261018000 | 0.978648000  |
| 6  | -2.269803000 | -3.307747000 | 2.092760000  |
| 1  | -3.233978000 | -3.584419000 | 2.526167000  |
| 1  | -1.839905000 | -4.185578000 | 1.614298000  |
| 1  | -1.607321000 | -2.988762000 | 2.904907000  |
| 6  | -1.707280000 | -0.765063000 | -2.474753000 |
| 1  | -2.053585000 | 0.257805000  | -2.641453000 |
| 1  | -0.627179000 | -0.739490000 | -2.343879000 |
| 1  | -1.937817000 | -1.365019000 | -3.360303000 |
| 6  | -3.811058000 | -1.377326000 | -1.427650000 |
| 1  | -4.087994000 | -1.866609000 | -2.366388000 |
| 1  | -4.257980000 | -1.931635000 | -0.606101000 |
| 1  | -4.220337000 | -0.361257000 | -1.433976000 |
| 6  | 2.965070000  | -1.640847000 | -0.144839000 |
| 8  | 4.097514000  | -2.010466000 | -0.319827000 |
| 6  | 3.637995000  | 0.634927000  | 0.045619000  |
| 6  | 3.513539000  | 1.732401000  | -0.790540000 |
| 6  | 4.719926000  | 0.545572000  | 0.910268000  |
| 6  | 4.464243000  | 2.737942000  | -0.765261000 |
| 1  | 2.659278000  | 1.806670000  | -1.456789000 |
| 6  | 5.672417000  | 1.545763000  | 0.923181000  |
| 1  | 4.811882000  | -0.310512000 | 1.566687000  |
| 6  | 5.548664000  | 2.644528000  | 0.086869000  |
| 1  | 4.349518000  | 3.597327000  | -1.414503000 |
| 1  | 6.516033000  | 1.470399000  | 1.599335000  |
| 1  | 6.294905000  | 3.429837000  | 0.106760000  |
| 7  | 2.590787000  | -0.344082000 | 0.051439000  |
| 7  | 1.948844000  | -2.672748000 | -0.150540000 |
| 6  | 2.482658000  | -4.024238000 | -0.294782000 |
| 1  | 1.767961000  | -4.731306000 | 0.117447000  |
| 1  | 2.681560000  | -4.267495000 | -1.340350000 |
| 1  | 3.418235000  | -4.096094000 | 0.250391000  |
| 31 | 0.856856000  | 0.349888000  | 0.300820000  |

Cartesian coordinates of the van der Waals complexes involved in the pinacolborane activation by some of the representative Al(I)/Ga(I) carbenoids and also their total energies (in hartrees) including the zero point vibrational correction that have been calculated at **M06-D3/Def2-TZVP** level of theory.

**1Alv<sup>B-H</sup>** (T.E = -1342.445710)

|    |              |              |              |
|----|--------------|--------------|--------------|
| 7  | -0.270045000 | -2.047008000 | 0.461422000  |
| 6  | 0.003896000  | -2.254866000 | 1.734579000  |
| 6  | 1.205316000  | -1.977859000 | 2.365371000  |
| 7  | 2.382702000  | -1.106414000 | 0.456666000  |
| 1  | 1.295264000  | -2.227332000 | 3.412997000  |
| 1  | -0.781720000 | -2.702131000 | 2.347627000  |
| 6  | -1.592397000 | -2.303910000 | 0.031055000  |
| 6  | -1.799920000 | -2.919991000 | -1.199399000 |
| 6  | -2.694735000 | -1.902475000 | 0.781253000  |
| 6  | -3.084584000 | -3.141972000 | -1.662543000 |
| 1  | -0.942337000 | -3.233932000 | -1.784068000 |
| 6  | -3.976385000 | -2.141389000 | 0.319535000  |
| 1  | -2.539153000 | -1.356468000 | 1.704671000  |
| 6  | -4.178313000 | -2.758682000 | -0.904555000 |
| 1  | -3.229793000 | -3.626377000 | -2.620992000 |
| 1  | -4.825558000 | -1.823023000 | 0.914048000  |
| 1  | -5.183622000 | -2.935521000 | -1.267665000 |
| 6  | 3.562876000  | -0.459008000 | 0.017437000  |
| 6  | 4.177067000  | -0.884037000 | -1.155573000 |
| 6  | 4.089576000  | 0.628636000  | 0.706424000  |
| 6  | 5.313978000  | -0.245739000 | -1.616006000 |
| 1  | 3.761493000  | -1.729586000 | -1.692416000 |
| 6  | 5.229739000  | 1.260067000  | 0.243001000  |
| 1  | 3.580115000  | 0.994496000  | 1.591701000  |
| 6  | 5.847087000  | 0.824930000  | -0.917628000 |
| 1  | 5.788724000  | -0.591067000 | -2.526933000 |
| 1  | 5.628584000  | 2.109309000  | 0.785644000  |
| 1  | 6.736559000  | 1.324880000  | -1.281895000 |
| 6  | 2.306993000  | -1.426279000 | 1.733087000  |
| 1  | 3.195900000  | -1.254469000 | 2.344759000  |
| 13 | 0.898004000  | -1.118110000 | -0.885149000 |
| 1  | 0.714976000  | 1.081544000  | 1.243487000  |
| 6  | -1.545429000 | 3.205544000  | -0.124766000 |
| 6  | -2.335359000 | 1.866660000  | -0.015238000 |
| 5  | -0.236606000 | 1.605244000  | 0.762238000  |
| 8  | -0.182308000 | 2.785649000  | 0.093899000  |
| 8  | -1.492168000 | 1.088040000  | 0.864926000  |
| 6  | -1.876392000 | 4.188926000  | 0.981886000  |
| 1  | -1.148189000 | 5.001277000  | 0.956919000  |
| 1  | -2.872731000 | 4.617146000  | 0.854255000  |

|   |              |             |              |
|---|--------------|-------------|--------------|
| 1 | -1.822563000 | 3.717206000 | 1.965358000  |
| 6 | -1.637667000 | 3.887322000 | -1.467390000 |
| 1 | -2.676172000 | 4.141354000 | -1.697250000 |
| 1 | -1.058764000 | 4.812400000 | -1.448091000 |
| 1 | -1.245220000 | 3.258919000 | -2.265779000 |
| 6 | -3.706487000 | 1.986453000 | 0.604001000  |
| 1 | -4.339536000 | 2.646301000 | 0.004422000  |
| 1 | -4.178396000 | 1.002149000 | 0.632175000  |
| 1 | -3.662930000 | 2.373391000 | 1.621610000  |
| 6 | -2.427156000 | 1.112539000 | -1.327391000 |
| 1 | -2.834432000 | 0.117318000 | -1.135214000 |
| 1 | -3.088644000 | 1.621089000 | -2.031597000 |
| 1 | -1.445884000 | 0.985555000 | -1.792087000 |

**4Alv<sup>B-H</sup>** (T.E = -1555.222802)

|    |              |              |              |
|----|--------------|--------------|--------------|
| 7  | -1.680043000 | -1.219837000 | 0.642986000  |
| 6  | -1.308771000 | -0.685153000 | 1.803377000  |
| 6  | -0.053861000 | -0.720392000 | 2.371820000  |
| 6  | 1.084902000  | -1.228502000 | 1.731722000  |
| 6  | 1.109576000  | -1.800119000 | 0.481652000  |
| 6  | -2.992664000 | -0.913698000 | 0.209623000  |
| 6  | -3.819791000 | -1.925708000 | -0.269239000 |
| 6  | -3.465677000 | 0.396169000  | 0.219560000  |
| 6  | -5.098341000 | -1.634620000 | -0.707301000 |
| 1  | -3.447272000 | -2.943978000 | -0.286045000 |
| 6  | -4.748497000 | 0.679595000  | -0.215379000 |
| 1  | -2.799224000 | 1.192961000  | 0.532749000  |
| 6  | -5.571481000 | -0.332504000 | -0.679049000 |
| 1  | -5.733037000 | -2.435222000 | -1.069816000 |
| 1  | -5.101369000 | 1.704946000  | -0.205879000 |
| 1  | -6.573714000 | -0.107569000 | -1.024437000 |
| 1  | -2.088268000 | -0.172050000 | 2.371994000  |
| 15 | 2.620250000  | -2.219068000 | -0.211833000 |
| 6  | 4.089297000  | -1.843231000 | 0.772079000  |
| 1  | 4.983966000  | -2.143595000 | 0.223909000  |
| 1  | 4.135868000  | -0.771063000 | 0.970735000  |
| 1  | 4.057375000  | -2.377880000 | 1.722105000  |
| 6  | 2.728882000  | -3.975463000 | -0.599268000 |
| 1  | 2.673970000  | -4.555403000 | 0.322655000  |
| 1  | 1.872526000  | -4.238782000 | -1.225467000 |
| 1  | 3.656650000  | -4.204659000 | -1.127429000 |
| 6  | 2.872881000  | -1.387757000 | -1.787722000 |
| 1  | 2.849854000  | -0.304443000 | -1.642736000 |
| 1  | 3.820303000  | -1.689056000 | -2.239331000 |
| 1  | 2.048155000  | -1.659560000 | -2.452172000 |
| 1  | 2.009790000  | -1.107806000 | 2.309034000  |
| 1  | 0.052120000  | -0.288379000 | 3.359545000  |
| 13 | -0.567728000 | -2.249233000 | -0.644588000 |

|   |              |             |              |
|---|--------------|-------------|--------------|
| 1 | -0.001504000 | 0.303253000 | -1.954595000 |
| 6 | 1.719986000  | 2.702781000 | -0.273243000 |
| 6 | 0.233013000  | 2.995805000 | 0.095954000  |
| 5 | 0.352189000  | 1.209149000 | -1.276174000 |
| 8 | 1.592513000  | 1.773000000 | -1.370134000 |
| 8 | -0.441219000 | 1.805191000 | -0.350261000 |
| 6 | 2.478964000  | 1.978583000 | 0.821195000  |
| 1 | 3.434898000  | 1.640244000 | 0.411930000  |
| 1 | 2.685613000  | 2.632458000 | 1.670788000  |
| 1 | 1.925534000  | 1.106144000 | 1.175387000  |
| 6 | 2.507005000  | 3.904270000 | -0.736466000 |
| 1 | 2.550304000  | 4.659541000 | 0.053081000  |
| 1 | 3.529631000  | 3.603617000 | -0.972177000 |
| 1 | 2.074028000  | 4.355783000 | -1.628158000 |
| 6 | -0.034293000 | 3.177025000 | 1.570176000  |
| 1 | 0.527471000  | 4.028041000 | 1.965159000  |
| 1 | -1.097703000 | 3.373680000 | 1.723887000  |
| 1 | 0.225018000  | 2.282376000 | 2.135810000  |
| 6 | -0.365736000 | 4.147792000 | -0.688114000 |
| 1 | -1.445045000 | 4.153628000 | -0.525535000 |
| 1 | 0.036046000  | 5.109645000 | -0.363033000 |
| 1 | -0.188612000 | 4.037530000 | -1.759959000 |

**6Alv<sup>B-H</sup>** (T.E = -1685.805279)

|    |              |              |              |
|----|--------------|--------------|--------------|
| 6  | -1.461328000 | 1.288507000  | 1.302115000  |
| 6  | -1.445426000 | 1.368878000  | -0.101373000 |
| 6  | 1.031784000  | 1.213823000  | 1.453302000  |
| 1  | 1.835712000  | 1.085330000  | 2.182726000  |
| 13 | 0.081099000  | 1.467046000  | -1.390915000 |
| 7  | 1.352722000  | 1.431798000  | 0.219089000  |
| 15 | -3.057734000 | 1.498518000  | -0.672336000 |
| 6  | -4.173920000 | 0.146969000  | -0.224347000 |
| 1  | -4.191784000 | 0.052926000  | 0.860613000  |
| 1  | -5.180113000 | 0.346613000  | -0.598598000 |
| 1  | -3.805895000 | -0.780970000 | -0.664532000 |
| 6  | -3.930902000 | 2.999664000  | -0.172067000 |
| 1  | -3.377967000 | 3.865252000  | -0.539593000 |
| 1  | -4.943630000 | 3.014312000  | -0.580377000 |
| 1  | -3.968848000 | 3.032724000  | 0.916230000  |
| 6  | -3.114552000 | 1.524680000  | -2.472456000 |
| 1  | -2.681879000 | 0.607611000  | -2.876181000 |
| 1  | -4.154060000 | 1.609725000  | -2.796146000 |
| 1  | -2.539880000 | 2.366158000  | -2.861569000 |
| 8  | -2.436875000 | 1.299907000  | 2.059091000  |
| 7  | -0.186010000 | 1.147208000  | 1.992058000  |
| 6  | -0.287184000 | 0.965850000  | 3.431883000  |
| 1  | -0.743080000 | 1.837973000  | 3.899873000  |
| 1  | -0.917159000 | 0.106268000  | 3.658674000  |

|   |              |              |              |
|---|--------------|--------------|--------------|
| 1 | 0.708135000  | 0.807295000  | 3.843956000  |
| 6 | 2.744063000  | 1.433570000  | -0.068903000 |
| 6 | 3.255873000  | 2.430048000  | -0.890542000 |
| 6 | 3.592138000  | 0.445846000  | 0.418417000  |
| 6 | 4.603949000  | 2.452410000  | -1.196304000 |
| 1 | 2.583877000  | 3.185173000  | -1.282670000 |
| 6 | 4.941280000  | 0.476260000  | 0.110910000  |
| 1 | 3.178274000  | -0.369288000 | 1.002248000  |
| 6 | 5.452592000  | 1.479232000  | -0.694279000 |
| 1 | 4.993889000  | 3.237774000  | -1.833195000 |
| 1 | 5.592959000  | -0.302471000 | 0.490137000  |
| 1 | 6.507739000  | 1.496400000  | -0.939981000 |
| 6 | -0.392451000 | -3.246268000 | -0.774204000 |
| 6 | 0.118583000  | -2.783729000 | 0.621066000  |
| 5 | 1.430431000  | -1.945708000 | -1.016021000 |
| 8 | 0.717730000  | -2.925459000 | -1.632951000 |
| 8 | 1.038819000  | -1.726581000 | 0.276440000  |
| 6 | -1.577005000 | -2.438808000 | -1.269954000 |
| 1 | -1.726646000 | -2.652497000 | -2.329957000 |
| 1 | -2.489195000 | -2.705425000 | -0.730130000 |
| 1 | -1.401482000 | -1.364476000 | -1.157056000 |
| 6 | -0.691688000 | -4.721409000 | -0.883268000 |
| 1 | -1.471525000 | -5.006842000 | -0.171723000 |
| 1 | -1.051480000 | -4.947447000 | -1.888560000 |
| 1 | 0.192163000  | -5.330379000 | -0.696523000 |
| 6 | -0.948510000 | -2.237715000 | 1.537699000  |
| 1 | -1.709999000 | -2.997347000 | 1.734082000  |
| 1 | -0.501080000 | -1.958390000 | 2.494508000  |
| 1 | -1.432331000 | -1.354267000 | 1.119566000  |
| 6 | 0.930119000  | -3.843362000 | 1.342000000  |
| 1 | 1.422692000  | -3.382238000 | 2.200054000  |
| 1 | 0.297767000  | -4.655198000 | 1.707125000  |
| 1 | 1.701932000  | -4.265430000 | 0.695048000  |
| 1 | 2.323608000  | -1.362364000 | -1.527850000 |

**8Alv<sup>B-H</sup>** (T.E = -1919.853489)

|    |              |              |              |
|----|--------------|--------------|--------------|
| 7  | -1.318717000 | 0.378955000  | 0.047979000  |
| 6  | -1.316948000 | 1.096316000  | 1.280364000  |
| 6  | -0.139891000 | 1.034307000  | 2.155665000  |
| 15 | -2.908144000 | 0.854640000  | -0.071135000 |
| 6  | -2.534089000 | 1.711089000  | 1.410985000  |
| 6  | -3.177643000 | 2.487622000  | 2.493235000  |
| 1  | -4.039897000 | 1.970666000  | 2.926387000  |
| 1  | -2.465712000 | 2.661790000  | 3.303769000  |
| 1  | -3.529651000 | 3.467454000  | 2.155946000  |
| 7  | -3.445363000 | 1.747118000  | -1.335839000 |
| 7  | -3.895204000 | -0.466208000 | -0.057864000 |
| 6  | -3.593895000 | 1.149621000  | -2.656713000 |

|    |              |              |              |
|----|--------------|--------------|--------------|
| 1  | -2.692804000 | 1.324961000  | -3.255998000 |
| 1  | -3.746061000 | 0.073808000  | -2.578029000 |
| 1  | -4.458891000 | 1.593280000  | -3.159245000 |
| 6  | -3.156545000 | 3.171662000  | -1.386454000 |
| 1  | -3.973665000 | 3.681535000  | -1.904786000 |
| 1  | -3.068363000 | 3.580779000  | -0.380700000 |
| 1  | -2.218211000 | 3.360918000  | -1.922656000 |
| 6  | -5.333401000 | -0.320509000 | -0.180187000 |
| 1  | -5.741762000 | -1.182932000 | -0.714996000 |
| 1  | -5.815550000 | -0.273959000 | 0.804704000  |
| 1  | -5.588614000 | 0.581460000  | -0.733530000 |
| 6  | -3.507900000 | -1.626781000 | 0.727343000  |
| 1  | -2.424607000 | -1.699538000 | 0.796137000  |
| 1  | -3.932268000 | -1.577197000 | 1.738243000  |
| 1  | -3.874462000 | -2.534490000 | 0.240817000  |
| 13 | 0.008545000  | 1.021669000  | -1.321696000 |
| 6  | 2.563893000  | 1.746246000  | -0.559066000 |
| 6  | 3.208147000  | 2.874982000  | -0.043910000 |
| 6  | 3.112706000  | 1.154337000  | -1.700701000 |
| 6  | 4.366619000  | 3.361961000  | -0.617231000 |
| 1  | 2.780749000  | 3.361536000  | 0.827298000  |
| 6  | 4.267158000  | 1.652863000  | -2.280878000 |
| 1  | 2.629103000  | 0.275915000  | -2.117712000 |
| 6  | 4.908703000  | 2.753011000  | -1.739871000 |
| 1  | 4.848240000  | 4.234181000  | -0.188365000 |
| 1  | 4.671264000  | 1.167816000  | -3.162710000 |
| 1  | 5.815798000  | 3.138247000  | -2.190166000 |
| 7  | 1.381846000  | 1.256109000  | 0.015995000  |
| 5  | 1.292986000  | 0.998708000  | 1.417622000  |
| 7  | 2.396772000  | 0.655974000  | 2.265683000  |
| 6  | 3.718962000  | 0.271330000  | 1.829791000  |
| 1  | 3.798290000  | 0.228159000  | 0.747139000  |
| 1  | 4.483461000  | 0.971167000  | 2.192335000  |
| 1  | 3.969218000  | -0.722896000 | 2.227021000  |
| 6  | 2.292065000  | 0.519622000  | 3.697373000  |
| 1  | 1.381454000  | 0.967139000  | 4.089570000  |
| 1  | 2.313334000  | -0.536147000 | 4.008240000  |
| 1  | 3.137433000  | 1.014450000  | 4.191355000  |
| 1  | -0.184217000 | 1.855041000  | 2.880580000  |
| 1  | -0.245310000 | 0.114047000  | 2.749173000  |
| 6  | 0.486939000  | -3.492832000 | 0.353088000  |
| 6  | 1.392365000  | -3.080538000 | -0.844280000 |
| 5  | -0.757032000 | -2.554120000 | -1.276010000 |
| 8  | 0.518264000  | -2.227406000 | -1.614509000 |
| 8  | -0.837657000 | -3.410553000 | -0.218049000 |
| 6  | 0.526173000  | -2.497184000 | 1.495937000  |
| 1  | -0.264634000 | -2.746097000 | 2.208047000  |
| 1  | 1.482900000  | -2.514789000 | 2.023521000  |
| 1  | 0.349522000  | -1.483875000 | 1.131870000  |

|   |              |              |              |
|---|--------------|--------------|--------------|
| 6 | 0.716605000  | -4.890722000 | 0.870940000  |
| 1 | 1.743222000  | -4.997675000 | 1.231881000  |
| 1 | 0.042446000  | -5.087417000 | 1.706616000  |
| 1 | 0.535625000  | -5.644174000 | 0.105178000  |
| 6 | 2.624394000  | -2.300282000 | -0.461347000 |
| 1 | 3.247687000  | -2.875338000 | 0.229584000  |
| 1 | 3.218918000  | -2.083372000 | -1.351090000 |
| 1 | 2.361882000  | -1.350482000 | 0.004527000  |
| 6 | 1.763679000  | -4.242771000 | -1.744474000 |
| 1 | 2.208608000  | -3.845573000 | -2.658124000 |
| 1 | 2.491698000  | -4.902126000 | -1.267245000 |
| 1 | 0.887417000  | -4.831970000 | -2.023447000 |
| 1 | -1.711047000 | -2.158596000 | -1.858974000 |

**10Alv<sup>B-H</sup>** (T.E = -2011.352129)

|    |              |              |              |
|----|--------------|--------------|--------------|
| 7  | 1.529648000  | 0.672356000  | 0.005961000  |
| 6  | 1.326445000  | 0.276608000  | -1.351433000 |
| 6  | 0.234512000  | 0.711539000  | -2.091448000 |
| 6  | -0.794652000 | 1.483777000  | -1.547615000 |
| 1  | 0.164527000  | 0.388726000  | -3.124856000 |
| 1  | -1.602195000 | 1.675941000  | -2.265897000 |
| 15 | 2.940611000  | -0.196784000 | -0.057270000 |
| 6  | 2.405844000  | -0.578680000 | -1.641980000 |
| 6  | 2.785342000  | -1.299573000 | -2.877326000 |
| 1  | 3.551555000  | -2.052896000 | -2.681589000 |
| 1  | 1.925701000  | -1.828614000 | -3.305248000 |
| 1  | 3.177041000  | -0.642742000 | -3.666188000 |
| 6  | -0.901238000 | 1.981761000  | -0.258025000 |
| 15 | -2.304229000 | 2.849193000  | 0.165509000  |
| 6  | -2.023049000 | 4.630624000  | 0.316825000  |
| 1  | -2.920258000 | 5.154314000  | 0.654405000  |
| 1  | -1.217006000 | 4.783584000  | 1.038277000  |
| 1  | -1.702328000 | 5.028538000  | -0.646751000 |
| 6  | -2.947216000 | 2.380064000  | 1.780136000  |
| 1  | -3.751839000 | 3.053438000  | 2.082852000  |
| 1  | -3.316690000 | 1.355157000  | 1.725321000  |
| 1  | -2.134014000 | 2.425374000  | 2.509483000  |
| 6  | -3.720490000 | 2.685596000  | -0.948446000 |
| 1  | -3.471808000 | 3.033509000  | -1.951395000 |
| 1  | -4.006362000 | 1.632679000  | -0.994275000 |
| 1  | -4.559109000 | 3.271204000  | -0.567475000 |
| 7  | 4.357088000  | 0.660661000  | 0.058300000  |
| 7  | 3.063251000  | -1.246291000 | 1.213911000  |
| 6  | 4.664614000  | 1.342621000  | 1.307756000  |
| 1  | 4.210408000  | 2.341535000  | 1.332621000  |
| 1  | 4.279443000  | 0.784986000  | 2.160020000  |
| 1  | 5.748891000  | 1.446240000  | 1.413649000  |
| 6  | 4.750715000  | 1.439816000  | -1.102394000 |



|    |              |              |              |
|----|--------------|--------------|--------------|
| 1  | 5.809993000  | 1.696430000  | -1.016681000 |
| 1  | 4.601248000  | 0.868412000  | -2.017059000 |
| 1  | 4.175207000  | 2.372942000  | -1.177860000 |
| 6  | 4.286202000  | -1.940257000 | 1.553998000  |
| 1  | 4.419253000  | -1.949587000 | 2.641466000  |
| 1  | 4.258420000  | -2.982039000 | 1.210807000  |
| 1  | 5.148361000  | -1.451000000 | 1.104518000  |
| 6  | 1.871219000  | -1.899591000 | 1.720350000  |
| 1  | 0.975784000  | -1.370250000 | 1.400854000  |
| 1  | 1.806387000  | -2.937066000 | 1.369518000  |
| 1  | 1.889095000  | -1.906544000 | 2.814436000  |
| 13 | 0.566804000  | 1.817881000  | 1.184766000  |
| 1  | -1.862618000 | -0.585981000 | 2.631789000  |
| 6  | -1.978255000 | -2.780383000 | 0.047858000  |
| 6  | -3.208188000 | -1.858215000 | -0.214730000 |
| 5  | -2.126254000 | -1.210190000 | 1.659429000  |
| 8  | -2.979988000 | -0.761218000 | 0.695937000  |
| 8  | -1.624293000 | -2.447651000 | 1.408244000  |
| 6  | -3.297789000 | -1.318225000 | -1.621362000 |
| 1  | -3.384694000 | -2.137168000 | -2.340638000 |
| 1  | -4.190245000 | -0.694943000 | -1.718552000 |
| 1  | -2.425442000 | -0.716035000 | -1.879148000 |
| 6  | -4.528887000 | -2.483112000 | 0.190997000  |
| 1  | -5.303286000 | -1.714248000 | 0.162462000  |
| 1  | -4.819410000 | -3.286849000 | -0.488555000 |
| 1  | -4.486940000 | -2.882123000 | 1.206620000  |
| 6  | -2.267722000 | -4.259009000 | -0.035555000 |
| 1  | -2.609127000 | -4.524136000 | -1.040037000 |
| 1  | -1.353520000 | -4.819157000 | 0.168221000  |
| 1  | -3.023423000 | -4.571006000 | 0.684666000  |
| 6  | -0.776791000 | -2.433635000 | -0.806954000 |
| 1  | 0.086853000  | -2.999363000 | -0.452404000 |
| 1  | -0.937344000 | -2.684520000 | -1.858104000 |
| 1  | -0.532776000 | -1.370868000 | -0.746520000 |

**11Alv<sup>B-H</sup>** (T.E = -1929.156912)

|    |              |             |              |
|----|--------------|-------------|--------------|
| 7  | -0.764098000 | 1.097332000 | -0.074531000 |
| 6  | -1.808913000 | 2.019561000 | -0.235997000 |
| 6  | -3.585020000 | 0.260623000 | -0.325427000 |
| 15 | 0.248750000  | 2.410493000 | 0.068483000  |
| 6  | -1.216200000 | 3.287241000 | -0.220752000 |
| 6  | -1.632798000 | 4.713760000 | -0.274381000 |
| 1  | -2.175080000 | 5.047437000 | 0.617979000  |
| 1  | -0.746919000 | 5.348246000 | -0.354739000 |
| 1  | -2.257992000 | 4.946540000 | -1.139041000 |
| 7  | 0.964377000  | 2.631844000 | 1.535833000  |
| 7  | 1.498975000  | 2.340190000 | -0.984541000 |
| 6  | 1.914268000  | 1.620844000 | 1.986312000  |

|    |              |              |              |
|----|--------------|--------------|--------------|
| 1  | 1.411639000  | 0.869739000  | 2.609503000  |
| 1  | 2.354247000  | 1.097325000  | 1.137375000  |
| 1  | 2.713161000  | 2.090636000  | 2.569357000  |
| 6  | 0.157709000  | 3.172304000  | 2.616585000  |
| 1  | 0.822449000  | 3.531950000  | 3.405700000  |
| 1  | -0.448771000 | 4.006738000  | 2.268199000  |
| 1  | -0.505545000 | 2.409784000  | 3.047036000  |
| 6  | 2.793513000  | 2.961811000  | -0.808344000 |
| 1  | 3.579406000  | 2.204425000  | -0.910040000 |
| 1  | 2.952488000  | 3.734047000  | -1.568759000 |
| 1  | 2.873948000  | 3.425105000  | 0.172658000  |
| 6  | 1.245493000  | 1.882348000  | -2.338416000 |
| 1  | 0.303600000  | 1.336870000  | -2.387359000 |
| 1  | 1.207428000  | 2.726259000  | -3.036049000 |
| 1  | 2.045465000  | 1.204197000  | -2.646399000 |
| 7  | -3.084063000 | 1.628717000  | -0.361153000 |
| 6  | -4.068069000 | 2.670164000  | -0.615533000 |
| 1  | -4.027894000 | 3.428910000  | 0.166558000  |
| 1  | -3.889661000 | 3.143640000  | -1.583113000 |
| 1  | -5.048973000 | 2.206915000  | -0.626957000 |
| 8  | -4.750254000 | 0.110594000  | -0.617231000 |
| 7  | -2.721056000 | -0.696933000 | 0.068409000  |
| 6  | -3.292998000 | -2.003680000 | 0.111559000  |
| 6  | -3.704018000 | -2.652116000 | -1.046496000 |
| 6  | -3.368787000 | -2.674335000 | 1.323765000  |
| 6  | -4.189877000 | -3.943914000 | -0.988047000 |
| 1  | -3.642302000 | -2.127087000 | -1.992831000 |
| 6  | -3.851076000 | -3.971981000 | 1.380111000  |
| 1  | -3.045296000 | -2.164856000 | 2.225237000  |
| 6  | -4.265177000 | -4.610512000 | 0.225595000  |
| 1  | -4.509450000 | -4.437773000 | -1.898755000 |
| 1  | -3.903532000 | -4.483324000 | 2.334578000  |
| 1  | -4.643312000 | -5.625297000 | 0.268008000  |
| 13 | -0.816373000 | -0.737059000 | 0.487191000  |
| 1  | 1.385822000  | -1.020121000 | -1.965609000 |
| 6  | 4.200633000  | -1.128441000 | -0.088160000 |
| 6  | 3.670845000  | -2.588898000 | -0.015472000 |
| 5  | 2.273008000  | -1.327653000 | -1.244766000 |
| 8  | 2.690357000  | -2.606815000 | -1.071984000 |
| 8  | 3.051970000  | -0.408659000 | -0.586946000 |
| 6  | 4.708872000  | -3.649469000 | -0.288499000 |
| 1  | 5.515521000  | -3.592427000 | 0.447801000  |
| 1  | 4.250143000  | -4.636444000 | -0.210930000 |
| 1  | 5.137338000  | -3.553802000 | -1.285815000 |
| 6  | 2.933437000  | -2.895287000 | 1.273212000  |
| 1  | 2.419312000  | -3.851125000 | 1.159523000  |
| 1  | 3.619718000  | -2.971816000 | 2.119495000  |
| 1  | 2.170113000  | -2.142889000 | 1.491296000  |
| 6  | 4.626998000  | -0.543559000 | 1.235909000  |

|   |             |              |              |
|---|-------------|--------------|--------------|
| 1 | 5.472038000 | -1.105134000 | 1.642888000  |
| 1 | 4.947173000 | 0.492492000  | 1.096078000  |
| 1 | 3.820709000 | -0.558617000 | 1.968650000  |
| 6 | 5.302399000 | -0.937311000 | -1.113640000 |
| 1 | 5.470518000 | 0.133083000  | -1.252836000 |
| 1 | 6.240944000 | -1.390371000 | -0.788341000 |
| 1 | 5.025170000 | -1.364546000 | -2.079409000 |

**13Alv<sup>B-H</sup>** (T.E = -2254.708666)

|    |              |              |              |
|----|--------------|--------------|--------------|
| 7  | 1.699821000  | -0.543208000 | -0.123095000 |
| 6  | 1.766864000  | -1.351175000 | 1.066622000  |
| 6  | 0.657657000  | -1.959456000 | 1.633295000  |
| 6  | -0.601254000 | -1.902945000 | 1.052282000  |
| 1  | 0.786922000  | -2.543500000 | 2.538288000  |
| 13 | 0.281512000  | -0.255539000 | -1.364160000 |
| 15 | 3.340013000  | -0.419526000 | -0.007375000 |
| 6  | 3.130514000  | -1.363855000 | 1.405107000  |
| 6  | 3.886408000  | -2.082207000 | 2.456379000  |
| 1  | 4.951954000  | -1.846349000 | 2.403619000  |
| 1  | 3.553681000  | -1.814785000 | 3.465098000  |
| 1  | 3.795388000  | -3.173065000 | 2.370665000  |
| 7  | -0.879111000 | -1.209415000 | -0.176885000 |
| 6  | -1.829910000 | -2.474349000 | 1.419681000  |
| 15 | -2.424086000 | -1.780605000 | -0.026614000 |
| 6  | -2.238997000 | -3.306737000 | 2.574361000  |
| 1  | -1.632957000 | -4.214573000 | 2.670678000  |
| 1  | -2.162872000 | -2.770658000 | 3.528540000  |
| 1  | -3.278340000 | -3.630061000 | 2.473846000  |
| 7  | -3.719511000 | -0.775357000 | 0.112089000  |
| 7  | -2.820053000 | -2.656434000 | -1.392076000 |
| 6  | -4.297320000 | -0.066282000 | -1.011553000 |
| 1  | -4.236374000 | 1.011542000  | -0.833249000 |
| 1  | -3.762266000 | -0.297880000 | -1.932384000 |
| 1  | -5.353256000 | -0.334330000 | -1.142103000 |
| 6  | -4.215940000 | -0.332082000 | 1.400045000  |
| 1  | -4.025311000 | 0.737029000  | 1.541947000  |
| 1  | -5.296905000 | -0.503541000 | 1.459343000  |
| 1  | -3.727443000 | -0.881395000 | 2.203641000  |
| 6  | -1.766820000 | -3.433546000 | -2.024229000 |
| 1  | -2.124908000 | -3.784563000 | -2.994984000 |
| 1  | -0.881714000 | -2.820261000 | -2.187049000 |
| 1  | -1.486809000 | -4.309585000 | -1.422325000 |
| 6  | -4.080226000 | -3.378062000 | -1.370009000 |
| 1  | -3.984227000 | -4.343064000 | -0.851106000 |
| 1  | -4.853487000 | -2.796874000 | -0.868878000 |
| 1  | -4.408282000 | -3.576708000 | -2.393964000 |
| 7  | 3.853891000  | 1.163197000  | 0.015609000  |
| 7  | 4.241117000  | -1.063879000 | -1.243289000 |

|   |              |              |              |
|---|--------------|--------------|--------------|
| 6 | 5.279375000  | 1.429028000  | 0.093875000  |
| 1 | 5.473397000  | 2.454431000  | -0.232945000 |
| 1 | 5.654062000  | 1.327083000  | 1.122906000  |
| 1 | 5.839977000  | 0.749071000  | -0.545200000 |
| 6 | 3.086900000  | 2.053632000  | 0.873344000  |
| 1 | 2.020411000  | 1.843049000  | 0.796939000  |
| 1 | 3.391322000  | 1.959355000  | 1.924727000  |
| 1 | 3.263697000  | 3.086509000  | 0.558497000  |
| 6 | 4.243229000  | -2.512982000 | -1.346644000 |
| 1 | 5.088796000  | -2.826030000 | -1.964584000 |
| 1 | 4.342540000  | -2.966575000 | -0.361214000 |
| 1 | 3.319674000  | -2.887191000 | -1.810632000 |
| 6 | 4.213409000  | -0.419176000 | -2.548690000 |
| 1 | 4.140167000  | 0.662024000  | -2.443168000 |
| 1 | 5.129837000  | -0.660396000 | -3.095556000 |
| 1 | 3.351719000  | -0.758719000 | -3.138998000 |
| 1 | -1.523559000 | 0.843118000  | 1.816299000  |
| 6 | -0.521877000 | 3.611974000  | 0.128192000  |
| 6 | -2.031341000 | 3.500596000  | -0.250728000 |
| 8 | -0.248244000 | 2.325150000  | 0.719955000  |
| 8 | -2.515422000 | 2.500973000  | 0.674871000  |
| 5 | -1.436415000 | 1.795248000  | 1.118539000  |
| 6 | 0.404239000  | 3.828213000  | -1.044657000 |
| 1 | 0.134811000  | 4.743128000  | -1.579759000 |
| 1 | 1.430260000  | 3.938993000  | -0.688654000 |
| 1 | 0.379294000  | 2.985978000  | -1.738645000 |
| 6 | -0.242586000 | 4.639239000  | 1.209051000  |
| 1 | 0.786676000  | 4.511504000  | 1.550664000  |
| 1 | -0.355726000 | 5.658965000  | 0.835308000  |
| 1 | -0.900877000 | 4.505773000  | 2.070190000  |
| 6 | -2.826823000 | 4.768310000  | -0.050302000 |
| 1 | -2.433607000 | 5.569382000  | -0.682144000 |
| 1 | -3.866093000 | 4.594203000  | -0.335115000 |
| 1 | -2.812312000 | 5.101543000  | 0.986825000  |
| 6 | -2.260532000 | 2.967048000  | -1.650482000 |
| 1 | -3.327676000 | 2.780921000  | -1.786676000 |
| 1 | -1.948402000 | 3.689857000  | -2.406719000 |
| 1 | -1.721233000 | 2.029963000  | -1.825445000 |

**1Gav<sup>B-H</sup> (T.E = -3024.843240)**

|   |              |              |              |
|---|--------------|--------------|--------------|
| 7 | -0.374923000 | -1.971605000 | 0.601117000  |
| 6 | -0.093033000 | -2.092119000 | 1.879361000  |
| 6 | 1.106738000  | -1.775485000 | 2.499759000  |
| 7 | 2.358315000  | -0.982783000 | 0.594383000  |
| 1 | 1.180261000  | -1.972562000 | 3.560384000  |
| 1 | -0.874557000 | -2.502388000 | 2.525942000  |
| 6 | -1.687398000 | -2.236830000 | 0.178079000  |
| 6 | -1.889036000 | -2.889397000 | -1.036586000 |

|    |              |              |              |
|----|--------------|--------------|--------------|
| 6  | -2.799752000 | -1.809123000 | 0.902323000  |
| 6  | -3.168843000 | -3.121344000 | -1.507003000 |
| 1  | -1.026194000 | -3.230655000 | -1.598579000 |
| 6  | -4.076807000 | -2.057358000 | 0.433331000  |
| 1  | -2.652433000 | -1.236582000 | 1.811133000  |
| 6  | -4.269840000 | -2.711262000 | -0.773326000 |
| 1  | -3.305798000 | -3.635264000 | -2.451365000 |
| 1  | -4.931253000 | -1.717961000 | 1.008849000  |
| 1  | -5.272006000 | -2.895926000 | -1.141001000 |
| 6  | 3.532139000  | -0.341976000 | 0.159323000  |
| 6  | 4.144127000  | -0.771798000 | -1.015494000 |
| 6  | 4.066988000  | 0.751305000  | 0.837409000  |
| 6  | 5.278545000  | -0.137421000 | -1.486556000 |
| 1  | 3.730577000  | -1.626355000 | -1.540421000 |
| 6  | 5.204859000  | 1.378390000  | 0.363591000  |
| 1  | 3.562926000  | 1.124783000  | 1.722496000  |
| 6  | 5.816892000  | 0.937198000  | -0.797955000 |
| 1  | 5.748805000  | -0.489598000 | -2.397387000 |
| 1  | 5.607171000  | 2.230742000  | 0.899090000  |
| 1  | 6.704869000  | 1.434285000  | -1.169601000 |
| 6  | 2.228097000  | -1.249940000 | 1.874141000  |
| 1  | 3.093148000  | -1.054473000 | 2.515473000  |
| 1  | 0.716377000  | 1.281962000  | 1.207497000  |
| 6  | -1.675737000 | 3.279866000  | -0.126336000 |
| 6  | -2.383851000 | 1.897051000  | -0.020363000 |
| 5  | -0.269892000 | 1.756129000  | 0.746596000  |
| 8  | -0.288241000 | 2.935723000  | 0.073546000  |
| 8  | -1.492839000 | 1.167140000  | 0.853588000  |
| 6  | -2.050726000 | 4.231519000  | 0.993794000  |
| 1  | -1.368679000 | 5.083062000  | 0.972121000  |
| 1  | -3.070165000 | 4.605289000  | 0.878615000  |
| 1  | -1.962999000 | 3.752967000  | 1.971445000  |
| 6  | -1.824504000 | 3.967805000  | -1.460575000 |
| 1  | -2.879311000 | 4.160361000  | -1.675220000 |
| 1  | -1.302781000 | 4.926196000  | -1.438748000 |
| 1  | -1.405542000 | 3.372840000  | -2.270992000 |
| 6  | -3.759404000 | 1.933285000  | 0.599222000  |
| 1  | -4.426856000 | 2.566570000  | 0.008393000  |
| 1  | -4.177683000 | 0.924914000  | 0.614173000  |
| 1  | -3.735667000 | 2.308460000  | 1.621851000  |
| 6  | -2.430820000 | 1.143588000  | -1.335787000 |
| 1  | -2.758294000 | 0.118872000  | -1.145848000 |
| 1  | -3.134642000 | 1.603769000  | -2.032212000 |
| 1  | -1.447685000 | 1.097650000  | -1.811139000 |
| 31 | 0.822289000  | -1.003533000 | -0.875020000 |

**4Gav<sup>B-H</sup> (T.E = -3237.620310)**

|   |              |              |             |
|---|--------------|--------------|-------------|
| 7 | -1.688162000 | -0.952157000 | 0.765328000 |
|---|--------------|--------------|-------------|

|    |              |              |              |
|----|--------------|--------------|--------------|
| 6  | -1.275773000 | -0.402340000 | 1.893737000  |
| 6  | -0.008823000 | -0.466438000 | 2.446053000  |
| 6  | 1.112409000  | -1.023787000 | 1.823178000  |
| 6  | 1.153816000  | -1.624241000 | 0.585553000  |
| 6  | -2.986828000 | -0.629351000 | 0.330116000  |
| 6  | -3.824747000 | -1.633574000 | -0.150555000 |
| 6  | -3.449073000 | 0.685795000  | 0.331341000  |
| 6  | -5.098253000 | -1.331799000 | -0.594481000 |
| 1  | -3.464306000 | -2.656360000 | -0.157703000 |
| 6  | -4.726858000 | 0.980211000  | -0.110256000 |
| 1  | -2.776421000 | 1.477109000  | 0.644066000  |
| 6  | -5.559113000 | -0.024807000 | -0.573199000 |
| 1  | -5.739746000 | -2.127431000 | -0.956361000 |
| 1  | -5.069151000 | 2.009285000  | -0.106446000 |
| 1  | -6.557666000 | 0.208926000  | -0.923259000 |
| 1  | -2.022356000 | 0.156572000  | 2.467195000  |
| 15 | 2.655907000  | -2.096377000 | -0.071363000 |
| 6  | 4.135287000  | -1.738432000 | 0.908120000  |
| 1  | 5.024953000  | -2.074623000 | 0.372615000  |
| 1  | 4.208062000  | -0.663385000 | 1.082218000  |
| 1  | 4.084306000  | -2.248393000 | 1.870847000  |
| 6  | 2.727939000  | -3.865792000 | -0.417832000 |
| 1  | 2.642577000  | -4.422321000 | 0.516067000  |
| 1  | 1.879277000  | -4.126961000 | -1.054119000 |
| 1  | 3.658243000  | -4.132166000 | -0.923774000 |
| 6  | 2.949194000  | -1.318554000 | -1.669179000 |
| 1  | 2.960105000  | -0.232458000 | -1.550601000 |
| 1  | 3.889645000  | -1.660264000 | -2.106373000 |
| 1  | 2.123193000  | -1.576524000 | -2.336633000 |
| 1  | 2.033906000  | -0.917169000 | 2.409997000  |
| 1  | 0.118399000  | -0.015240000 | 3.423020000  |
| 1  | -0.000358000 | 0.440831000  | -1.932785000 |
| 6  | 1.812874000  | 2.825473000  | -0.328837000 |
| 6  | 0.340342000  | 3.165318000  | 0.059602000  |
| 5  | 0.389357000  | 1.348446000  | -1.276082000 |
| 8  | 1.642736000  | 1.875604000  | -1.402452000 |
| 8  | -0.374040000 | 1.986695000  | -0.353736000 |
| 6  | 2.572643000  | 2.106739000  | 0.768661000  |
| 1  | 3.515892000  | 1.740977000  | 0.353389000  |
| 1  | 2.804941000  | 2.772786000  | 1.601992000  |
| 1  | 2.006643000  | 1.252852000  | 1.147393000  |
| 6  | 2.621612000  | 3.995944000  | -0.832487000 |
| 1  | 2.699215000  | 4.766316000  | -0.060301000 |
| 1  | 3.631498000  | 3.663583000  | -1.080297000 |
| 1  | 2.183803000  | 4.439811000  | -1.725692000 |
| 6  | 0.104371000  | 3.379286000  | 1.534933000  |
| 1  | 0.699642000  | 4.218382000  | 1.905746000  |
| 1  | -0.949327000 | 3.612588000  | 1.703313000  |
| 1  | 0.344719000  | 2.485601000  | 2.110843000  |

|    |              |              |              |
|----|--------------|--------------|--------------|
| 6  | -0.240869000 | 4.319375000  | -0.734601000 |
| 1  | -1.316629000 | 4.356932000  | -0.553672000 |
| 1  | 0.191982000  | 5.275661000  | -0.433796000 |
| 1  | -0.085734000 | 4.185551000  | -1.807200000 |
| 31 | -0.548324000 | -2.068854000 | -0.625027000 |

**6Gav<sup>B-H</sup>** (T.E = -3368.203594)

|    |              |              |              |
|----|--------------|--------------|--------------|
| 6  | 1.459204000  | -1.115489000 | 1.470731000  |
| 6  | 1.469780000  | -1.244064000 | 0.068908000  |
| 6  | -1.041368000 | -1.036949000 | 1.640480000  |
| 1  | -1.827552000 | -0.863926000 | 2.382222000  |
| 7  | -1.383435000 | -1.320742000 | 0.433695000  |
| 15 | 3.089471000  | -1.389029000 | -0.463953000 |
| 6  | 4.199020000  | -0.012016000 | -0.074507000 |
| 1  | 4.202726000  | 0.136856000  | 1.004474000  |
| 1  | 5.210668000  | -0.226418000 | -0.425324000 |
| 1  | 3.833899000  | 0.891297000  | -0.565373000 |
| 6  | 3.976563000  | -2.859661000 | 0.103010000  |
| 1  | 3.431618000  | -3.746591000 | -0.222956000 |
| 1  | 4.989098000  | -2.883691000 | -0.305556000 |
| 1  | 4.015369000  | -2.842068000 | 1.191473000  |
| 6  | 3.163264000  | -1.496954000 | -2.262851000 |
| 1  | 2.721976000  | -0.605713000 | -2.712768000 |
| 1  | 4.205099000  | -1.579854000 | -2.578146000 |
| 1  | 2.610187000  | -2.368032000 | -2.616818000 |
| 8  | 2.439222000  | -1.099777000 | 2.225936000  |
| 7  | 0.192277000  | -0.946597000 | 2.157330000  |
| 6  | 0.307188000  | -0.701871000 | 3.587047000  |
| 1  | 0.764806000  | -1.552738000 | 4.091452000  |
| 1  | 0.939679000  | 0.165953000  | 3.772491000  |
| 1  | -0.684414000 | -0.523386000 | 3.999973000  |
| 6  | -2.765111000 | -1.321238000 | 0.143898000  |
| 6  | -3.278946000 | -2.337758000 | -0.653805000 |
| 6  | -3.615041000 | -0.315669000 | 0.594628000  |
| 6  | -4.624664000 | -2.364577000 | -0.967425000 |
| 1  | -2.607704000 | -3.108323000 | -1.016328000 |
| 6  | -4.961896000 | -0.349787000 | 0.278386000  |
| 1  | -3.202134000 | 0.516091000  | 1.155198000  |
| 6  | -5.473331000 | -1.374039000 | -0.499680000 |
| 1  | -5.013694000 | -3.166576000 | -1.584056000 |
| 1  | -5.612739000 | 0.442888000  | 0.629490000  |
| 1  | -6.526909000 | -1.394167000 | -0.751727000 |
| 6  | 0.381992000  | 3.291667000  | -0.841875000 |
| 6  | -0.116813000 | 2.914955000  | 0.584539000  |
| 5  | -1.443591000 | 1.978993000  | -0.986414000 |
| 8  | -0.731565000 | 2.912432000  | -1.672485000 |
| 8  | -1.048106000 | 1.846262000  | 0.314169000  |
| 6  | 1.567329000  | 2.461188000  | -1.295477000 |

|    |              |              |              |
|----|--------------|--------------|--------------|
| 1  | 1.706683000  | 2.607689000  | -2.368304000 |
| 1  | 2.482426000  | 2.767338000  | -0.782282000 |
| 1  | 1.401022000  | 1.395833000  | -1.109280000 |
| 6  | 0.673134000  | 4.758366000  | -1.046473000 |
| 1  | 1.456146000  | 5.092285000  | -0.360042000 |
| 1  | 1.025298000  | 4.921352000  | -2.066622000 |
| 1  | -0.212354000 | 5.374185000  | -0.893167000 |
| 6  | 0.956457000  | 2.413135000  | 1.519721000  |
| 1  | 1.728753000  | 3.174221000  | 1.661235000  |
| 1  | 0.517689000  | 2.196976000  | 2.496640000  |
| 1  | 1.424299000  | 1.499311000  | 1.150526000  |
| 6  | -0.912898000 | 4.020534000  | 1.251213000  |
| 1  | -1.395552000 | 3.614555000  | 2.142052000  |
| 1  | -0.271554000 | 4.849379000  | 1.557678000  |
| 1  | -1.692052000 | 4.406983000  | 0.590877000  |
| 1  | -2.334664000 | 1.358731000  | -1.458161000 |
| 31 | -0.049409000 | -1.386728000 | -1.316079000 |

**8Gav<sup>B-H</sup>** (T.E = -3602.243197)

|    |              |              |              |
|----|--------------|--------------|--------------|
| 7  | -1.856025000 | -1.122189000 | -0.346309000 |
| 6  | -1.641342000 | -1.077455000 | 1.050944000  |
| 6  | -0.283232000 | -1.142610000 | 1.581292000  |
| 15 | -3.420732000 | -0.742561000 | 0.024279000  |
| 6  | -2.849499000 | -0.844012000 | 1.668140000  |
| 6  | -3.248022000 | -0.656059000 | 3.080511000  |
| 1  | -3.693182000 | 0.326919000  | 3.269765000  |
| 1  | -3.968957000 | -1.402517000 | 3.427169000  |
| 1  | -2.367542000 | -0.734372000 | 3.724894000  |
| 7  | -4.017490000 | 0.737884000  | -0.400574000 |
| 7  | -4.474267000 | -1.799023000 | -0.677606000 |
| 6  | -4.353549000 | 1.023655000  | -1.787630000 |
| 1  | -3.497465000 | 1.463530000  | -2.315473000 |
| 1  | -4.645101000 | 0.114910000  | -2.311544000 |
| 1  | -5.185724000 | 1.732918000  | -1.822617000 |
| 6  | -3.517085000 | 1.913351000  | 0.296445000  |
| 1  | -4.270276000 | 2.704363000  | 0.250884000  |
| 1  | -3.308672000 | 1.684359000  | 1.340339000  |
| 1  | -2.592327000 | 2.290590000  | -0.161733000 |
| 6  | -5.907077000 | -1.661928000 | -0.509392000 |
| 1  | -6.417395000 | -1.937207000 | -1.437887000 |
| 1  | -6.279043000 | -2.317303000 | 0.287768000  |
| 1  | -6.171001000 | -0.634234000 | -0.263425000 |
| 6  | -4.044628000 | -3.163707000 | -0.926793000 |
| 1  | -2.965576000 | -3.192740000 | -1.065829000 |
| 1  | -4.316923000 | -3.826616000 | -0.096273000 |
| 1  | -4.530015000 | -3.534986000 | -1.833831000 |
| 6  | 0.660681000  | 2.216517000  | -0.178242000 |
| 6  | 0.104685000  | 3.300799000  | 0.510310000  |



|    |              |              |              |
|----|--------------|--------------|--------------|
| 6  | 1.568899000  | 2.497348000  | -1.205558000 |
| 6  | 0.474804000  | 4.600140000  | 0.217663000  |
| 1  | -0.606289000 | 3.093591000  | 1.305677000  |
| 6  | 1.929999000  | 3.800837000  | -1.499864000 |
| 1  | 2.012913000  | 1.662984000  | -1.740397000 |
| 6  | 1.393164000  | 4.861403000  | -0.788383000 |
| 1  | 0.039615000  | 5.419816000  | 0.779631000  |
| 1  | 2.646042000  | 3.988535000  | -2.292904000 |
| 1  | 1.681363000  | 5.880306000  | -1.018097000 |
| 7  | 0.283211000  | 0.905093000  | 0.104514000  |
| 5  | 0.435354000  | 0.295929000  | 1.368278000  |
| 7  | 1.241143000  | 0.794821000  | 2.453119000  |
| 6  | 2.302864000  | 1.764640000  | 2.317291000  |
| 1  | 2.486946000  | 2.022778000  | 1.276832000  |
| 1  | 2.082779000  | 2.694818000  | 2.858086000  |
| 1  | 3.235681000  | 1.357711000  | 2.734747000  |
| 6  | 1.205110000  | 0.291826000  | 3.803104000  |
| 1  | 0.284958000  | -0.248276000 | 4.017717000  |
| 1  | 2.055022000  | -0.375034000 | 4.019180000  |
| 1  | 1.262757000  | 1.123366000  | 4.516040000  |
| 1  | -0.287326000 | -1.473090000 | 2.618979000  |
| 1  | 0.292845000  | -1.876789000 | 1.003638000  |
| 31 | -0.617540000 | 0.159492000  | -1.612162000 |
| 1  | 1.033977000  | -2.115936000 | -1.532948000 |
| 6  | 3.968323000  | -2.134512000 | 0.165545000  |
| 6  | 4.210504000  | -1.071534000 | -0.951457000 |
| 5  | 2.136433000  | -1.932913000 | -1.129559000 |
| 8  | 2.766172000  | -2.794260000 | -0.286347000 |
| 8  | 2.883826000  | -0.852259000 | -1.471068000 |
| 6  | 3.644715000  | -1.531107000 | 1.518408000  |
| 1  | 3.290430000  | -2.327330000 | 2.177235000  |
| 1  | 4.524436000  | -1.073524000 | 1.976947000  |
| 1  | 2.855741000  | -0.778315000 | 1.450367000  |
| 6  | 5.066167000  | -3.159968000 | 0.310973000  |
| 1  | 6.008790000  | -2.673604000 | 0.576891000  |
| 1  | 4.809235000  | -3.858186000 | 1.109553000  |
| 1  | 5.214463000  | -3.732443000 | -0.603885000 |
| 6  | 5.043117000  | -1.593325000 | -2.106867000 |
| 1  | 4.995642000  | -0.871202000 | -2.923578000 |
| 1  | 6.089594000  | -1.722783000 | -1.823178000 |
| 1  | 4.660357000  | -2.546579000 | -2.477418000 |
| 6  | 4.765638000  | 0.245082000  | -0.465845000 |
| 1  | 5.735346000  | 0.099273000  | 0.018134000  |
| 1  | 4.907494000  | 0.918016000  | -1.313799000 |
| 1  | 4.090753000  | 0.733116000  | 0.237323000  |

**10Gav<sup>B-H</sup> (T.E = -3693.743658)**

|   |             |             |              |
|---|-------------|-------------|--------------|
| 7 | 1.496128000 | 0.533483000 | -0.103855000 |
|---|-------------|-------------|--------------|

|    |              |              |              |
|----|--------------|--------------|--------------|
| 6  | 1.273134000  | 0.079556000  | -1.433461000 |
| 6  | 0.176806000  | 0.478566000  | -2.189495000 |
| 6  | -0.855788000 | 1.276614000  | -1.693598000 |
| 1  | 0.104992000  | 0.099548000  | -3.203857000 |
| 1  | -1.659341000 | 1.423432000  | -2.427762000 |
| 15 | 2.901528000  | -0.337437000 | -0.151025000 |
| 6  | 2.344154000  | -0.798406000 | -1.705308000 |
| 6  | 2.701283000  | -1.569309000 | -2.917261000 |
| 1  | 3.494272000  | -2.291664000 | -2.711293000 |
| 1  | 1.843613000  | -2.142004000 | -3.290747000 |
| 1  | 3.048924000  | -0.942049000 | -3.750031000 |
| 6  | -0.983229000 | 1.853006000  | -0.441210000 |
| 15 | -2.387170000 | 2.735915000  | -0.079347000 |
| 6  | -2.092689000 | 4.517827000  | 0.050174000  |
| 1  | -2.991969000 | 5.055731000  | 0.358727000  |
| 1  | -1.302356000 | 4.677084000  | 0.787185000  |
| 1  | -1.746300000 | 4.897142000  | -0.911947000 |
| 6  | -3.081019000 | 2.309731000  | 1.528265000  |
| 1  | -3.904104000 | 2.980548000  | 1.783288000  |
| 1  | -3.432891000 | 1.277628000  | 1.495799000  |
| 1  | -2.296717000 | 2.390921000  | 2.284710000  |
| 6  | -3.777959000 | 2.573754000  | -1.228123000 |
| 1  | -3.497352000 | 2.915219000  | -2.225000000 |
| 1  | -4.069824000 | 1.523031000  | -1.281158000 |
| 1  | -4.623932000 | 3.165907000  | -0.874447000 |
| 7  | 4.319524000  | 0.531496000  | -0.097070000 |
| 7  | 3.054189000  | -1.321941000 | 1.172007000  |
| 6  | 4.606943000  | 1.295402000  | 1.108251000  |
| 1  | 4.097443000  | 2.268326000  | 1.090571000  |
| 1  | 4.270878000  | 0.760370000  | 1.995331000  |
| 1  | 5.684569000  | 1.466843000  | 1.187713000  |
| 6  | 4.679103000  | 1.258873000  | -1.301636000 |
| 1  | 5.730278000  | 1.553042000  | -1.239839000 |
| 1  | 4.540796000  | 0.633985000  | -2.182491000 |
| 1  | 4.073334000  | 2.167970000  | -1.423516000 |
| 6  | 4.280566000  | -2.023306000 | 1.484875000  |
| 1  | 4.428718000  | -2.044392000 | 2.569962000  |
| 1  | 4.247752000  | -3.062059000 | 1.131350000  |
| 1  | 5.136386000  | -1.529317000 | 1.028226000  |
| 6  | 1.870663000  | -1.977701000 | 1.694748000  |
| 1  | 0.973356000  | -1.422164000 | 1.429260000  |
| 1  | 1.772951000  | -3.000476000 | 1.308287000  |
| 1  | 1.931098000  | -2.029055000 | 2.785866000  |
| 1  | -1.712450000 | -0.510387000 | 2.490034000  |
| 6  | -1.952277000 | -2.924879000 | 0.118325000  |
| 6  | -3.211881000 | -2.041716000 | -0.147797000 |
| 5  | -2.029779000 | -1.222126000 | 1.595898000  |
| 8  | -2.958626000 | -0.874639000 | 0.662210000  |
| 8  | -1.518841000 | -2.468251000 | 1.418564000  |

|    |              |              |              |
|----|--------------|--------------|--------------|
| 6  | -3.381952000 | -1.605951000 | -1.583299000 |
| 1  | -3.490136000 | -2.474293000 | -2.238823000 |
| 1  | -4.288612000 | -1.002967000 | -1.676424000 |
| 1  | -2.534513000 | -1.009671000 | -1.925366000 |
| 6  | -4.498704000 | -2.652507000 | 0.371477000  |
| 1  | -5.288747000 | -1.900879000 | 0.321581000  |
| 1  | -4.806272000 | -3.512606000 | -0.226725000 |
| 1  | -4.398766000 | -2.968301000 | 1.412026000  |
| 6  | -2.221699000 | -4.408166000 | 0.186967000  |
| 1  | -2.616959000 | -4.768103000 | -0.767000000 |
| 1  | -1.287047000 | -4.935904000 | 0.384872000  |
| 1  | -2.927790000 | -4.662500000 | 0.976872000  |
| 6  | -0.812253000 | -2.645202000 | -0.838271000 |
| 1  | 0.083537000  | -3.161385000 | -0.487512000 |
| 1  | -1.033495000 | -2.998181000 | -1.848257000 |
| 1  | -0.585263000 | -1.578450000 | -0.892047000 |
| 31 | 0.477971000  | 1.786719000  | 1.110102000  |

**11Gav<sup>B-H</sup>** (T.E = -3611.552092)

|    |              |              |              |
|----|--------------|--------------|--------------|
| 7  | -0.868641000 | -1.243602000 | -0.007078000 |
| 6  | -0.916148000 | -0.909495000 | 1.347700000  |
| 6  | 1.563063000  | -0.705413000 | 1.610954000  |
| 7  | 1.844416000  | -1.310806000 | 0.454741000  |
| 15 | -2.508761000 | -1.044819000 | -0.018078000 |
| 6  | -2.274862000 | -0.707660000 | 1.660993000  |
| 6  | -3.080408000 | -0.244075000 | 2.823580000  |
| 1  | -3.064814000 | -0.933401000 | 3.672823000  |
| 1  | -2.773686000 | 0.739466000  | 3.198599000  |
| 1  | -4.128743000 | -0.152689000 | 2.528920000  |
| 6  | 3.195961000  | -1.229867000 | 0.033746000  |
| 6  | 3.870534000  | -2.408481000 | -0.262685000 |
| 6  | 3.839668000  | -0.014828000 | -0.183196000 |
| 6  | 5.165467000  | -2.378519000 | -0.753264000 |
| 1  | 3.364264000  | -3.353594000 | -0.094527000 |
| 6  | 5.133139000  | 0.010819000  | -0.668541000 |
| 1  | 3.305426000  | 0.903832000  | 0.025086000  |
| 6  | 5.804511000  | -1.168496000 | -0.954778000 |
| 1  | 5.676185000  | -3.308634000 | -0.976063000 |
| 1  | 5.622912000  | 0.964707000  | -0.831507000 |
| 1  | 6.818408000  | -1.141933000 | -1.336883000 |
| 31 | 0.695382000  | -1.934252000 | -1.171770000 |
| 7  | -3.152954000 | 0.165816000  | -0.915812000 |
| 7  | -3.214298000 | -2.405884000 | -0.639195000 |
| 6  | -3.131250000 | 0.127740000  | -2.366355000 |
| 1  | -2.627242000 | -0.771999000 | -2.721228000 |
| 1  | -4.148234000 | 0.142630000  | -2.776826000 |
| 1  | -2.589823000 | 0.997568000  | -2.750330000 |
| 6  | -3.669445000 | 1.398066000  | -0.356535000 |

|   |              |              |              |
|---|--------------|--------------|--------------|
| 1 | -3.537664000 | 1.412938000  | 0.724684000  |
| 1 | -3.135171000 | 2.252996000  | -0.780738000 |
| 1 | -4.737469000 | 1.503590000  | -0.582879000 |
| 6 | -4.626827000 | -2.451950000 | -0.958644000 |
| 1 | -4.781853000 | -3.034696000 | -1.871946000 |
| 1 | -5.201944000 | -2.926160000 | -0.153803000 |
| 1 | -5.023672000 | -1.450371000 | -1.118226000 |
| 6 | -2.666618000 | -3.710705000 | -0.314250000 |
| 1 | -1.601495000 | -3.635178000 | -0.104118000 |
| 1 | -3.168940000 | -4.147947000 | 0.557153000  |
| 1 | -2.803693000 | -4.384486000 | -1.164462000 |
| 8 | 2.320602000  | -0.110266000 | 2.354049000  |
| 7 | 0.188523000  | -0.815738000 | 2.098075000  |
| 6 | 0.017688000  | -0.542906000 | 3.516315000  |
| 1 | -0.157748000 | 0.517633000  | 3.716658000  |
| 1 | -0.823602000 | -1.122955000 | 3.890494000  |
| 1 | 0.922548000  | -0.833994000 | 4.040356000  |
| 1 | -0.098339000 | 0.785809000  | -2.167324000 |
| 6 | 0.675625000  | 2.986533000  | 0.301273000  |
| 6 | -0.268589000 | 3.800819000  | -0.630021000 |
| 5 | -0.000536000 | 1.709913000  | -1.430830000 |
| 8 | 0.989740000  | 1.837307000  | -0.513708000 |
| 8 | -0.863615000 | 2.767588000  | -1.449340000 |
| 6 | 1.965225000  | 3.674365000  | 0.677882000  |
| 1 | 1.763364000  | 4.595597000  | 1.231285000  |
| 1 | 2.548665000  | 3.011894000  | 1.321304000  |
| 1 | 2.567692000  | 3.915790000  | -0.197461000 |
| 6 | -0.007078000 | 2.470834000  | 1.552749000  |
| 1 | 0.682147000  | 1.792888000  | 2.059542000  |
| 1 | -0.250540000 | 3.285924000  | 2.237528000  |
| 1 | -0.924880000 | 1.919627000  | 1.319171000  |
| 6 | -1.363108000 | 4.558605000  | 0.079711000  |
| 1 | -0.934109000 | 5.312320000  | 0.745308000  |
| 1 | -1.988497000 | 5.072000000  | -0.653641000 |
| 1 | -1.999316000 | 3.900094000  | 0.670683000  |
| 6 | 0.473677000  | 4.725763000  | -1.574634000 |
| 1 | -0.227095000 | 5.104984000  | -2.320437000 |
| 1 | 0.904629000  | 5.576697000  | -1.043466000 |
| 1 | 1.275090000  | 4.201145000  | -2.098670000 |

**13Gav<sup>B-H</sup> (T.E = -3937.098992)**

|    |              |              |              |
|----|--------------|--------------|--------------|
| 7  | -1.358031000 | -1.108971000 | 0.027997000  |
| 6  | -1.224234000 | -0.524975000 | 1.324990000  |
| 6  | 0.000152000  | -0.281337000 | 1.938201000  |
| 6  | 1.217143000  | -0.566925000 | 1.331109000  |
| 15 | 2.972412000  | -0.990446000 | 0.221993000  |
| 1  | 0.006090000  | 0.131462000  | 2.942740000  |
| 31 | -0.018182000 | -1.754748000 | -1.349136000 |

|    |              |              |              |
|----|--------------|--------------|--------------|
| 1  | 0.279661000  | 0.979419000  | -2.250089000 |
| 6  | 0.768643000  | 3.551996000  | -0.075146000 |
| 6  | -0.789053000 | 3.434311000  | -0.159988000 |
| 5  | 0.181948000  | 1.864672000  | -1.467107000 |
| 8  | 1.211136000  | 2.698067000  | -1.152417000 |
| 8  | -0.984287000 | 2.181433000  | -0.845417000 |
| 6  | 1.345769000  | 2.993231000  | 1.209415000  |
| 1  | 2.434086000  | 2.981685000  | 1.131353000  |
| 1  | 1.077644000  | 3.613346000  | 2.067318000  |
| 1  | 1.007652000  | 1.971514000  | 1.394843000  |
| 6  | 1.315489000  | 4.939837000  | -0.313031000 |
| 1  | 0.956766000  | 5.630276000  | 0.455247000  |
| 1  | 2.405757000  | 4.909934000  | -0.256708000 |
| 1  | 1.039149000  | 5.330057000  | -1.291909000 |
| 6  | -1.482399000 | 3.368907000  | 1.180699000  |
| 1  | -1.251190000 | 4.255494000  | 1.777261000  |
| 1  | -2.564212000 | 3.334769000  | 1.036944000  |
| 1  | -1.189604000 | 2.475434000  | 1.735387000  |
| 6  | -1.426247000 | 4.501125000  | -1.029898000 |
| 1  | -2.477898000 | 4.251192000  | -1.182702000 |
| 1  | -1.375638000 | 5.486302000  | -0.561714000 |
| 1  | -0.948388000 | 4.553991000  | -2.010377000 |
| 7  | 1.343749000  | -1.076686000 | 0.001208000  |
| 6  | 2.543258000  | -0.423504000 | 1.785091000  |
| 6  | 3.096935000  | 0.096419000  | 3.056293000  |
| 1  | 2.986949000  | 1.184969000  | 3.165501000  |
| 1  | 2.607441000  | -0.357418000 | 3.924785000  |
| 1  | 4.163148000  | -0.123995000 | 3.147003000  |
| 7  | 3.857569000  | 0.017565000  | -0.739911000 |
| 7  | 3.648205000  | -2.470347000 | -0.119392000 |
| 6  | 3.841625000  | -0.155417000 | -2.178809000 |
| 1  | 4.856292000  | -0.088742000 | -2.589047000 |
| 1  | 3.424951000  | -1.127647000 | -2.445489000 |
| 1  | 3.226814000  | 0.619814000  | -2.651406000 |
| 6  | 4.273526000  | 1.333536000  | -0.307105000 |
| 1  | 4.247987000  | 1.399050000  | 0.780392000  |
| 1  | 5.299462000  | 1.523913000  | -0.642010000 |
| 1  | 3.621744000  | 2.112962000  | -0.719516000 |
| 6  | 2.966711000  | -3.662923000 | 0.344802000  |
| 1  | 3.023704000  | -4.444565000 | -0.419466000 |
| 1  | 3.422287000  | -4.047473000 | 1.265747000  |
| 1  | 1.916731000  | -3.447712000 | 0.538197000  |
| 6  | 5.059181000  | -2.679211000 | -0.351191000 |
| 1  | 5.542483000  | -1.752950000 | -0.655697000 |
| 1  | 5.563987000  | -3.054476000 | 0.548674000  |
| 1  | 5.199387000  | -3.420896000 | -1.145067000 |
| 15 | -2.983308000 | -0.966937000 | 0.232246000  |
| 6  | -2.546545000 | -0.316624000 | 1.761425000  |
| 7  | -3.691609000 | -2.449214000 | -0.022632000 |

|   |              |              |              |
|---|--------------|--------------|--------------|
| 7 | -3.848245000 | -0.002155000 | -0.793303000 |
| 6 | -3.773226000 | -0.246054000 | -2.220666000 |
| 1 | -3.027702000 | 0.411671000  | -2.685769000 |
| 1 | -3.484275000 | -1.278616000 | -2.420582000 |
| 1 | -4.745181000 | -0.060715000 | -2.691327000 |
| 6 | -4.174510000 | 1.364312000  | -0.452163000 |
| 1 | -3.451608000 | 2.062510000  | -0.888369000 |
| 1 | -5.173292000 | 1.608452000  | -0.830143000 |
| 1 | -4.170745000 | 1.496467000  | 0.629447000  |
| 6 | -5.105840000 | -2.642684000 | -0.247993000 |
| 1 | -5.257316000 | -3.435123000 | -0.988996000 |
| 1 | -5.624260000 | -2.943765000 | 0.671910000  |
| 1 | -5.565715000 | -1.729600000 | -0.620837000 |
| 6 | -3.034667000 | -3.626543000 | 0.510691000  |
| 1 | -1.978071000 | -3.424742000 | 0.680789000  |
| 1 | -3.490698000 | -3.942228000 | 1.457291000  |
| 1 | -3.118365000 | -4.452286000 | -0.203071000 |
| 6 | -3.094331000 | 0.289602000  | 2.996183000  |
| 1 | -3.036693000 | 1.387971000  | 3.006992000  |
| 1 | -4.144915000 | 0.026969000  | 3.141340000  |
| 1 | -2.557638000 | -0.061909000 | 3.883734000  |

Cartesian coordinates of the transition states involved in the pinacolborane activation by some of the representative Al(I)/Ga(I) carbenoids and also their total energies (in hartrees) including the zero point vibrational correction that have been calculated at **M06-D3/Def2-TZVP** level of theory.

**1AITS<sup>B-H</sup>** (T.E = -1342.418129)

|   |              |              |              |
|---|--------------|--------------|--------------|
| 7 | 1.241326000  | -2.226238000 | 0.387795000  |
| 6 | 0.957092000  | -3.512038000 | 0.463438000  |
| 6 | -0.313299000 | -4.062009000 | 0.564988000  |
| 7 | -1.601902000 | -2.030969000 | 0.351651000  |
| 1 | -0.388313000 | -5.134494000 | 0.672505000  |
| 1 | 1.800983000  | -4.202501000 | 0.441924000  |
| 6 | 2.572809000  | -1.830376000 | 0.097757000  |
| 6 | 3.083627000  | -0.685445000 | 0.695232000  |
| 6 | 3.354815000  | -2.537694000 | -0.809968000 |
| 6 | 4.366085000  | -0.264273000 | 0.400281000  |
| 1 | 2.465881000  | -0.110153000 | 1.376691000  |
| 6 | 4.642945000  | -2.118703000 | -1.087358000 |

|    |              |              |              |
|----|--------------|--------------|--------------|
| 1  | 2.939292000  | -3.394331000 | -1.328848000 |
| 6  | 5.154258000  | -0.982192000 | -0.483215000 |
| 1  | 4.745776000  | 0.637863000  | 0.865299000  |
| 1  | 5.242415000  | -2.672990000 | -1.800065000 |
| 1  | 6.158768000  | -0.648403000 | -0.714230000 |
| 6  | -2.863654000 | -1.462816000 | 0.040319000  |
| 6  | -3.193607000 | -0.220413000 | 0.568074000  |
| 6  | -3.755190000 | -2.099103000 | -0.818326000 |
| 6  | -4.407168000 | 0.363571000  | 0.260017000  |
| 1  | -2.488045000 | 0.299978000  | 1.207982000  |
| 6  | -4.973858000 | -1.514753000 | -1.109085000 |
| 1  | -3.479132000 | -3.034733000 | -1.291298000 |
| 6  | -5.306989000 | -0.283534000 | -0.569586000 |
| 1  | -4.644016000 | 1.337531000  | 0.671691000  |
| 1  | -5.658340000 | -2.016796000 | -1.782913000 |
| 1  | -6.256930000 | 0.177915000  | -0.811321000 |
| 6  | -1.493415000 | -3.343989000 | 0.443163000  |
| 1  | -2.421901000 | -3.914879000 | 0.416734000  |
| 13 | -0.098274000 | -0.887458000 | 0.631737000  |
| 6  | 1.024768000  | 3.074592000  | -0.266036000 |
| 6  | -0.452805000 | 3.310371000  | 0.152894000  |
| 8  | 1.287764000  | 1.790646000  | 0.300500000  |
| 8  | -1.000937000 | 1.994565000  | 0.102624000  |
| 5  | 0.068343000  | 1.095877000  | 0.278214000  |
| 6  | -0.582043000 | 3.808059000  | 1.583256000  |
| 1  | -0.253826000 | 4.844983000  | 1.688784000  |
| 1  | -1.632660000 | 3.751002000  | 1.875924000  |
| 1  | -0.005489000 | 3.183367000  | 2.268805000  |
| 6  | -1.239202000 | 4.206715000  | -0.775190000 |
| 1  | -2.259273000 | 4.317261000  | -0.400314000 |
| 1  | -0.788285000 | 5.202117000  | -0.828895000 |
| 1  | -1.294642000 | 3.791146000  | -1.780934000 |
| 6  | 1.201659000  | 2.968629000  | -1.771487000 |
| 1  | 1.100118000  | 3.938648000  | -2.263724000 |
| 1  | 2.203305000  | 2.582398000  | -1.974031000 |
| 1  | 0.479860000  | 2.276263000  | -2.209875000 |
| 6  | 2.014667000  | 4.066200000  | 0.297475000  |
| 1  | 3.018721000  | 3.820469000  | -0.056366000 |
| 1  | 1.778552000  | 5.082145000  | -0.032245000 |
| 1  | 2.026503000  | 4.044794000  | 1.387048000  |
| 1  | 0.026991000  | 0.132947000  | -0.862969000 |

**4AITS<sup>B-H</sup> (T.E = -1555.214881)**

|   |              |              |              |
|---|--------------|--------------|--------------|
| 7 | -2.240457000 | -1.270981000 | -0.279079000 |
| 6 | -2.589587000 | -2.566200000 | -0.237825000 |
| 6 | -1.762421000 | -3.658346000 | -0.175488000 |
| 1 | -2.245791000 | -4.627045000 | -0.174807000 |
| 1 | -3.659438000 | -2.769945000 | -0.267257000 |

|    |              |              |              |
|----|--------------|--------------|--------------|
| 6  | -3.240363000 | -0.285583000 | -0.134125000 |
| 6  | -3.023603000 | 0.977719000  | -0.680077000 |
| 6  | -4.415489000 | -0.510010000 | 0.581877000  |
| 6  | -3.965686000 | 1.977283000  | -0.537305000 |
| 1  | -2.100618000 | 1.178881000  | -1.217423000 |
| 6  | -5.360027000 | 0.492312000  | 0.708757000  |
| 1  | -4.578970000 | -1.460765000 | 1.075258000  |
| 6  | -5.145352000 | 1.740002000  | 0.148806000  |
| 1  | -3.769602000 | 2.952160000  | -0.968267000 |
| 1  | -6.265572000 | 0.298717000  | 1.272755000  |
| 1  | -5.883376000 | 2.525203000  | 0.260984000  |
| 6  | -0.352743000 | -3.622373000 | -0.065762000 |
| 1  | 0.110634000  | -4.604061000 | 0.070406000  |
| 6  | 1.129644000  | 3.130413000  | 0.240059000  |
| 6  | 2.412341000  | 2.335804000  | -0.130706000 |
| 8  | 0.104978000  | 2.323144000  | -0.330527000 |
| 8  | 1.968586000  | 0.985944000  | -0.056445000 |
| 5  | 0.543081000  | 0.989978000  | -0.247665000 |
| 6  | 2.865335000  | 2.590644000  | -1.559736000 |
| 1  | 3.292667000  | 3.588180000  | -1.687439000 |
| 1  | 3.633859000  | 1.856913000  | -1.817155000 |
| 1  | 2.033763000  | 2.469643000  | -2.257066000 |
| 6  | 3.576129000  | 2.520661000  | 0.816708000  |
| 1  | 4.423635000  | 1.919357000  | 0.476206000  |
| 1  | 3.896582000  | 3.566122000  | 0.848584000  |
| 1  | 3.321792000  | 2.202949000  | 1.828611000  |
| 6  | 0.902602000  | 3.203845000  | 1.741681000  |
| 1  | 1.612064000  | 3.875970000  | 2.230475000  |
| 1  | -0.106847000 | 3.580303000  | 1.919308000  |
| 1  | 0.975394000  | 2.216907000  | 2.204954000  |
| 6  | 1.050245000  | 4.516511000  | -0.355928000 |
| 1  | 0.129322000  | 5.002840000  | -0.027368000 |
| 1  | 1.893815000  | 5.131619000  | -0.028455000 |
| 1  | 1.041585000  | 4.482391000  | -1.445251000 |
| 1  | 0.001845000  | 0.321730000  | 0.962863000  |
| 6  | 0.422904000  | -2.497724000 | -0.114846000 |
| 15 | 2.128946000  | -2.578214000 | 0.115883000  |
| 6  | 2.774770000  | -4.254562000 | 0.280029000  |
| 1  | 3.857160000  | -4.211910000 | 0.410462000  |
| 1  | 2.333254000  | -4.747303000 | 1.146953000  |
| 1  | 2.546437000  | -4.835719000 | -0.614112000 |
| 6  | 3.021435000  | -1.810035000 | -1.239826000 |
| 1  | 2.751953000  | -2.291189000 | -2.180358000 |
| 1  | 2.743804000  | -0.751163000 | -1.268047000 |
| 1  | 4.097413000  | -1.895008000 | -1.073788000 |
| 6  | 2.647880000  | -1.687391000 | 1.587619000  |
| 1  | 2.135818000  | -2.093001000 | 2.460670000  |
| 1  | 3.729128000  | -1.772523000 | 1.716130000  |
| 1  | 2.381836000  | -0.633171000 | 1.458547000  |



13 -0.428965000 -0.760571000 -0.462341000

**6AITS<sup>B-H</sup>** (T.E = -1685.790688)

|    |              |              |              |
|----|--------------|--------------|--------------|
| 7  | -0.634034000 | 1.934768000  | -0.309099000 |
| 6  | -1.710722000 | 2.590165000  | -0.006941000 |
| 1  | -1.619839000 | 3.667836000  | 0.147449000  |
| 6  | 0.614903000  | 2.617732000  | -0.259645000 |
| 6  | 1.443965000  | 2.594955000  | -1.369829000 |
| 6  | 1.043529000  | 3.206641000  | 0.920938000  |
| 6  | 2.694252000  | 3.179458000  | -1.302726000 |
| 1  | 1.110107000  | 2.094005000  | -2.271403000 |
| 6  | 2.296230000  | 3.792286000  | 0.980659000  |
| 1  | 0.407445000  | 3.161898000  | 1.798726000  |
| 6  | 3.123180000  | 3.777905000  | -0.129499000 |
| 1  | 3.343622000  | 3.153483000  | -2.169419000 |
| 1  | 2.633923000  | 4.243248000  | 1.906312000  |
| 1  | 4.109098000  | 4.224288000  | -0.076819000 |
| 6  | -3.382267000 | 0.697489000  | 0.100246000  |
| 13 | -0.562029000 | 0.031037000  | -0.523392000 |
| 6  | 3.422500000  | -1.038408000 | 0.303701000  |
| 6  | 2.834697000  | -2.459560000 | 0.075297000  |
| 8  | 2.471514000  | -0.215242000 | -0.364845000 |
| 8  | 1.428973000  | -2.222372000 | 0.092433000  |
| 5  | 1.228672000  | -0.857516000 | -0.229803000 |
| 6  | 3.186562000  | -3.023247000 | -1.292046000 |
| 1  | 4.239009000  | -3.309659000 | -1.361738000 |
| 1  | 2.577966000  | -3.913162000 | -1.466553000 |
| 1  | 2.963203000  | -2.300560000 | -2.079536000 |
| 6  | 3.182753000  | -3.465940000 | 1.148009000  |
| 1  | 2.738351000  | -4.433395000 | 0.902966000  |
| 1  | 4.266413000  | -3.600225000 | 1.218577000  |
| 1  | 2.804173000  | -3.157813000 | 2.122476000  |
| 6  | 3.447213000  | -0.637131000 | 1.770020000  |
| 1  | 4.216610000  | -1.174329000 | 2.329827000  |
| 1  | 3.661372000  | 0.432936000  | 1.827699000  |
| 1  | 2.479482000  | -0.809672000 | 2.246013000  |
| 6  | 4.782905000  | -0.802964000 | -0.310197000 |
| 1  | 5.105112000  | 0.218796000  | -0.094847000 |
| 1  | 5.525852000  | -1.489208000 | 0.107237000  |
| 1  | 4.759476000  | -0.926163000 | -1.392882000 |
| 1  | 0.471180000  | -0.264177000 | 0.944560000  |
| 6  | -2.433285000 | -0.279726000 | -0.226907000 |
| 15 | -3.052535000 | -1.868853000 | -0.106721000 |
| 6  | -3.598902000 | -2.322939000 | 1.551415000  |
| 1  | -4.383484000 | -1.633051000 | 1.861942000  |
| 1  | -3.977152000 | -3.346927000 | 1.569219000  |
| 1  | -2.751111000 | -2.235149000 | 2.232537000  |
| 6  | -4.449990000 | -2.246002000 | -1.183830000 |

|   |              |              |              |
|---|--------------|--------------|--------------|
| 1 | -4.148272000 | -2.101878000 | -2.221893000 |
| 1 | -4.776527000 | -3.277874000 | -1.040060000 |
| 1 | -5.264464000 | -1.561495000 | -0.949026000 |
| 6 | -1.773664000 | -3.055678000 | -0.534219000 |
| 1 | -2.163228000 | -4.069181000 | -0.420685000 |
| 1 | -1.459160000 | -2.904699000 | -1.568508000 |
| 1 | -0.890687000 | -2.933613000 | 0.100825000  |
| 8 | -4.570421000 | 0.543935000  | 0.369143000  |
| 7 | -2.945999000 | 2.110864000  | 0.140109000  |
| 6 | -4.012517000 | 3.058582000  | 0.431281000  |
| 1 | -4.790313000 | 3.000117000  | -0.329100000 |
| 1 | -4.472419000 | 2.832524000  | 1.392175000  |
| 1 | -3.600975000 | 4.066510000  | 0.449996000  |

**8AITS<sup>B-H</sup>** (T.E = -1919.843861)

|    |              |              |              |
|----|--------------|--------------|--------------|
| 7  | -0.433845000 | 1.529557000  | -0.873543000 |
| 6  | -1.717781000 | 2.112327000  | -0.694180000 |
| 6  | -2.867970000 | 1.503349000  | -1.368369000 |
| 7  | -1.993931000 | -0.862800000 | -0.691979000 |
| 1  | -2.638754000 | 1.462207000  | -2.443088000 |
| 6  | -2.015848000 | -2.055360000 | 0.058343000  |
| 6  | -1.319684000 | -3.181578000 | -0.376523000 |
| 6  | -2.646885000 | -2.111620000 | 1.302906000  |
| 6  | -1.251917000 | -4.320521000 | 0.407127000  |
| 1  | -0.811121000 | -3.148848000 | -1.335800000 |
| 6  | -2.595997000 | -3.258412000 | 2.071664000  |
| 1  | -3.174178000 | -1.231988000 | 1.659968000  |
| 6  | -1.895060000 | -4.371152000 | 1.631317000  |
| 1  | -0.688910000 | -5.175863000 | 0.051274000  |
| 1  | -3.096731000 | -3.278646000 | 3.033597000  |
| 1  | -1.845818000 | -5.265077000 | 2.241489000  |
| 6  | 3.434856000  | -2.248194000 | -0.118836000 |
| 6  | 3.891091000  | -0.823888000 | -0.544591000 |
| 5  | -3.130336000 | -0.039501000 | -0.936787000 |
| 7  | -4.476676000 | -0.509475000 | -0.936578000 |
| 6  | -4.834274000 | -1.905016000 | -1.057607000 |
| 1  | -3.973428000 | -2.513994000 | -1.324137000 |
| 1  | -5.257769000 | -2.306218000 | -0.127330000 |
| 1  | -5.590507000 | -2.023942000 | -1.843317000 |
| 6  | -5.656751000 | 0.312971000  | -0.854958000 |
| 1  | -5.417804000 | 1.350133000  | -0.628884000 |
| 1  | -6.237516000 | 0.288915000  | -1.787196000 |
| 1  | -6.317863000 | -0.048811000 | -0.056837000 |
| 1  | -3.749579000 | 2.134478000  | -1.261991000 |
| 15 | 0.095428000  | 2.602805000  | 0.270867000  |
| 6  | -1.568146000 | 3.148352000  | 0.183452000  |
| 6  | -2.481924000 | 4.148849000  | 0.772438000  |
| 1  | -2.500810000 | 4.100729000  | 1.866273000  |

|    |              |              |              |
|----|--------------|--------------|--------------|
| 1  | -2.213044000 | 5.174537000  | 0.502524000  |
| 1  | -3.503567000 | 3.979693000  | 0.423409000  |
| 7  | 0.513176000  | 2.075982000  | 1.766020000  |
| 7  | 1.347888000  | 3.480994000  | -0.297944000 |
| 6  | 1.872150000  | 1.649655000  | 2.073498000  |
| 1  | 2.129683000  | 1.975261000  | 3.085358000  |
| 1  | 1.954713000  | 0.560811000  | 2.003748000  |
| 1  | 2.584628000  | 2.071256000  | 1.366665000  |
| 6  | -0.485068000 | 1.421721000  | 2.601142000  |
| 1  | -1.481064000 | 1.804792000  | 2.380578000  |
| 1  | -0.479815000 | 0.337862000  | 2.430571000  |
| 1  | -0.256674000 | 1.616449000  | 3.652299000  |
| 6  | 2.227762000  | 3.031120000  | -1.362150000 |
| 1  | 3.225704000  | 2.811245000  | -0.963672000 |
| 1  | 1.848921000  | 2.115726000  | -1.813272000 |
| 1  | 2.313754000  | 3.807800000  | -2.127955000 |
| 6  | 1.792844000  | 4.649954000  | 0.428043000  |
| 1  | 1.951242000  | 5.480842000  | -0.265922000 |
| 1  | 1.044880000  | 4.958287000  | 1.161574000  |
| 1  | 2.734563000  | 4.462245000  | 0.959058000  |
| 5  | 1.611928000  | -1.021462000 | -0.691312000 |
| 8  | 2.129449000  | -2.322902000 | -0.680769000 |
| 8  | 2.676854000  | -0.085564000 | -0.500353000 |
| 6  | 3.309757000  | -2.406340000 | 1.387985000  |
| 1  | 2.793358000  | -3.346759000 | 1.592424000  |
| 1  | 4.283653000  | -2.431878000 | 1.883049000  |
| 1  | 2.711922000  | -1.603425000 | 1.824743000  |
| 6  | 4.275197000  | -3.372987000 | -0.677867000 |
| 1  | 5.316054000  | -3.281652000 | -0.352768000 |
| 1  | 3.890894000  | -4.329887000 | -0.318371000 |
| 1  | 4.247039000  | -3.388290000 | -1.767134000 |
| 6  | 4.898675000  | -0.177123000 | 0.379108000  |
| 1  | 5.827107000  | -0.754695000 | 0.413189000  |
| 1  | 5.139969000  | 0.824819000  | 0.012761000  |
| 1  | 4.512679000  | -0.082588000 | 1.394448000  |
| 6  | 4.404989000  | -0.776412000 | -1.975402000 |
| 1  | 4.506710000  | 0.270900000  | -2.271714000 |
| 1  | 5.379882000  | -1.258132000 | -2.083694000 |
| 1  | 3.697035000  | -1.251585000 | -2.657515000 |
| 1  | 0.698717000  | -0.747220000 | 0.499046000  |
| 13 | -0.248730000 | -0.331240000 | -1.031598000 |

**10AITS<sup>B-H</sup> (T.E = -2011.344478)**

|   |              |             |              |
|---|--------------|-------------|--------------|
| 7 | -1.634846000 | 0.394562000 | 0.192429000  |
| 6 | -2.686248000 | 1.251020000 | -0.241546000 |
| 6 | -2.511609000 | 2.628202000 | -0.390065000 |
| 1 | -3.381897000 | 3.209628000 | -0.672317000 |
| 6 | -1.290606000 | 3.289820000 | -0.250265000 |

|    |              |              |              |
|----|--------------|--------------|--------------|
| 1  | -1.362693000 | 4.366907000  | -0.434681000 |
| 6  | 2.467000000  | -2.570399000 | -0.316435000 |
| 6  | 3.602482000  | -1.641615000 | 0.199220000  |
| 8  | 1.302681000  | -1.922738000 | 0.190439000  |
| 8  | 3.002362000  | -0.353278000 | 0.156478000  |
| 5  | 1.594968000  | -0.530115000 | 0.220264000  |
| 6  | 3.972473000  | -1.926713000 | 1.646941000  |
| 1  | 4.515323000  | -2.868914000 | 1.757949000  |
| 1  | 4.613852000  | -1.118357000 | 2.004282000  |
| 1  | 3.081321000  | -1.953781000 | 2.277535000  |
| 6  | 4.851123000  | -1.639049000 | -0.653541000 |
| 1  | 5.594607000  | -0.972246000 | -0.210849000 |
| 1  | 5.288232000  | -2.640541000 | -0.711887000 |
| 1  | 4.643475000  | -1.287780000 | -1.664296000 |
| 6  | 2.380167000  | -2.600177000 | -1.834317000 |
| 1  | 3.221313000  | -3.133523000 | -2.283056000 |
| 1  | 1.459938000  | -3.116398000 | -2.121490000 |
| 1  | 2.341841000  | -1.589513000 | -2.247600000 |
| 6  | 2.509192000  | -3.983569000 | 0.218008000  |
| 1  | 1.684945000  | -4.561974000 | -0.207435000 |
| 1  | 3.444480000  | -4.480119000 | -0.057001000 |
| 1  | 2.408019000  | -4.002699000 | 1.303106000  |
| 1  | 1.031822000  | 0.095846000  | -1.058667000 |
| 6  | -0.041486000 | 2.764445000  | 0.064081000  |
| 15 | 1.381997000  | 3.684419000  | 0.081673000  |
| 6  | 1.197324000  | 5.420426000  | -0.380593000 |
| 1  | 2.166940000  | 5.919131000  | -0.341630000 |
| 1  | 0.797505000  | 5.494506000  | -1.392533000 |
| 1  | 0.512653000  | 5.919500000  | 0.306336000  |
| 6  | 2.196696000  | 3.693306000  | 1.693558000  |
| 1  | 1.542010000  | 4.152355000  | 2.434829000  |
| 1  | 2.383412000  | 2.655965000  | 1.982831000  |
| 1  | 3.146421000  | 4.230683000  | 1.652424000  |
| 6  | 2.642908000  | 3.000780000  | -1.009796000 |
| 1  | 2.259566000  | 2.968803000  | -2.030236000 |
| 1  | 3.555259000  | 3.600001000  | -0.971120000 |
| 1  | 2.873467000  | 1.975903000  | -0.697496000 |
| 15 | -2.676486000 | -0.877598000 | -0.022046000 |
| 6  | -3.763353000 | 0.376852000  | -0.475882000 |
| 7  | -2.151266000 | -1.976267000 | -1.126967000 |
| 7  | -2.939484000 | -1.769579000 | 1.349350000  |
| 6  | -1.527136000 | -1.432613000 | -2.323356000 |
| 1  | -1.887751000 | -0.420282000 | -2.513655000 |
| 1  | -0.436306000 | -1.393896000 | -2.218940000 |
| 1  | -1.788205000 | -2.056033000 | -3.183053000 |
| 6  | -1.838063000 | -3.367400000 | -0.880634000 |
| 1  | -2.423603000 | -3.749549000 | -0.046905000 |
| 1  | -2.087055000 | -3.951657000 | -1.771423000 |
| 1  | -0.769602000 | -3.499703000 | -0.662728000 |

|    |              |              |              |
|----|--------------|--------------|--------------|
| 6  | -4.004912000 | -1.334248000 | 2.233389000  |
| 1  | -4.241172000 | -2.143736000 | 2.929231000  |
| 1  | -3.717641000 | -0.449583000 | 2.818432000  |
| 1  | -4.903072000 | -1.094699000 | 1.665233000  |
| 6  | -1.738496000 | -2.180648000 | 2.072632000  |
| 1  | -0.884319000 | -2.312193000 | 1.403103000  |
| 1  | -1.455650000 | -1.421400000 | 2.812529000  |
| 1  | -1.921779000 | -3.126326000 | 2.591309000  |
| 6  | -5.146813000 | 0.590427000  | -0.954395000 |
| 1  | -5.877709000 | 0.729552000  | -0.147648000 |
| 1  | -5.198342000 | 1.481973000  | -1.586410000 |
| 1  | -5.497552000 | -0.247833000 | -1.562132000 |
| 13 | 0.129978000  | 0.842431000  | 0.362387000  |

**11AITS<sup>B-H</sup> (T.E = -1929.142772)**

|    |              |              |              |
|----|--------------|--------------|--------------|
| 7  | 0.596145000  | -2.404579000 | -0.287038000 |
| 7  | 1.444681000  | 0.165697000  | -0.184223000 |
| 6  | -0.397482000 | -3.424970000 | -0.223374000 |
| 6  | -1.388128000 | -3.442033000 | -1.196711000 |
| 6  | -0.470040000 | -4.328036000 | 0.832269000  |
| 6  | -2.438038000 | -4.341864000 | -1.118268000 |
| 1  | -1.334633000 | -2.739103000 | -2.023119000 |
| 6  | -1.511092000 | -5.232808000 | 0.897493000  |
| 1  | 0.295229000  | -4.318108000 | 1.597204000  |
| 6  | -2.501044000 | -5.244408000 | -0.073764000 |
| 1  | -3.205213000 | -4.334585000 | -1.883408000 |
| 1  | -1.555064000 | -5.933126000 | 1.723860000  |
| 1  | -3.318335000 | -5.953146000 | -0.011695000 |
| 6  | 2.687724000  | -0.397615000 | 0.103280000  |
| 13 | -0.135287000 | -0.705566000 | -0.509691000 |
| 6  | -3.898716000 | 1.100116000  | 0.209586000  |
| 6  | -2.978235000 | 2.325896000  | -0.042507000 |
| 8  | -3.168850000 | 0.046561000  | -0.413913000 |
| 8  | -1.675460000 | 1.753523000  | 0.039550000  |
| 5  | -1.815240000 | 0.361692000  | -0.282044000 |
| 6  | -3.138274000 | 2.902676000  | -1.440515000 |
| 1  | -4.093358000 | 3.417410000  | -1.569667000 |
| 1  | -2.338789000 | 3.629120000  | -1.610977000 |
| 1  | -3.053146000 | 2.118985000  | -2.196556000 |
| 6  | -3.101975000 | 3.431567000  | 0.981378000  |
| 1  | -2.444728000 | 4.262682000  | 0.709831000  |
| 1  | -4.124798000 | 3.817374000  | 1.019979000  |
| 1  | -2.821369000 | 3.088843000  | 1.978134000  |
| 6  | -4.042571000 | 0.772663000  | 1.686944000  |
| 1  | -4.662160000 | 1.504928000  | 2.210125000  |
| 1  | -4.516365000 | -0.206633000 | 1.777981000  |
| 1  | -3.069126000 | 0.717165000  | 2.179989000  |
| 6  | -5.264322000 | 1.191941000  | -0.429757000 |

|    |              |              |              |
|----|--------------|--------------|--------------|
| 1  | -5.841623000 | 0.297723000  | -0.186426000 |
| 1  | -5.813303000 | 2.061841000  | -0.056981000 |
| 1  | -5.192581000 | 1.259276000  | -1.515180000 |
| 1  | -1.191765000 | -0.357099000 | 0.926700000  |
| 15 | 2.122639000  | 1.656285000  | 0.097992000  |
| 6  | 3.521609000  | 0.675811000  | 0.427908000  |
| 7  | 1.318431000  | 2.486885000  | 1.246734000  |
| 7  | 2.183941000  | 2.657194000  | -1.200946000 |
| 6  | 0.704399000  | 1.752051000  | 2.343631000  |
| 1  | 1.095574000  | 0.736554000  | 2.398364000  |
| 1  | 0.924987000  | 2.257275000  | 3.287626000  |
| 1  | -0.379310000 | 1.694576000  | 2.194703000  |
| 6  | 0.959623000  | 3.887923000  | 1.202108000  |
| 1  | 1.506020000  | 4.403400000  | 0.415548000  |
| 1  | -0.116955000 | 3.996906000  | 1.023580000  |
| 1  | 1.202623000  | 4.358622000  | 2.159067000  |
| 6  | 3.309339000  | 2.587847000  | -2.114043000 |
| 1  | 3.197351000  | 1.770940000  | -2.838171000 |
| 1  | 3.375178000  | 3.528183000  | -2.667218000 |
| 1  | 4.241111000  | 2.443945000  | -1.568741000 |
| 6  | 0.911563000  | 2.963427000  | -1.852537000 |
| 1  | 0.068996000  | 2.784272000  | -1.178548000 |
| 1  | 0.896008000  | 4.008088000  | -2.176924000 |
| 1  | 0.769264000  | 2.319209000  | -2.727865000 |
| 6  | 4.926233000  | 0.893850000  | 0.858114000  |
| 1  | 5.023983000  | 1.885883000  | 1.305137000  |
| 1  | 5.247117000  | 0.179153000  | 1.619034000  |
| 1  | 5.652948000  | 0.845718000  | 0.038202000  |
| 7  | 2.888681000  | -1.726010000 | 0.015390000  |
| 6  | 4.251063000  | -2.214101000 | 0.182901000  |
| 1  | 4.475300000  | -2.433555000 | 1.229268000  |
| 1  | 4.369751000  | -3.132076000 | -0.384231000 |
| 1  | 4.944832000  | -1.463755000 | -0.188701000 |
| 6  | 1.879848000  | -2.774124000 | -0.070317000 |
| 8  | 2.286710000  | -3.904366000 | 0.054807000  |

**13AITS<sup>B-H</sup>** (T.E = -2254.692097)

|   |              |              |              |
|---|--------------|--------------|--------------|
| 7 | 0.570271000  | -1.598749000 | 0.240312000  |
| 6 | -0.075650000 | -2.781957000 | -0.237054000 |
| 6 | -1.446838000 | -2.857581000 | -0.469665000 |
| 1 | -1.859591000 | -3.796423000 | -0.821429000 |
| 6 | -2.308678000 | -1.775246000 | -0.335379000 |
| 6 | 2.770372000  | 2.939531000  | -0.269262000 |
| 6 | 1.638810000  | 3.922206000  | 0.144970000  |
| 8 | 2.301090000  | 1.706487000  | 0.272962000  |
| 8 | 0.473009000  | 3.109926000  | 0.082160000  |
| 5 | 0.880418000  | 1.767614000  | 0.230005000  |
| 6 | 1.784917000  | 4.404124000  | 1.580212000  |

|    |              |              |              |
|----|--------------|--------------|--------------|
| 1  | 2.613727000  | 5.106789000  | 1.698826000  |
| 1  | 0.861914000  | 4.911329000  | 1.868382000  |
| 1  | 1.932888000  | 3.562280000  | 2.259838000  |
| 6  | 1.466888000  | 5.109719000  | -0.775118000 |
| 1  | 0.663100000  | 5.747697000  | -0.400921000 |
| 1  | 2.381792000  | 5.708585000  | -0.817803000 |
| 1  | 1.204587000  | 4.797010000  | -1.785852000 |
| 6  | 2.891146000  | 2.788493000  | -1.777329000 |
| 1  | 3.298812000  | 3.686102000  | -2.247727000 |
| 1  | 3.567912000  | 1.956754000  | -1.992641000 |
| 1  | 1.923219000  | 2.561451000  | -2.230496000 |
| 6  | 4.127429000  | 3.245038000  | 0.321479000  |
| 1  | 4.856287000  | 2.510960000  | -0.032034000 |
| 1  | 4.474130000  | 4.236570000  | 0.015615000  |
| 1  | 4.107595000  | 3.201145000  | 1.410311000  |
| 1  | 0.430268000  | 1.019841000  | -1.048914000 |
| 15 | -3.460929000 | 0.005443000  | -0.048955000 |
| 15 | 2.011627000  | -2.390251000 | 0.037355000  |
| 6  | 0.983721000  | -3.684121000 | -0.434504000 |
| 7  | 3.007980000  | -1.689622000 | -1.067176000 |
| 7  | 2.930378000  | -2.477883000 | 1.413529000  |
| 6  | 2.380702000  | -1.211349000 | -2.289285000 |
| 1  | 1.443898000  | -1.741931000 | -2.468619000 |
| 1  | 2.159219000  | -0.139536000 | -2.228830000 |
| 1  | 3.047301000  | -1.397975000 | -3.136080000 |
| 6  | 4.325019000  | -1.142877000 | -0.825371000 |
| 1  | 4.792983000  | -1.634124000 | 0.025263000  |
| 1  | 4.949776000  | -1.313851000 | -1.707092000 |
| 1  | 4.278202000  | -0.062098000 | -0.636194000 |
| 6  | 2.681507000  | -3.594536000 | 2.306784000  |
| 1  | 3.514286000  | -3.678381000 | 3.010016000  |
| 1  | 1.755445000  | -3.460868000 | 2.883053000  |
| 1  | 2.607298000  | -4.526432000 | 1.747136000  |
| 6  | 3.112876000  | -1.215612000 | 2.126171000  |
| 1  | 3.094317000  | -0.357271000 | 1.448812000  |
| 1  | 2.309759000  | -1.067193000 | 2.859182000  |
| 1  | 4.071733000  | -1.220651000 | 2.652702000  |
| 6  | 1.042379000  | -5.069318000 | -0.950785000 |
| 1  | 0.183520000  | -5.273671000 | -1.596853000 |
| 1  | 1.938401000  | -5.237353000 | -1.554457000 |
| 1  | 1.038139000  | -5.833569000 | -0.163758000 |
| 7  | -1.897668000 | -0.477085000 | 0.139048000  |
| 6  | -3.677790000 | -1.609009000 | -0.599336000 |
| 6  | -4.714265000 | -2.551084000 | -1.076764000 |
| 1  | -4.291784000 | -3.255141000 | -1.800007000 |
| 1  | -5.166173000 | -3.151661000 | -0.276404000 |
| 1  | -5.529697000 | -2.031178000 | -1.584757000 |
| 7  | -3.532166000 | 1.371952000  | -0.965575000 |
| 7  | -4.266830000 | 0.455766000  | 1.326814000  |

|    |              |              |              |
|----|--------------|--------------|--------------|
| 6  | -4.631604000 | 2.311045000  | -0.978393000 |
| 1  | -5.178841000 | 2.257824000  | -1.926713000 |
| 1  | -5.325741000 | 2.106048000  | -0.165834000 |
| 1  | -4.253030000 | 3.333088000  | -0.865529000 |
| 6  | -3.720198000 | 1.569496000  | 2.090207000  |
| 1  | -4.523729000 | 2.100542000  | 2.608969000  |
| 1  | -2.999045000 | 1.212633000  | 2.836472000  |
| 1  | -3.200888000 | 2.272820000  | 1.438481000  |
| 6  | -4.796202000 | -0.596431000 | 2.175489000  |
| 1  | -5.544615000 | -0.168939000 | 2.847996000  |
| 1  | -5.270708000 | -1.371622000 | 1.576247000  |
| 1  | -4.010609000 | -1.062010000 | 2.785794000  |
| 6  | -2.603727000 | 1.539531000  | -2.071812000 |
| 1  | -2.050842000 | 2.478163000  | -1.962200000 |
| 1  | -1.874493000 | 0.730303000  | -2.096202000 |
| 1  | -3.143845000 | 1.553349000  | -3.024489000 |
| 13 | -0.169063000 | 0.065109000  | 0.406599000  |

**1GaTS<sup>B-H</sup>** (T.E = -3024.789056)

|   |              |              |              |
|---|--------------|--------------|--------------|
| 7 | -1.271011000 | -2.161131000 | -0.346780000 |
| 6 | -0.960023000 | -3.434116000 | -0.459882000 |
| 6 | 0.315385000  | -3.968006000 | -0.585056000 |
| 7 | 1.625942000  | -1.954917000 | -0.306972000 |
| 1 | 0.393376000  | -5.036890000 | -0.723749000 |
| 1 | -1.792420000 | -4.139613000 | -0.449251000 |
| 6 | -2.597448000 | -1.789498000 | -0.028662000 |
| 6 | -3.127261000 | -0.626047000 | -0.572681000 |
| 6 | -3.366968000 | -2.541626000 | 0.854259000  |
| 6 | -4.411624000 | -0.231594000 | -0.251655000 |
| 1 | -2.524407000 | -0.019819000 | -1.239239000 |
| 6 | -4.657347000 | -2.148366000 | 1.158687000  |
| 1 | -2.939056000 | -3.414356000 | 1.334548000  |
| 6 | -5.186163000 | -0.993579000 | 0.607331000  |
| 1 | -4.805784000 | 0.683311000  | -0.678634000 |
| 1 | -5.244799000 | -2.738713000 | 1.852317000  |
| 1 | -6.192375000 | -0.680728000 | 0.859270000  |
| 6 | 2.882872000  | -1.403292000 | 0.029700000  |
| 6 | 3.231060000  | -0.151465000 | -0.464049000 |
| 6 | 3.762822000  | -2.068259000 | 0.879354000  |
| 6 | 4.448019000  | 0.412190000  | -0.133328000 |
| 1 | 2.539309000  | 0.388082000  | -1.101675000 |
| 6 | 4.984603000  | -1.503131000 | 1.194757000  |
| 1 | 3.473586000  | -3.012493000 | 1.326432000  |
| 6 | 5.334944000  | -0.262859000 | 0.688567000  |
| 1 | 4.699818000  | 1.391936000  | -0.522041000 |
| 1 | 5.658097000  | -2.028520000 | 1.861938000  |
| 1 | 6.287434000  | 0.183064000  | 0.948661000  |
| 6 | 1.498478000  | -3.258904000 | -0.435798000 |



|    |              |              |              |
|----|--------------|--------------|--------------|
| 1  | 2.421379000  | -3.840365000 | -0.417627000 |
| 6  | -1.046891000 | 3.170727000  | 0.268170000  |
| 6  | 0.436692000  | 3.419157000  | -0.125188000 |
| 8  | -1.294914000 | 1.885988000  | -0.319380000 |
| 8  | 0.985218000  | 2.094833000  | -0.118879000 |
| 5  | -0.079412000 | 1.219012000  | -0.292478000 |
| 6  | 0.588903000  | 3.963364000  | -1.534476000 |
| 1  | 0.264102000  | 5.003914000  | -1.606838000 |
| 1  | 1.643198000  | 3.914257000  | -1.813856000 |
| 1  | 0.020667000  | 3.366217000  | -2.250638000 |
| 6  | 1.213075000  | 4.275648000  | 0.846314000  |
| 1  | 2.237560000  | 4.399019000  | 0.488706000  |
| 1  | 0.761650000  | 5.268431000  | 0.931598000  |
| 1  | 1.254526000  | 3.822236000  | 1.836078000  |
| 6  | -1.251186000 | 3.035519000  | 1.766428000  |
| 1  | -1.160094000 | 3.996921000  | 2.276674000  |
| 1  | -2.255584000 | 2.643869000  | 1.942834000  |
| 1  | -0.538061000 | 2.334750000  | 2.205684000  |
| 6  | -2.032421000 | 4.162584000  | -0.299803000 |
| 1  | -3.040497000 | 3.906624000  | 0.033856000  |
| 1  | -1.806680000 | 5.174211000  | 0.049339000  |
| 1  | -2.025824000 | 4.158097000  | -1.389475000 |
| 1  | -0.036232000 | 0.158961000  | 0.985919000  |
| 31 | 0.088390000  | -0.753625000 | -0.568195000 |

**4GaTS<sup>B-H</sup> (T.E = -3237.590367)**

|   |              |              |              |
|---|--------------|--------------|--------------|
| 7 | -2.181149000 | -1.259627000 | -0.232421000 |
| 6 | -2.493525000 | -2.556191000 | -0.198448000 |
| 6 | -1.645699000 | -3.638115000 | -0.144349000 |
| 1 | -2.117219000 | -4.612643000 | -0.147907000 |
| 1 | -3.559417000 | -2.784377000 | -0.225732000 |
| 6 | -3.196263000 | -0.295898000 | -0.089444000 |
| 6 | -3.020679000 | 0.965770000  | -0.653378000 |
| 6 | -4.359431000 | -0.543036000 | 0.639895000  |
| 6 | -3.990667000 | 1.939041000  | -0.516766000 |
| 1 | -2.109389000 | 1.182215000  | -1.201351000 |
| 6 | -5.331103000 | 0.433415000  | 0.762672000  |
| 1 | -4.489804000 | -1.491592000 | 1.147307000  |
| 6 | -5.157304000 | 1.678678000  | 0.183603000  |
| 1 | -3.827788000 | 2.912812000  | -0.964148000 |
| 1 | -6.225276000 | 0.222077000  | 1.338454000  |
| 1 | -5.916225000 | 2.444336000  | 0.291718000  |
| 6 | -0.240283000 | -3.589043000 | -0.035266000 |
| 1 | 0.235425000  | -4.565286000 | 0.096088000  |
| 6 | 1.043685000  | 3.234130000  | 0.248276000  |
| 6 | 2.368886000  | 2.499065000  | -0.098571000 |
| 8 | 0.061991000  | 2.369196000  | -0.329023000 |
| 8 | 1.978065000  | 1.125554000  | -0.061583000 |

|    |              |              |              |
|----|--------------|--------------|--------------|
| 5  | 0.574320000  | 1.080188000  | -0.250503000 |
| 6  | 2.853839000  | 2.790092000  | -1.508669000 |
| 1  | 3.246923000  | 3.804573000  | -1.608040000 |
| 1  | 3.656171000  | 2.088993000  | -1.752235000 |
| 1  | 2.049968000  | 2.650184000  | -2.234248000 |
| 6  | 3.493765000  | 2.712734000  | 0.887650000  |
| 1  | 4.376618000  | 2.156755000  | 0.561531000  |
| 1  | 3.765386000  | 3.770479000  | 0.949677000  |
| 1  | 3.222858000  | 2.363141000  | 1.884451000  |
| 6  | 0.782709000  | 3.303714000  | 1.743021000  |
| 1  | 1.457243000  | 4.003229000  | 2.242137000  |
| 1  | -0.243218000 | 3.643135000  | 1.898451000  |
| 1  | 0.879808000  | 2.320855000  | 2.210502000  |
| 6  | 0.904671000  | 4.608279000  | -0.362089000 |
| 1  | -0.045876000 | 5.049035000  | -0.055146000 |
| 1  | 1.709348000  | 5.266847000  | -0.021992000 |
| 1  | 0.920583000  | 4.567486000  | -1.451010000 |
| 1  | 0.014853000  | 0.311644000  | 1.101678000  |
| 31 | -0.315183000 | -0.698182000 | -0.390017000 |
| 6  | 0.531119000  | -2.463087000 | -0.078135000 |
| 15 | 2.231793000  | -2.501973000 | 0.157204000  |
| 6  | 2.915916000  | -4.161719000 | 0.332020000  |
| 1  | 3.996748000  | -4.096180000 | 0.465710000  |
| 1  | 2.481046000  | -4.658694000 | 1.199847000  |
| 1  | 2.701905000  | -4.751843000 | -0.559770000 |
| 6  | 3.116209000  | -1.718019000 | -1.197000000 |
| 1  | 2.861098000  | -2.207001000 | -2.137412000 |
| 1  | 2.819059000  | -0.665406000 | -1.233881000 |
| 1  | 4.192953000  | -1.780048000 | -1.026012000 |
| 6  | 2.730744000  | -1.587807000 | 1.622667000  |
| 1  | 2.237011000  | -2.006073000 | 2.500294000  |
| 1  | 3.814950000  | -1.634146000 | 1.745382000  |
| 1  | 2.424495000  | -0.544840000 | 1.496306000  |

**6GaTS<sup>B-H</sup> (T.E = -3368.168344)**

|   |              |             |              |
|---|--------------|-------------|--------------|
| 7 | -0.524761000 | 1.920865000 | -0.253003000 |
| 6 | -1.573897000 | 2.609127000 | 0.042576000  |
| 1 | -1.447420000 | 3.682707000 | 0.206331000  |
| 6 | 0.746611000  | 2.550547000 | -0.209423000 |
| 6 | 1.543831000  | 2.550264000 | -1.343348000 |
| 6 | 1.229522000  | 3.069253000 | 0.982918000  |
| 6 | 2.816177000  | 3.084839000 | -1.287076000 |
| 1 | 1.164673000  | 2.101679000 | -2.254622000 |
| 6 | 2.506475000  | 3.601979000 | 1.033358000  |
| 1 | 0.614162000  | 3.008436000 | 1.874371000  |
| 6 | 3.301455000  | 3.609666000 | -0.099860000 |
| 1 | 3.439631000  | 3.077755000 | -2.173216000 |
| 1 | 2.886178000  | 3.997494000 | 1.968211000  |

|    |              |              |              |
|----|--------------|--------------|--------------|
| 1  | 4.304601000  | 4.017149000  | -0.056102000 |
| 6  | -3.333931000 | 0.798375000  | 0.115743000  |
| 6  | 3.455338000  | -1.024475000 | 0.328901000  |
| 6  | 2.917461000  | -2.461548000 | 0.072982000  |
| 8  | 2.463616000  | -0.219876000 | -0.313442000 |
| 8  | 1.498827000  | -2.270916000 | 0.070788000  |
| 5  | 1.267354000  | -0.919864000 | -0.204250000 |
| 6  | 3.301572000  | -2.997428000 | -1.295472000 |
| 1  | 4.363948000  | -3.246280000 | -1.354445000 |
| 1  | 2.726221000  | -3.905526000 | -1.486635000 |
| 1  | 3.064111000  | -2.274971000 | -2.079001000 |
| 6  | 3.280306000  | -3.468187000 | 1.139323000  |
| 1  | 2.872344000  | -4.446556000 | 0.876057000  |
| 1  | 4.366639000  | -3.566417000 | 1.224801000  |
| 1  | 2.877123000  | -3.183884000 | 2.110978000  |
| 6  | 3.473111000  | -0.646068000 | 1.799972000  |
| 1  | 4.261483000  | -1.168226000 | 2.346984000  |
| 1  | 3.653059000  | 0.429339000  | 1.873073000  |
| 1  | 2.512146000  | -0.854507000 | 2.275587000  |
| 6  | 4.797615000  | -0.722667000 | -0.293645000 |
| 1  | 5.077281000  | 0.308383000  | -0.064964000 |
| 1  | 5.571488000  | -1.383694000 | 0.107516000  |
| 1  | 4.770593000  | -0.830237000 | -1.377839000 |
| 1  | 0.402551000  | -0.336613000 | 1.117266000  |
| 31 | -0.529356000 | -0.075830000 | -0.432641000 |
| 6  | -2.441539000 | -0.239868000 | -0.171582000 |
| 15 | -3.154963000 | -1.785759000 | -0.040263000 |
| 6  | -4.516011000 | -2.124058000 | -1.175359000 |
| 1  | -4.907544000 | -3.131008000 | -1.017401000 |
| 1  | -5.300583000 | -1.388149000 | -1.001964000 |
| 1  | -4.156339000 | -2.029731000 | -2.200564000 |
| 6  | -1.916117000 | -3.045468000 | -0.370175000 |
| 1  | -1.526474000 | -2.930162000 | -1.382974000 |
| 1  | -1.077512000 | -2.949167000 | 0.324820000  |
| 1  | -2.359451000 | -4.037218000 | -0.264457000 |
| 6  | -3.801276000 | -2.170794000 | 1.599728000  |
| 1  | -4.564054000 | -1.435788000 | 1.855586000  |
| 1  | -4.229925000 | -3.174671000 | 1.622921000  |
| 1  | -2.982780000 | -2.105843000 | 2.318363000  |
| 8  | -4.539231000 | 0.695451000  | 0.342462000  |
| 7  | -2.834686000 | 2.179448000  | 0.171607000  |
| 6  | -3.861391000 | 3.173667000  | 0.451484000  |
| 1  | -4.630073000 | 3.155183000  | -0.320103000 |
| 1  | -4.345715000 | 2.967292000  | 1.404956000  |
| 1  | -3.403451000 | 4.161114000  | 0.480798000  |

**8GaTS<sup>B-H</sup>** (T.E = -3602.209562)

|   |              |             |              |
|---|--------------|-------------|--------------|
| 7 | -0.354855000 | 1.569641000 | -0.901361000 |
|---|--------------|-------------|--------------|

|    |              |              |              |
|----|--------------|--------------|--------------|
| 6  | -1.673329000 | 2.073879000  | -0.784492000 |
| 6  | -2.740953000 | 1.432627000  | -1.554462000 |
| 15 | 0.021800000  | 2.569287000  | 0.363888000  |
| 6  | -1.649840000 | 3.059840000  | 0.163872000  |
| 6  | -2.670131000 | 3.972086000  | 0.722455000  |
| 1  | -2.472425000 | 5.023655000  | 0.493481000  |
| 1  | -3.654005000 | 3.730621000  | 0.310867000  |
| 1  | -2.748654000 | 3.892347000  | 1.811682000  |
| 7  | 0.327414000  | 1.968420000  | 1.858695000  |
| 7  | 1.314025000  | 3.495660000  | -0.020228000 |
| 6  | 1.662497000  | 1.536044000  | 2.247040000  |
| 1  | 1.702321000  | 0.443054000  | 2.280564000  |
| 1  | 2.408142000  | 1.861416000  | 1.522144000  |
| 1  | 1.909391000  | 1.941226000  | 3.233542000  |
| 6  | -0.724498000 | 1.306716000  | 2.616984000  |
| 1  | -0.556650000 | 1.473116000  | 3.684659000  |
| 1  | -1.701735000 | 1.705144000  | 2.347222000  |
| 1  | -0.721080000 | 0.227444000  | 2.419678000  |
| 6  | 1.744190000  | 4.559580000  | 0.858685000  |
| 1  | 2.692827000  | 4.311531000  | 1.351646000  |
| 1  | 1.887747000  | 5.482810000  | 0.288755000  |
| 1  | 0.999243000  | 4.749228000  | 1.633240000  |
| 6  | 2.215371000  | 3.200471000  | -1.118641000 |
| 1  | 1.838349000  | 2.367668000  | -1.708444000 |
| 1  | 2.327534000  | 4.080031000  | -1.760206000 |
| 1  | 3.202005000  | 2.915902000  | -0.731859000 |
| 6  | -2.010603000 | -2.001651000 | 0.191236000  |
| 6  | -2.748198000 | -1.966577000 | 1.377108000  |
| 6  | -1.267701000 | -3.150127000 | -0.081579000 |
| 6  | -2.753606000 | -3.044277000 | 2.242779000  |
| 1  | -3.313714000 | -1.069908000 | 1.612786000  |
| 6  | -1.261867000 | -4.219322000 | 0.795752000  |
| 1  | -0.676452000 | -3.189346000 | -0.992257000 |
| 6  | -2.009430000 | -4.179104000 | 1.960878000  |
| 1  | -3.335827000 | -2.990651000 | 3.156446000  |
| 1  | -0.665184000 | -5.093880000 | 0.561683000  |
| 1  | -2.006618000 | -5.018563000 | 2.645780000  |
| 7  | -1.945193000 | -0.883679000 | -0.655255000 |
| 5  | -3.049776000 | -0.066971000 | -1.022060000 |
| 7  | -4.404193000 | -0.517096000 | -1.037343000 |
| 6  | -4.779804000 | -1.911276000 | -1.081642000 |
| 1  | -3.921996000 | -2.544564000 | -1.298115000 |
| 1  | -5.222603000 | -2.253531000 | -0.136537000 |
| 1  | -5.525219000 | -2.066719000 | -1.871461000 |
| 6  | -5.569153000 | 0.329641000  | -1.018107000 |
| 1  | -5.311496000 | 1.373147000  | -0.844542000 |
| 1  | -6.138764000 | 0.266146000  | -1.955474000 |
| 1  | -6.247436000 | 0.025577000  | -0.210003000 |
| 1  | -3.629738000 | 2.061190000  | -1.589874000 |

|    |              |              |              |
|----|--------------|--------------|--------------|
| 1  | -2.388962000 | 1.312514000  | -2.588064000 |
| 31 | -0.130226000 | -0.380714000 | -1.013741000 |
| 1  | 0.708536000  | -0.703791000 | 0.574349000  |
| 6  | 3.996054000  | -0.696807000 | -0.497818000 |
| 6  | 3.575652000  | -2.145707000 | -0.115004000 |
| 5  | 1.750094000  | -0.982009000 | -0.746398000 |
| 8  | 2.744187000  | -0.009610000 | -0.540708000 |
| 8  | 2.286076000  | -2.256771000 | -0.725580000 |
| 6  | 4.606527000  | -0.602140000 | -1.885577000 |
| 1  | 4.676579000  | 0.453367000  | -2.160028000 |
| 1  | 5.608954000  | -1.034766000 | -1.926336000 |
| 1  | 3.976104000  | -1.100591000 | -2.624599000 |
| 6  | 4.897592000  | -0.015255000 | 0.505782000  |
| 1  | 5.840231000  | -0.559045000 | 0.616038000  |
| 1  | 5.131563000  | 0.995439000  | 0.160873000  |
| 1  | 4.424560000  | 0.061463000  | 1.485137000  |
| 6  | 3.391032000  | -2.340150000 | 1.379794000  |
| 1  | 2.907354000  | -3.305222000 | 1.544203000  |
| 1  | 4.343308000  | -2.334327000 | 1.915072000  |
| 1  | 2.739997000  | -1.572213000 | 1.803014000  |
| 6  | 4.473850000  | -3.227990000 | -0.664592000 |
| 1  | 5.496412000  | -3.106399000 | -0.295143000 |
| 1  | 4.110297000  | -4.204870000 | -0.339920000 |
| 1  | 4.491122000  | -3.220486000 | -1.754023000 |

**10GaTS<sup>B-H</sup> (T.E = -3693.716577)**

|   |              |              |              |
|---|--------------|--------------|--------------|
| 7 | -1.637342000 | 0.335161000  | 0.159260000  |
| 6 | -2.688902000 | 1.199342000  | -0.236684000 |
| 6 | -2.524508000 | 2.581772000  | -0.356880000 |
| 1 | -3.404166000 | 3.164028000  | -0.606482000 |
| 6 | -1.308384000 | 3.248989000  | -0.227403000 |
| 1 | -1.390160000 | 4.329778000  | -0.380793000 |
| 6 | 2.422179000  | -2.671178000 | -0.311766000 |
| 6 | 3.577750000  | -1.758768000 | 0.189123000  |
| 8 | 1.268185000  | -1.982749000 | 0.177656000  |
| 8 | 2.993229000  | -0.457256000 | 0.149184000  |
| 5 | 1.601048000  | -0.617796000 | 0.205305000  |
| 6 | 3.959252000  | -2.038216000 | 1.633614000  |
| 1 | 4.488729000  | -2.987902000 | 1.743051000  |
| 1 | 4.617210000  | -1.238018000 | 1.978427000  |
| 1 | 3.076217000  | -2.049101000 | 2.275975000  |
| 6 | 4.814931000  | -1.774712000 | -0.678470000 |
| 1 | 5.573430000  | -1.118468000 | -0.246113000 |
| 1 | 5.235310000  | -2.783041000 | -0.739314000 |
| 1 | 4.600041000  | -1.422993000 | -1.687362000 |
| 6 | 2.330007000  | -2.725970000 | -1.827261000 |
| 1 | 3.162004000  | -3.279897000 | -2.267518000 |
| 1 | 1.401381000  | -3.232835000 | -2.102865000 |

|    |              |              |              |
|----|--------------|--------------|--------------|
| 1  | 2.303693000  | -1.721748000 | -2.257189000 |
| 6  | 2.426267000  | -4.072524000 | 0.252350000  |
| 1  | 1.583121000  | -4.634388000 | -0.157475000 |
| 1  | 3.345520000  | -4.600229000 | -0.018187000 |
| 1  | 2.331191000  | -4.068159000 | 1.338086000  |
| 1  | 0.995947000  | 0.088903000  | -1.212156000 |
| 31 | 0.204470000  | 0.800043000  | 0.296547000  |
| 6  | -0.046806000 | 2.737785000  | 0.046049000  |
| 15 | 1.370981000  | 3.662913000  | 0.031693000  |
| 6  | 1.145508000  | 5.423706000  | -0.297535000 |
| 1  | 2.111919000  | 5.929775000  | -0.280139000 |
| 1  | 0.687857000  | 5.562861000  | -1.277567000 |
| 1  | 0.497565000  | 5.865126000  | 0.460619000  |
| 6  | 2.291107000  | 3.563044000  | 1.581927000  |
| 1  | 1.685056000  | 3.962738000  | 2.395349000  |
| 1  | 2.500746000  | 2.509764000  | 1.784828000  |
| 1  | 3.233675000  | 4.110362000  | 1.515753000  |
| 6  | 2.561458000  | 3.073146000  | -1.188024000 |
| 1  | 2.116660000  | 3.127667000  | -2.182244000 |
| 1  | 3.481556000  | 3.660561000  | -1.154977000 |
| 1  | 2.793021000  | 2.024896000  | -0.975578000 |
| 15 | -2.681852000 | -0.928734000 | -0.046896000 |
| 6  | -3.775279000 | 0.333820000  | -0.467994000 |
| 7  | -2.176321000 | -2.027593000 | -1.161559000 |
| 7  | -2.936302000 | -1.833284000 | 1.321142000  |
| 6  | -1.563142000 | -1.488998000 | -2.364641000 |
| 1  | -1.881582000 | -0.457562000 | -2.524238000 |
| 1  | -0.469392000 | -1.496862000 | -2.291212000 |
| 1  | -1.875521000 | -2.082209000 | -3.229054000 |
| 6  | -1.930369000 | -3.434757000 | -0.947170000 |
| 1  | -2.509660000 | -3.800318000 | -0.101659000 |
| 1  | -2.231615000 | -3.993692000 | -1.838568000 |
| 1  | -0.864749000 | -3.627781000 | -0.761225000 |
| 6  | -3.970793000 | -1.375904000 | 2.230465000  |
| 1  | -4.199797000 | -2.177005000 | 2.938485000  |
| 1  | -3.654591000 | -0.491356000 | 2.800955000  |
| 1  | -4.880239000 | -1.126781000 | 1.684934000  |
| 6  | -1.726356000 | -2.260540000 | 2.018618000  |
| 1  | -0.891771000 | -2.408933000 | 1.328714000  |
| 1  | -1.412342000 | -1.501802000 | 2.746675000  |
| 1  | -1.913162000 | -3.200051000 | 2.547399000  |
| 6  | -5.175396000 | 0.563575000  | -0.887582000 |
| 1  | -5.246075000 | 1.465823000  | -1.502500000 |
| 1  | -5.555428000 | -0.261537000 | -1.495836000 |
| 1  | -5.875054000 | 0.693745000  | -0.051475000 |

**11GaTS<sup>B-H</sup> (T.E = -3611.504198)**

|   |              |             |              |
|---|--------------|-------------|--------------|
| 7 | -0.533110000 | 2.402479000 | -0.239146000 |
|---|--------------|-------------|--------------|

|    |              |              |              |
|----|--------------|--------------|--------------|
| 7  | -1.459275000 | -0.202364000 | -0.102568000 |
| 6  | 0.462857000  | 3.413059000  | -0.138129000 |
| 6  | 1.532380000  | 3.378781000  | -1.024889000 |
| 6  | 0.457790000  | 4.370453000  | 0.871760000  |
| 6  | 2.577592000  | 4.278556000  | -0.908237000 |
| 1  | 1.543979000  | 2.633866000  | -1.815252000 |
| 6  | 1.498725000  | 5.272426000  | 0.977164000  |
| 1  | -0.367526000 | 4.406097000  | 1.570003000  |
| 6  | 2.564224000  | 5.233555000  | 0.091118000  |
| 1  | 3.403406000  | 4.229555000  | -1.608307000 |
| 1  | 1.479975000  | 6.012408000  | 1.769378000  |
| 1  | 3.378982000  | 5.941915000  | 0.183730000  |
| 6  | -2.691593000 | 0.409349000  | 0.101787000  |
| 6  | 3.892595000  | -1.261002000 | 0.193058000  |
| 6  | 2.941438000  | -2.458661000 | -0.081907000 |
| 8  | 3.179817000  | -0.171340000 | -0.407116000 |
| 8  | 1.650584000  | -1.845796000 | -0.007608000 |
| 5  | 1.839407000  | -0.478556000 | -0.292224000 |
| 6  | 3.094229000  | -3.022851000 | -1.484588000 |
| 1  | 4.032554000  | -3.568357000 | -1.607893000 |
| 1  | 2.272047000  | -3.717520000 | -1.674220000 |
| 1  | 3.047092000  | -2.228942000 | -2.233013000 |
| 6  | 3.009366000  | -3.576940000 | 0.931119000  |
| 1  | 2.301017000  | -4.363090000 | 0.653947000  |
| 1  | 4.008621000  | -4.020666000 | 0.958491000  |
| 1  | 2.755264000  | -3.229119000 | 1.932788000  |
| 6  | 4.043127000  | -0.958494000 | 1.673198000  |
| 1  | 4.642263000  | -1.716329000 | 2.183201000  |
| 1  | 4.543502000  | 0.005633000  | 1.779933000  |
| 1  | 3.070741000  | -0.882849000 | 2.165842000  |
| 6  | 5.251891000  | -1.370084000 | -0.453928000 |
| 1  | 5.850566000  | -0.494591000 | -0.195748000 |
| 1  | 5.779752000  | -2.259323000 | -0.097026000 |
| 1  | 5.177066000  | -1.417715000 | -1.540040000 |
| 1  | 1.151946000  | 0.318508000  | 1.065468000  |
| 15 | -2.193493000 | -1.657279000 | 0.170916000  |
| 6  | -3.576200000 | -0.628431000 | 0.419897000  |
| 7  | -1.416513000 | -2.496877000 | 1.335667000  |
| 7  | -2.270186000 | -2.692386000 | -1.104057000 |
| 6  | -0.732472000 | -1.787273000 | 2.405297000  |
| 1  | -0.907562000 | -0.714937000 | 2.336829000  |
| 1  | -1.088115000 | -2.144274000 | 3.376151000  |
| 1  | 0.347725000  | -1.950760000 | 2.325668000  |
| 6  | -1.289380000 | -3.934894000 | 1.410720000  |
| 1  | -1.874288000 | -4.420038000 | 0.632390000  |
| 1  | -0.237245000 | -4.224789000 | 1.296459000  |
| 1  | -1.639037000 | -4.293112000 | 2.383979000  |
| 6  | -3.334899000 | -2.548702000 | -2.079858000 |
| 1  | -3.118861000 | -1.752851000 | -2.803995000 |

|    |              |              |              |
|----|--------------|--------------|--------------|
| 1  | -3.442474000 | -3.488701000 | -2.627122000 |
| 1  | -4.280895000 | -2.324740000 | -1.589491000 |
| 6  | -1.002856000 | -3.127078000 | -1.685148000 |
| 1  | -0.187739000 | -3.034771000 | -0.964073000 |
| 1  | -1.078073000 | -4.167253000 | -2.015495000 |
| 1  | -0.742883000 | -2.500906000 | -2.547241000 |
| 6  | -5.007906000 | -0.791033000 | 0.780531000  |
| 1  | -5.164642000 | -1.774527000 | 1.229670000  |
| 1  | -5.340269000 | -0.058788000 | 1.519869000  |
| 1  | -5.692996000 | -0.724897000 | -0.073888000 |
| 7  | -2.851177000 | 1.738118000  | -0.047877000 |
| 6  | -4.211294000 | 2.258230000  | 0.017590000  |
| 1  | -4.488909000 | 2.538010000  | 1.036290000  |
| 1  | -4.282420000 | 3.145968000  | -0.603040000 |
| 1  | -4.897034000 | 1.500184000  | -0.352583000 |
| 6  | -1.823748000 | 2.771942000  | -0.095274000 |
| 8  | -2.229756000 | 3.907940000  | -0.007461000 |
| 31 | 0.214322000  | 0.645448000  | -0.448955000 |

**$^{13}\text{GaTS}^{\text{B-H}}$  (T.E = -3937.052055)**

|    |              |              |              |
|----|--------------|--------------|--------------|
| 7  | -1.735702000 | 0.413545000  | 0.275853000  |
| 6  | -2.764886000 | 1.271601000  | -0.207892000 |
| 6  | -2.584584000 | 2.631090000  | -0.447445000 |
| 1  | -3.431436000 | 3.210045000  | -0.799181000 |
| 6  | -1.363422000 | 3.281466000  | -0.323495000 |
| 6  | 2.326831000  | -2.610267000 | -0.461894000 |
| 6  | 3.520586000  | -1.683342000 | -0.093681000 |
| 8  | 1.222813000  | -1.922623000 | 0.139206000  |
| 8  | 2.922955000  | -0.385123000 | -0.081303000 |
| 5  | 1.556403000  | -0.560855000 | 0.113153000  |
| 6  | 4.056850000  | -1.945172000 | 1.303685000  |
| 1  | 4.606103000  | -2.887974000 | 1.362814000  |
| 1  | 4.737933000  | -1.134631000 | 1.569820000  |
| 1  | 3.248147000  | -1.960333000 | 2.037229000  |
| 6  | 4.657112000  | -1.694544000 | -1.089149000 |
| 1  | 5.451716000  | -1.029801000 | -0.743848000 |
| 1  | 5.076699000  | -2.699993000 | -1.189483000 |
| 1  | 4.332566000  | -1.349767000 | -2.070703000 |
| 6  | 2.075131000  | -2.682374000 | -1.958143000 |
| 1  | 2.860653000  | -3.235455000 | -2.477488000 |
| 1  | 1.126895000  | -3.199120000 | -2.128938000 |
| 1  | 1.996133000  | -1.683522000 | -2.394142000 |
| 6  | 2.404031000  | -4.004416000 | 0.113547000  |
| 1  | 1.532494000  | -4.582327000 | -0.203459000 |
| 1  | 3.298748000  | -4.522674000 | -0.243378000 |
| 1  | 2.419845000  | -3.988603000 | 1.203057000  |
| 1  | 0.771889000  | 0.118394000  | -1.261151000 |
| 31 | 0.122589000  | 0.795993000  | 0.325304000  |



|    |              |              |              |
|----|--------------|--------------|--------------|
| 15 | 0.591008000  | 4.112549000  | -0.063311000 |
| 15 | -2.781285000 | -0.850923000 | 0.059251000  |
| 6  | -3.856740000 | 0.404216000  | -0.405045000 |
| 7  | -2.305334000 | -1.963116000 | -1.056715000 |
| 7  | -3.026287000 | -1.746763000 | 1.437116000  |
| 6  | -1.792951000 | -1.437539000 | -2.312624000 |
| 1  | -2.155402000 | -0.420674000 | -2.473132000 |
| 1  | -0.697526000 | -1.409562000 | -2.316895000 |
| 1  | -2.144910000 | -2.063114000 | -3.138241000 |
| 6  | -1.956599000 | -3.344304000 | -0.806648000 |
| 1  | -2.502069000 | -3.726104000 | 0.054178000  |
| 1  | -2.231429000 | -3.943465000 | -1.679857000 |
| 1  | -0.878160000 | -3.459902000 | -0.630289000 |
| 6  | -4.068189000 | -1.281515000 | 2.335029000  |
| 1  | -4.287897000 | -2.068920000 | 3.060894000  |
| 1  | -3.764668000 | -0.379323000 | 2.884633000  |
| 1  | -4.980089000 | -1.057184000 | 1.782444000  |
| 6  | -1.808112000 | -2.125766000 | 2.147346000  |
| 1  | -0.974267000 | -2.293723000 | 1.460836000  |
| 1  | -1.502432000 | -1.334601000 | 2.844129000  |
| 1  | -1.979180000 | -3.046218000 | 2.713155000  |
| 6  | -5.233244000 | 0.614494000  | -0.905269000 |
| 1  | -5.579761000 | -0.234725000 | -1.500701000 |
| 1  | -5.973585000 | 0.772039000  | -0.110758000 |
| 1  | -5.273985000 | 1.493017000  | -1.556111000 |
| 7  | -0.150947000 | 2.657636000  | 0.127836000  |
| 6  | -0.970072000 | 4.606852000  | -0.582838000 |
| 6  | -1.739475000 | 5.801135000  | -0.998707000 |
| 1  | -2.395267000 | 5.579469000  | -1.847049000 |
| 1  | -2.377370000 | 6.206208000  | -0.201819000 |
| 1  | -1.077319000 | 6.608869000  | -1.317934000 |
| 7  | 1.938238000  | 3.957952000  | -1.003431000 |
| 7  | 1.198356000  | 4.824874000  | 1.306905000  |
| 6  | 2.994933000  | 4.943050000  | -1.080810000 |
| 1  | 2.926871000  | 5.522024000  | -2.009860000 |
| 1  | 2.946380000  | 5.631573000  | -0.239511000 |
| 1  | 3.969681000  | 4.443474000  | -1.067925000 |
| 6  | 2.231047000  | 4.102854000  | 2.037112000  |
| 1  | 2.851833000  | 4.806418000  | 2.599302000  |
| 1  | 1.785214000  | 3.390155000  | 2.743312000  |
| 1  | 2.870267000  | 3.541969000  | 1.355338000  |
| 6  | 0.246900000  | 5.473521000  | 2.192225000  |
| 1  | 0.789952000  | 6.125729000  | 2.881211000  |
| 1  | -0.457104000 | 6.078284000  | 1.623037000  |
| 1  | -0.322331000 | 4.743659000  | 2.783902000  |
| 6  | 1.897465000  | 3.062189000  | -2.147395000 |
| 1  | 2.813212000  | 2.464092000  | -2.180306000 |
| 1  | 1.057277000  | 2.371740000  | -2.075023000 |
| 1  | 1.812297000  | 3.628031000  | -3.082293000 |

Cartesian coordinates of the H–H splitting products obtained for some of the representative Al(I)/Ga(I) carbenoids and also their total energies (in hartrees) including the zero point vibrational correction that have been calculated at **M06-D3/Def2-TZVP** level of theory.

**1AIP<sup>H-H</sup>** (T.E = -932.079238)

|    |              |              |              |
|----|--------------|--------------|--------------|
| 7  | 1.430642000  | 0.494458000  | -0.303244000 |
| 6  | 1.229907000  | 1.768847000  | -0.570368000 |
| 6  | 0.000001000  | 2.386576000  | -0.745866000 |
| 7  | -1.430642000 | 0.494458000  | -0.303242000 |
| 1  | 0.000000000  | 3.436287000  | -1.002445000 |
| 1  | 2.116279000  | 2.397852000  | -0.668122000 |
| 6  | 2.742667000  | 0.050848000  | -0.025257000 |
| 6  | 3.132903000  | -1.209033000 | -0.468596000 |
| 6  | 3.639632000  | 0.818443000  | 0.711751000  |
| 6  | 4.404691000  | -1.679347000 | -0.200749000 |
| 1  | 2.437618000  | -1.807801000 | -1.049362000 |
| 6  | 4.912557000  | 0.344011000  | 0.969801000  |
| 1  | 3.325609000  | 1.775100000  | 1.113884000  |
| 6  | 5.302465000  | -0.904024000 | 0.513850000  |
| 1  | 4.696862000  | -2.659515000 | -0.558792000 |
| 1  | 5.599670000  | 0.949426000  | 1.549584000  |
| 1  | 6.297903000  | -1.275472000 | 0.725055000  |
| 6  | -2.742668000 | 0.050849000  | -0.025256000 |
| 6  | -3.132897000 | -1.209040000 | -0.468581000 |
| 6  | -3.639640000 | 0.818449000  | 0.711739000  |
| 6  | -4.404685000 | -1.679355000 | -0.200736000 |
| 1  | -2.437608000 | -1.807811000 | -1.049338000 |
| 6  | -4.912564000 | 0.344014000  | 0.969787000  |
| 1  | -3.325623000 | 1.775110000  | 1.113864000  |
| 6  | -5.302466000 | -0.904027000 | 0.513849000  |
| 1  | -4.696850000 | -2.659529000 | -0.558769000 |
| 1  | -5.599682000 | 0.949434000  | 1.549560000  |
| 1  | -6.297903000 | -1.275476000 | 0.725053000  |
| 6  | -1.229905000 | 1.768847000  | -0.570369000 |
| 1  | -2.116277000 | 2.397852000  | -0.668127000 |
| 13 | 0.000000000  | -0.806205000 | -0.248641000 |
| 1  | 0.000004000  | -1.555906000 | 1.143427000  |
| 1  | -0.000001000 | -1.677657000 | -1.577723000 |

**4AIP<sup>H-H</sup>** (T.E = -1144.858171)

|   |              |             |              |
|---|--------------|-------------|--------------|
| 7 | 1.233783000  | 0.501094000 | -0.268516000 |
| 6 | 0.951336000  | 1.796743000 | -0.427310000 |
| 6 | -0.288598000 | 2.387983000 | -0.487056000 |
| 6 | -1.519160000 | 1.723662000 | -0.308249000 |
| 6 | -1.687098000 | 0.373942000 | -0.156113000 |

|    |              |              |              |
|----|--------------|--------------|--------------|
| 6  | 2.574753000  | 0.126417000  | -0.072916000 |
| 6  | 3.011679000  | -1.102589000 | -0.565168000 |
| 6  | 3.479401000  | 0.919938000  | 0.632024000  |
| 6  | 4.317554000  | -1.513165000 | -0.377871000 |
| 1  | 2.318178000  | -1.725792000 | -1.122388000 |
| 6  | 4.787101000  | 0.506241000  | 0.808464000  |
| 1  | 3.145191000  | 1.851299000  | 1.074718000  |
| 6  | 5.216646000  | -0.709738000 | 0.304118000  |
| 1  | 4.636680000  | -2.469659000 | -0.775930000 |
| 1  | 5.473241000  | 1.135713000  | 1.364126000  |
| 1  | 6.240131000  | -1.033252000 | 0.450972000  |
| 1  | 1.809312000  | 2.462786000  | -0.529919000 |
| 15 | -3.221631000 | -0.296965000 | 0.161060000  |
| 6  | -4.635464000 | 0.815081000  | 0.014645000  |
| 1  | -5.557358000 | 0.270436000  | 0.224796000  |
| 1  | -4.540300000 | 1.636431000  | 0.725862000  |
| 1  | -4.682795000 | 1.225595000  | -0.994622000 |
| 6  | -3.555694000 | -1.684414000 | -0.936344000 |
| 1  | -3.553180000 | -1.338572000 | -1.970558000 |
| 1  | -2.756770000 | -2.421117000 | -0.825968000 |
| 1  | -4.514001000 | -2.150080000 | -0.699638000 |
| 6  | -3.318050000 | -0.998361000 | 1.818549000  |
| 1  | -3.243544000 | -0.195686000 | 2.553122000  |
| 1  | -4.250215000 | -1.547654000 | 1.964378000  |
| 1  | -2.466446000 | -1.668782000 | 1.954424000  |
| 1  | -2.387565000 | 2.390641000  | -0.288360000 |
| 1  | -0.305178000 | 3.459101000  | -0.643793000 |
| 13 | -0.119333000 | -0.867485000 | -0.292113000 |
| 1  | -0.008940000 | -1.823379000 | 0.991377000  |
| 1  | -0.123555000 | -1.684339000 | -1.672039000 |

**6AIP<sup>H-H</sup>** (T.E = -1275.439206)

|    |              |              |              |
|----|--------------|--------------|--------------|
| 6  | -1.502812000 | 1.248032000  | -0.105410000 |
| 6  | -1.480924000 | -0.144756000 | -0.025450000 |
| 6  | 1.011275000  | 1.430136000  | -0.218159000 |
| 1  | 1.811573000  | 2.171397000  | -0.277761000 |
| 13 | 0.084220000  | -1.313501000 | -0.122450000 |
| 7  | 1.357887000  | 0.180990000  | -0.146543000 |
| 15 | -3.059712000 | -0.765792000 | 0.133502000  |
| 6  | -3.958391000 | -0.257307000 | 1.615573000  |
| 1  | -4.040523000 | 0.829303000  | 1.612272000  |
| 1  | -4.953984000 | -0.705174000 | 1.639259000  |
| 1  | -3.395556000 | -0.572038000 | 2.495181000  |
| 6  | -4.186310000 | -0.408952000 | -1.232744000 |
| 1  | -3.766509000 | -0.818177000 | -2.152513000 |
| 1  | -5.168609000 | -0.850104000 | -1.051490000 |
| 1  | -4.276769000 | 0.672567000  | -1.330128000 |
| 6  | -2.986624000 | -2.562326000 | 0.221692000  |

|   |              |              |              |
|---|--------------|--------------|--------------|
| 1 | -2.378516000 | -2.863852000 | 1.076736000  |
| 1 | -3.989324000 | -2.979781000 | 0.325888000  |
| 1 | -2.526784000 | -2.955104000 | -0.687555000 |
| 8 | -2.472445000 | 2.007710000  | -0.079256000 |
| 7 | -0.210287000 | 1.954976000  | -0.241854000 |
| 6 | -0.327423000 | 3.399367000  | -0.380665000 |
| 1 | -0.905275000 | 3.650033000  | -1.269431000 |
| 1 | -0.844776000 | 3.823572000  | 0.478545000  |
| 1 | 0.667479000  | 3.834730000  | -0.461901000 |
| 6 | 2.743571000  | -0.100460000 | -0.028839000 |
| 6 | 3.279495000  | -1.150480000 | -0.764768000 |
| 6 | 3.562561000  | 0.619299000  | 0.833524000  |
| 6 | 4.624023000  | -1.452598000 | -0.659140000 |
| 1 | 2.629084000  | -1.716898000 | -1.423335000 |
| 6 | 4.909094000  | 0.314802000  | 0.928536000  |
| 1 | 3.134881000  | 1.395805000  | 1.458515000  |
| 6 | 5.445776000  | -0.718788000 | 0.181017000  |
| 1 | 5.033510000  | -2.269546000 | -1.241691000 |
| 1 | 5.537782000  | 0.879132000  | 1.607493000  |
| 1 | 6.498519000  | -0.961101000 | 0.263109000  |
| 1 | 0.422700000  | -2.177965000 | 1.178311000  |
| 1 | 0.258399000  | -2.133644000 | -1.488347000 |

**8AIP<sup>H-H</sup>** (T.E = -1509.492255)

|    |              |              |              |
|----|--------------|--------------|--------------|
| 7  | 1.408846000  | 0.431620000  | -1.131783000 |
| 6  | 1.057702000  | 1.528259000  | -0.298764000 |
| 6  | -0.059236000 | 2.383951000  | -0.690206000 |
| 15 | 2.349455000  | -0.068656000 | 0.134374000  |
| 6  | 1.802736000  | 1.432751000  | 0.846598000  |
| 6  | 1.870601000  | 2.243946000  | 2.081386000  |
| 1  | 2.848788000  | 2.708698000  | 2.235416000  |
| 1  | 1.132770000  | 3.049997000  | 2.036870000  |
| 1  | 1.651342000  | 1.658989000  | 2.980414000  |
| 7  | 1.937072000  | -1.409896000 | 0.983782000  |
| 7  | 3.886007000  | -0.366488000 | -0.371268000 |
| 6  | 2.201148000  | -2.746956000 | 0.466125000  |
| 1  | 1.301338000  | -3.157519000 | -0.002269000 |
| 1  | 2.989924000  | -2.724474000 | -0.283660000 |
| 1  | 2.511349000  | -3.399287000 | 1.288068000  |
| 6  | 0.769071000  | -1.375692000 | 1.853771000  |
| 1  | 0.921940000  | -2.071347000 | 2.683102000  |
| 1  | 0.615342000  | -0.375936000 | 2.256955000  |
| 1  | -0.138269000 | -1.670670000 | 1.312688000  |
| 6  | 4.906439000  | -0.847034000 | 0.539595000  |
| 1  | 5.521504000  | -1.603945000 | 0.042712000  |
| 1  | 5.565288000  | -0.031122000 | 0.859317000  |
| 1  | 4.457168000  | -1.295775000 | 1.424270000  |
| 6  | 4.419302000  | 0.334757000  | -1.526348000 |

|    |              |              |              |
|----|--------------|--------------|--------------|
| 1  | 3.609206000  | 0.643568000  | -2.183582000 |
| 1  | 4.993146000  | 1.219056000  | -1.224696000 |
| 1  | 5.086074000  | -0.334170000 | -2.077535000 |
| 13 | -0.069652000 | -0.464860000 | -1.978255000 |
| 6  | -2.353914000 | -0.744836000 | -0.337534000 |
| 6  | -2.696897000 | -0.788228000 | 1.018860000  |
| 6  | -2.919185000 | -1.712330000 | -1.172707000 |
| 6  | -3.574094000 | -1.738254000 | 1.507651000  |
| 1  | -2.260540000 | -0.051003000 | 1.687123000  |
| 6  | -3.788675000 | -2.667965000 | -0.679127000 |
| 1  | -2.676384000 | -1.694759000 | -2.231326000 |
| 6  | -4.127617000 | -2.688349000 | 0.663737000  |
| 1  | -3.822127000 | -1.740761000 | 2.563791000  |
| 1  | -4.210763000 | -3.402578000 | -1.356095000 |
| 1  | -4.811883000 | -3.435017000 | 1.048339000  |
| 7  | -1.437719000 | 0.186505000  | -0.830797000 |
| 5  | -1.448644000 | 1.564259000  | -0.476077000 |
| 7  | -2.591382000 | 2.291723000  | -0.027111000 |
| 6  | -3.950128000 | 1.852002000  | -0.245790000 |
| 1  | -3.987492000 | 1.007311000  | -0.930138000 |
| 1  | -4.445288000 | 1.554167000  | 0.688399000  |
| 1  | -4.536143000 | 2.669487000  | -0.683946000 |
| 6  | -2.566796000 | 3.555284000  | 0.663417000  |
| 1  | -1.558867000 | 3.836199000  | 0.964357000  |
| 1  | -2.982116000 | 4.367250000  | 0.050629000  |
| 1  | -3.173600000 | 3.501242000  | 1.576843000  |
| 1  | -0.036703000 | 3.333567000  | -0.158110000 |
| 1  | 0.011375000  | 2.599883000  | -1.763947000 |
| 1  | 0.188580000  | -2.027237000 | -1.750713000 |
| 1  | -0.220581000 | 0.055818000  | -3.474923000 |

**10AIP<sup>H-H</sup>** (T.E = -1600.982747)

|    |              |              |              |
|----|--------------|--------------|--------------|
| 7  | 0.577962000  | -0.068589000 | -0.156208000 |
| 6  | 0.569116000  | 1.360169000  | -0.261880000 |
| 6  | -0.594264000 | 2.120735000  | -0.270779000 |
| 6  | -1.883046000 | 1.592912000  | -0.170107000 |
| 1  | -0.475984000 | 3.193211000  | -0.380460000 |
| 1  | -2.666852000 | 2.353693000  | -0.260109000 |
| 15 | 2.215482000  | 0.043362000  | -0.073322000 |
| 6  | 1.930561000  | 1.715899000  | -0.317873000 |
| 6  | 2.607960000  | 3.031853000  | -0.331745000 |
| 1  | 2.370970000  | 3.615604000  | -1.227991000 |
| 1  | 2.337171000  | 3.653576000  | 0.532124000  |
| 1  | 3.693954000  | 2.915369000  | -0.311298000 |
| 6  | -2.258738000 | 0.274683000  | 0.034729000  |
| 15 | -3.885836000 | -0.178656000 | -0.001717000 |
| 6  | -5.106537000 | 1.151667000  | 0.107653000  |
| 1  | -6.114116000 | 0.732538000  | 0.100687000  |

|    |              |              |              |
|----|--------------|--------------|--------------|
| 1  | -4.956755000 | 1.717431000  | 1.027841000  |
| 1  | -5.000760000 | 1.827448000  | -0.741829000 |
| 6  | -4.285012000 | -1.321057000 | 1.336170000  |
| 1  | -5.324270000 | -1.650330000 | 1.278239000  |
| 1  | -3.627710000 | -2.190597000 | 1.263882000  |
| 1  | -4.098014000 | -0.836419000 | 2.294874000  |
| 6  | -4.347399000 | -1.101571000 | -1.488203000 |
| 1  | -4.255343000 | -0.448154000 | -2.356742000 |
| 1  | -3.642968000 | -1.928066000 | -1.604293000 |
| 1  | -5.366370000 | -1.489771000 | -1.424638000 |
| 7  | 2.931813000  | -0.385278000 | 1.361984000  |
| 7  | 2.926504000  | -1.003010000 | -1.144637000 |
| 6  | 2.845120000  | -1.778100000 | 1.784213000  |
| 1  | 1.884695000  | -1.981339000 | 2.276329000  |
| 1  | 2.936977000  | -2.445707000 | 0.928691000  |
| 1  | 3.653717000  | -1.998318000 | 2.486971000  |
| 6  | 2.744472000  | 0.532287000  | 2.474778000  |
| 1  | 3.467569000  | 0.291930000  | 3.258475000  |
| 1  | 2.904518000  | 1.560709000  | 2.154743000  |
| 1  | 1.734366000  | 0.452357000  | 2.899562000  |
| 6  | 4.365403000  | -1.162984000 | -1.194762000 |
| 1  | 4.611941000  | -2.188026000 | -1.489277000 |
| 1  | 4.821044000  | -0.483761000 | -1.927415000 |
| 1  | 4.808941000  | -0.967603000 | -0.219566000 |
| 6  | 2.284418000  | -1.188453000 | -2.434154000 |
| 1  | 1.202161000  | -1.133356000 | -2.327169000 |
| 1  | 2.610776000  | -0.433453000 | -3.161061000 |
| 1  | 2.545230000  | -2.176303000 | -2.823427000 |
| 13 | -0.880747000 | -1.156698000 | 0.290551000  |
| 1  | -1.068308000 | -2.380759000 | -0.745471000 |
| 1  | -0.767847000 | -1.685515000 | 1.810535000  |

**11AIP<sup>H-H</sup> (T.E = -1518.791166)**

|    |              |              |              |
|----|--------------|--------------|--------------|
| 7  | -0.749195000 | -0.199775000 | 0.276328000  |
| 6  | -0.819953000 | 1.179819000  | 0.017828000  |
| 6  | 1.676170000  | 1.510390000  | -0.029126000 |
| 15 | -2.393893000 | -0.219411000 | 0.120955000  |
| 6  | -2.183601000 | 1.487423000  | -0.067134000 |
| 6  | -3.051052000 | 2.666501000  | -0.329064000 |
| 1  | -3.037196000 | 3.408633000  | 0.473987000  |
| 1  | -2.805370000 | 3.187062000  | -1.259424000 |
| 1  | -4.088503000 | 2.335675000  | -0.424590000 |
| 7  | -3.043943000 | -0.991302000 | -1.179105000 |
| 7  | -3.063791000 | -0.992655000 | 1.407984000  |
| 6  | -2.951182000 | -2.445137000 | -1.262443000 |
| 1  | -2.027477000 | -2.743787000 | -1.772897000 |
| 1  | -2.954736000 | -2.890362000 | -0.268590000 |
| 1  | -3.805290000 | -2.834722000 | -1.822623000 |

|    |              |              |              |
|----|--------------|--------------|--------------|
| 6  | -2.944848000 | -0.354069000 | -2.485084000 |
| 1  | -3.700090000 | -0.786865000 | -3.145527000 |
| 1  | -3.124358000 | 0.716542000  | -2.405889000 |
| 1  | -1.956334000 | -0.514631000 | -2.932729000 |
| 6  | -4.491446000 | -1.233517000 | 1.492610000  |
| 1  | -4.673750000 | -2.222446000 | 1.924248000  |
| 1  | -4.981868000 | -0.489282000 | 2.131062000  |
| 1  | -4.948452000 | -1.199449000 | 0.504688000  |
| 6  | -2.398983000 | -0.952953000 | 2.700614000  |
| 1  | -1.321520000 | -0.875907000 | 2.568558000  |
| 1  | -2.749624000 | -0.109633000 | 3.307042000  |
| 1  | -2.618016000 | -1.878300000 | 3.239437000  |
| 7  | 0.277606000  | 1.939596000  | -0.111880000 |
| 6  | 0.060227000  | 3.366751000  | -0.302566000 |
| 1  | -0.392825000 | 3.561348000  | -1.276262000 |
| 1  | -0.586550000 | 3.762880000  | 0.480816000  |
| 1  | 1.025859000  | 3.858690000  | -0.249081000 |
| 8  | 2.499354000  | 2.390574000  | 0.070271000  |
| 7  | 1.909668000  | 0.189456000  | -0.114789000 |
| 6  | 3.266868000  | -0.222916000 | -0.022520000 |
| 6  | 4.098478000  | 0.167088000  | 1.022124000  |
| 6  | 3.748706000  | -1.119311000 | -0.968733000 |
| 6  | 5.384764000  | -0.328534000 | 1.106775000  |
| 1  | 3.729419000  | 0.864777000  | 1.762762000  |
| 6  | 5.036410000  | -1.620863000 | -0.874083000 |
| 1  | 3.105374000  | -1.412134000 | -1.793617000 |
| 6  | 5.861442000  | -1.225211000 | 0.162079000  |
| 1  | 6.023077000  | -0.014620000 | 1.925046000  |
| 1  | 5.394719000  | -2.319374000 | -1.621552000 |
| 1  | 6.870945000  | -1.612055000 | 0.236507000  |
| 13 | 0.697447000  | -1.259269000 | -0.292874000 |
| 1  | 0.438101000  | -1.696043000 | -1.814471000 |
| 1  | 0.966816000  | -2.428926000 | 0.746538000  |

**13AIP<sup>H-H</sup> (T.E = -1844.338563)**

|    |              |              |              |
|----|--------------|--------------|--------------|
| 7  | -1.361382000 | -0.220381000 | 0.096947000  |
| 6  | -1.221411000 | 1.208045000  | 0.059431000  |
| 6  | 0.000003000  | 1.865691000  | 0.001111000  |
| 6  | 1.221403000  | 1.208105000  | -0.058158000 |
| 1  | 0.000020000  | 2.950446000  | 0.001993000  |
| 13 | 0.000016000  | -1.503062000 | -0.000666000 |
| 15 | -2.982578000 | 0.030653000  | 0.037967000  |
| 6  | -2.543684000 | 1.686703000  | 0.075951000  |
| 6  | -3.101216000 | 3.052001000  | -0.053104000 |
| 1  | -2.807294000 | 3.705212000  | 0.775622000  |
| 1  | -2.782446000 | 3.549638000  | -0.978376000 |
| 1  | -4.193332000 | 3.030752000  | -0.063717000 |
| 7  | 1.361342000  | -0.220268000 | -0.097893000 |

|    |              |              |              |
|----|--------------|--------------|--------------|
| 6  | 2.543694000  | 1.686755000  | -0.073730000 |
| 15 | 2.982527000  | 0.030642000  | -0.038040000 |
| 6  | 3.101252000  | 3.051834000  | 0.057509000  |
| 1  | 2.806859000  | 3.706492000  | -0.769904000 |
| 1  | 2.782974000  | 3.547841000  | 0.983829000  |
| 1  | 4.193374000  | 3.030600000  | 0.067481000  |
| 7  | 3.786412000  | -0.504505000 | 1.312642000  |
| 7  | 3.748077000  | -0.799704000 | -1.252475000 |
| 6  | 3.838406000  | -1.941160000 | 1.552817000  |
| 1  | 2.908843000  | -2.298318000 | 2.015972000  |
| 1  | 3.983495000  | -2.482991000 | 0.619485000  |
| 1  | 4.672043000  | -2.169773000 | 2.222417000  |
| 6  | 3.546423000  | 0.242134000  | 2.537453000  |
| 1  | 2.562332000  | 0.008941000  | 2.967360000  |
| 1  | 4.313257000  | -0.021405000 | 3.270232000  |
| 1  | 3.595901000  | 1.313629000  | 2.349832000  |
| 6  | 3.092638000  | -0.839863000 | -2.549356000 |
| 1  | 3.444140000  | -1.717683000 | -3.097610000 |
| 1  | 2.013464000  | -0.919839000 | -2.427559000 |
| 1  | 3.320145000  | 0.053894000  | -3.144741000 |
| 6  | 5.194668000  | -0.799408000 | -1.351628000 |
| 1  | 5.555754000  | 0.032100000  | -1.971470000 |
| 1  | 5.649319000  | -0.717907000 | -0.365621000 |
| 1  | 5.530566000  | -1.732710000 | -1.813752000 |
| 7  | -3.747766000 | -0.801438000 | 1.251419000  |
| 7  | -3.786818000 | -0.502558000 | -1.313288000 |
| 6  | -5.194339000 | -0.802076000 | 1.350768000  |
| 1  | -5.529700000 | -1.736397000 | 1.811229000  |
| 1  | -5.555752000 | 0.028103000  | 1.972192000  |
| 1  | -5.649174000 | -0.718985000 | 0.364983000  |
| 6  | -3.092114000 | -0.843205000 | 2.548138000  |
| 1  | -2.012917000 | -0.922506000 | 2.426077000  |
| 1  | -3.319958000 | 0.049563000  | 3.144872000  |
| 1  | -3.443107000 | -1.722002000 | 3.095154000  |
| 6  | -3.547227000 | 0.245987000  | -2.537018000 |
| 1  | -4.314031000 | -0.016771000 | -3.270107000 |
| 1  | -3.597106000 | 1.317186000  | -2.347820000 |
| 1  | -2.563087000 | 0.013814000  | -2.967368000 |
| 6  | -3.838374000 | -1.938869000 | -1.555647000 |
| 1  | -3.983189000 | -2.482180000 | -0.623134000 |
| 1  | -4.672008000 | -2.166732000 | -2.225505000 |
| 1  | -2.908741000 | -2.295029000 | -2.019430000 |
| 1  | 0.098525000  | -2.375519000 | 1.343221000  |
| 1  | -0.098411000 | -2.375148000 | -1.344772000 |

**1GaP<sup>H-H</sup>** (T.E = -2614.436783)

|   |              |              |              |
|---|--------------|--------------|--------------|
| 7 | -0.581606000 | -0.294446000 | 1.464712000  |
| 7 | -0.581606000 | -0.294446000 | -1.464712000 |



|    |              |              |              |
|----|--------------|--------------|--------------|
| 6  | -1.843111000 | -0.583587000 | 1.236477000  |
| 6  | -1.843111000 | -0.583587000 | -1.236477000 |
| 6  | -2.443652000 | -0.779527000 | 0.000000000  |
| 1  | -3.488155000 | -1.057730000 | 0.000000000  |
| 6  | -0.160180000 | 0.012682000  | 2.772210000  |
| 6  | -0.966828000 | 0.716360000  | 3.663192000  |
| 6  | 1.116621000  | -0.368180000 | 3.175513000  |
| 6  | -0.514254000 | 0.999901000  | 4.938720000  |
| 6  | 1.564266000  | -0.076284000 | 4.449721000  |
| 6  | 0.750212000  | 0.603805000  | 5.340303000  |
| 1  | -1.151296000 | 1.553538000  | 5.618865000  |
| 1  | 2.558026000  | -0.387476000 | 4.749815000  |
| 1  | 1.104004000  | 0.834914000  | 6.337719000  |
| 6  | -0.160180000 | 0.012682000  | -2.772210000 |
| 6  | 1.116621000  | -0.368180000 | -3.175513000 |
| 6  | -0.966828000 | 0.716360000  | -3.663192000 |
| 6  | 1.564266000  | -0.076284000 | -4.449721000 |
| 6  | -0.514254000 | 0.999901000  | -4.938720000 |
| 6  | 0.750212000  | 0.603805000  | -5.340303000 |
| 1  | 2.558026000  | -0.387476000 | -4.749815000 |
| 1  | -1.151296000 | 1.553538000  | -5.618865000 |
| 1  | 1.104004000  | 0.834914000  | -6.337719000 |
| 1  | -1.938674000 | 1.073863000  | -3.342262000 |
| 1  | 1.749062000  | -0.920708000 | -2.487834000 |
| 1  | 1.749062000  | -0.920708000 | 2.487834000  |
| 1  | -1.938674000 | 1.073863000  | 3.342262000  |
| 31 | 0.781016000  | -0.265587000 | 0.000000000  |
| 1  | -2.488607000 | -0.683747000 | -2.111381000 |
| 1  | -2.488607000 | -0.683747000 | 2.111381000  |
| 1  | 1.558935000  | -1.634851000 | 0.000000000  |
| 1  | 1.496374000  | 1.128062000  | 0.000000000  |

**4GaP<sup>H-H</sup> (T.E = -2827.221870)**

|   |              |              |              |
|---|--------------|--------------|--------------|
| 7 | 1.280790000  | 0.602179000  | -0.251887000 |
| 6 | 0.987140000  | 1.883453000  | -0.442464000 |
| 6 | -0.257743000 | 2.471853000  | -0.517337000 |
| 6 | -1.490306000 | 1.824351000  | -0.316920000 |
| 6 | -1.685798000 | 0.483169000  | -0.131484000 |
| 6 | 2.615929000  | 0.229019000  | -0.043520000 |
| 6 | 3.046651000  | -1.024670000 | -0.476421000 |
| 6 | 3.529777000  | 1.052583000  | 0.615554000  |
| 6 | 4.353442000  | -1.427903000 | -0.282226000 |
| 1 | 2.344968000  | -1.674135000 | -0.989883000 |
| 6 | 4.837816000  | 0.644225000  | 0.801465000  |
| 1 | 3.202592000  | 2.004954000  | 1.016650000  |
| 6 | 5.261053000  | -0.595191000 | 0.352196000  |
| 1 | 4.666582000  | -2.403947000 | -0.635319000 |
| 1 | 5.529310000  | 1.297678000  | 1.321803000  |

|    |              |              |              |
|----|--------------|--------------|--------------|
| 1  | 6.284861000  | -0.914306000 | 0.506320000  |
| 1  | 1.839600000  | 2.555207000  | -0.560786000 |
| 15 | -3.222557000 | -0.165591000 | 0.203038000  |
| 6  | -4.617992000 | 0.968451000  | 0.052256000  |
| 1  | -5.547505000 | 0.442663000  | 0.276356000  |
| 1  | -4.502743000 | 1.797112000  | 0.751864000  |
| 1  | -4.665750000 | 1.366392000  | -0.961961000 |
| 6  | -3.587650000 | -1.561521000 | -0.874624000 |
| 1  | -3.587895000 | -1.228544000 | -1.913039000 |
| 1  | -2.800558000 | -2.309889000 | -0.759695000 |
| 1  | -4.551515000 | -2.008636000 | -0.624997000 |
| 6  | -3.324088000 | -0.849330000 | 1.868433000  |
| 1  | -3.235201000 | -0.040649000 | 2.594715000  |
| 1  | -4.263613000 | -1.383562000 | 2.022860000  |
| 1  | -2.483439000 | -1.531946000 | 2.010109000  |
| 1  | -2.351887000 | 2.499885000  | -0.308547000 |
| 1  | -0.271178000 | 3.538795000  | -0.700810000 |
| 31 | -0.134695000 | -0.807327000 | -0.239156000 |
| 1  | 0.042445000  | -1.692904000 | 1.070816000  |
| 1  | -0.110093000 | -1.609354000 | -1.614437000 |

**6GaP<sup>H-H</sup>** (T.E = -2957.802878)

|    |              |              |              |
|----|--------------|--------------|--------------|
| 6  | -1.498682000 | 1.384558000  | -0.106376000 |
| 6  | -1.501739000 | -0.006163000 | -0.013706000 |
| 6  | 1.018014000  | 1.570880000  | -0.230066000 |
| 1  | 1.808224000  | 2.323843000  | -0.289805000 |
| 7  | 1.379136000  | 0.332064000  | -0.144465000 |
| 15 | -3.085499000 | -0.602783000 | 0.176708000  |
| 6  | -3.955642000 | -0.070249000 | 1.667555000  |
| 1  | -4.023174000 | 1.017200000  | 1.655580000  |
| 1  | -4.956706000 | -0.504503000 | 1.708880000  |
| 1  | -3.384709000 | -0.384990000 | 2.541863000  |
| 6  | -4.230714000 | -0.245206000 | -1.174248000 |
| 1  | -3.832592000 | -0.669907000 | -2.096624000 |
| 1  | -5.215684000 | -0.670757000 | -0.971263000 |
| 1  | -4.307790000 | 0.836319000  | -1.281618000 |
| 6  | -3.033374000 | -2.399303000 | 0.279980000  |
| 1  | -2.418935000 | -2.700992000 | 1.130064000  |
| 1  | -4.039985000 | -2.803001000 | 0.399677000  |
| 1  | -2.589712000 | -2.805646000 | -0.631218000 |
| 8  | -2.469634000 | 2.145246000  | -0.067024000 |
| 7  | -0.212484000 | 2.084787000  | -0.270728000 |
| 6  | -0.335660000 | 3.526442000  | -0.435401000 |
| 1  | -0.933045000 | 3.758286000  | -1.316249000 |
| 1  | -0.833529000 | 3.969970000  | 0.425773000  |
| 1  | 0.656664000  | 3.960293000  | -0.549216000 |
| 6  | 2.758420000  | 0.055103000  | -0.005008000 |
| 6  | 3.302961000  | -1.014915000 | -0.706067000 |

|    |             |              |              |
|----|-------------|--------------|--------------|
| 6  | 3.571841000 | 0.799767000  | 0.842398000  |
| 6  | 4.647067000 | -1.310553000 | -0.584415000 |
| 1  | 2.658837000 | -1.601290000 | -1.352640000 |
| 6  | 4.918158000 | 0.499814000  | 0.955863000  |
| 1  | 3.139321000 | 1.592757000  | 1.442803000  |
| 6  | 5.462356000 | -0.552513000 | 0.240994000  |
| 1  | 5.061861000 | -2.142652000 | -1.141308000 |
| 1  | 5.540740000 | 1.083613000  | 1.624003000  |
| 1  | 6.514769000 | -0.790925000 | 0.337462000  |
| 31 | 0.052058000 | -1.222554000 | -0.155043000 |
| 1  | 0.432316000 | -2.075508000 | 1.126680000  |
| 1  | 0.244292000 | -1.957117000 | -1.553616000 |

**8GaP<sup>H-H</sup>** (T.E = -3191.847799)

|    |              |              |              |
|----|--------------|--------------|--------------|
| 7  | 1.464331000  | 0.528372000  | -0.997028000 |
| 6  | 1.029666000  | 1.580138000  | -0.151967000 |
| 6  | -0.081593000 | 2.429429000  | -0.574848000 |
| 15 | 2.325727000  | 0.000881000  | 0.316609000  |
| 6  | 1.698334000  | 1.462505000  | 1.039993000  |
| 6  | 1.664129000  | 2.240418000  | 2.297923000  |
| 1  | 2.603501000  | 2.759790000  | 2.509859000  |
| 1  | 0.879231000  | 3.000393000  | 2.241511000  |
| 1  | 1.441832000  | 1.617246000  | 3.169961000  |
| 7  | 1.895726000  | -1.379598000 | 1.091697000  |
| 7  | 3.898502000  | -0.252049000 | -0.100567000 |
| 6  | 2.213387000  | -2.690638000 | 0.543314000  |
| 1  | 1.332165000  | -3.123558000 | 0.059371000  |
| 1  | 3.006527000  | -2.620150000 | -0.199175000 |
| 1  | 2.540720000  | -3.355576000 | 1.348836000  |
| 6  | 0.717498000  | -1.404966000 | 1.946443000  |
| 1  | 0.887520000  | -2.103363000 | 2.770598000  |
| 1  | 0.516296000  | -0.416783000 | 2.356500000  |
| 1  | -0.170260000 | -1.729449000 | 1.390942000  |
| 6  | 4.869747000  | -0.754424000 | 0.850627000  |
| 1  | 5.528017000  | -1.480148000 | 0.362336000  |
| 1  | 5.493314000  | 0.057227000  | 1.243832000  |
| 1  | 4.375972000  | -1.246753000 | 1.687021000  |
| 6  | 4.489309000  | 0.506615000  | -1.189151000 |
| 1  | 3.714734000  | 0.830047000  | -1.881363000 |
| 1  | 5.026820000  | 1.386316000  | -0.815341000 |
| 1  | 5.201877000  | -0.126597000 | -1.725327000 |
| 6  | -2.296846000 | -0.729670000 | -0.127079000 |
| 6  | -2.659044000 | -0.692017000 | 1.226743000  |
| 6  | -2.788952000 | -1.795679000 | -0.887275000 |
| 6  | -3.477209000 | -1.658031000 | 1.780590000  |
| 1  | -2.275650000 | 0.116798000  | 1.842762000  |
| 6  | -3.599381000 | -2.766475000 | -0.327113000 |
| 1  | -2.533478000 | -1.846887000 | -1.941198000 |

|    |              |              |              |
|----|--------------|--------------|--------------|
| 6  | -3.954248000 | -2.707523000 | 1.010398000  |
| 1  | -3.736862000 | -1.595508000 | 2.832152000  |
| 1  | -3.962979000 | -3.577195000 | -0.949123000 |
| 1  | -4.591604000 | -3.467123000 | 1.446669000  |
| 7  | -1.438000000 | 0.215991000  | -0.676516000 |
| 5  | -1.464981000 | 1.603479000  | -0.366014000 |
| 7  | -2.626161000 | 2.323720000  | 0.046008000  |
| 6  | -3.970519000 | 1.839422000  | -0.164239000 |
| 1  | -3.978205000 | 0.971387000  | -0.820051000 |
| 1  | -4.462312000 | 1.558031000  | 0.776887000  |
| 1  | -4.577192000 | 2.624868000  | -0.631782000 |
| 6  | -2.638375000 | 3.608643000  | 0.695649000  |
| 1  | -1.638082000 | 3.931700000  | 0.978793000  |
| 1  | -3.083156000 | 4.385763000  | 0.059060000  |
| 1  | -3.237898000 | 3.565949000  | 1.614695000  |
| 1  | -0.073213000 | 3.381311000  | -0.045763000 |
| 1  | 0.009352000  | 2.639826000  | -1.647446000 |
| 31 | -0.047618000 | -0.427821000 | -1.912094000 |
| 1  | 0.221889000  | -1.971834000 | -1.697931000 |
| 1  | -0.199899000 | 0.204561000  | -3.346606000 |

**10GaP<sup>H-H</sup>** (T.E = -3283.343597)

|    |              |              |              |
|----|--------------|--------------|--------------|
| 7  | 0.680151000  | 0.052316000  | -0.297821000 |
| 6  | 0.680539000  | 1.479366000  | -0.215047000 |
| 6  | -0.475843000 | 2.252581000  | -0.154592000 |
| 6  | -1.772792000 | 1.742023000  | -0.112937000 |
| 1  | -0.341389000 | 3.328833000  | -0.159982000 |
| 1  | -2.544921000 | 2.517722000  | -0.162464000 |
| 15 | 2.308320000  | 0.135488000  | -0.104622000 |
| 6  | 2.043899000  | 1.829307000  | -0.187595000 |
| 6  | 2.729049000  | 3.132002000  | -0.029341000 |
| 1  | 2.620699000  | 3.780840000  | -0.905730000 |
| 1  | 2.349744000  | 3.696738000  | 0.832503000  |
| 1  | 3.801567000  | 2.994584000  | 0.128277000  |
| 6  | -2.180800000 | 0.424339000  | 0.000555000  |
| 15 | -3.808675000 | -0.013456000 | -0.073916000 |
| 6  | -5.010960000 | 1.332293000  | 0.039349000  |
| 1  | -6.024073000 | 0.928187000  | 0.005505000  |
| 1  | -4.870931000 | 1.877445000  | 0.973374000  |
| 1  | -4.878694000 | 2.022615000  | -0.794528000 |
| 6  | -4.247831000 | -1.176433000 | 1.234596000  |
| 1  | -5.290291000 | -1.490246000 | 1.152620000  |
| 1  | -3.601552000 | -2.053373000 | 1.154965000  |
| 1  | -4.071495000 | -0.712698000 | 2.205611000  |
| 6  | -4.255441000 | -0.904670000 | -1.584092000 |
| 1  | -4.143526000 | -0.237051000 | -2.439262000 |
| 1  | -3.558838000 | -1.737006000 | -1.704512000 |
| 1  | -5.278949000 | -1.283810000 | -1.542717000 |

|    |              |              |              |
|----|--------------|--------------|--------------|
| 31 | -0.831624000 | -1.061419000 | 0.231426000  |
| 7  | 2.947700000  | -0.427771000 | 1.321095000  |
| 7  | 3.076780000  | -0.812316000 | -1.226330000 |
| 6  | 2.863501000  | -1.853546000 | 1.609384000  |
| 1  | 1.900240000  | -2.104470000 | 2.072247000  |
| 1  | 2.963921000  | -2.437397000 | 0.695453000  |
| 1  | 3.667118000  | -2.137820000 | 2.295286000  |
| 6  | 2.717905000  | 0.382715000  | 2.506512000  |
| 1  | 3.413156000  | 0.070193000  | 3.290330000  |
| 1  | 2.886166000  | 1.436263000  | 2.289090000  |
| 1  | 1.693360000  | 0.264455000  | 2.884444000  |
| 6  | 4.512526000  | -0.996025000 | -1.213114000 |
| 1  | 4.759922000  | -2.007136000 | -1.553056000 |
| 1  | 5.015202000  | -0.284693000 | -1.881480000 |
| 1  | 4.908491000  | -0.863956000 | -0.207237000 |
| 6  | 2.495271000  | -0.905420000 | -2.552871000 |
| 1  | 1.411159000  | -0.822969000 | -2.491160000 |
| 1  | 2.876055000  | -0.119473000 | -3.217810000 |
| 1  | 2.749220000  | -1.875962000 | -2.988644000 |
| 1  | -1.006910000 | -2.266672000 | -0.804826000 |
| 1  | -0.645353000 | -1.526407000 | 1.754128000  |

**$^{11}\text{Ga}^{\text{H-H}}$**  (T.E = -3201.143583)

|    |              |              |              |
|----|--------------|--------------|--------------|
| 7  | 0.800297000  | -0.165064000 | -0.325732000 |
| 6  | 0.865137000  | 1.238813000  | -0.199727000 |
| 6  | -1.628691000 | 1.547196000  | -0.250053000 |
| 7  | -1.892923000 | 0.270116000  | 0.058102000  |
| 15 | 2.449836000  | -0.144968000 | -0.184662000 |
| 6  | 2.226502000  | 1.568146000  | -0.195227000 |
| 6  | 3.076848000  | 2.787103000  | -0.164308000 |
| 1  | 2.758791000  | 3.542608000  | -0.886085000 |
| 1  | 3.117465000  | 3.272377000  | 0.818193000  |
| 1  | 4.105382000  | 2.524975000  | -0.423624000 |
| 6  | -3.236065000 | -0.163752000 | -0.090334000 |
| 6  | -3.501121000 | -1.308406000 | -0.831806000 |
| 6  | -4.290611000 | 0.493395000  | 0.534619000  |
| 6  | -4.794209000 | -1.788507000 | -0.947394000 |
| 1  | -2.678335000 | -1.817691000 | -1.321089000 |
| 6  | -5.580785000 | 0.013005000  | 0.413909000  |
| 1  | -4.089085000 | 1.388872000  | 1.108776000  |
| 6  | -5.840314000 | -1.130034000 | -0.325667000 |
| 1  | -4.983060000 | -2.682149000 | -1.531479000 |
| 1  | -6.392985000 | 0.536411000  | 0.905782000  |
| 1  | -6.853439000 | -1.504019000 | -0.416510000 |
| 31 | -0.588204000 | -0.987545000 | 0.808908000  |
| 7  | 3.115110000  | -0.766454000 | 1.187251000  |
| 7  | 3.130351000  | -1.040965000 | -1.385074000 |
| 6  | 2.984306000  | -2.191097000 | 1.460479000  |

|   |              |              |              |
|---|--------------|--------------|--------------|
| 1 | 2.853368000  | -2.752159000 | 0.535594000  |
| 1 | 3.882523000  | -2.557362000 | 1.966109000  |
| 1 | 2.118629000  | -2.384030000 | 2.105658000  |
| 6 | 3.152446000  | 0.040799000  | 2.397083000  |
| 1 | 3.346004000  | 1.084170000  | 2.155058000  |
| 1 | 2.206758000  | -0.021269000 | 2.949379000  |
| 1 | 3.958161000  | -0.323867000 | 3.039818000  |
| 6 | 4.537251000  | -1.387165000 | -1.409742000 |
| 1 | 4.658120000  | -2.415746000 | -1.763877000 |
| 1 | 5.095464000  | -0.729521000 | -2.086638000 |
| 1 | 4.972200000  | -1.310681000 | -0.414853000 |
| 6 | 2.504185000  | -1.046182000 | -2.696793000 |
| 1 | 1.444416000  | -0.815391000 | -2.605709000 |
| 1 | 2.975331000  | -0.316253000 | -3.365162000 |
| 1 | 2.608926000  | -2.038816000 | -3.143054000 |
| 8 | -2.403340000 | 2.396205000  | -0.629591000 |
| 7 | -0.241138000 | 1.986420000  | -0.076084000 |
| 6 | -0.073307000 | 3.430757000  | -0.003672000 |
| 1 | 0.777892000  | 3.662323000  | 0.633439000  |
| 1 | 0.079433000  | 3.869824000  | -0.992271000 |
| 1 | -0.972251000 | 3.868033000  | 0.418603000  |
| 1 | -0.220183000 | -0.601151000 | 2.305036000  |
| 1 | -0.847347000 | -2.473521000 | 0.381949000  |

**$^{13}\text{GaP}^{\text{H-H}}$**  (T.E = -3526.689165)

|    |              |              |              |
|----|--------------|--------------|--------------|
| 7  | 1.387133000  | -0.085015000 | -0.480897000 |
| 6  | 1.227823000  | 1.328548000  | -0.271950000 |
| 6  | 0.000000000  | 1.973384000  | -0.186521000 |
| 6  | -1.227834000 | 1.328573000  | -0.272034000 |
| 1  | 0.000003000  | 3.041717000  | 0.004292000  |
| 15 | 2.978525000  | 0.152305000  | -0.127835000 |
| 6  | 2.540209000  | 1.808483000  | -0.113751000 |
| 6  | 3.062020000  | 3.160512000  | 0.188817000  |
| 1  | 2.820039000  | 3.884030000  | -0.596927000 |
| 1  | 2.661311000  | 3.566198000  | 1.127602000  |
| 1  | 4.149984000  | 3.151877000  | 0.284246000  |
| 7  | -1.387120000 | -0.084997000 | -0.480780000 |
| 6  | -2.540226000 | 1.808523000  | -0.113974000 |
| 15 | -2.978548000 | 0.152345000  | -0.127921000 |
| 6  | -3.062167000 | 3.160588000  | 0.188203000  |
| 1  | -2.659232000 | 3.567536000  | 1.125476000  |
| 1  | -2.822825000 | 3.883440000  | -0.598967000 |
| 1  | -4.149867000 | 3.151266000  | 0.286593000  |
| 7  | -3.944149000 | -0.608729000 | -1.237055000 |
| 7  | -3.538783000 | -0.469425000 | 1.307179000  |
| 6  | -3.527335000 | -0.574290000 | -2.627010000 |
| 1  | -3.984534000 | 0.267494000  | -3.161942000 |
| 1  | -2.443678000 | -0.485726000 | -2.687616000 |

|    |              |              |              |
|----|--------------|--------------|--------------|
| 1  | -3.831968000 | -1.501542000 | -3.121048000 |
| 6  | -5.374792000 | -0.747423000 | -1.068135000 |
| 1  | -5.919525000 | 0.043314000  | -1.599842000 |
| 1  | -5.704047000 | -1.710274000 | -1.472833000 |
| 1  | -5.644872000 | -0.704385000 | -0.014433000 |
| 6  | -3.531374000 | -1.914179000 | 1.487534000  |
| 1  | -4.317588000 | -2.204829000 | 2.190797000  |
| 1  | -3.708718000 | -2.422310000 | 0.540097000  |
| 1  | -2.566387000 | -2.255283000 | 1.885835000  |
| 6  | -3.173385000 | 0.238866000  | 2.523947000  |
| 1  | -2.134193000 | 0.034750000  | 2.815564000  |
| 1  | -3.290404000 | 1.313134000  | 2.391063000  |
| 1  | -3.830998000 | -0.087375000 | 3.334301000  |
| 7  | 3.944258000  | -0.608484000 | -1.237070000 |
| 7  | 3.538700000  | -0.469749000 | 1.307164000  |
| 6  | 5.374932000  | -0.746859000 | -1.068109000 |
| 1  | 5.704457000  | -1.709522000 | -1.473037000 |
| 1  | 5.919489000  | 0.044154000  | -1.599586000 |
| 1  | 5.644949000  | -0.704025000 | -0.014382000 |
| 6  | 3.527546000  | -0.573701000 | -2.627046000 |
| 1  | 2.443893000  | -0.485137000 | -2.687711000 |
| 1  | 3.984770000  | 0.268235000  | -3.161719000 |
| 1  | 3.832232000  | -1.500817000 | -3.121307000 |
| 6  | 3.173040000  | 0.238192000  | 2.524060000  |
| 1  | 3.830765000  | -0.087945000 | 3.334364000  |
| 1  | 3.289679000  | 1.312522000  | 2.391354000  |
| 1  | 2.133918000  | 0.033648000  | 2.815623000  |
| 6  | 3.531508000  | -1.914546000 | 1.487184000  |
| 1  | 3.709363000  | -2.422421000 | 0.539709000  |
| 1  | 4.317494000  | -2.205165000 | 2.190711000  |
| 1  | 2.566439000  | -2.255953000 | 1.885031000  |
| 31 | 0.000011000  | -1.307546000 | 0.140473000  |
| 1  | -0.000128000 | -2.671162000 | -0.650452000 |
| 1  | 0.000122000  | -1.348520000 | 1.743762000  |

Cartesian coordinates of the N–H splitting products obtained for some of the representative Al(I)/Ga(I) carbenoids and also their total energies (in hartrees) including the zero point vibrational correction that have been calculated at **M06-D3/Def2-TZVP** level of theory.

**1AIP<sup>N-H</sup>** (T.E = -987.452668)

|    |              |              |              |
|----|--------------|--------------|--------------|
| 7  | 1.423137000  | 0.600510000  | -0.315420000 |
| 6  | 1.227311000  | 1.895467000  | -0.461276000 |
| 6  | -0.000009000 | 2.532488000  | -0.564378000 |
| 7  | -1.423112000 | 0.600452000  | -0.315362000 |
| 1  | -0.000068000 | 3.601934000  | -0.718966000 |
| 1  | 2.117381000  | 2.524892000  | -0.514719000 |
| 6  | 2.749008000  | 0.142810000  | -0.119075000 |
| 6  | 3.166520000  | -1.019303000 | -0.758694000 |
| 6  | 3.631712000  | 0.809599000  | 0.723602000  |
| 6  | 4.452984000  | -1.489464000 | -0.575353000 |
| 1  | 2.474665000  | -1.541029000 | -1.411602000 |
| 6  | 4.919664000  | 0.336154000  | 0.898607000  |
| 1  | 3.294681000  | 1.684806000  | 1.268117000  |
| 6  | 5.337078000  | -0.812727000 | 0.249108000  |
| 1  | 4.768440000  | -2.391977000 | -1.085752000 |
| 1  | 5.596532000  | 0.862287000  | 1.561861000  |
| 1  | 6.344099000  | -1.185477000 | 0.392880000  |
| 6  | -2.748993000 | 0.142749000  | -0.119034000 |
| 6  | -3.166657000 | -1.019146000 | -0.758950000 |
| 6  | -3.631542000 | 0.809398000  | 0.723892000  |
| 6  | -4.453156000 | -1.489207000 | -0.575646000 |
| 1  | -2.474865000 | -1.540769000 | -1.412005000 |
| 6  | -4.919538000 | 0.336041000  | 0.898875000  |
| 1  | -3.294363000 | 1.684435000  | 1.268595000  |
| 6  | -5.337114000 | -0.812614000 | 0.249093000  |
| 1  | -4.768763000 | -2.391538000 | -1.086275000 |
| 1  | -5.596289000 | 0.862064000  | 1.562335000  |
| 1  | -6.344160000 | -1.185313000 | 0.392824000  |
| 6  | -1.227334000 | 1.895372000  | -0.461282000 |
| 1  | -2.117409000 | 2.524795000  | -0.514748000 |
| 13 | 0.000086000  | -0.707478000 | -0.226295000 |
| 1  | 0.000007000  | -1.658092000 | -1.494622000 |
| 7  | -0.000171000 | -1.557543000 | 1.339168000  |
| 1  | -0.000262000 | -1.143370000 | 2.255855000  |
| 1  | 0.000672000  | -2.560069000 | 1.422424000  |

**4AIP<sup>N-H</sup>** (T.E = -1200.233684)

|   |              |             |              |
|---|--------------|-------------|--------------|
| 7 | 1.232481000  | 0.644920000 | -0.262627000 |
| 6 | 0.956039000  | 1.952092000 | -0.238994000 |
| 6 | -0.281061000 | 2.550785000 | -0.217468000 |



|    |              |              |              |
|----|--------------|--------------|--------------|
| 6  | -1.512829000 | 1.869892000  | -0.141019000 |
| 6  | -1.676745000 | 0.510943000  | -0.156892000 |
| 6  | 2.578827000  | 0.253051000  | -0.131735000 |
| 6  | 3.037440000  | -0.855082000 | -0.842545000 |
| 6  | 3.465810000  | 0.912439000  | 0.717760000  |
| 6  | 4.348071000  | -1.275193000 | -0.721909000 |
| 1  | 2.352630000  | -1.371315000 | -1.508181000 |
| 6  | 4.778929000  | 0.491227000  | 0.827790000  |
| 1  | 3.112691000  | 1.742652000  | 1.319193000  |
| 6  | 5.229854000  | -0.602674000 | 0.109138000  |
| 1  | 4.686037000  | -2.134231000 | -1.290529000 |
| 1  | 5.451890000  | 1.015830000  | 1.496926000  |
| 1  | 6.257136000  | -0.934117000 | 0.202351000  |
| 1  | 1.817705000  | 2.621618000  | -0.250412000 |
| 15 | -3.224292000 | -0.190772000 | 0.033908000  |
| 6  | -4.624616000 | 0.946876000  | -0.041944000 |
| 1  | -5.556576000 | 0.391003000  | 0.072903000  |
| 1  | -4.552492000 | 1.683225000  | 0.759386000  |
| 1  | -4.632341000 | 1.467446000  | -1.000261000 |
| 6  | -3.522784000 | -1.436481000 | -1.230023000 |
| 1  | -3.483582000 | -0.972521000 | -2.216099000 |
| 1  | -2.730260000 | -2.185780000 | -1.173865000 |
| 1  | -4.490869000 | -1.918025000 | -1.081223000 |
| 6  | -3.382822000 | -1.078214000 | 1.591256000  |
| 1  | -3.323269000 | -0.369443000 | 2.418318000  |
| 1  | -4.326534000 | -1.625297000 | 1.640240000  |
| 1  | -2.532628000 | -1.766429000 | 1.653073000  |
| 1  | -2.383312000 | 2.529035000  | -0.056014000 |
| 1  | -0.294599000 | 3.633340000  | -0.230148000 |
| 13 | -0.122114000 | -0.724997000 | -0.360512000 |
| 1  | -0.084858000 | -1.516479000 | -1.752030000 |
| 7  | -0.107974000 | -1.929482000 | 1.006215000  |
| 1  | 0.357953000  | -2.815816000 | 0.872447000  |
| 1  | 0.070912000  | -1.634186000 | 1.956357000  |

**6AIP<sup>N-H</sup>** (T.E = -1330.814146)

|    |              |              |              |
|----|--------------|--------------|--------------|
| 6  | -1.522878000 | 1.382385000  | -0.064597000 |
| 6  | -1.497491000 | -0.007588000 | -0.186021000 |
| 6  | 0.989032000  | 1.577960000  | -0.178390000 |
| 1  | 1.789376000  | 2.321949000  | -0.164402000 |
| 13 | 0.058202000  | -1.175519000 | -0.286976000 |
| 7  | 1.334367000  | 0.327431000  | -0.228620000 |
| 15 | -3.062497000 | -0.670910000 | -0.023500000 |
| 6  | -3.806296000 | -0.457818000 | 1.608905000  |
| 1  | -3.854876000 | 0.608566000  | 1.829815000  |
| 1  | -4.807958000 | -0.890735000 | 1.648076000  |
| 1  | -3.166333000 | -0.950110000 | 2.343321000  |
| 6  | -4.303890000 | -0.064323000 | -1.186397000 |

|   |              |              |              |
|---|--------------|--------------|--------------|
| 1 | -3.963870000 | -0.266421000 | -2.202849000 |
| 1 | -5.260583000 | -0.562797000 | -1.017199000 |
| 1 | -4.412214000 | 1.011062000  | -1.051967000 |
| 6 | -3.005290000 | -2.449035000 | -0.283641000 |
| 1 | -2.289548000 | -2.890043000 | 0.415554000  |
| 1 | -3.995341000 | -2.883392000 | -0.135198000 |
| 1 | -2.666852000 | -2.657136000 | -1.300452000 |
| 8 | -2.486964000 | 2.129738000  | 0.105904000  |
| 7 | -0.232855000 | 2.102022000  | -0.146849000 |
| 6 | -0.351505000 | 3.552408000  | -0.127950000 |
| 1 | -0.955240000 | 3.893901000  | -0.967960000 |
| 1 | -0.843009000 | 3.883504000  | 0.785814000  |
| 1 | 0.641228000  | 3.995516000  | -0.193255000 |
| 6 | 2.720806000  | 0.041591000  | -0.130237000 |
| 6 | 3.286164000  | -0.877221000 | -1.006354000 |
| 6 | 3.511927000  | 0.629042000  | 0.849997000  |
| 6 | 4.632321000  | -1.178091000 | -0.916981000 |
| 1 | 2.655089000  | -1.344934000 | -1.753843000 |
| 6 | 4.860273000  | 0.326986000  | 0.929472000  |
| 1 | 3.058956000  | 1.300387000  | 1.571766000  |
| 6 | 5.426150000  | -0.574608000 | 0.045325000  |
| 1 | 5.065853000  | -1.890472000 | -1.609247000 |
| 1 | 5.467353000  | 0.788496000  | 1.699694000  |
| 1 | 6.480248000  | -0.815736000 | 0.112849000  |
| 1 | 0.352885000  | -1.991600000 | -1.627802000 |
| 7 | 0.214811000  | -2.253727000 | 1.157284000  |
| 1 | 0.794913000  | -3.078671000 | 1.157582000  |
| 1 | 0.136270000  | -1.914056000 | 2.104162000  |

**8AIP<sup>N-H</sup>** (T.E = -1564.865496)

|    |              |              |              |
|----|--------------|--------------|--------------|
| 7  | 1.343363000  | 0.240722000  | -1.068128000 |
| 6  | 1.081211000  | 1.490561000  | -0.446065000 |
| 6  | -0.018872000 | 2.310075000  | -0.948093000 |
| 15 | 2.396628000  | -0.027072000 | 0.175953000  |
| 6  | 1.901386000  | 1.585270000  | 0.646023000  |
| 6  | 2.095143000  | 2.612042000  | 1.692146000  |
| 1  | 3.113521000  | 3.011203000  | 1.715292000  |
| 1  | 1.421908000  | 3.455442000  | 1.515934000  |
| 1  | 1.878767000  | 2.233372000  | 2.696667000  |
| 7  | 2.110891000  | -1.188264000 | 1.297315000  |
| 7  | 3.901450000  | -0.372679000 | -0.397677000 |
| 6  | 2.441915000  | -2.588500000 | 1.052658000  |
| 1  | 1.597297000  | -3.094494000 | 0.573461000  |
| 1  | 3.303482000  | -2.670834000 | 0.393118000  |
| 1  | 2.680697000  | -3.065092000 | 2.007622000  |
| 6  | 0.932336000  | -1.041320000 | 2.140267000  |
| 1  | 1.111694000  | -1.538822000 | 3.096733000  |
| 1  | 0.718876000  | 0.011161000  | 2.326155000  |

|    |              |              |              |
|----|--------------|--------------|--------------|
| 1  | 0.052295000  | -1.494815000 | 1.667997000  |
| 6  | 5.013699000  | -0.518875000 | 0.522418000  |
| 1  | 5.695895000  | -1.293827000 | 0.159815000  |
| 1  | 5.579261000  | 0.417010000  | 0.611837000  |
| 1  | 4.663327000  | -0.806423000 | 1.512964000  |
| 6  | 4.297923000  | 0.105103000  | -1.710946000 |
| 1  | 3.433541000  | 0.155795000  | -2.369309000 |
| 1  | 4.759956000  | 1.098711000  | -1.653473000 |
| 1  | 5.028825000  | -0.587610000 | -2.136741000 |
| 13 | -0.158184000 | -0.719593000 | -1.781288000 |
| 6  | -2.500441000 | -0.615742000 | -0.245920000 |
| 6  | -2.709957000 | -0.637203000 | 1.135572000  |
| 6  | -3.270772000 | -1.477764000 | -1.030346000 |
| 6  | -3.661960000 | -1.465077000 | 1.703043000  |
| 1  | -2.112119000 | 0.022204000  | 1.758402000  |
| 6  | -4.216075000 | -2.311127000 | -0.460111000 |
| 1  | -3.118977000 | -1.472556000 | -2.105698000 |
| 6  | -4.422928000 | -2.309283000 | 0.910286000  |
| 1  | -3.806559000 | -1.454413000 | 2.778070000  |
| 1  | -4.801838000 | -2.966120000 | -1.095748000 |
| 1  | -5.166290000 | -2.959815000 | 1.355254000  |
| 7  | -1.513735000 | 0.196115000  | -0.818543000 |
| 5  | -1.429060000 | 1.592443000  | -0.576832000 |
| 7  | -2.495312000 | 2.418718000  | -0.103367000 |
| 6  | -3.892506000 | 2.064919000  | -0.198982000 |
| 1  | -4.039866000 | 1.195295000  | -0.835327000 |
| 1  | -4.334702000 | 1.845519000  | 0.782629000  |
| 1  | -4.455374000 | 2.900233000  | -0.634401000 |
| 6  | -2.336662000 | 3.710319000  | 0.513237000  |
| 1  | -1.293289000 | 3.932221000  | 0.731568000  |
| 1  | -2.738117000 | 4.519390000  | -0.113102000 |
| 1  | -2.879498000 | 3.745376000  | 1.467092000  |
| 1  | 0.052441000  | 3.335553000  | -0.589217000 |
| 1  | 0.028471000  | 2.334507000  | -2.044316000 |
| 1  | -0.181197000 | -0.494442000 | -3.358316000 |
| 7  | -0.025108000 | -2.442318000 | -1.193889000 |
| 1  | 0.174553000  | -3.164329000 | -1.871886000 |
| 1  | -0.766178000 | -2.797284000 | -0.602559000 |

**10AIP<sup>N-H</sup> (T.E = -1656.358193)**

|    |              |             |              |
|----|--------------|-------------|--------------|
| 7  | -0.625469000 | 0.074928000 | 0.205119000  |
| 6  | -0.652023000 | 1.477031000 | -0.077870000 |
| 6  | 0.495020000  | 2.249393000 | -0.204780000 |
| 6  | 1.795118000  | 1.745394000 | -0.116676000 |
| 1  | 0.355765000  | 3.306139000 | -0.405165000 |
| 1  | 2.563071000  | 2.512464000 | -0.268448000 |
| 15 | -2.260844000 | 0.108853000 | 0.045324000  |
| 6  | -2.023887000 | 1.784601000 | -0.206303000 |

|    |              |              |              |
|----|--------------|--------------|--------------|
| 6  | -2.730683000 | 3.018867000  | -0.616209000 |
| 1  | -2.577498000 | 3.845950000  | 0.085799000  |
| 1  | -2.411712000 | 3.378425000  | -1.603845000 |
| 1  | -3.809051000 | 2.850834000  | -0.672114000 |
| 6  | 2.195483000  | 0.440962000  | 0.124464000  |
| 15 | 3.837351000  | 0.023442000  | 0.092298000  |
| 6  | 5.018818000  | 1.393760000  | 0.096814000  |
| 1  | 6.037702000  | 1.002836000  | 0.101231000  |
| 1  | 4.882184000  | 2.009637000  | -0.792913000 |
| 1  | 4.866514000  | 2.014020000  | 0.980818000  |
| 6  | 4.296597000  | -0.987476000 | -1.332959000 |
| 1  | 5.327165000  | -1.342201000 | -1.260929000 |
| 1  | 3.602794000  | -1.833363000 | -1.363424000 |
| 1  | 4.171264000  | -0.400321000 | -2.243892000 |
| 6  | 4.288722000  | -1.010199000 | 1.499654000  |
| 1  | 4.118494000  | -0.458292000 | 2.424577000  |
| 1  | 3.641280000  | -1.889901000 | 1.505454000  |
| 1  | 5.331883000  | -1.326441000 | 1.438499000  |
| 7  | -2.927761000 | -0.756742000 | -1.206058000 |
| 7  | -3.000986000 | -0.569155000 | 1.370577000  |
| 6  | -2.870587000 | -2.211295000 | -1.150055000 |
| 1  | -1.875343000 | -2.578532000 | -1.437621000 |
| 1  | -3.085637000 | -2.564432000 | -0.143027000 |
| 1  | -3.612325000 | -2.629986000 | -1.835621000 |
| 6  | -2.656407000 | -0.252459000 | -2.541863000 |
| 1  | -3.365775000 | -0.698256000 | -3.243849000 |
| 1  | -2.766509000 | 0.830728000  | -2.571234000 |
| 1  | -1.638580000 | -0.506723000 | -2.870187000 |
| 6  | -4.450400000 | -0.524726000 | 1.435289000  |
| 1  | -4.809897000 | -1.303182000 | 2.114012000  |
| 1  | -4.809999000 | 0.444358000  | 1.810116000  |
| 1  | -4.885149000 | -0.697111000 | 0.451111000  |
| 6  | -2.374630000 | -0.329874000 | 2.661814000  |
| 1  | -1.299899000 | -0.494336000 | 2.598929000  |
| 1  | -2.561202000 | 0.690828000  | 3.022755000  |
| 1  | -2.791070000 | -1.033042000 | 3.387109000  |
| 13 | 0.873222000  | -1.032254000 | 0.402997000  |
| 1  | 0.876188000  | -1.733726000 | 1.850745000  |
| 7  | 1.080079000  | -2.351072000 | -0.842155000 |
| 1  | 1.017430000  | -2.200395000 | -1.838641000 |
| 1  | 0.840535000  | -3.310693000 | -0.643835000 |

**11AIP<sup>N-H</sup> (T.E = -1574.166981)**

|    |              |              |              |
|----|--------------|--------------|--------------|
| 7  | -0.768064000 | -0.089935000 | 0.304112000  |
| 6  | -0.838342000 | 1.252893000  | -0.087711000 |
| 6  | 1.654610000  | 1.570752000  | -0.184119000 |
| 15 | -2.415774000 | -0.124725000 | 0.182690000  |
| 6  | -2.202542000 | 1.549223000  | -0.205624000 |

|    |              |              |              |
|----|--------------|--------------|--------------|
| 6  | -3.070706000 | 2.690333000  | -0.599817000 |
| 1  | -3.066796000 | 3.515894000  | 0.117647000  |
| 1  | -2.819332000 | 3.108449000  | -1.579248000 |
| 1  | -4.106367000 | 2.346451000  | -0.667090000 |
| 7  | -3.118821000 | -1.037498000 | -0.988120000 |
| 7  | -3.056423000 | -0.720475000 | 1.577075000  |
| 6  | -3.089215000 | -2.494702000 | -0.885533000 |
| 1  | -2.170454000 | -2.884469000 | -1.340351000 |
| 1  | -3.114611000 | -2.806629000 | 0.157326000  |
| 1  | -3.961984000 | -2.909052000 | -1.397232000 |
| 6  | -3.040442000 | -0.581931000 | -2.367149000 |
| 1  | -3.861427000 | -1.027116000 | -2.934732000 |
| 1  | -3.125538000 | 0.501979000  | -2.421603000 |
| 1  | -2.094434000 | -0.887334000 | -2.830398000 |
| 6  | -4.491289000 | -0.868878000 | 1.731983000  |
| 1  | -4.708009000 | -1.771767000 | 2.310723000  |
| 1  | -4.924424000 | -0.012811000 | 2.263430000  |
| 1  | -4.977832000 | -0.957521000 | 0.761572000  |
| 6  | -2.353772000 | -0.523857000 | 2.834902000  |
| 1  | -1.277512000 | -0.552323000 | 2.677454000  |
| 1  | -2.624409000 | 0.429943000  | 3.303893000  |
| 1  | -2.625528000 | -1.331772000 | 3.518711000  |
| 7  | 0.259818000  | 1.997120000  | -0.288220000 |
| 6  | 0.042344000  | 3.397374000  | -0.622264000 |
| 1  | -0.391169000 | 3.496363000  | -1.619317000 |
| 1  | -0.623333000 | 3.861546000  | 0.105774000  |
| 1  | 1.005262000  | 3.896966000  | -0.599141000 |
| 8  | 2.487124000  | 2.446779000  | -0.241555000 |
| 7  | 1.883554000  | 0.249833000  | -0.071668000 |
| 6  | 3.252117000  | -0.121127000 | 0.070070000  |
| 6  | 4.030968000  | 0.348413000  | 1.122037000  |
| 6  | 3.798486000  | -1.038804000 | -0.816985000 |
| 6  | 5.332641000  | -0.086721000 | 1.272645000  |
| 1  | 3.605380000  | 1.062381000  | 1.816652000  |
| 6  | 5.102683000  | -1.479545000 | -0.657534000 |
| 1  | 3.186962000  | -1.403865000 | -1.635221000 |
| 6  | 5.875795000  | -1.003590000 | 0.384719000  |
| 1  | 5.929772000  | 0.289705000  | 2.095578000  |
| 1  | 5.515042000  | -2.195817000 | -1.359129000 |
| 1  | 6.896977000  | -1.344547000 | 0.508824000  |
| 13 | 0.698234000  | -1.229573000 | 0.063740000  |
| 1  | 0.964765000  | -2.129574000 | 1.343209000  |
| 7  | 0.421717000  | -2.213277000 | -1.436866000 |
| 1  | 0.484640000  | -1.815164000 | -2.363143000 |
| 1  | 0.774453000  | -3.158203000 | -1.482636000 |

**$^{13}\text{AIP}^{\text{N-H}}$  (T.E = -1899.714015)**

|   |             |              |              |
|---|-------------|--------------|--------------|
| 7 | 1.358052000 | -0.124382000 | -0.057056000 |
|---|-------------|--------------|--------------|

|    |              |              |              |
|----|--------------|--------------|--------------|
| 6  | 1.224643000  | 1.247311000  | -0.460127000 |
| 6  | 0.003593000  | 1.889238000  | -0.617066000 |
| 6  | -1.214694000 | 1.275158000  | -0.356292000 |
| 1  | 0.000894000  | 2.916541000  | -0.965082000 |
| 13 | 0.020317000  | -1.278457000 | 0.567251000  |
| 15 | 2.980095000  | 0.136469000  | -0.042284000 |
| 6  | 2.549614000  | 1.694890000  | -0.611540000 |
| 6  | 3.110850000  | 3.032020000  | -0.909308000 |
| 1  | 2.815142000  | 3.398558000  | -1.898319000 |
| 1  | 2.796135000  | 3.792079000  | -0.182025000 |
| 1  | 4.202889000  | 3.012181000  | -0.895854000 |
| 7  | -1.334831000 | -0.054425000 | 0.170857000  |
| 6  | -2.543830000 | 1.701544000  | -0.527075000 |
| 15 | -2.958896000 | 0.132932000  | 0.026590000  |
| 6  | -3.127097000 | 2.916168000  | -1.140648000 |
| 1  | -2.996182000 | 3.814492000  | -0.527163000 |
| 1  | -2.684559000 | 3.133125000  | -2.121031000 |
| 1  | -4.202356000 | 2.796390000  | -1.296536000 |
| 7  | -3.765028000 | -0.854611000 | -1.034178000 |
| 7  | -3.725514000 | -0.194693000 | 1.464175000  |
| 6  | -3.905084000 | -2.269042000 | -0.704550000 |
| 1  | -2.967672000 | -2.812284000 | -0.886457000 |
| 1  | -4.168066000 | -2.393543000 | 0.344201000  |
| 1  | -4.698103000 | -2.702686000 | -1.319547000 |
| 6  | -3.466697000 | -0.650116000 | -2.442020000 |
| 1  | -2.507943000 | -1.108722000 | -2.722029000 |
| 1  | -4.255192000 | -1.106718000 | -3.045495000 |
| 1  | -3.419405000 | 0.413482000  | -2.672558000 |
| 6  | -3.039947000 | 0.209016000  | 2.681660000  |
| 1  | -3.498107000 | -0.307295000 | 3.528701000  |
| 1  | -1.987781000 | -0.067806000 | 2.636708000  |
| 1  | -3.117519000 | 1.291375000  | 2.853377000  |
| 6  | -5.159829000 | 0.017980000  | 1.536608000  |
| 1  | -5.402546000 | 1.070681000  | 1.740094000  |
| 1  | -5.640496000 | -0.272296000 | 0.603001000  |
| 1  | -5.578945000 | -0.587374000 | 2.345250000  |
| 7  | 3.774942000  | -1.032405000 | -0.907850000 |
| 7  | 3.741496000  | 0.056653000  | 1.431973000  |
| 6  | 5.221107000  | -1.112349000 | -0.928941000 |
| 1  | 5.530601000  | -2.158141000 | -1.023731000 |
| 1  | 5.641999000  | -0.559023000 | -1.778724000 |
| 1  | 5.643457000  | -0.708304000 | -0.010425000 |
| 6  | 3.159532000  | -1.489751000 | -2.140287000 |
| 1  | 2.075026000  | -1.447936000 | -2.053487000 |
| 1  | 3.475309000  | -0.882401000 | -2.998224000 |
| 1  | 3.451745000  | -2.527263000 | -2.324830000 |
| 6  | 3.474922000  | 1.154970000  | 2.347480000  |
| 1  | 4.210031000  | 1.129677000  | 3.155857000  |
| 1  | 3.554035000  | 2.111497000  | 1.833043000  |

|   |              |              |              |
|---|--------------|--------------|--------------|
| 1 | 2.471700000  | 1.078555000  | 2.789785000  |
| 6 | 3.758177000  | -1.229730000 | 2.118475000  |
| 1 | 3.897505000  | -2.043870000 | 1.408377000  |
| 1 | 4.580480000  | -1.249663000 | 2.839130000  |
| 1 | 2.815193000  | -1.402524000 | 2.654296000  |
| 1 | 0.168131000  | -1.592177000 | 2.132727000  |
| 7 | -0.170859000 | -2.816851000 | -0.360247000 |
| 1 | -0.182553000 | -2.903995000 | -1.364441000 |
| 1 | -0.024336000 | -3.724537000 | 0.050634000  |

**1GaP<sup>N-H</sup>** (T.E = -2669.791340)

|    |              |              |              |
|----|--------------|--------------|--------------|
| 7  | -0.607318000 | -0.323797000 | 1.456863000  |
| 7  | -0.605473000 | -0.331524000 | -1.459990000 |
| 6  | -1.795893000 | -0.835937000 | 1.234681000  |
| 6  | -1.795154000 | -0.848670000 | -1.234565000 |
| 6  | -2.356471000 | -1.137794000 | -0.000585000 |
| 1  | -3.332439000 | -1.602356000 | 0.001253000  |
| 6  | -0.253951000 | 0.049771000  | 2.772680000  |
| 6  | -1.162428000 | 0.689471000  | 3.610952000  |
| 6  | 1.038557000  | -0.197586000 | 3.226154000  |
| 6  | -0.790841000 | 1.049462000  | 4.893567000  |
| 6  | 1.401563000  | 0.171830000  | 4.507937000  |
| 6  | 0.490926000  | 0.790962000  | 5.348709000  |
| 1  | -1.505114000 | 1.552294000  | 5.535386000  |
| 1  | 2.407578000  | -0.033321000 | 4.855377000  |
| 1  | 0.781748000  | 1.079592000  | 6.351709000  |
| 6  | -0.258355000 | 0.046166000  | -2.772255000 |
| 6  | 1.046450000  | -0.149982000 | -3.216275000 |
| 6  | -1.179301000 | 0.646568000  | -3.627086000 |
| 6  | 1.412763000  | 0.225620000  | -4.494724000 |
| 6  | -0.807168000 | 1.013154000  | -4.907488000 |
| 6  | 0.488188000  | 0.803522000  | -5.349128000 |
| 1  | 2.430421000  | 0.058939000  | -4.828321000 |
| 1  | -1.533721000 | 1.484542000  | -5.559316000 |
| 1  | 0.778451000  | 1.098346000  | -6.350302000 |
| 1  | -2.181517000 | 0.858086000  | -3.271511000 |
| 1  | 1.761283000  | -0.625135000 | -2.552086000 |
| 1  | 1.735765000  | -0.706138000 | 2.566116000  |
| 1  | -2.152035000 | 0.934975000  | 3.241502000  |
| 31 | 0.720749000  | -0.002950000 | 0.003662000  |
| 1  | -2.401640000 | -1.078812000 | -2.113263000 |
| 1  | -2.405849000 | -1.052533000 | 2.114462000  |
| 1  | 1.222393000  | 1.474538000  | -0.016032000 |
| 7  | 1.970884000  | -1.379788000 | 0.146917000  |
| 1  | 1.676021000  | -2.308146000 | -0.121275000 |
| 1  | 2.885199000  | -1.208415000 | -0.246192000 |

**4GaP<sup>N-H</sup> (T.E = -2882.579751)**

|    |              |              |              |
|----|--------------|--------------|--------------|
| 7  | 1.279791000  | 0.735549000  | -0.278996000 |
| 6  | 0.988555000  | 2.033609000  | -0.291329000 |
| 6  | -0.254923000 | 2.627349000  | -0.292779000 |
| 6  | -1.488534000 | 1.959085000  | -0.173400000 |
| 6  | -1.680873000 | 0.605456000  | -0.166152000 |
| 6  | 2.611799000  | 0.338197000  | -0.093418000 |
| 6  | 3.069214000  | -0.825233000 | -0.712563000 |
| 6  | 3.494698000  | 1.044869000  | 0.723639000  |
| 6  | 4.371849000  | -1.250544000 | -0.540226000 |
| 1  | 2.390252000  | -1.381441000 | -1.350729000 |
| 6  | 4.799922000  | 0.616510000  | 0.886464000  |
| 1  | 3.143931000  | 1.918776000  | 1.260816000  |
| 6  | 5.249211000  | -0.530975000 | 0.255868000  |
| 1  | 4.707328000  | -2.152749000 | -1.039271000 |
| 1  | 5.467677000  | 1.178872000  | 1.529704000  |
| 1  | 6.269945000  | -0.867833000 | 0.391490000  |
| 1  | 1.843033000  | 2.713523000  | -0.307546000 |
| 15 | -3.209842000 | -0.093809000 | 0.135960000  |
| 6  | -4.610209000 | 1.044158000  | 0.084774000  |
| 1  | -5.535744000 | 0.496991000  | 0.270838000  |
| 1  | -4.495490000 | 1.811859000  | 0.850899000  |
| 1  | -4.666063000 | 1.525223000  | -0.892361000 |
| 6  | -3.566733000 | -1.393107000 | -1.056852000 |
| 1  | -3.557393000 | -0.979926000 | -2.065870000 |
| 1  | -2.784415000 | -2.151764000 | -0.985861000 |
| 1  | -4.534275000 | -1.853820000 | -0.850037000 |
| 6  | -3.280272000 | -0.919950000 | 1.731886000  |
| 1  | -3.176595000 | -0.180133000 | 2.526777000  |
| 1  | -4.218950000 | -1.464712000 | 1.853169000  |
| 1  | -2.425376000 | -1.606309000 | 1.770738000  |
| 1  | -2.349266000 | 2.627291000  | -0.066355000 |
| 1  | -0.267561000 | 3.709294000  | -0.332678000 |
| 31 | -0.147176000 | -0.664094000 | -0.423201000 |
| 1  | -0.068889000 | -1.430875000 | -1.808327000 |
| 7  | -0.124305000 | -1.866285000 | 1.046235000  |
| 1  | 0.477058000  | -2.669409000 | 0.908377000  |
| 1  | 0.180245000  | -1.430209000 | 1.909902000  |

**6GaP<sup>N-H</sup> (T.E = -3013.160003)**

|    |              |              |              |
|----|--------------|--------------|--------------|
| 6  | -1.516673000 | 1.506096000  | -0.079478000 |
| 6  | -1.523089000 | 0.116937000  | -0.193272000 |
| 6  | 0.999139000  | 1.710423000  | -0.217161000 |
| 1  | 1.787210000  | 2.468593000  | -0.196017000 |
| 7  | 1.361954000  | 0.468831000  | -0.240714000 |
| 15 | -3.074624000 | -0.538193000 | 0.090105000  |
| 6  | -3.696840000 | -0.294492000 | 1.767901000  |



|    |              |              |               |
|----|--------------|--------------|---------------|
| 1  | -3.720394000 | 0.774987000  | 1.977261000   |
| 1  | -4.696886000 | -0.717087000 | 1.884453000   |
| 1  | -3.009872000 | -0.784551000 | 2.460176000   |
| 6  | -4.392174000 | 0.056998000  | -0.991663000  |
| 1  | -4.128025000 | -0.166331000 | -2.026042000  |
| 1  | -5.337761000 | -0.429975000 | -0.7444440000 |
| 1  | -4.482190000 | 1.135607000  | -0.870014000  |
| 6  | -3.033670000 | -2.319751000 | -0.141802000  |
| 1  | -2.267856000 | -2.746412000 | 0.513281000   |
| 1  | -4.010376000 | -2.750627000 | 0.084556000   |
| 1  | -2.770769000 | -2.546417000 | -1.177006000  |
| 8  | -2.472345000 | 2.254624000  | 0.134453000   |
| 7  | -0.233090000 | 2.221422000  | -0.223124000  |
| 6  | -0.360734000 | 3.671626000  | -0.250741000  |
| 1  | -1.000056000 | 3.977987000  | -1.077695000  |
| 1  | -0.815094000 | 4.037337000  | 0.669217000   |
| 1  | 0.625518000  | 4.115960000  | -0.376831000  |
| 6  | 2.735366000  | 0.180809000  | -0.081110000  |
| 6  | 3.320244000  | -0.792419000 | -0.884388000  |
| 6  | 3.504107000  | 0.814580000  | 0.889425000   |
| 6  | 4.659449000  | -1.098905000 | -0.737481000  |
| 1  | 2.710601000  | -1.294785000 | -1.627202000  |
| 6  | 4.846223000  | 0.505225000  | 1.027721000   |
| 1  | 3.037526000  | 1.528378000  | 1.559855000   |
| 6  | 5.430260000  | -0.449130000 | 0.213941000   |
| 1  | 5.106371000  | -1.853064000 | -1.374853000  |
| 1  | 5.433646000  | 1.003523000  | 1.790287000   |
| 1  | 6.478945000  | -0.695865000 | 0.328352000   |
| 31 | 0.017049000  | -1.087088000 | -0.391525000  |
| 1  | 0.342080000  | -1.838390000 | -1.742733000  |
| 7  | 0.172025000  | -2.197055000 | 1.123120000   |
| 1  | 0.913001000  | -2.885274000 | 1.107330000   |
| 1  | 0.238125000  | -1.698320000 | 2.001830000   |

**8GaP<sup>N-H</sup>** (T.E = -3247.203287)

|    |              |              |              |
|----|--------------|--------------|--------------|
| 7  | 1.407642000  | 0.268406000  | -0.994374000 |
| 6  | 1.085187000  | 1.523325000  | -0.419904000 |
| 6  | -0.005655000 | 2.313622000  | -0.987907000 |
| 15 | 2.391828000  | 0.052800000  | 0.321044000  |
| 6  | 1.842872000  | 1.667555000  | 0.712619000  |
| 6  | 1.960682000  | 2.736349000  | 1.728004000  |
| 1  | 2.962172000  | 3.174526000  | 1.776408000  |
| 1  | 1.264520000  | 3.547274000  | 1.495493000  |
| 1  | 1.717611000  | 2.385786000  | 2.736569000  |
| 7  | 2.075029000  | -1.077170000 | 1.464450000  |
| 7  | 3.931896000  | -0.281597000 | -0.162442000 |
| 6  | 2.438750000  | -2.479268000 | 1.283813000  |
| 1  | 1.612885000  | -3.018795000 | 0.807887000  |

|    |              |              |              |
|----|--------------|--------------|--------------|
| 1  | 3.315898000  | -2.569525000 | 0.645957000  |
| 1  | 2.667715000  | -2.911512000 | 2.262238000  |
| 6  | 0.874881000  | -0.918965000 | 2.273609000  |
| 1  | 1.039004000  | -1.381161000 | 3.250504000  |
| 1  | 0.644115000  | 0.136205000  | 2.418051000  |
| 1  | 0.012251000  | -1.400606000 | 1.797833000  |
| 6  | 4.996464000  | -0.395261000 | 0.816154000  |
| 1  | 5.703425000  | -1.171683000 | 0.507755000  |
| 1  | 5.548702000  | 0.548004000  | 0.911591000  |
| 1  | 4.598495000  | -0.662588000 | 1.794140000  |
| 6  | 4.391943000  | 0.171458000  | -1.463097000 |
| 1  | 3.560205000  | 0.205988000  | -2.163131000 |
| 1  | 4.847205000  | 1.168105000  | -1.402362000 |
| 1  | 5.145885000  | -0.525672000 | -1.839066000 |
| 6  | -2.466709000 | -0.554287000 | -0.040151000 |
| 6  | -2.664275000 | -0.457205000 | 1.340944000  |
| 6  | -3.218855000 | -1.507700000 | -0.732799000 |
| 6  | -3.583053000 | -1.260022000 | 1.992175000  |
| 1  | -2.081867000 | 0.273577000  | 1.894631000  |
| 6  | -4.129944000 | -2.316465000 | -0.077538000 |
| 1  | -3.082320000 | -1.593339000 | -1.806907000 |
| 6  | -4.322692000 | -2.198073000 | 1.289591000  |
| 1  | -3.716877000 | -1.156478000 | 3.063673000  |
| 1  | -4.701068000 | -3.043561000 | -0.644462000 |
| 1  | -5.038696000 | -2.829863000 | 1.801269000  |
| 7  | -1.517414000 | 0.231425000  | -0.695115000 |
| 5  | -1.414880000 | 1.638001000  | -0.551247000 |
| 7  | -2.471035000 | 2.496958000  | -0.113387000 |
| 6  | -3.867786000 | 2.132469000  | -0.150776000 |
| 1  | -4.025225000 | 1.224370000  | -0.728742000 |
| 1  | -4.284095000 | 1.971157000  | 0.853291000  |
| 1  | -4.446642000 | 2.936993000  | -0.621695000 |
| 6  | -2.301757000 | 3.824647000  | 0.417023000  |
| 1  | -1.252716000 | 4.068347000  | 0.577106000  |
| 1  | -2.736939000 | 4.589597000  | -0.241249000 |
| 1  | -2.805865000 | 3.914789000  | 1.388584000  |
| 1  | 0.073496000  | 3.361242000  | -0.701332000 |
| 1  | 0.043356000  | 2.259748000  | -2.082366000 |
| 31 | -0.154662000 | -0.765301000 | -1.692854000 |
| 1  | -0.189678000 | -0.581289000 | -3.256082000 |
| 7  | 0.015715000  | -2.483404000 | -0.920805000 |
| 1  | 0.143860000  | -3.213520000 | -1.610797000 |
| 1  | -0.820474000 | -2.739198000 | -0.404593000 |

**10GaP<sup>N-H</sup>** (T.E = -3338.699707)

|   |              |             |              |
|---|--------------|-------------|--------------|
| 7 | -0.697194000 | 0.238936000 | 0.376197000  |
| 6 | -0.706569000 | 1.557520000 | -0.171222000 |
| 6 | 0.451916000  | 2.288791000 | -0.442860000 |

|    |              |              |              |
|----|--------------|--------------|--------------|
| 6  | 1.746566000  | 1.796939000  | -0.321084000 |
| 1  | 0.314373000  | 3.313061000  | -0.772032000 |
| 1  | 2.517311000  | 2.552008000  | -0.510997000 |
| 15 | -2.323785000 | 0.221719000  | 0.110468000  |
| 6  | -2.065683000 | 1.853914000  | -0.365540000 |
| 6  | -2.754634000 | 3.018321000  | -0.966734000 |
| 1  | -2.771445000 | 3.897427000  | -0.312391000 |
| 1  | -2.282626000 | 3.330597000  | -1.906979000 |
| 1  | -3.795851000 | 2.780186000  | -1.198898000 |
| 6  | 2.159335000  | 0.503580000  | -0.027699000 |
| 15 | 3.787337000  | 0.115912000  | 0.175829000  |
| 6  | 4.983216000  | 1.392196000  | -0.284141000 |
| 1  | 5.998053000  | 1.020473000  | -0.133158000 |
| 1  | 4.851642000  | 1.664124000  | -1.332011000 |
| 1  | 4.837424000  | 2.280811000  | 0.331036000  |
| 6  | 4.262954000  | -1.353529000 | -0.760819000 |
| 1  | 5.301556000  | -1.628861000 | -0.566642000 |
| 1  | 3.609785000  | -2.178781000 | -0.468958000 |
| 1  | 4.118004000  | -1.167551000 | -1.825492000 |
| 6  | 4.223219000  | -0.330396000 | 1.875048000  |
| 1  | 4.081041000  | 0.537525000  | 2.520006000  |
| 1  | 3.542545000  | -1.118025000 | 2.204705000  |
| 1  | 5.254631000  | -0.682052000 | 1.950308000  |
| 31 | 0.805473000  | -0.978927000 | 0.152979000  |
| 7  | -2.942160000 | -0.780654000 | -1.049512000 |
| 7  | -3.114985000 | -0.290674000 | 1.475633000  |
| 6  | -2.906504000 | -2.224877000 | -0.843122000 |
| 1  | -1.956192000 | -2.631486000 | -1.211747000 |
| 1  | -3.002379000 | -2.464282000 | 0.215187000  |
| 1  | -3.737826000 | -2.688937000 | -1.382893000 |
| 6  | -2.700978000 | -0.431367000 | -2.441314000 |
| 1  | -3.457371000 | -0.916854000 | -3.064693000 |
| 1  | -2.768335000 | 0.646354000  | -2.582771000 |
| 1  | -1.708728000 | -0.774048000 | -2.762041000 |
| 6  | -4.552093000 | -0.462843000 | 1.495073000  |
| 1  | -4.816777000 | -1.295496000 | 2.155231000  |
| 1  | -5.059619000 | 0.436440000  | 1.868588000  |
| 1  | -4.927808000 | -0.681883000 | 0.496744000  |
| 6  | -2.565067000 | 0.078493000  | 2.766187000  |
| 1  | -1.480069000 | 0.143250000  | 2.703935000  |
| 1  | -2.959918000 | 1.042224000  | 3.113786000  |
| 1  | -2.831128000 | -0.685478000 | 3.502596000  |
| 1  | 0.944977000  | -1.980650000 | 1.381184000  |
| 7  | 0.483304000  | -1.919936000 | -1.478660000 |
| 1  | 0.869166000  | -1.452656000 | -2.291732000 |
| 1  | 0.835785000  | -2.869329000 | -1.492928000 |

**11GaP<sup>N-H</sup>** (T.E = -3256.501293)

|    |              |              |              |
|----|--------------|--------------|--------------|
| 7  | -0.817571000 | -0.083428000 | 0.358410000  |
| 6  | -0.882409000 | 1.287218000  | 0.040379000  |
| 6  | 1.609402000  | 1.626104000  | 0.110698000  |
| 7  | 1.882924000  | 0.315959000  | 0.024808000  |
| 15 | -2.465901000 | -0.097670000 | 0.174932000  |
| 6  | -2.242076000 | 1.604549000  | -0.044562000 |
| 6  | -3.095359000 | 2.801357000  | -0.266897000 |
| 1  | -2.802022000 | 3.651742000  | 0.352573000  |
| 1  | -3.110079000 | 3.146074000  | -1.307786000 |
| 1  | -4.129929000 | 2.568749000  | -0.003357000 |
| 6  | 3.226768000  | -0.078419000 | 0.249873000  |
| 6  | 3.490167000  | -1.085318000 | 1.170563000  |
| 6  | 4.284044000  | 0.468450000  | -0.469940000 |
| 6  | 4.782986000  | -1.538210000 | 1.369504000  |
| 1  | 2.665633000  | -1.507953000 | 1.734106000  |
| 6  | 5.574040000  | 0.016649000  | -0.265610000 |
| 1  | 4.084721000  | 1.257250000  | -1.184337000 |
| 6  | 5.831395000  | -0.988760000 | 0.653201000  |
| 1  | 4.969797000  | -2.323098000 | 2.093668000  |
| 1  | 6.388251000  | 0.453798000  | -0.832669000 |
| 1  | 6.844583000  | -1.340293000 | 0.809301000  |
| 31 | 0.616631000  | -1.077219000 | -0.535797000 |
| 7  | -3.122936000 | -0.899244000 | -1.096073000 |
| 7  | -3.153579000 | -0.816213000 | 1.487035000  |
| 6  | -2.951097000 | -2.343038000 | -1.191953000 |
| 1  | -2.775690000 | -2.778724000 | -0.208010000 |
| 1  | -3.851618000 | -2.796607000 | -1.616899000 |
| 1  | -2.094841000 | -2.575039000 | -1.835505000 |
| 6  | -3.216377000 | -0.257767000 | -2.399871000 |
| 1  | -3.411549000 | 0.807388000  | -2.288225000 |
| 1  | -2.287006000 | -0.398084000 | -2.963030000 |
| 1  | -4.046606000 | -0.707151000 | -2.951906000 |
| 6  | -4.546818000 | -1.209566000 | 1.538000000  |
| 1  | -4.638179000 | -2.181829000 | 2.032644000  |
| 1  | -5.142523000 | -0.485079000 | 2.106016000  |
| 1  | -4.962338000 | -1.291090000 | 0.535502000  |
| 6  | -2.557584000 | -0.613084000 | 2.796214000  |
| 1  | -1.505334000 | -0.355083000 | 2.692737000  |
| 1  | -3.070826000 | 0.184225000  | 3.346224000  |
| 1  | -2.635377000 | -1.536001000 | 3.377659000  |
| 8  | 2.379576000  | 2.528452000  | 0.352143000  |
| 7  | 0.225998000  | 2.022884000  | -0.153116000 |
| 6  | 0.047071000  | 3.442486000  | -0.422310000 |
| 1  | -0.782936000 | 3.575776000  | -1.113327000 |
| 1  | -0.147227000 | 4.005867000  | 0.493372000  |
| 1  | 0.957299000  | 3.832925000  | -0.865651000 |
| 1  | 0.861025000  | -2.496504000 | 0.070453000  |
| 7  | 0.182907000  | -0.965064000 | -2.370636000 |

|   |             |              |              |
|---|-------------|--------------|--------------|
| 1 | 0.410406000 | -0.062368000 | -2.773590000 |
| 1 | 0.652824000 | -1.654559000 | -2.944048000 |

**$^{13}\text{GaP}^{\text{N-H}}$  (T.E = -3582.043684)**

|    |              |              |              |
|----|--------------|--------------|--------------|
| 7  | 1.376899000  | -0.051323000 | -0.349159000 |
| 6  | 1.234229000  | 1.372521000  | -0.484315000 |
| 6  | 0.015995000  | 2.036963000  | -0.532269000 |
| 6  | -1.218136000 | 1.397980000  | -0.464519000 |
| 1  | 0.031321000  | 3.119167000  | -0.606545000 |
| 15 | 2.982035000  | 0.230844000  | -0.133125000 |
| 6  | 2.558147000  | 1.852900000  | -0.485298000 |
| 6  | 3.104867000  | 3.228083000  | -0.527408000 |
| 1  | 2.845774000  | 3.750790000  | -1.454455000 |
| 1  | 2.741101000  | 3.851923000  | 0.300277000  |
| 1  | 4.195313000  | 3.221183000  | -0.464816000 |
| 7  | -1.369267000 | -0.020767000 | -0.319960000 |
| 6  | -2.535599000 | 1.886521000  | -0.470143000 |
| 15 | -2.977327000 | 0.260034000  | -0.129041000 |
| 6  | -3.083205000 | 3.256856000  | -0.580655000 |
| 1  | -3.138383000 | 3.791743000  | 0.377462000  |
| 1  | -2.460463000 | 3.864037000  | -1.244447000 |
| 1  | -4.090004000 | 3.261033000  | -1.005176000 |
| 7  | -3.871526000 | -0.743335000 | -1.088285000 |
| 7  | -3.614917000 | -0.033774000 | 1.376689000  |
| 6  | -3.353365000 | -1.108761000 | -2.392149000 |
| 1  | -3.831476000 | -0.525431000 | -3.188339000 |
| 1  | -2.277657000 | -0.942767000 | -2.424862000 |
| 1  | -3.544128000 | -2.170318000 | -2.577415000 |
| 6  | -5.297549000 | -0.933721000 | -0.949314000 |
| 1  | -5.848977000 | -0.386596000 | -1.724100000 |
| 1  | -5.544358000 | -1.996582000 | -1.050050000 |
| 1  | -5.638863000 | -0.591281000 | 0.026040000  |
| 6  | -3.573890000 | -1.403593000 | 1.872877000  |
| 1  | -4.397467000 | -1.570329000 | 2.573568000  |
| 1  | -3.660246000 | -2.115761000 | 1.052756000  |
| 1  | -2.627043000 | -1.603059000 | 2.391875000  |
| 6  | -3.313892000 | 0.935380000  | 2.417022000  |
| 1  | -2.281086000 | 0.835104000  | 2.778971000  |
| 1  | -3.453595000 | 1.950239000  | 2.048742000  |
| 1  | -3.990716000 | 0.772822000  | 3.260101000  |
| 7  | 3.884143000  | -0.793846000 | -1.072928000 |
| 7  | 3.609781000  | -0.051749000 | 1.380263000  |
| 6  | 5.323556000  | -0.891923000 | -0.958210000 |
| 1  | 5.639396000  | -1.926751000 | -1.127901000 |
| 1  | 5.829168000  | -0.261268000 | -1.700768000 |
| 1  | 5.652699000  | -0.588622000 | 0.034260000  |
| 6  | 3.388261000  | -1.113534000 | -2.398517000 |
| 1  | 2.301454000  | -1.043824000 | -2.415118000 |

|    |              |              |              |
|----|--------------|--------------|--------------|
| 1  | 3.800008000  | -0.436201000 | -3.157243000 |
| 1  | 3.679173000  | -2.135959000 | -2.657692000 |
| 6  | 3.289071000  | 0.919044000  | 2.414067000  |
| 1  | 3.969189000  | 0.776288000  | 3.258077000  |
| 1  | 3.408409000  | 1.933597000  | 2.037504000  |
| 1  | 2.258532000  | 0.801625000  | 2.776793000  |
| 6  | 3.606248000  | -1.416069000 | 1.888719000  |
| 1  | 3.748709000  | -2.129967000 | 1.078007000  |
| 1  | 4.416065000  | -1.544582000 | 2.613122000  |
| 1  | 2.654709000  | -1.647520000 | 2.385995000  |
| 31 | -0.010055000 | -1.170086000 | 0.445247000  |
| 1  | 0.037645000  | -1.177961000 | 2.034536000  |
| 7  | -0.206136000 | -2.851085000 | -0.352212000 |
| 1  | 0.040890000  | -2.889809000 | -1.332643000 |
| 1  | 0.244726000  | -3.626177000 | 0.113128000  |

Cartesian coordinates of the C–F splitting products obtained for some of the representative Al(I)/Ga(I) carbenoids and also their total energies (in hartrees) including the zero point vibrational correction that have been calculated at **M06-D3/Def2-TZVP** level of theory.

**1AIP<sup>C-F</sup>** (T.E = -1758.613174)

|   |              |              |              |
|---|--------------|--------------|--------------|
| 7 | 1.430519000  | -1.674669000 | 0.553968000  |
| 6 | 1.228947000  | -2.317395000 | 1.691068000  |
| 6 | -0.000027000 | -2.583323000 | 2.274108000  |
| 7 | -1.430548000 | -1.674638000 | 0.553964000  |
| 1 | -0.000034000 | -3.079822000 | 3.233717000  |
| 1 | 2.115463000  | -2.672830000 | 2.216849000  |
| 6 | 2.737307000  | -1.646667000 | 0.005821000  |
| 6 | 3.170431000  | -0.507330000 | -0.663425000 |
| 6 | 3.582507000  | -2.747948000 | 0.088363000  |
| 6 | 4.436348000  | -0.462321000 | -1.215058000 |
| 1 | 2.515822000  | 0.355503000  | -0.736632000 |
| 6 | 4.851297000  | -2.693262000 | -0.459007000 |
| 1 | 3.230941000  | -3.663669000 | 0.550025000  |
| 6 | 5.285420000  | -1.551179000 | -1.109538000 |
| 1 | 4.761145000  | 0.434015000  | -1.729736000 |
| 1 | 5.498180000  | -3.560170000 | -0.392441000 |
| 1 | 6.276549000  | -1.514550000 | -1.544944000 |
| 6 | -2.737332000 | -1.646621000 | 0.005808000  |

|    |              |              |              |
|----|--------------|--------------|--------------|
| 6  | -3.170445000 | -0.507280000 | -0.663440000 |
| 6  | -3.582542000 | -2.747894000 | 0.088350000  |
| 6  | -4.436359000 | -0.462262000 | -1.215078000 |
| 1  | -2.515829000 | 0.355547000  | -0.736645000 |
| 6  | -4.851330000 | -2.693197000 | -0.459025000 |
| 1  | -3.230986000 | -3.663615000 | 0.550018000  |
| 6  | -5.285440000 | -1.551113000 | -1.109561000 |
| 1  | -4.761147000 | 0.434076000  | -1.729758000 |
| 1  | -5.498221000 | -3.560100000 | -0.392459000 |
| 1  | -6.276567000 | -1.514476000 | -1.544971000 |
| 6  | -1.228995000 | -2.317368000 | 1.691064000  |
| 1  | -2.115521000 | -2.672787000 | 2.216840000  |
| 13 | -0.000003000 | -0.837305000 | -0.373241000 |
| 9  | -0.000005000 | -1.286514000 | -1.961612000 |
| 6  | 0.000015000  | 1.124418000  | -0.075723000 |
| 6  | 0.000036000  | 2.071622000  | -1.084736000 |
| 6  | 0.000002000  | 1.622810000  | 1.213427000  |
| 6  | 0.000041000  | 3.434557000  | -0.839702000 |
| 6  | 0.000013000  | 2.972663000  | 1.512518000  |
| 6  | 0.000032000  | 3.883693000  | 0.470100000  |
| 9  | 0.000039000  | 1.689696000  | -2.356696000 |
| 9  | 0.000058000  | 4.309772000  | -1.829285000 |
| 9  | 0.000037000  | 5.176191000  | 0.724067000  |
| 9  | -0.000002000 | 3.403400000  | 2.761666000  |
| 9  | -0.000026000 | 0.774719000  | 2.246165000  |

**4AIP<sup>C-F</sup>** (T.E = -1971.399920)

|    |              |              |              |
|----|--------------|--------------|--------------|
| 7  | -2.137354000 | -0.720973000 | -0.433962000 |
| 6  | -2.376229000 | -1.483982000 | -1.506764000 |
| 6  | -1.564182000 | -2.450945000 | -2.049324000 |
| 6  | -0.330344000 | -2.877327000 | -1.520963000 |
| 6  | 0.314675000  | -2.337629000 | -0.437476000 |
| 6  | -3.183136000 | 0.095720000  | 0.048529000  |
| 6  | -2.883011000 | 1.341534000  | 0.593014000  |
| 6  | -4.511899000 | -0.321553000 | 0.029042000  |
| 6  | -3.885997000 | 2.156128000  | 1.081896000  |
| 1  | -1.851677000 | 1.678779000  | 0.618212000  |
| 6  | -5.512629000 | 0.502292000  | 0.511167000  |
| 1  | -4.757720000 | -1.312243000 | -0.335950000 |
| 6  | -5.208025000 | 1.745863000  | 1.037497000  |
| 1  | -3.630183000 | 3.124296000  | 1.496439000  |
| 1  | -6.540517000 | 0.158297000  | 0.490975000  |
| 1  | -5.993503000 | 2.385819000  | 1.420890000  |
| 1  | -3.327630000 | -1.309751000 | -2.009277000 |
| 15 | 1.799759000  | -2.982739000 | 0.120240000  |
| 6  | 2.281910000  | -4.559381000 | -0.608813000 |
| 1  | 3.221051000  | -4.895351000 | -0.166496000 |
| 1  | 1.509682000  | -5.306657000 | -0.423434000 |

|    |              |              |              |
|----|--------------|--------------|--------------|
| 1  | 2.418295000  | -4.450367000 | -1.685422000 |
| 6  | 3.187341000  | -1.870485000 | -0.174354000 |
| 1  | 3.289187000  | -1.694854000 | -1.246017000 |
| 1  | 2.987593000  | -0.914638000 | 0.313375000  |
| 1  | 4.113653000  | -2.290114000 | 0.222609000  |
| 6  | 1.762997000  | -3.217114000 | 1.900422000  |
| 1  | 0.996192000  | -3.950192000 | 2.153180000  |
| 1  | 2.734892000  | -3.549718000 | 2.269204000  |
| 1  | 1.488790000  | -2.271068000 | 2.374024000  |
| 1  | 0.110339000  | -3.728140000 | -2.049610000 |
| 1  | -1.935440000 | -2.947644000 | -2.936427000 |
| 13 | -0.471082000 | -0.770617000 | 0.456150000  |
| 9  | -0.667234000 | -0.977628000 | 2.102396000  |
| 6  | 0.665508000  | 0.856981000  | 0.136948000  |
| 6  | 1.594997000  | 1.335381000  | 1.039755000  |
| 6  | 0.610052000  | 1.529097000  | -1.069479000 |
| 6  | 2.410295000  | 2.426409000  | 0.789782000  |
| 6  | 1.397757000  | 2.626100000  | -1.371586000 |
| 6  | 2.303734000  | 3.077574000  | -0.427063000 |
| 9  | 1.769134000  | 0.719785000  | 2.213108000  |
| 9  | 3.291344000  | 2.848653000  | 1.682506000  |
| 9  | 3.070991000  | 4.118042000  | -0.690005000 |
| 9  | 1.306899000  | 3.242820000  | -2.537908000 |
| 9  | -0.236325000 | 1.118493000  | -2.016261000 |

**6AIP<sup>C-F</sup>** (T.E = -2101.983725)

|    |             |              |              |
|----|-------------|--------------|--------------|
| 6  | 3.014717000 | 0.792652000  | -0.639762000 |
| 6  | 2.298723000 | -0.116142000 | 0.146117000  |
| 6  | 1.242597000 | 2.583898000  | -0.458093000 |
| 1  | 1.009227000 | 3.593607000  | -0.801376000 |
| 13 | 0.584688000 | 0.196526000  | 0.945419000  |
| 7  | 0.364487000 | 1.993502000  | 0.297595000  |
| 15 | 3.110984000 | -1.609912000 | 0.297283000  |
| 6  | 3.373594000 | -2.495007000 | -1.252276000 |
| 1  | 3.979699000 | -1.872639000 | -1.910212000 |
| 1  | 3.875136000 | -3.448682000 | -1.076507000 |
| 1  | 2.404063000 | -2.672268000 | -1.720893000 |
| 6  | 4.730776000 | -1.535993000 | 1.086409000  |
| 1  | 4.615989000 | -1.129505000 | 2.091875000  |
| 1  | 5.177779000 | -2.530453000 | 1.143070000  |
| 1  | 5.370052000 | -0.874335000 | 0.502412000  |
| 6  | 2.124639000 | -2.716731000 | 1.316315000  |
| 1  | 1.169302000 | -2.913534000 | 0.824750000  |
| 1  | 2.648146000 | -3.662096000 | 1.466204000  |
| 1  | 1.926889000 | -2.253821000 | 2.285484000  |
| 8  | 4.106259000 | 0.640510000  | -1.181774000 |
| 7  | 2.417766000 | 2.126457000  | -0.875546000 |
| 6  | 3.245836000 | 3.015013000  | -1.680710000 |



|   |              |              |              |
|---|--------------|--------------|--------------|
| 1 | 4.203410000  | 3.187147000  | -1.191316000 |
| 1 | 3.446395000  | 2.566633000  | -2.652287000 |
| 1 | 2.729732000  | 3.964300000  | -1.813945000 |
| 6 | -0.884974000 | 2.642867000  | 0.491272000  |
| 6 | -1.449797000 | 2.639899000  | 1.760880000  |
| 6 | -1.572426000 | 3.216031000  | -0.571578000 |
| 6 | -2.680018000 | 3.236964000  | 1.964844000  |
| 1 | -0.914012000 | 2.166645000  | 2.576730000  |
| 6 | -2.799839000 | 3.817297000  | -0.355368000 |
| 1 | -1.163634000 | 3.151762000  | -1.574262000 |
| 6 | -3.355362000 | 3.833124000  | 0.912282000  |
| 1 | -3.114032000 | 3.235428000  | 2.957668000  |
| 1 | -3.333260000 | 4.257712000  | -1.189512000 |
| 1 | -4.320728000 | 4.296306000  | 1.077089000  |
| 6 | -0.953351000 | -0.836111000 | 0.188713000  |
| 6 | -1.707962000 | -1.761816000 | 0.884317000  |
| 6 | -1.322500000 | -0.641444000 | -1.129114000 |
| 6 | -2.773340000 | -2.448146000 | 0.325377000  |
| 6 | -2.379503000 | -1.295181000 | -1.735540000 |
| 6 | -3.110809000 | -2.207429000 | -0.994865000 |
| 9 | 0.512350000  | 0.203899000  | 2.615091000  |
| 9 | -1.418926000 | -2.045407000 | 2.152999000  |
| 9 | -3.468523000 | -3.328576000 | 1.026580000  |
| 9 | -4.121930000 | -2.849607000 | -1.547846000 |
| 9 | -2.699851000 | -1.068501000 | -2.999469000 |
| 9 | -0.641754000 | 0.224345000  | -1.891816000 |

**8AIP<sup>C-F</sup>** (T.E = -2336.032890)

|    |              |              |              |
|----|--------------|--------------|--------------|
| 7  | -1.033752000 | -1.140069000 | 0.338715000  |
| 6  | -1.988409000 | -0.705543000 | 1.305511000  |
| 6  | -1.622525000 | 0.334393000  | 2.265899000  |
| 15 | -2.252200000 | -2.062789000 | -0.293051000 |
| 6  | -3.146965000 | -1.384276000 | 1.053365000  |
| 6  | -4.479241000 | -1.415697000 | 1.692634000  |
| 1  | -4.745517000 | -2.410070000 | 2.061851000  |
| 1  | -4.501296000 | -0.737121000 | 2.548587000  |
| 1  | -5.278519000 | -1.103686000 | 1.012600000  |
| 7  | -2.878240000 | -1.718137000 | -1.765170000 |
| 7  | -1.776381000 | -3.630461000 | -0.388446000 |
| 6  | -2.219686000 | -2.140592000 | -2.997564000 |
| 1  | -1.608537000 | -1.327411000 | -3.395517000 |
| 1  | -1.571125000 | -2.995383000 | -2.815657000 |
| 1  | -2.979740000 | -2.424016000 | -3.731022000 |
| 6  | -3.605712000 | -0.464599000 | -1.925682000 |
| 1  | -4.316092000 | -0.569842000 | -2.749013000 |
| 1  | -4.156243000 | -0.218766000 | -1.018910000 |
| 1  | -2.918259000 | 0.357488000  | -2.156398000 |
| 6  | -2.672132000 | -4.659843000 | -0.881068000 |

|    |              |              |              |
|----|--------------|--------------|--------------|
| 1  | -2.126242000 | -5.345880000 | -1.536067000 |
| 1  | -3.093575000 | -5.242186000 | -0.053683000 |
| 1  | -3.491665000 | -4.222030000 | -1.449523000 |
| 6  | -0.710338000 | -4.137152000 | 0.460934000  |
| 1  | -0.052196000 | -3.326200000 | 0.767604000  |
| 1  | -1.113501000 | -4.625539000 | 1.355440000  |
| 1  | -0.127472000 | -4.873794000 | -0.098554000 |
| 13 | 0.114373000  | 0.112344000  | -0.451968000 |
| 6  | -0.370434000 | 2.802109000  | -0.522439000 |
| 6  | -1.481946000 | 3.562166000  | -0.886639000 |
| 6  | 0.866432000  | 3.149287000  | -1.063610000 |
| 6  | -1.353390000 | 4.645335000  | -1.735622000 |
| 1  | -2.452622000 | 3.286764000  | -0.485485000 |
| 6  | 0.990518000  | 4.225533000  | -1.924322000 |
| 1  | 1.742000000  | 2.570119000  | -0.783664000 |
| 6  | -0.116318000 | 4.986066000  | -2.260331000 |
| 1  | -2.231586000 | 5.224800000  | -1.998964000 |
| 1  | 1.964596000  | 4.473262000  | -2.330671000 |
| 1  | -0.018569000 | 5.831642000  | -2.930465000 |
| 7  | -0.502899000 | 1.679682000  | 0.319077000  |
| 5  | -1.155283000 | 1.730677000  | 1.586105000  |
| 7  | -1.335805000 | 2.920012000  | 2.353519000  |
| 6  | -0.559430000 | 4.126019000  | 2.167260000  |
| 1  | 0.288737000  | 3.958096000  | 1.508156000  |
| 1  | -1.158943000 | 4.944648000  | 1.747369000  |
| 1  | -0.170299000 | 4.464066000  | 3.135454000  |
| 6  | -2.256675000 | 3.079544000  | 3.450793000  |
| 1  | -2.959309000 | 2.251958000  | 3.521077000  |
| 1  | -1.735570000 | 3.170359000  | 4.413730000  |
| 1  | -2.847409000 | 3.995089000  | 3.318958000  |
| 1  | -2.423318000 | 0.466100000  | 2.992910000  |
| 1  | -0.742379000 | -0.014020000 | 2.822951000  |
| 9  | -0.213843000 | 0.018347000  | -2.094120000 |
| 6  | 2.018587000  | -0.368722000 | -0.091752000 |
| 6  | 3.042073000  | -0.252875000 | -1.014082000 |
| 6  | 2.387069000  | -0.875791000 | 1.138377000  |
| 6  | 4.349911000  | -0.623053000 | -0.746602000 |
| 6  | 3.675234000  | -1.263393000 | 1.458469000  |
| 6  | 4.664974000  | -1.134183000 | 0.500132000  |
| 9  | 2.801347000  | 0.240825000  | -2.225374000 |
| 9  | 5.300368000  | -0.495941000 | -1.658066000 |
| 9  | 5.904522000  | -1.493388000 | 0.775704000  |
| 9  | 3.975368000  | -1.748799000 | 2.653202000  |
| 9  | 1.467477000  | -1.011719000 | 2.104421000  |

**10AIP<sup>C-F</sup>** (T.E = -2427.529196)

|   |             |             |              |
|---|-------------|-------------|--------------|
| 7 | 1.464060000 | 0.456010000 | -0.162849000 |
| 6 | 2.209197000 | 1.311223000 | -1.037335000 |

|    |              |              |              |
|----|--------------|--------------|--------------|
| 6  | 1.739670000  | 2.553496000  | -1.452606000 |
| 6  | 0.529707000  | 3.117892000  | -1.049310000 |
| 1  | 2.375038000  | 3.119383000  | -2.124303000 |
| 1  | 0.359563000  | 4.110673000  | -1.479383000 |
| 15 | 2.732961000  | -0.594635000 | -0.245562000 |
| 6  | 3.386059000  | 0.589669000  | -1.305155000 |
| 6  | 4.591591000  | 0.911866000  | -2.100144000 |
| 1  | 4.326254000  | 1.520673000  | -2.969424000 |
| 1  | 5.351877000  | 1.472344000  | -1.540187000 |
| 1  | 5.077973000  | 0.012255000  | -2.484373000 |
| 6  | -0.438443000 | 2.596734000  | -0.199173000 |
| 15 | -1.748421000 | 3.544641000  | 0.307111000  |
| 6  | -2.105279000 | 5.007619000  | -0.690227000 |
| 1  | -2.981197000 | 5.521979000  | -0.291595000 |
| 1  | -1.256681000 | 5.692333000  | -0.669249000 |
| 1  | -2.296328000 | 4.713545000  | -1.722802000 |
| 6  | -1.573991000 | 4.157593000  | 1.998180000  |
| 1  | -2.478347000 | 4.665700000  | 2.339974000  |
| 1  | -1.356165000 | 3.304952000  | 2.645244000  |
| 1  | -0.726721000 | 4.843351000  | 2.042168000  |
| 6  | -3.277547000 | 2.592273000  | 0.357015000  |
| 1  | -3.526503000 | 2.245505000  | -0.646236000 |
| 1  | -3.125321000 | 1.717259000  | 0.994286000  |
| 1  | -4.096959000 | 3.188839000  | 0.761758000  |
| 7  | 3.511084000  | -0.890670000 | 1.187202000  |
| 7  | 2.220044000  | -2.096253000 | -0.707640000 |
| 6  | 2.709578000  | -1.488181000 | 2.253122000  |
| 1  | 2.065905000  | -0.738265000 | 2.732580000  |
| 1  | 2.071740000  | -2.280280000 | 1.863512000  |
| 1  | 3.373591000  | -1.916493000 | 3.007905000  |
| 6  | 4.350469000  | 0.189438000  | 1.684436000  |
| 1  | 4.989773000  | -0.198221000 | 2.481105000  |
| 1  | 4.982413000  | 0.581985000  | 0.889283000  |
| 1  | 3.749124000  | 1.013480000  | 2.092891000  |
| 6  | 3.029010000  | -3.290107000 | -0.571017000 |
| 1  | 2.392339000  | -4.136082000 | -0.292741000 |
| 1  | 3.530771000  | -3.541272000 | -1.513789000 |
| 1  | 3.786377000  | -3.156995000 | 0.198994000  |
| 6  | 1.262091000  | -2.168965000 | -1.797188000 |
| 1  | 0.668640000  | -1.255991000 | -1.844061000 |
| 1  | 1.764135000  | -2.313076000 | -2.761352000 |
| 1  | 0.585170000  | -3.012492000 | -1.631462000 |
| 13 | -0.134009000 | 0.855796000  | 0.655257000  |
| 9  | -0.083949000 | 1.021319000  | 2.330830000  |
| 6  | -1.378996000 | -0.689507000 | 0.273239000  |
| 6  | -1.459114000 | -1.791681000 | 1.103519000  |
| 6  | -2.124167000 | -0.774304000 | -0.886560000 |
| 6  | -2.235859000 | -2.904460000 | 0.825153000  |
| 6  | -2.921827000 | -1.857207000 | -1.213057000 |

|   |              |              |              |
|---|--------------|--------------|--------------|
| 6 | -2.976762000 | -2.932063000 | -0.343144000 |
| 9 | -0.746567000 | -1.838388000 | 2.229898000  |
| 9 | -2.277788000 | -3.940037000 | 1.649494000  |
| 9 | -3.726865000 | -3.980280000 | -0.629912000 |
| 9 | -3.623262000 | -1.885958000 | -2.336296000 |
| 9 | -2.085021000 | 0.220888000  | -1.781326000 |

**11AIP<sup>C-F</sup> (T.E = -2345.335075)**

|    |              |              |              |
|----|--------------|--------------|--------------|
| 7  | 1.555791000  | 0.073955000  | -0.221020000 |
| 6  | 2.515343000  | 1.085631000  | -0.425372000 |
| 6  | 0.830402000  | 2.956397000  | -0.420247000 |
| 15 | 2.826667000  | -0.982540000 | -0.088236000 |
| 6  | 3.750779000  | 0.436515000  | -0.467844000 |
| 6  | 5.187335000  | 0.790957000  | -0.611447000 |
| 1  | 5.394824000  | 1.383424000  | -1.504826000 |
| 1  | 5.588355000  | 1.341763000  | 0.246540000  |
| 1  | 5.781502000  | -0.121238000 | -0.700383000 |
| 7  | 3.095745000  | -1.651478000 | 1.386485000  |
| 7  | 2.582310000  | -2.267551000 | -1.078253000 |
| 6  | 2.093414000  | -2.567952000 | 1.930490000  |
| 1  | 1.339010000  | -2.016374000 | 2.504146000  |
| 1  | 1.591705000  | -3.111927000 | 1.130729000  |
| 1  | 2.581850000  | -3.291390000 | 2.587997000  |
| 6  | 3.707485000  | -0.823043000 | 2.419697000  |
| 1  | 4.116727000  | -1.476826000 | 3.193104000  |
| 1  | 4.520117000  | -0.229696000 | 2.004094000  |
| 1  | 2.970226000  | -0.153856000 | 2.878565000  |
| 6  | 3.388166000  | -3.471763000 | -1.022411000 |
| 1  | 2.743037000  | -4.351445000 | -1.110536000 |
| 1  | 4.111842000  | -3.498372000 | -1.844840000 |
| 1  | 3.929316000  | -3.532834000 | -0.079975000 |
| 6  | 1.891457000  | -2.080522000 | -2.344415000 |
| 1  | 1.294580000  | -1.170798000 | -2.321961000 |
| 1  | 2.601811000  | -2.023278000 | -3.176310000 |
| 1  | 1.222493000  | -2.927810000 | -2.519281000 |
| 7  | 2.169064000  | 2.379524000  | -0.531065000 |
| 6  | 3.233674000  | 3.310261000  | -0.880809000 |
| 1  | 4.045202000  | 3.243767000  | -0.156092000 |
| 1  | 3.622417000  | 3.098090000  | -1.878540000 |
| 1  | 2.819166000  | 4.312663000  | -0.876083000 |
| 8  | 0.691629000  | 4.084115000  | -0.825818000 |
| 7  | -0.106767000 | 2.191432000  | 0.177688000  |
| 6  | -1.421523000 | 2.722569000  | 0.292065000  |
| 6  | -2.105683000 | 3.272457000  | -0.786376000 |
| 6  | -2.077455000 | 2.575925000  | 1.509122000  |
| 6  | -3.420537000 | 3.670149000  | -0.638863000 |
| 1  | -1.601936000 | 3.380319000  | -1.738098000 |
| 6  | -3.398907000 | 2.967011000  | 1.647141000  |

|    |              |              |              |
|----|--------------|--------------|--------------|
| 1  | -1.538193000 | 2.158827000  | 2.355548000  |
| 6  | -4.074841000 | 3.518683000  | 0.574518000  |
| 1  | -3.944614000 | 4.096847000  | -1.486463000 |
| 1  | -3.895822000 | 2.843376000  | 2.602282000  |
| 1  | -5.107566000 | 3.829069000  | 0.680069000  |
| 13 | 0.037150000  | 0.433425000  | 0.766473000  |
| 9  | 0.422800000  | 0.278931000  | 2.388498000  |
| 6  | -1.447895000 | -0.747782000 | 0.210084000  |
| 6  | -2.157448000 | -1.558470000 | 1.076214000  |
| 6  | -1.836484000 | -0.802196000 | -1.115788000 |
| 6  | -3.194462000 | -2.378921000 | 0.665743000  |
| 6  | -2.864053000 | -1.604365000 | -1.577176000 |
| 6  | -3.547468000 | -2.398348000 | -0.672254000 |
| 9  | -1.856527000 | -1.578282000 | 2.371829000  |
| 9  | -3.848522000 | -3.142301000 | 1.525029000  |
| 9  | -4.530434000 | -3.174133000 | -1.085226000 |
| 9  | -3.200811000 | -1.627950000 | -2.856091000 |
| 9  | -1.206821000 | -0.053154000 | -2.025489000 |

**13AIP<sup>C-F</sup> (T.E = -2670.885961)**

|    |              |              |              |
|----|--------------|--------------|--------------|
| 7  | 0.624718000  | -1.555606000 | 0.290280000  |
| 6  | 0.154085000  | -2.468779000 | -0.715436000 |
| 6  | -1.145009000 | -2.475418000 | -1.207525000 |
| 6  | -2.101549000 | -1.526740000 | -0.871028000 |
| 1  | -1.418512000 | -3.253458000 | -1.911593000 |
| 13 | -0.296496000 | -0.105718000 | 0.937260000  |
| 15 | 2.113440000  | -2.227986000 | 0.080314000  |
| 6  | 1.282537000  | -3.244867000 | -1.023306000 |
| 6  | 1.507457000  | -4.309008000 | -2.027634000 |
| 1  | 1.006047000  | -5.249560000 | -1.774895000 |
| 1  | 1.150358000  | -4.013393000 | -3.021654000 |
| 1  | 2.571550000  | -4.537071000 | -2.126379000 |
| 7  | -1.842776000 | -0.407529000 | -0.003511000 |
| 6  | -3.449998000 | -1.368928000 | -1.230400000 |
| 15 | -3.430958000 | -0.010120000 | -0.181437000 |
| 6  | -4.356529000 | -2.197739000 | -2.055505000 |
| 1  | -3.814374000 | -2.637999000 | -2.897502000 |
| 1  | -4.816427000 | -3.028815000 | -1.504832000 |
| 1  | -5.170816000 | -1.607498000 | -2.481657000 |
| 7  | -4.348384000 | -0.070699000 | 1.198070000  |
| 7  | -3.593192000 | 1.563094000  | -0.659025000 |
| 6  | -3.956848000 | 0.817814000  | 2.289681000  |
| 1  | -3.126798000 | 0.390804000  | 2.866850000  |
| 1  | -3.636961000 | 1.786215000  | 1.905844000  |
| 1  | -4.808842000 | 0.974434000  | 2.956403000  |
| 6  | -4.682583000 | -1.402214000 | 1.680866000  |
| 1  | -3.815438000 | -1.894276000 | 2.142738000  |
| 1  | -5.471109000 | -1.317915000 | 2.432490000  |

|   |              |              |              |
|---|--------------|--------------|--------------|
| 1 | -5.043771000 | -2.027494000 | 0.865982000  |
| 6 | -2.695550000 | 2.049352000  | -1.692177000 |
| 1 | -2.363150000 | 3.062743000  | -1.446832000 |
| 1 | -1.818184000 | 1.408433000  | -1.769480000 |
| 1 | -3.195055000 | 2.075114000  | -2.667493000 |
| 6 | -4.826432000 | 2.315292000  | -0.562670000 |
| 1 | -5.338443000 | 2.361681000  | -1.531586000 |
| 1 | -5.499804000 | 1.862811000  | 0.162424000  |
| 1 | -4.611543000 | 3.341779000  | -0.247428000 |
| 7 | 2.723876000  | -2.662287000 | 1.559618000  |
| 7 | 3.341079000  | -1.320400000 | -0.545722000 |
| 6 | 4.031740000  | -3.282410000 | 1.654796000  |
| 1 | 4.501663000  | -3.007494000 | 2.603897000  |
| 1 | 3.959028000  | -4.377081000 | 1.618348000  |
| 1 | 4.679018000  | -2.954261000 | 0.842879000  |
| 6 | 1.803551000  | -3.141040000 | 2.579186000  |
| 1 | 0.871198000  | -2.581734000 | 2.548164000  |
| 1 | 1.584598000  | -4.209331000 | 2.454489000  |
| 1 | 2.260314000  | -2.996770000 | 3.561459000  |
| 6 | 3.448754000  | -1.111428000 | -1.977991000 |
| 1 | 4.501599000  | -1.142153000 | -2.275066000 |
| 1 | 2.905116000  | -1.884451000 | -2.518402000 |
| 1 | 3.037980000  | -0.137669000 | -2.268704000 |
| 6 | 4.020082000  | -0.298002000 | 0.230105000  |
| 1 | 3.815498000  | -0.417163000 | 1.292994000  |
| 1 | 5.102213000  | -0.356898000 | 0.071790000  |
| 1 | 3.684755000  | 0.700796000  | -0.075156000 |
| 9 | -0.539647000 | -0.141020000 | 2.589415000  |
| 6 | 0.679197000  | 1.556773000  | 0.392116000  |
| 6 | 1.126877000  | 2.561588000  | 1.228760000  |
| 6 | 1.056658000  | 1.679043000  | -0.932594000 |
| 6 | 1.909332000  | 3.619980000  | 0.791860000  |
| 6 | 1.837539000  | 2.710725000  | -1.420775000 |
| 6 | 2.267825000  | 3.691204000  | -0.542699000 |
| 9 | 0.820617000  | 2.550316000  | 2.521285000  |
| 9 | 2.318408000  | 4.561726000  | 1.626221000  |
| 9 | 3.011267000  | 4.690497000  | -0.978200000 |
| 9 | 2.180324000  | 2.773799000  | -2.698965000 |
| 9 | 0.668082000  | 0.757614000  | -1.824133000 |

**1GaP<sup>C-F</sup>** (T.E = -3440.933475)

|   |              |              |             |
|---|--------------|--------------|-------------|
| 7 | 1.468222000  | -1.920937000 | 0.188441000 |
| 7 | -1.454610000 | -1.950887000 | 0.197420000 |
| 6 | 1.255966000  | -2.948818000 | 0.984844000 |
| 6 | -1.218206000 | -2.965044000 | 1.001817000 |
| 6 | 0.025526000  | -3.470710000 | 1.356141000 |
| 1 | 0.035853000  | -4.343520000 | 1.993321000 |
| 6 | 2.768317000  | -1.401157000 | 0.005209000 |

|    |              |              |              |
|----|--------------|--------------|--------------|
| 6  | 3.694738000  | -1.358926000 | 1.041704000  |
| 6  | 3.101769000  | -0.867590000 | -1.236284000 |
| 6  | 4.948881000  | -0.817178000 | 0.825645000  |
| 6  | 4.354057000  | -0.319217000 | -1.438993000 |
| 6  | 5.284531000  | -0.297155000 | -0.412896000 |
| 1  | 5.662304000  | -0.783051000 | 1.640752000  |
| 1  | 4.604979000  | 0.088857000  | -2.410796000 |
| 1  | 6.264791000  | 0.134501000  | -0.574622000 |
| 6  | -2.764408000 | -1.445483000 | 0.041427000  |
| 6  | -3.162013000 | -0.997353000 | -1.214170000 |
| 6  | -3.633050000 | -1.333380000 | 1.121409000  |
| 6  | -4.427420000 | -0.469219000 | -1.387530000 |
| 6  | -4.899903000 | -0.810067000 | 0.935591000  |
| 6  | -5.302821000 | -0.379729000 | -0.317306000 |
| 1  | -4.732690000 | -0.129072000 | -2.369940000 |
| 1  | -5.569562000 | -0.719431000 | 1.782794000  |
| 1  | -6.293018000 | 0.036865000  | -0.456767000 |
| 1  | -3.297360000 | -1.618444000 | 2.112549000  |
| 1  | -2.476111000 | -1.088375000 | -2.051529000 |
| 1  | 2.379205000  | -0.910336000 | -2.046845000 |
| 1  | 3.419334000  | -1.715791000 | 2.027747000  |
| 31 | -0.006743000 | -0.965340000 | -0.647850000 |
| 1  | -2.092703000 | -3.461844000 | 1.425037000  |
| 1  | 2.141875000  | -3.442031000 | 1.387394000  |
| 9  | -0.026344000 | -1.346607000 | -2.382377000 |
| 6  | -0.016221000 | 0.939359000  | -0.152683000 |
| 6  | 0.187983000  | 1.986570000  | -1.028486000 |
| 6  | -0.221116000 | 1.263205000  | 1.173694000  |
| 6  | 0.178153000  | 3.307336000  | -0.612529000 |
| 6  | -0.241077000 | 2.566888000  | 1.632172000  |
| 6  | -0.040052000 | 3.593622000  | 0.724714000  |
| 9  | 0.410212000  | 1.751801000  | -2.313240000 |
| 9  | 0.376014000  | 4.294235000  | -1.467040000 |
| 9  | -0.051459000 | 4.844803000  | 1.135655000  |
| 9  | -0.441762000 | 2.845633000  | 2.907594000  |
| 9  | -0.402329000 | 0.290854000  | 2.069751000  |

**4GaP<sup>C-F</sup>** (T.E = -3653.724408)

|   |              |              |              |
|---|--------------|--------------|--------------|
| 7 | 1.223031000  | 0.467112000  | -0.345315000 |
| 6 | 0.932428000  | 1.715590000  | -0.710937000 |
| 6 | -0.309329000 | 2.286518000  | -0.888911000 |
| 6 | -1.547276000 | 1.686049000  | -0.595226000 |
| 6 | -1.754334000 | 0.374108000  | -0.263458000 |
| 6 | 2.551624000  | 0.131534000  | -0.026270000 |
| 6 | 3.007283000  | -1.162591000 | -0.265469000 |
| 6 | 3.425705000  | 1.048896000  | 0.553882000  |
| 6 | 4.307109000  | -1.518367000 | 0.035933000  |
| 1 | 2.333981000  | -1.893678000 | -0.700623000 |

|    |              |              |              |
|----|--------------|--------------|--------------|
| 6  | 4.728356000  | 0.688331000  | 0.846387000  |
| 1  | 3.073115000  | 2.041137000  | 0.810239000  |
| 6  | 5.179804000  | -0.593926000 | 0.586189000  |
| 1  | 4.640876000  | -2.529992000 | -0.163747000 |
| 1  | 5.391286000  | 1.415560000  | 1.301388000  |
| 1  | 6.198506000  | -0.875380000 | 0.823827000  |
| 1  | 1.789087000  | 2.366318000  | -0.888415000 |
| 15 | -3.241808000 | -0.227732000 | 0.328487000  |
| 6  | -4.648316000 | 0.878721000  | 0.119789000  |
| 1  | -5.549012000 | 0.407370000  | 0.515959000  |
| 1  | -4.472829000 | 1.810728000  | 0.658192000  |
| 1  | -4.794038000 | 1.101774000  | -0.937750000 |
| 6  | -3.673073000 | -1.781826000 | -0.465036000 |
| 1  | -3.719262000 | -1.647139000 | -1.546206000 |
| 1  | -2.901027000 | -2.519898000 | -0.234884000 |
| 1  | -4.631545000 | -2.148734000 | -0.093987000 |
| 6  | -3.134168000 | -0.621076000 | 2.078848000  |
| 1  | -2.993215000 | 0.298576000  | 2.647951000  |
| 1  | -4.031954000 | -1.137529000 | 2.424119000  |
| 1  | -2.252431000 | -1.254131000 | 2.218066000  |
| 1  | -2.399735000 | 2.370870000  | -0.630638000 |
| 1  | -0.314073000 | 3.320517000  | -1.208881000 |
| 31 | -0.209863000 | -0.854203000 | -0.269708000 |
| 6  | -0.114289000 | -2.193553000 | -1.763700000 |
| 6  | -0.487701000 | -3.517847000 | -1.654818000 |
| 6  | 0.316063000  | -1.782679000 | -3.010187000 |
| 6  | -0.422931000 | -4.406029000 | -2.715516000 |
| 6  | 0.401314000  | -2.632155000 | -4.098963000 |
| 6  | 0.029304000  | -3.956683000 | -3.943971000 |
| 9  | -0.140091000 | -1.725858000 | 1.305073000  |
| 9  | -0.953833000 | -3.996014000 | -0.501787000 |
| 9  | -0.791761000 | -5.668612000 | -2.576366000 |
| 9  | 0.096404000  | -4.786132000 | -4.967111000 |
| 9  | 0.822696000  | -2.203489000 | -5.276245000 |
| 9  | 0.668632000  | -0.512323000 | -3.202425000 |

**6GaP<sup>C-F</sup>** (T.E = -3784.304418)

|    |             |              |              |
|----|-------------|--------------|--------------|
| 6  | 2.835584000 | -0.422939000 | 1.019827000  |
| 6  | 1.984500000 | -0.901279000 | 0.021157000  |
| 6  | 1.780036000 | 1.873353000  | 1.107545000  |
| 1  | 1.900768000 | 2.837757000  | 1.605560000  |
| 7  | 0.891513000 | 1.800054000  | 0.164994000  |
| 15 | 2.444669000 | -2.427805000 | -0.588865000 |
| 6  | 4.066212000 | -2.466840000 | -1.375017000 |
| 1  | 4.812547000 | -2.156082000 | -0.643909000 |
| 1  | 4.297696000 | -3.470846000 | -1.735912000 |
| 1  | 4.068607000 | -1.767214000 | -2.211574000 |
| 6  | 2.471257000 | -3.766993000 | 0.618508000  |



|    |              |              |              |
|----|--------------|--------------|--------------|
| 1  | 1.476421000  | -3.870923000 | 1.053589000  |
| 1  | 2.763090000  | -4.706942000 | 0.145943000  |
| 1  | 3.180154000  | -3.510231000 | 1.405342000  |
| 6  | 1.266465000  | -2.927690000 | -1.849845000 |
| 1  | 1.194285000  | -2.153755000 | -2.617558000 |
| 1  | 1.573499000  | -3.870760000 | -2.304251000 |
| 1  | 0.281038000  | -3.056167000 | -1.396999000 |
| 8  | 3.806583000  | -0.991950000 | 1.512051000  |
| 7  | 2.582395000  | 0.919199000  | 1.578458000  |
| 6  | 3.430297000  | 1.254742000  | 2.716119000  |
| 1  | 3.273869000  | 0.539761000  | 3.522477000  |
| 1  | 4.481904000  | 1.215618000  | 2.436408000  |
| 1  | 3.177113000  | 2.252863000  | 3.069132000  |
| 6  | 0.272449000  | 3.002330000  | -0.257933000 |
| 6  | -1.090448000 | 3.007015000  | -0.525613000 |
| 6  | 1.009381000  | 4.166374000  | -0.440301000 |
| 6  | -1.710585000 | 4.170749000  | -0.936819000 |
| 1  | -1.660709000 | 2.092992000  | -0.403870000 |
| 6  | 0.380382000  | 5.330027000  | -0.846708000 |
| 1  | 2.084801000  | 4.149450000  | -0.301037000 |
| 6  | -0.981061000 | 5.338358000  | -1.092267000 |
| 1  | -2.775140000 | 4.164013000  | -1.138445000 |
| 1  | 0.965476000  | 6.230735000  | -0.991029000 |
| 1  | -1.470450000 | 6.247679000  | -1.419470000 |
| 31 | 0.441751000  | 0.039460000  | -0.664777000 |
| 6  | -1.392118000 | -0.539730000 | -0.098810000 |
| 6  | -2.309913000 | -1.164763000 | -0.919305000 |
| 6  | -1.767349000 | -0.367421000 | 1.218545000  |
| 6  | -3.550280000 | -1.585511000 | -0.466703000 |
| 6  | -2.994067000 | -0.766933000 | 1.716262000  |
| 6  | -3.891747000 | -1.380833000 | 0.858931000  |
| 9  | 0.450965000  | 0.371927000  | -2.422251000 |
| 9  | -2.022493000 | -1.404564000 | -2.193860000 |
| 9  | -4.407723000 | -2.183408000 | -1.275995000 |
| 9  | -5.067229000 | -1.775955000 | 1.307010000  |
| 9  | -3.320328000 | -0.577861000 | 2.983480000  |
| 9  | -0.923556000 | 0.215928000  | 2.075020000  |

**8GaP<sup>C-F</sup>** (T.E = -4018.346988)

|    |              |              |              |
|----|--------------|--------------|--------------|
| 7  | -0.920291000 | -1.333530000 | 0.468617000  |
| 6  | -1.865655000 | -0.851224000 | 1.422550000  |
| 6  | -1.468209000 | 0.173638000  | 2.385058000  |
| 15 | -2.204470000 | -2.128205000 | -0.229182000 |
| 6  | -3.063050000 | -1.440347000 | 1.133743000  |
| 6  | -4.406918000 | -1.373137000 | 1.746383000  |
| 1  | -4.743166000 | -2.336269000 | 2.140902000  |
| 1  | -4.404037000 | -0.664737000 | 2.579038000  |
| 1  | -5.170269000 | -1.034639000 | 1.038599000  |

|    |              |              |              |
|----|--------------|--------------|--------------|
| 7  | -2.795369000 | -1.681945000 | -1.685690000 |
| 7  | -1.855155000 | -3.725479000 | -0.384641000 |
| 6  | -2.200335000 | -2.135184000 | -2.939173000 |
| 1  | -1.550208000 | -1.357348000 | -3.343606000 |
| 1  | -1.602378000 | -3.030756000 | -2.782752000 |
| 1  | -2.998113000 | -2.362394000 | -3.652334000 |
| 6  | -3.416380000 | -0.367213000 | -1.811734000 |
| 1  | -4.154306000 | -0.400750000 | -2.616837000 |
| 1  | -3.920036000 | -0.087708000 | -0.887213000 |
| 1  | -2.662573000 | 0.391938000  | -2.049313000 |
| 6  | -2.829925000 | -4.657235000 | -0.920002000 |
| 1  | -2.338758000 | -5.362767000 | -1.597353000 |
| 1  | -3.305080000 | -5.231492000 | -0.116260000 |
| 1  | -3.605953000 | -4.132310000 | -1.475359000 |
| 6  | -0.852388000 | -4.351581000 | 0.460451000  |
| 1  | -0.138421000 | -3.608950000 | 0.810730000  |
| 1  | -1.312401000 | -4.840259000 | 1.327289000  |
| 1  | -0.319473000 | -5.111405000 | -0.117824000 |
| 6  | -0.601401000 | 2.672376000  | -0.513496000 |
| 6  | -1.804661000 | 3.279517000  | -0.873368000 |
| 6  | 0.567751000  | 3.121826000  | -1.124825000 |
| 6  | -1.830256000 | 4.316071000  | -1.788255000 |
| 1  | -2.723473000 | 2.924588000  | -0.415947000 |
| 6  | 0.538232000  | 4.150229000  | -2.048669000 |
| 1  | 1.511435000  | 2.656380000  | -0.854218000 |
| 6  | -0.659678000 | 4.759940000  | -2.382275000 |
| 1  | -2.777767000 | 4.775665000  | -2.047810000 |
| 1  | 1.462567000  | 4.479387000  | -2.509762000 |
| 1  | -0.682364000 | 5.567470000  | -3.104078000 |
| 7  | -0.573383000 | 1.601661000  | 0.397032000  |
| 5  | -1.218556000 | 1.604604000  | 1.664721000  |
| 7  | -1.583736000 | 2.783709000  | 2.379501000  |
| 6  | -0.994283000 | 4.081670000  | 2.140776000  |
| 1  | -0.123356000 | 4.009390000  | 1.493141000  |
| 1  | -1.703343000 | 4.781183000  | 1.678095000  |
| 1  | -0.671680000 | 4.519385000  | 3.093442000  |
| 6  | -2.555917000 | 2.850669000  | 3.440872000  |
| 1  | -3.123182000 | 1.925987000  | 3.533965000  |
| 1  | -2.091112000 | 3.069742000  | 4.411911000  |
| 1  | -3.278090000 | 3.653198000  | 3.242765000  |
| 1  | -2.192892000 | 0.236550000  | 3.195538000  |
| 1  | -0.507035000 | -0.111014000 | 2.829464000  |
| 31 | 0.230379000  | 0.023332000  | -0.324464000 |
| 6  | 2.171837000  | -0.302605000 | -0.037646000 |
| 6  | 3.123639000  | -0.180432000 | -1.032111000 |
| 6  | 2.634762000  | -0.665845000 | 1.210059000  |
| 6  | 4.470010000  | -0.418282000 | -0.806842000 |
| 6  | 3.967548000  | -0.914635000 | 1.481863000  |
| 6  | 4.890609000  | -0.789277000 | 0.458244000  |

|   |              |              |              |
|---|--------------|--------------|--------------|
| 9 | -0.189857000 | -0.086781000 | -2.069682000 |
| 9 | 2.776010000  | 0.183325000  | -2.258081000 |
| 9 | 5.357351000  | -0.294441000 | -1.778805000 |
| 9 | 6.168342000  | -1.018711000 | 0.689619000  |
| 9 | 4.370457000  | -1.264120000 | 2.692219000  |
| 9 | 1.778481000  | -0.786586000 | 2.228613000  |

**10GaP<sup>C-F</sup>** (T.E = -4109.852349)

|    |              |              |              |
|----|--------------|--------------|--------------|
| 7  | 1.469666000  | -0.195551000 | -0.394645000 |
| 6  | 2.564081000  | 0.395604000  | -1.090311000 |
| 6  | 2.595232000  | 1.742065000  | -1.456830000 |
| 6  | 1.640756000  | 2.689828000  | -1.100087000 |
| 1  | 3.455650000  | 2.070143000  | -2.029345000 |
| 1  | 1.868418000  | 3.690963000  | -1.479078000 |
| 15 | 2.398980000  | -1.548696000 | -0.242129000 |
| 6  | 3.491308000  | -0.650521000 | -1.227003000 |
| 6  | 4.868471000  | -0.685745000 | -1.769513000 |
| 1  | 4.900664000  | -0.436188000 | -2.835234000 |
| 1  | 5.541707000  | 0.014855000  | -1.257989000 |
| 1  | 5.306791000  | -1.680611000 | -1.667255000 |
| 6  | 0.490187000  | 2.547448000  | -0.334159000 |
| 15 | -0.455457000 | 3.863531000  | 0.153987000  |
| 6  | -0.050624000 | 5.443881000  | -0.616682000 |
| 1  | -0.723192000 | 6.217436000  | -0.242744000 |
| 1  | 0.976160000  | 5.723544000  | -0.378537000 |
| 1  | -0.155686000 | 5.369006000  | -1.699552000 |
| 6  | -0.376826000 | 4.143925000  | 1.934391000  |
| 1  | -1.110909000 | 4.883213000  | 2.261538000  |
| 1  | -0.548844000 | 3.188579000  | 2.437890000  |
| 1  | 0.628389000  | 4.477034000  | 2.196243000  |
| 6  | -2.210300000 | 3.592363000  | -0.164583000 |
| 1  | -2.371518000 | 3.470807000  | -1.236180000 |
| 1  | -2.517471000 | 2.670114000  | 0.334694000  |
| 1  | -2.813109000 | 4.420053000  | 0.213838000  |
| 31 | 0.096686000  | 0.793283000  | 0.474127000  |
| 7  | 2.902612000  | -1.916358000 | 1.291844000  |
| 7  | 1.540327000  | -2.887091000 | -0.681619000 |
| 6  | 1.860535000  | -2.208672000 | 2.277548000  |
| 1  | 1.400376000  | -1.283225000 | 2.649232000  |
| 1  | 1.079189000  | -2.830420000 | 1.842028000  |
| 1  | 2.302915000  | -2.750620000 | 3.117201000  |
| 6  | 3.936435000  | -1.055053000 | 1.849511000  |
| 1  | 4.346440000  | -1.531708000 | 2.743074000  |
| 1  | 4.742142000  | -0.906776000 | 1.132236000  |
| 1  | 3.531408000  | -0.074696000 | 2.135056000  |
| 6  | 1.948860000  | -4.241897000 | -0.379837000 |
| 1  | 1.082258000  | -4.828994000 | -0.057089000 |
| 1  | 2.377509000  | -4.731795000 | -1.262438000 |

|   |              |              |              |
|---|--------------|--------------|--------------|
| 1 | 2.689899000  | -4.251983000 | 0.417289000  |
| 6 | 0.612365000  | -2.786891000 | -1.792614000 |
| 1 | 0.372323000  | -1.742969000 | -1.991470000 |
| 1 | 1.031647000  | -3.233098000 | -2.701682000 |
| 1 | -0.315574000 | -3.313528000 | -1.545585000 |
| 6 | -1.608932000 | -0.237336000 | 0.202769000  |
| 6 | -2.191820000 | -1.057333000 | 1.149607000  |
| 6 | -2.193909000 | -0.244824000 | -1.048447000 |
| 6 | -3.302476000 | -1.841696000 | 0.878640000  |
| 6 | -3.304148000 | -1.007212000 | -1.365294000 |
| 6 | -3.860793000 | -1.812760000 | -0.386958000 |
| 9 | 0.401058000  | 0.869952000  | 2.265664000  |
| 9 | -1.694228000 | -1.138817000 | 2.377181000  |
| 9 | -3.835052000 | -2.618677000 | 1.808065000  |
| 9 | -4.919671000 | -2.551274000 | -0.661108000 |
| 9 | -3.835881000 | -0.982621000 | -2.577208000 |
| 9 | -1.679153000 | 0.502384000  | -2.028360000 |

**11GaP<sup>C-F</sup>** (T.E = -4027.647336)

|    |              |              |              |
|----|--------------|--------------|--------------|
| 7  | 1.606055000  | 0.036643000  | -0.409172000 |
| 6  | 2.575796000  | 1.062040000  | -0.388627000 |
| 6  | 0.899669000  | 2.948154000  | -0.357033000 |
| 7  | -0.095289000 | 2.176519000  | 0.123578000  |
| 15 | 2.864896000  | -1.029035000 | -0.205274000 |
| 6  | 3.811989000  | 0.414127000  | -0.377398000 |
| 6  | 5.254927000  | 0.772103000  | -0.363365000 |
| 1  | 5.533083000  | 1.451705000  | -1.171381000 |
| 1  | 5.582741000  | 1.229622000  | 0.576661000  |
| 1  | 5.856454000  | -0.129861000 | -0.496491000 |
| 6  | -1.412041000 | 2.701356000  | 0.164673000  |
| 6  | -1.998905000 | 3.355499000  | -0.912577000 |
| 6  | -2.171449000 | 2.454129000  | 1.303401000  |
| 6  | -3.321403000 | 3.751795000  | -0.841636000 |
| 1  | -1.414557000 | 3.547297000  | -1.802689000 |
| 6  | -3.497217000 | 2.846264000  | 1.364739000  |
| 1  | -1.706980000 | 1.955806000  | 2.151420000  |
| 6  | -4.077896000 | 3.499320000  | 0.292083000  |
| 1  | -3.769161000 | 4.259056000  | -1.688654000 |
| 1  | -4.073739000 | 2.644182000  | 2.259949000  |
| 1  | -5.114729000 | 3.810601000  | 0.337322000  |
| 31 | 0.041277000  | 0.340458000  | 0.647884000  |
| 7  | 3.003257000  | -1.795937000 | 1.235910000  |
| 7  | 2.720237000  | -2.245357000 | -1.297829000 |
| 6  | 1.962742000  | -2.736914000 | 1.642399000  |
| 1  | 1.445347000  | -3.142736000 | 0.772726000  |
| 1  | 2.410482000  | -3.565714000 | 2.197580000  |
| 1  | 1.229643000  | -2.232727000 | 2.282255000  |
| 6  | 3.596059000  | -1.094999000 | 2.370089000  |

|   |              |              |              |
|---|--------------|--------------|--------------|
| 1 | 4.439416000  | -0.487943000 | 2.046199000  |
| 1 | 2.855705000  | -0.455725000 | 2.862661000  |
| 1 | 3.959424000  | -1.837742000 | 3.084419000  |
| 6 | 3.488911000  | -3.472383000 | -1.231455000 |
| 1 | 2.835320000  | -4.329236000 | -1.423503000 |
| 1 | 4.284478000  | -3.477933000 | -1.984896000 |
| 1 | 3.939353000  | -3.594528000 | -0.248299000 |
| 6 | 2.153323000  | -1.977036000 | -2.609666000 |
| 1 | 1.574023000  | -1.055980000 | -2.591527000 |
| 1 | 2.938911000  | -1.893823000 | -3.368551000 |
| 1 | 1.488189000  | -2.798296000 | -2.891626000 |
| 8 | 0.807162000  | 4.095484000  | -0.720802000 |
| 7 | 2.238619000  | 2.363394000  | -0.370430000 |
| 6 | 3.332548000  | 3.318977000  | -0.491889000 |
| 1 | 4.090892000  | 3.112243000  | 0.262421000  |
| 1 | 3.786212000  | 3.272595000  | -1.484004000 |
| 1 | 2.932026000  | 4.316171000  | -0.345730000 |
| 6 | -1.492027000 | -0.803085000 | 0.180587000  |
| 6 | -2.223358000 | -1.530219000 | 1.098488000  |
| 6 | -1.907172000 | -0.862757000 | -1.135521000 |
| 6 | -3.319864000 | -2.293183000 | 0.734573000  |
| 6 | -2.996109000 | -1.611982000 | -1.542861000 |
| 6 | -3.704250000 | -2.331293000 | -0.595058000 |
| 9 | 0.614023000  | 0.187256000  | 2.344441000  |
| 9 | -1.893003000 | -1.512739000 | 2.383065000  |
| 9 | -4.002285000 | -2.981989000 | 1.631969000  |
| 9 | -4.743904000 | -3.054149000 | -0.959168000 |
| 9 | -3.367322000 | -1.652628000 | -2.810196000 |
| 9 | -1.253384000 | -0.175472000 | -2.069798000 |

**$^{13}\text{GaP}^{\text{C-F}}$  (T.E = -4353.195342)**

|    |              |              |              |
|----|--------------|--------------|--------------|
| 7  | -1.397315000 | -1.005418000 | -0.563482000 |
| 6  | -1.231515000 | -2.408325000 | -0.850864000 |
| 6  | -0.001011000 | -3.033939000 | -1.017690000 |
| 6  | 1.229953000  | -2.409223000 | -0.851160000 |
| 1  | -0.001426000 | -4.104428000 | -1.195299000 |
| 15 | -2.966504000 | -1.369200000 | -0.190817000 |
| 6  | -2.538612000 | -2.916809000 | -0.799726000 |
| 6  | -3.052640000 | -4.300439000 | -0.916510000 |
| 1  | -2.955237000 | -4.699453000 | -1.931345000 |
| 1  | -2.525980000 | -4.994695000 | -0.248625000 |
| 1  | -4.112494000 | -4.350829000 | -0.658247000 |
| 7  | 1.396736000  | -1.006620000 | -0.562803000 |
| 6  | 2.536798000  | -2.918499000 | -0.800779000 |
| 15 | 2.965820000  | -1.371562000 | -0.190963000 |
| 6  | 3.050005000  | -4.302382000 | -0.918175000 |
| 1  | 2.522783000  | -4.996650000 | -0.250739000 |
| 1  | 2.952617000  | -4.700849000 | -1.933227000 |

|    |              |              |              |
|----|--------------|--------------|--------------|
| 1  | 4.109765000  | -4.353514000 | -0.659678000 |
| 7  | 3.984794000  | -0.268912000 | -0.877906000 |
| 7  | 3.380322000  | -1.305646000 | 1.409939000  |
| 6  | 3.668692000  | 0.232770000  | -2.203327000 |
| 1  | 4.236355000  | -0.298223000 | -2.976557000 |
| 1  | 2.604487000  | 0.119586000  | -2.404844000 |
| 1  | 3.922340000  | 1.295769000  | -2.260452000 |
| 6  | 5.384689000  | -0.151331000 | -0.529026000 |
| 1  | 6.021914000  | -0.637314000 | -1.277818000 |
| 1  | 5.668977000  | 0.905278000  | -0.481442000 |
| 1  | 5.580140000  | -0.606309000 | 0.440318000  |
| 6  | 3.318293000  | -0.014496000 | 2.089015000  |
| 1  | 4.032828000  | 0.000030000  | 2.916878000  |
| 1  | 3.568591000  | 0.796056000  | 1.404684000  |
| 1  | 2.311950000  | 0.161979000  | 2.491110000  |
| 6  | 2.902286000  | -2.387667000 | 2.263414000  |
| 1  | 1.839208000  | -2.261522000 | 2.505812000  |
| 1  | 3.045461000  | -3.350725000 | 1.776241000  |
| 1  | 3.476982000  | -2.379145000 | 3.193017000  |
| 7  | -3.984696000 | -0.266103000 | -0.878332000 |
| 7  | -3.381001000 | -1.301970000 | 1.409953000  |
| 6  | -5.385062000 | -0.149586000 | -0.530940000 |
| 1  | -5.670423000 | 0.906789000  | -0.484867000 |
| 1  | -6.021094000 | -0.637086000 | -1.279774000 |
| 1  | -5.580985000 | -0.603609000 | 0.438760000  |
| 6  | -3.667706000 | 0.235816000  | -2.203461000 |
| 1  | -2.603277000 | 0.123177000  | -2.404085000 |
| 1  | -4.234456000 | -0.295371000 | -2.977240000 |
| 1  | -3.921838000 | 1.298692000  | -2.260695000 |
| 6  | -2.905326000 | -2.384031000 | 2.264613000  |
| 1  | -3.482655000 | -2.375827000 | 3.192606000  |
| 1  | -3.046896000 | -3.347007000 | 1.776816000  |
| 1  | -1.842949000 | -2.257777000 | 2.509962000  |
| 6  | -3.318785000 | -0.010502000 | 2.088328000  |
| 1  | -3.568857000 | 0.799706000  | 1.403514000  |
| 1  | -4.033434000 | 0.004590000  | 2.916089000  |
| 1  | -2.312453000 | 0.165956000  | 2.490478000  |
| 31 | -0.000098000 | -0.081727000 | 0.326350000  |
| 6  | 0.000848000  | 1.889971000  | 0.145567000  |
| 6  | 0.001632000  | 2.779229000  | 1.202371000  |
| 6  | 0.000539000  | 2.437574000  | -1.122858000 |
| 6  | 0.002096000  | 4.152229000  | 1.018504000  |
| 6  | 0.000957000  | 3.801756000  | -1.352994000 |
| 6  | 0.001748000  | 4.662130000  | -0.268378000 |
| 9  | -0.001394000 | -0.601875000 | 2.066924000  |
| 9  | 0.002098000  | 2.339925000  | 2.454335000  |
| 9  | 0.002874000  | 4.980625000  | 2.048836000  |
| 9  | 0.002173000  | 5.966337000  | -0.461246000 |
| 9  | -0.000321000 | 1.641356000  | -2.190293000 |

9 0.000592000 4.293064000 -2.580626000

Cartesian coordinates of the B–H splitting products obtained for some of the representative Al(I)/Ga(I) carbenoids and also their total energies (in hartrees) including the zero point vibrational correction that have been calculated at **M06-D3/Def2-TZVP** level of theory.

**1AIP<sup>B-H</sup>** (T.E = -1342.474048)

|    |              |              |              |
|----|--------------|--------------|--------------|
| 7  | -1.408979000 | -1.723141000 | -0.510022000 |
| 6  | -1.191212000 | -2.358236000 | -1.642728000 |
| 6  | 0.045939000  | -2.597973000 | -2.225324000 |
| 7  | 1.451768000  | -1.694952000 | -0.483304000 |
| 1  | 0.059793000  | -3.095897000 | -3.184313000 |
| 1  | -2.068737000 | -2.736472000 | -2.170793000 |
| 6  | -2.718249000 | -1.721661000 | 0.024013000  |
| 6  | -3.221081000 | -0.554734000 | 0.590429000  |
| 6  | -3.498213000 | -2.873842000 | 0.027567000  |
| 6  | -4.493096000 | -0.542814000 | 1.132283000  |
| 1  | -2.627167000 | 0.354219000  | 0.568490000  |
| 6  | -4.771917000 | -2.850570000 | 0.565974000  |
| 1  | -3.087952000 | -3.798332000 | -0.363753000 |
| 6  | -5.275323000 | -1.685842000 | 1.120020000  |
| 1  | -4.878570000 | 0.374396000  | 1.562304000  |
| 1  | -5.367918000 | -3.755930000 | 0.567970000  |
| 1  | -6.270383000 | -1.671557000 | 1.548380000  |
| 6  | 2.750988000  | -1.668603000 | 0.073844000  |
| 6  | 3.216386000  | -0.497028000 | 0.662607000  |
| 6  | 3.558212000  | -2.801982000 | 0.078069000  |
| 6  | 4.478750000  | -0.461508000 | 1.225843000  |
| 1  | 2.602396000  | 0.398590000  | 0.642622000  |
| 6  | 4.821950000  | -2.754968000 | 0.637846000  |
| 1  | 3.176751000  | -3.731680000 | -0.329626000 |
| 6  | 5.288371000  | -1.585227000 | 1.213295000  |
| 1  | 4.834345000  | 0.459354000  | 1.673309000  |
| 1  | 5.439059000  | -3.646093000 | 0.639757000  |
| 1  | 6.275613000  | -1.552335000 | 1.658388000  |
| 6  | 1.266987000  | -2.332285000 | -1.620856000 |
| 1  | 2.161266000  | -2.690668000 | -2.134410000 |
| 13 | 0.003335000  | -0.838480000 | 0.483688000  |
| 1  | -0.005852000 | -1.366682000 | 1.978988000  |
| 6  | 0.721742000  | 3.378675000  | -0.393987000 |
| 6  | -0.786118000 | 3.423616000  | -0.031705000 |

|   |              |             |              |
|---|--------------|-------------|--------------|
| 5 | -0.014709000 | 1.275330000 | 0.122916000  |
| 8 | 1.107931000  | 2.076332000 | 0.081366000  |
| 8 | -1.150355000 | 2.031950000 | -0.081587000 |
| 6 | 1.571042000  | 4.427478000 | 0.282169000  |
| 1 | 2.609806000  | 4.318775000 | -0.035589000 |
| 1 | 1.235842000  | 5.430823000 | 0.004012000  |
| 1 | 1.538786000  | 4.337196000 | 1.367405000  |
| 6 | 0.979018000  | 3.392231000 | -1.889907000 |
| 1 | 0.783429000  | 4.374696000 | -2.325299000 |
| 1 | 2.026732000  | 3.141956000 | -2.065443000 |
| 1 | 0.364527000  | 2.651367000 | -2.405478000 |
| 6 | -1.047238000 | 3.894315000 | 1.387493000  |
| 1 | -0.866721000 | 4.965816000 | 1.498157000  |
| 1 | -2.092140000 | 3.696908000 | 1.633874000  |
| 1 | -0.424571000 | 3.357279000 | 2.105852000  |
| 6 | -1.649728000 | 4.198982000 | -0.996811000 |
| 1 | -2.687567000 | 4.178145000 | -0.658930000 |
| 1 | -1.330083000 | 5.244036000 | -1.043224000 |
| 1 | -1.613885000 | 3.777929000 | -2.000930000 |

**4AIP<sup>B-H</sup>** (T.E = -1555.255910)

|    |              |              |              |
|----|--------------|--------------|--------------|
| 7  | 0.187430000  | -2.344202000 | 0.047179000  |
| 6  | -0.437848000 | -3.234267000 | -0.723255000 |
| 6  | -1.762907000 | -3.230857000 | -1.094446000 |
| 6  | -2.689184000 | -2.206817000 | -0.805197000 |
| 6  | -2.458863000 | -1.099461000 | -0.033005000 |
| 6  | 1.588336000  | -2.381720000 | 0.141420000  |
| 6  | 2.193277000  | -2.031293000 | 1.347335000  |
| 6  | 2.398999000  | -2.674676000 | -0.953168000 |
| 6  | 3.569574000  | -1.973275000 | 1.452926000  |
| 1  | 1.566413000  | -1.811439000 | 2.206628000  |
| 6  | 3.775838000  | -2.620864000 | -0.839129000 |
| 1  | 1.942240000  | -2.893749000 | -1.911730000 |
| 6  | 4.370565000  | -2.266988000 | 0.361001000  |
| 1  | 4.020672000  | -1.698344000 | 2.399783000  |
| 1  | 4.390888000  | -2.838267000 | -1.705330000 |
| 1  | 5.449823000  | -2.216836000 | 0.443247000  |
| 1  | 0.172987000  | -4.059499000 | -1.094962000 |
| 15 | -3.641002000 | 0.117316000  | 0.145326000  |
| 6  | -5.291105000 | -0.279206000 | -0.470769000 |
| 1  | -5.968230000 | 0.553967000  | -0.276125000 |
| 1  | -5.254675000 | -0.460990000 | -1.545566000 |
| 1  | -5.668680000 | -1.173855000 | 0.025515000  |
| 6  | -3.836794000 | 0.570757000  | 1.876230000  |
| 1  | -4.140734000 | -0.302573000 | 2.453955000  |
| 1  | -2.870768000 | 0.910739000  | 2.257778000  |
| 1  | -4.570417000 | 1.370971000  | 1.989198000  |
| 6  | -3.173069000 | 1.661889000  | -0.656991000 |



|    |              |              |              |
|----|--------------|--------------|--------------|
| 1  | -3.036633000 | 1.490139000  | -1.725677000 |
| 1  | -3.935986000 | 2.427440000  | -0.499881000 |
| 1  | -2.222830000 | 2.001028000  | -0.232656000 |
| 1  | -3.668056000 | -2.350001000 | -1.275341000 |
| 1  | -2.098367000 | -4.063974000 | -1.699057000 |
| 13 | -0.704376000 | -0.874070000 | 0.912508000  |
| 1  | -0.873869000 | -1.090013000 | 2.496130000  |
| 6  | 0.899945000  | 3.074741000  | -0.153282000 |
| 6  | 2.140451000  | 2.161915000  | -0.338266000 |
| 5  | 0.363240000  | 0.900314000  | 0.343372000  |
| 8  | 0.000870000  | 2.220877000  | 0.577699000  |
| 8  | 1.552806000  | 0.855580000  | -0.352354000 |
| 6  | 0.214142000  | 3.418988000  | -1.463706000 |
| 1  | -0.748593000 | 3.886700000  | -1.244090000 |
| 1  | 0.802461000  | 4.120835000  | -2.058902000 |
| 1  | 0.030095000  | 2.522257000  | -2.060538000 |
| 6  | 1.148572000  | 4.334020000  | 0.641081000  |
| 1  | 1.899859000  | 4.957699000  | 0.147707000  |
| 1  | 0.225352000  | 4.912683000  | 0.715444000  |
| 1  | 1.489422000  | 4.111724000  | 1.651606000  |
| 6  | 2.908443000  | 2.374679000  | -1.620817000 |
| 1  | 3.303761000  | 3.393587000  | -1.672433000 |
| 1  | 3.750851000  | 1.680856000  | -1.656505000 |
| 1  | 2.288813000  | 2.193664000  | -2.498667000 |
| 6  | 3.094694000  | 2.196367000  | 0.843144000  |
| 1  | 3.801960000  | 1.371426000  | 0.735783000  |
| 1  | 3.656130000  | 3.132566000  | 0.889029000  |
| 1  | 2.562023000  | 2.057031000  | 1.786675000  |

**6AIP<sup>B-H</sup>** (T.E = -1685.836942)

|    |              |              |              |
|----|--------------|--------------|--------------|
| 6  | -2.686001000 | 1.404570000  | 0.547378000  |
| 6  | -2.182793000 | 0.470121000  | -0.357544000 |
| 6  | -0.587846000 | 2.809323000  | 0.503963000  |
| 1  | -0.153613000 | 3.709220000  | 0.946848000  |
| 13 | -0.428695000 | 0.492769000  | -1.230961000 |
| 7  | 0.170728000  | 2.098298000  | -0.272601000 |
| 15 | -3.228370000 | -0.867884000 | -0.513557000 |
| 6  | -3.450424000 | -1.842118000 | 0.991791000  |
| 1  | -3.840863000 | -1.191617000 | 1.774268000  |
| 1  | -4.136165000 | -2.675348000 | 0.824851000  |
| 1  | -2.475083000 | -2.228388000 | 1.295459000  |
| 6  | -4.901424000 | -0.497062000 | -1.083712000 |
| 1  | -4.843069000 | -0.021876000 | -2.063717000 |
| 1  | -5.494656000 | -1.410923000 | -1.156613000 |
| 1  | -5.361899000 | 0.193241000  | -0.377787000 |
| 6  | -2.563961000 | -2.029256000 | -1.715418000 |
| 1  | -1.596181000 | -2.409097000 | -1.373692000 |
| 1  | -3.254264000 | -2.864473000 | -1.846491000 |

|   |              |              |              |
|---|--------------|--------------|--------------|
| 1 | -2.424962000 | -1.526054000 | -2.674512000 |
| 8 | -3.752213000 | 1.391516000  | 1.164119000  |
| 7 | -1.856291000 | 2.597686000  | 0.843291000  |
| 6 | -2.506932000 | 3.585036000  | 1.691534000  |
| 1 | -3.419653000 | 3.945653000  | 1.218711000  |
| 1 | -2.783956000 | 3.146002000  | 2.649026000  |
| 1 | -1.830325000 | 4.423226000  | 1.852141000  |
| 6 | 1.541366000  | 2.450229000  | -0.353457000 |
| 6 | 2.169702000  | 2.419999000  | -1.592581000 |
| 6 | 2.282080000  | 2.751094000  | 0.783142000  |
| 6 | 3.516936000  | 2.712989000  | -1.691518000 |
| 1 | 1.586518000  | 2.166820000  | -2.471977000 |
| 6 | 3.628487000  | 3.049921000  | 0.675259000  |
| 1 | 1.810997000  | 2.700580000  | 1.758685000  |
| 6 | 4.250739000  | 3.034416000  | -0.561105000 |
| 1 | 3.997195000  | 2.690871000  | -2.662817000 |
| 1 | 4.198954000  | 3.275422000  | 1.568851000  |
| 1 | 5.307554000  | 3.259094000  | -0.642156000 |
| 1 | -0.403389000 | 0.808471000  | -2.801794000 |
| 6 | 1.399831000  | -3.152421000 | 0.279607000  |
| 6 | 2.513030000  | -2.135639000 | 0.641933000  |
| 5 | 0.835165000  | -1.072642000 | -0.494691000 |
| 8 | 0.641506000  | -2.431478000 | -0.704342000 |
| 8 | 1.861306000  | -0.879296000 | 0.408364000  |
| 6 | 0.452339000  | -3.436580000 | 1.432703000  |
| 1 | -0.411339000 | -3.982327000 | 1.044095000  |
| 1 | 0.919633000  | -4.046896000 | 2.208794000  |
| 1 | 0.093491000  | -2.508112000 | 1.884743000  |
| 6 | 1.889416000  | -4.450944000 | -0.314086000 |
| 1 | 2.543986000  | -4.973376000 | 0.389754000  |
| 1 | 1.039245000  | -5.101163000 | -0.530630000 |
| 1 | 2.434609000  | -4.289195000 | -1.243296000 |
| 6 | 2.985436000  | -2.191227000 | 2.075098000  |
| 1 | 3.408770000  | -3.173413000 | 2.305457000  |
| 1 | 3.764021000  | -1.441786000 | 2.231176000  |
| 1 | 2.176388000  | -1.985930000 | 2.775648000  |
| 6 | 3.705672000  | -2.194573000 | -0.295878000 |
| 1 | 4.330277000  | -1.317364000 | -0.116006000 |
| 1 | 4.311536000  | -3.088450000 | -0.129629000 |
| 1 | 3.389253000  | -2.172446000 | -1.340688000 |

**8AIP<sup>B-H</sup>** (T.E = -1919.889483)

|    |              |              |             |
|----|--------------|--------------|-------------|
| 7  | -1.300553000 | -1.331173000 | 0.027205000 |
| 6  | -1.360046000 | -0.903675000 | 1.385743000 |
| 6  | -0.129945000 | -0.499802000 | 2.065229000 |
| 15 | -2.950102000 | -1.198093000 | 0.045860000 |
| 6  | -2.680799000 | -0.819823000 | 1.732542000 |
| 6  | -3.389684000 | -0.435532000 | 2.971902000 |

|    |              |              |              |
|----|--------------|--------------|--------------|
| 1  | -4.020593000 | -1.238199000 | 3.364345000  |
| 1  | -2.667982000 | -0.181617000 | 3.752225000  |
| 1  | -4.035224000 | 0.438107000  | 2.834418000  |
| 7  | -3.693553000 | -0.002043000 | -0.795007000 |
| 7  | -3.642427000 | -2.580357000 | -0.515670000 |
| 6  | -3.894238000 | -0.090821000 | -2.235441000 |
| 1  | -3.135540000 | 0.497629000  | -2.760732000 |
| 1  | -3.814272000 | -1.121271000 | -2.577155000 |
| 1  | -4.887869000 | 0.291747000  | -2.489032000 |
| 6  | -3.614692000 | 1.377591000  | -0.331756000 |
| 1  | -4.541607000 | 1.895244000  | -0.593217000 |
| 1  | -3.479201000 | 1.418407000  | 0.747413000  |
| 1  | -2.774927000 | 1.905630000  | -0.798788000 |
| 6  | -5.079777000 | -2.720454000 | -0.637494000 |
| 1  | -5.326402000 | -3.234103000 | -1.572259000 |
| 1  | -5.489321000 | -3.309762000 | 0.191326000  |
| 1  | -5.566248000 | -1.746178000 | -0.642331000 |
| 6  | -2.939336000 | -3.846531000 | -0.402941000 |
| 1  | -1.867383000 | -3.674012000 | -0.332913000 |
| 1  | -3.270571000 | -4.406975000 | 0.479248000  |
| 1  | -3.143450000 | -4.453212000 | -1.289802000 |
| 13 | -0.084058000 | -0.326972000 | -1.072910000 |
| 6  | -0.113133000 | 2.493536000  | -0.397488000 |
| 6  | -0.641033000 | 3.512206000  | 0.408494000  |
| 6  | 0.223802000  | 2.830899000  | -1.714036000 |
| 6  | -0.818303000 | 4.793960000  | -0.075516000 |
| 1  | -0.923437000 | 3.268891000  | 1.429317000  |
| 6  | 0.035444000  | 4.113562000  | -2.196014000 |
| 1  | 0.654594000  | 2.069944000  | -2.358226000 |
| 6  | -0.486220000 | 5.108138000  | -1.384759000 |
| 1  | -1.231625000 | 5.556218000  | 0.576630000  |
| 1  | 0.310176000  | 4.339128000  | -3.220793000 |
| 1  | -0.630196000 | 6.112216000  | -1.765061000 |
| 7  | 0.006264000  | 1.195754000  | 0.075419000  |
| 5  | 0.457775000  | 0.858157000  | 1.388622000  |
| 7  | 1.471851000  | 1.564616000  | 2.094230000  |
| 6  | 2.318976000  | 2.553505000  | 1.465861000  |
| 1  | 2.233098000  | 2.510301000  | 0.381184000  |
| 1  | 2.078591000  | 3.574536000  | 1.789245000  |
| 1  | 3.367130000  | 2.361033000  | 1.729161000  |
| 6  | 1.847589000  | 1.348081000  | 3.467259000  |
| 1  | 1.186925000  | 0.639571000  | 3.962352000  |
| 1  | 2.873207000  | 0.960325000  | 3.542677000  |
| 1  | 1.816164000  | 2.287409000  | 4.034408000  |
| 1  | -0.315187000 | -0.368256000 | 3.132930000  |
| 1  | 0.630565000  | -1.283900000 | 1.946912000  |
| 1  | -0.861628000 | -0.059689000 | -2.444716000 |
| 6  | 3.740334000  | -1.900905000 | 0.140884000  |
| 6  | 4.189048000  | -1.112099000 | -1.118250000 |

|   |             |              |              |
|---|-------------|--------------|--------------|
| 5 | 1.905193000 | -1.090526000 | -0.952017000 |
| 8 | 2.986901000 | -0.422024000 | -1.489294000 |
| 8 | 2.338104000 | -2.094938000 | -0.101829000 |
| 6 | 3.850322000 | -1.090212000 | 1.421563000  |
| 1 | 3.341147000 | -1.632074000 | 2.222646000  |
| 1 | 4.889415000 | -0.936312000 | 1.721582000  |
| 1 | 3.361791000 | -0.117549000 | 1.314191000  |
| 6 | 4.408143000 | -3.242281000 | 0.325776000  |
| 1 | 5.490362000 | -3.122606000 | 0.432905000  |
| 1 | 4.029317000 | -3.718276000 | 1.232483000  |
| 1 | 4.212387000 | -3.910462000 | -0.512231000 |
| 6 | 5.282706000 | -0.098382000 | -0.877018000 |
| 1 | 6.186860000 | -0.585266000 | -0.499526000 |
| 1 | 5.533113000 | 0.399738000  | -1.815622000 |
| 1 | 4.972092000 | 0.666165000  | -0.164492000 |
| 6 | 4.564905000 | -2.009218000 | -2.283575000 |
| 1 | 4.658437000 | -1.393803000 | -3.180100000 |
| 1 | 5.517252000 | -2.517363000 | -2.114388000 |
| 1 | 3.794001000 | -2.759825000 | -2.469344000 |

**10AIP<sup>B-H</sup>** (T.E = -2011.382726)

|    |              |              |              |
|----|--------------|--------------|--------------|
| 7  | 1.532834000  | 0.509796000  | -0.019459000 |
| 6  | 2.303320000  | 1.537715000  | -0.651889000 |
| 6  | 1.780810000  | 2.794941000  | -0.943003000 |
| 6  | 0.463872000  | 3.179294000  | -0.681385000 |
| 1  | 2.434290000  | 3.494515000  | -1.452329000 |
| 1  | 0.214860000  | 4.161318000  | -1.101113000 |
| 15 | 2.892574000  | -0.410240000 | -0.051935000 |
| 6  | 3.560097000  | 0.944815000  | -0.873547000 |
| 6  | 4.811927000  | 1.456188000  | -1.473528000 |
| 1  | 4.589796000  | 2.174930000  | -2.268133000 |
| 1  | 5.469122000  | 1.969236000  | -0.758149000 |
| 1  | 5.401938000  | 0.657372000  | -1.929708000 |
| 6  | -0.512224000 | 2.494691000  | 0.029898000  |
| 15 | -2.107356000 | 3.057798000  | 0.057752000  |
| 6  | -2.330279000 | 4.836023000  | -0.202251000 |
| 1  | -3.387611000 | 5.096253000  | -0.129357000 |
| 1  | -1.765312000 | 5.390487000  | 0.547664000  |
| 1  | -1.968326000 | 5.117217000  | -1.192032000 |
| 6  | -2.908356000 | 2.669149000  | 1.622988000  |
| 1  | -3.925918000 | 3.063889000  | 1.644702000  |
| 1  | -2.949921000 | 1.581346000  | 1.726885000  |
| 1  | -2.327706000 | 3.082911000  | 2.447797000  |
| 6  | -3.204140000 | 2.293036000  | -1.165097000 |
| 1  | -2.821687000 | 2.495290000  | -2.166510000 |
| 1  | -3.199949000 | 1.214383000  | -0.987988000 |
| 1  | -4.225951000 | 2.670251000  | -1.077301000 |
| 7  | 3.546479000  | -0.805454000 | 1.423815000  |

|    |              |              |              |
|----|--------------|--------------|--------------|
| 7  | 2.585772000  | -1.895320000 | -0.708782000 |
| 6  | 2.725454000  | -1.615827000 | 2.317059000  |
| 1  | 2.010668000  | -0.989816000 | 2.868513000  |
| 1  | 2.160825000  | -2.359970000 | 1.755697000  |
| 1  | 3.366350000  | -2.133470000 | 3.036603000  |
| 6  | 4.220690000  | 0.269280000  | 2.135542000  |
| 1  | 4.814838000  | -0.160346000 | 2.946382000  |
| 1  | 4.884922000  | 0.813734000  | 1.466318000  |
| 1  | 3.503035000  | 0.978951000  | 2.569590000  |
| 6  | 3.488352000  | -3.019993000 | -0.614538000 |
| 1  | 2.923359000  | -3.934369000 | -0.400727000 |
| 1  | 4.031664000  | -3.173954000 | -1.555395000 |
| 1  | 4.213619000  | -2.867330000 | 0.182802000  |
| 6  | 1.643309000  | -1.992070000 | -1.806177000 |
| 1  | 0.994113000  | -1.117284000 | -1.822158000 |
| 1  | 2.162274000  | -2.076913000 | -2.768839000 |
| 1  | 1.010012000  | -2.873801000 | -1.664072000 |
| 13 | -0.041944000 | 0.785361000  | 0.958449000  |
| 1  | 0.255385000  | 0.979942000  | 2.534730000  |
| 6  | -2.262744000 | -2.673651000 | -0.513483000 |
| 6  | -3.399654000 | -1.958420000 | 0.259148000  |
| 5  | -1.425637000 | -0.803056000 | 0.508424000  |
| 8  | -2.812089000 | -0.675487000 | 0.529611000  |
| 8  | -1.089031000 | -2.062012000 | 0.039177000  |
| 6  | -4.678909000 | -1.763118000 | -0.519455000 |
| 1  | -5.104351000 | -2.727114000 | -0.813401000 |
| 1  | -5.412244000 | -1.247355000 | 0.104218000  |
| 1  | -4.521103000 | -1.166554000 | -1.418120000 |
| 6  | -3.706381000 | -2.600750000 | 1.599798000  |
| 1  | -4.348383000 | -1.927752000 | 2.171205000  |
| 1  | -4.227498000 | -3.553896000 | 1.483120000  |
| 1  | -2.794472000 | -2.766414000 | 2.176635000  |
| 6  | -2.190713000 | -4.167724000 | -0.308710000 |
| 1  | -3.110822000 | -4.651364000 | -0.649923000 |
| 1  | -1.359809000 | -4.576393000 | -0.888427000 |
| 1  | -2.028222000 | -4.424049000 | 0.737646000  |
| 6  | -2.265531000 | -2.357539000 | -2.000148000 |
| 1  | -1.337693000 | -2.729400000 | -2.439159000 |
| 1  | -3.101742000 | -2.832483000 | -2.518352000 |
| 1  | -2.307196000 | -1.279186000 | -2.175193000 |

**11AIP<sup>B-H</sup> (T.E = -1929.191930)**

|    |             |              |              |
|----|-------------|--------------|--------------|
| 7  | 1.560599000 | 0.193184000  | 0.143738000  |
| 6  | 2.412567000 | 1.255284000  | -0.195510000 |
| 6  | 0.589651000 | 2.969454000  | -0.122774000 |
| 15 | 2.851991000 | -0.804233000 | -0.078872000 |
| 6  | 3.642533000 | 0.674665000  | -0.523218000 |
| 6  | 4.974574000 | 1.108452000  | -1.017272000 |

|    |              |              |              |
|----|--------------|--------------|--------------|
| 1  | 4.906354000  | 1.830182000  | -1.834261000 |
| 1  | 5.608674000  | 1.554319000  | -0.241313000 |
| 1  | 5.522328000  | 0.248488000  | -1.409618000 |
| 7  | 3.449525000  | -1.568670000 | 1.254487000  |
| 7  | 2.448155000  | -2.033492000 | -1.088288000 |
| 6  | 2.584468000  | -2.532875000 | 1.926662000  |
| 1  | 1.924648000  | -2.030192000 | 2.645849000  |
| 1  | 1.964307000  | -3.064401000 | 1.205169000  |
| 1  | 3.195862000  | -3.261689000 | 2.464670000  |
| 6  | 4.236726000  | -0.780810000 | 2.192562000  |
| 1  | 4.792509000  | -1.460496000 | 2.842731000  |
| 1  | 4.947090000  | -0.149896000 | 1.661109000  |
| 1  | 3.599113000  | -0.143642000 | 2.818715000  |
| 6  | 3.320889000  | -3.165244000 | -1.327299000 |
| 1  | 2.729932000  | -4.086237000 | -1.354454000 |
| 1  | 3.839839000  | -3.068988000 | -2.288158000 |
| 1  | 4.064253000  | -3.255330000 | -0.536715000 |
| 6  | 1.461771000  | -1.815827000 | -2.136926000 |
| 1  | 0.776471000  | -1.017374000 | -1.858825000 |
| 1  | 1.944985000  | -1.578338000 | -3.091431000 |
| 1  | 0.869810000  | -2.726761000 | -2.261544000 |
| 7  | 1.984179000  | 2.527682000  | -0.145535000 |
| 6  | 2.941925000  | 3.578492000  | -0.454549000 |
| 1  | 3.916490000  | 3.296328000  | -0.061511000 |
| 1  | 3.016782000  | 3.757775000  | -1.529488000 |
| 1  | 2.616309000  | 4.502303000  | 0.014227000  |
| 8  | 0.385245000  | 4.070560000  | -0.580087000 |
| 7  | -0.298186000 | 2.125259000  | 0.430353000  |
| 6  | -1.672325000 | 2.436124000  | 0.313000000  |
| 6  | -2.248495000 | 2.905062000  | -0.866235000 |
| 6  | -2.505041000 | 2.146343000  | 1.390515000  |
| 6  | -3.617503000 | 3.067717000  | -0.956002000 |
| 1  | -1.615284000 | 3.138118000  | -1.711743000 |
| 6  | -3.877574000 | 2.297912000  | 1.290990000  |
| 1  | -2.066503000 | 1.800013000  | 2.322663000  |
| 6  | -4.442589000 | 2.760994000  | 0.116103000  |
| 1  | -4.048053000 | 3.430536000  | -1.882716000 |
| 1  | -4.503668000 | 2.055437000  | 2.141983000  |
| 1  | -5.515851000 | 2.886492000  | 0.035375000  |
| 13 | 0.065541000  | 0.437904000  | 1.258762000  |
| 1  | 0.540271000  | 0.573896000  | 2.781852000  |
| 6  | -2.805773000 | -1.844396000 | -0.955326000 |
| 6  | -3.214208000 | -2.356091000 | 0.452906000  |
| 5  | -1.436386000 | -0.934473000 | 0.628851000  |
| 8  | -2.491920000 | -1.472717000 | 1.324742000  |
| 8  | -1.501794000 | -1.291524000 | -0.707863000 |
| 6  | -4.688735000 | -2.251608000 | 0.761299000  |
| 1  | -5.276642000 | -2.836776000 | 0.048041000  |
| 1  | -4.882626000 | -2.642590000 | 1.762045000  |

|   |              |              |              |
|---|--------------|--------------|--------------|
| 1 | -5.029613000 | -1.216496000 | 0.732074000  |
| 6 | -2.719750000 | -3.761368000 | 0.745746000  |
| 1 | -2.856494000 | -3.963924000 | 1.809461000  |
| 1 | -3.272138000 | -4.514276000 | 0.178588000  |
| 1 | -1.655367000 | -3.860357000 | 0.518040000  |
| 6 | -2.695386000 | -2.911946000 | -2.017532000 |
| 1 | -3.660385000 | -3.401790000 | -2.176528000 |
| 1 | -2.389728000 | -2.455397000 | -2.961601000 |
| 1 | -1.959840000 | -3.672597000 | -1.754723000 |
| 6 | -3.675395000 | -0.705395000 | -1.455595000 |
| 1 | -3.198781000 | -0.261484000 | -2.331981000 |
| 1 | -4.670865000 | -1.051579000 | -1.743180000 |
| 1 | -3.780281000 | 0.081901000  | -0.704781000 |

**13AIP<sup>B-H</sup>** (T.E = -2254.735357)

|    |              |              |              |
|----|--------------|--------------|--------------|
| 7  | -1.579539000 | -0.785902000 | 0.083180000  |
| 6  | -1.637720000 | -1.936787000 | -0.771453000 |
| 6  | -0.518981000 | -2.668672000 | -1.151049000 |
| 6  | 0.764921000  | -2.392098000 | -0.703565000 |
| 1  | -0.651699000 | -3.496984000 | -1.838362000 |
| 13 | -0.108508000 | -0.164535000 | 1.065934000  |
| 15 | -3.218121000 | -0.740895000 | -0.015799000 |
| 6  | -3.003441000 | -2.075848000 | -1.073496000 |
| 6  | -3.747900000 | -3.085391000 | -1.858537000 |
| 1  | -3.156614000 | -3.416484000 | -2.717515000 |
| 1  | -4.007692000 | -3.986839000 | -1.287140000 |
| 1  | -4.681340000 | -2.682233000 | -2.258435000 |
| 7  | 1.077844000  | -1.380587000 | 0.268614000  |
| 6  | 2.015399000  | -2.941300000 | -1.044813000 |
| 15 | 2.653863000  | -1.758609000 | 0.014264000  |
| 6  | 2.419763000  | -3.919321000 | -2.079882000 |
| 1  | 2.122437000  | -4.946527000 | -1.841489000 |
| 1  | 1.987231000  | -3.681942000 | -3.060174000 |
| 1  | 3.505762000  | -3.927541000 | -2.204233000 |
| 7  | 3.618820000  | -0.585975000 | -0.660050000 |
| 7  | 3.434536000  | -2.083915000 | 1.444620000  |
| 6  | 4.001549000  | 0.557652000  | 0.160291000  |
| 1  | 3.160606000  | 1.245162000  | 0.327809000  |
| 1  | 4.362744000  | 0.230938000  | 1.133196000  |
| 1  | 4.802318000  | 1.105734000  | -0.343806000 |
| 6  | 3.240677000  | -0.197202000 | -2.012091000 |
| 1  | 2.309211000  | 0.387059000  | -2.023792000 |
| 1  | 4.037611000  | 0.414410000  | -2.442143000 |
| 1  | 3.099517000  | -1.078404000 | -2.636786000 |
| 6  | 2.661989000  | -2.776646000 | 2.464778000  |
| 1  | 3.180253000  | -2.679476000 | 3.421756000  |
| 1  | 1.671659000  | -2.333747000 | 2.560396000  |
| 1  | 2.553476000  | -3.845831000 | 2.236498000  |

|   |              |              |              |
|---|--------------|--------------|--------------|
| 6 | 4.804373000  | -2.560271000 | 1.367022000  |
| 1 | 4.844726000  | -3.640724000 | 1.167776000  |
| 1 | 5.348673000  | -2.044280000 | 0.576477000  |
| 1 | 5.311766000  | -2.372293000 | 2.317279000  |
| 7 | -3.755327000 | 0.758922000  | -0.464730000 |
| 7 | -4.043911000 | -1.005100000 | 1.402706000  |
| 6 | -5.152532000 | 1.134404000  | -0.400984000 |
| 1 | -5.236772000 | 2.196274000  | -0.147661000 |
| 1 | -5.652764000 | 0.980007000  | -1.365891000 |
| 1 | -5.676524000 | 0.553748000  | 0.356056000  |
| 6 | -3.029630000 | 1.433562000  | -1.528584000 |
| 1 | -1.981879000 | 1.138316000  | -1.526934000 |
| 1 | -3.469389000 | 1.213875000  | -2.509610000 |
| 1 | -3.066937000 | 2.514016000  | -1.362995000 |
| 6 | -4.013141000 | -2.370558000 | 1.903783000  |
| 1 | -4.770674000 | -2.479263000 | 2.684046000  |
| 1 | -4.231246000 | -3.077190000 | 1.104660000  |
| 1 | -3.033578000 | -2.621667000 | 2.334291000  |
| 6 | -3.853652000 | -0.033731000 | 2.474090000  |
| 1 | -3.812060000 | 0.979203000  | 2.074887000  |
| 1 | -4.688683000 | -0.095970000 | 3.177407000  |
| 1 | -2.919552000 | -0.225720000 | 3.019452000  |
| 1 | -0.283723000 | -0.461228000 | 2.637494000  |
| 6 | 0.633533000  | 3.709967000  | -0.824003000 |
| 6 | 1.110344000  | 4.035816000  | 0.616784000  |
| 8 | -0.061897000 | 2.468395000  | -0.640413000 |
| 8 | 1.216647000  | 2.732717000  | 1.207762000  |
| 5 | 0.388911000  | 1.862670000  | 0.521655000  |
| 6 | -0.313859000 | 4.719107000  | -1.429588000 |
| 1 | 0.165381000  | 5.698540000  | -1.517508000 |
| 1 | -0.602213000 | 4.392536000  | -2.431260000 |
| 1 | -1.221316000 | 4.828943000  | -0.836163000 |
| 6 | 1.774986000  | 3.445231000  | -1.789700000 |
| 1 | 1.365654000  | 3.003036000  | -2.700477000 |
| 1 | 2.300464000  | 4.364360000  | -2.058952000 |
| 1 | 2.497850000  | 2.741324000  | -1.371489000 |
| 6 | 2.447558000  | 4.733078000  | 0.704122000  |
| 1 | 2.416695000  | 5.696284000  | 0.186344000  |
| 1 | 2.694667000  | 4.919519000  | 1.750967000  |
| 1 | 3.247911000  | 4.131736000  | 0.272356000  |
| 6 | 0.079880000  | 4.802136000  | 1.427518000  |
| 1 | 0.393519000  | 4.806811000  | 2.472791000  |
| 1 | -0.014835000 | 5.837442000  | 1.091524000  |
| 1 | -0.900371000 | 4.323472000  | 1.373946000  |

**1GaP<sup>B-H</sup>** (T.E = -3024.841936)

|   |              |              |              |
|---|--------------|--------------|--------------|
| 7 | 1.306690000  | -2.079171000 | -0.035983000 |
| 7 | -1.583705000 | -1.911340000 | -0.069283000 |



|    |              |              |              |
|----|--------------|--------------|--------------|
| 6  | 1.021504000  | -3.133267000 | 0.693938000  |
| 6  | -1.437395000 | -2.992252000 | 0.662034000  |
| 6  | -0.244873000 | -3.657694000 | 0.925526000  |
| 1  | -0.304950000 | -4.570731000 | 1.501144000  |
| 6  | 2.561301000  | -1.460342000 | 0.063855000  |
| 6  | 3.239115000  | -1.357926000 | 1.276660000  |
| 6  | 3.109528000  | -0.857888000 | -1.067107000 |
| 6  | 4.450277000  | -0.692800000 | 1.345453000  |
| 6  | 4.315763000  | -0.188801000 | -0.989595000 |
| 6  | 4.995034000  | -0.105633000 | 0.215607000  |
| 1  | 4.962485000  | -0.615519000 | 2.297689000  |
| 1  | 4.728304000  | 0.271448000  | -1.879815000 |
| 1  | 5.938159000  | 0.423860000  | 0.275857000  |
| 6  | -2.768709000 | -1.164305000 | -0.004977000 |
| 6  | -3.220267000 | -0.512016000 | -1.150431000 |
| 6  | -3.467594000 | -0.993052000 | 1.187503000  |
| 6  | -4.354868000 | 0.275844000  | -1.106683000 |
| 6  | -4.606657000 | -0.209327000 | 1.222522000  |
| 6  | -5.056332000 | 0.428916000  | 0.078527000  |
| 1  | -4.695693000 | 0.771125000  | -2.008402000 |
| 1  | -5.135914000 | -0.079517000 | 2.159641000  |
| 1  | -5.943129000 | 1.050172000  | 0.112271000  |
| 1  | -3.086172000 | -1.441012000 | 2.098102000  |
| 1  | -2.683256000 | -0.646830000 | -2.084401000 |
| 1  | 2.586202000  | -0.932933000 | -2.015358000 |
| 1  | 2.789260000  | -1.764601000 | 2.175365000  |
| 31 | -0.079943000 | -1.176134000 | -1.189235000 |
| 1  | -2.337243000 | -3.393665000 | 1.135224000  |
| 1  | 1.857660000  | -3.630750000 | 1.192199000  |
| 1  | -0.107643000 | -1.903725000 | -2.585009000 |
| 6  | 0.635299000  | 2.988360000  | -0.333701000 |
| 6  | -0.190435000 | 2.507789000  | 0.889596000  |
| 5  | 0.057273000  | 0.818786000  | -0.600664000 |
| 8  | 0.382542000  | 1.947186000  | -1.300378000 |
| 8  | -0.152691000 | 1.077354000  | 0.730703000  |
| 6  | -1.652715000 | 2.910018000  | 0.825290000  |
| 1  | -2.203266000 | 2.342954000  | 1.578866000  |
| 1  | -1.790154000 | 3.975447000  | 1.023210000  |
| 1  | -2.088746000 | 2.673042000  | -0.148242000 |
| 6  | 0.392873000  | 2.871346000  | 2.232740000  |
| 1  | 0.472974000  | 3.957303000  | 2.336244000  |
| 1  | -0.259147000 | 2.502805000  | 3.026935000  |
| 1  | 1.380081000  | 2.431650000  | 2.374592000  |
| 6  | 0.205608000  | 4.315131000  | -0.908610000 |
| 1  | 0.301622000  | 5.105278000  | -0.158321000 |
| 1  | 0.843986000  | 4.573316000  | -1.755565000 |
| 1  | -0.825987000 | 4.289283000  | -1.258120000 |
| 6  | 2.132008000  | 2.987443000  | -0.080165000 |
| 1  | 2.646864000  | 3.113388000  | -1.034666000 |

|   |             |             |             |
|---|-------------|-------------|-------------|
| 1 | 2.430528000 | 3.803215000 | 0.581929000 |
| 1 | 2.464541000 | 2.041216000 | 0.354616000 |

**4GaP<sup>B-H</sup>** (T.E = -3237.624762)

|    |              |              |              |
|----|--------------|--------------|--------------|
| 7  | 0.214539000  | -2.235724000 | -0.083806000 |
| 6  | -0.402713000 | -3.053228000 | -0.924919000 |
| 6  | -1.717681000 | -3.004813000 | -1.341403000 |
| 6  | -2.647478000 | -1.995887000 | -1.027492000 |
| 6  | -2.458282000 | -0.934541000 | -0.184638000 |
| 6  | 1.605967000  | -2.300494000 | 0.056488000  |
| 6  | 2.177150000  | -2.014929000 | 1.296200000  |
| 6  | 2.450824000  | -2.559728000 | -1.022017000 |
| 6  | 3.549552000  | -1.992477000 | 1.451364000  |
| 1  | 1.524297000  | -1.815373000 | 2.140069000  |
| 6  | 3.823741000  | -2.538089000 | -0.859466000 |
| 1  | 2.024635000  | -2.723326000 | -2.005298000 |
| 6  | 4.383765000  | -2.252939000 | 0.375313000  |
| 1  | 3.972363000  | -1.769509000 | 2.424714000  |
| 1  | 4.463901000  | -2.727436000 | -1.714121000 |
| 1  | 5.460249000  | -2.229241000 | 0.496790000  |
| 1  | 0.202695000  | -3.866808000 | -1.332343000 |
| 15 | -3.645104000 | 0.262472000  | 0.044994000  |
| 6  | -5.231689000 | -0.024199000 | -0.767228000 |
| 1  | -5.917808000 | 0.792007000  | -0.535576000 |
| 1  | -5.093224000 | -0.075505000 | -1.847796000 |
| 1  | -5.663011000 | -0.964258000 | -0.421512000 |
| 6  | -4.010844000 | 0.495856000  | 1.793439000  |
| 1  | -4.405846000 | -0.431128000 | 2.210261000  |
| 1  | -3.080672000 | 0.732782000  | 2.314690000  |
| 1  | -4.726062000 | 1.307256000  | 1.940144000  |
| 6  | -3.098209000 | 1.890104000  | -0.506326000 |
| 1  | -2.904541000 | 1.859497000  | -1.579661000 |
| 1  | -3.853216000 | 2.648752000  | -0.289549000 |
| 1  | -2.165548000 | 2.147536000  | 0.005089000  |
| 1  | -3.607537000 | -2.104395000 | -1.542961000 |
| 1  | -2.037526000 | -3.794157000 | -2.009951000 |
| 31 | -0.724622000 | -0.723684000 | 0.845022000  |
| 1  | -0.939975000 | -1.084913000 | 2.385356000  |
| 6  | 1.138345000  | 3.080537000  | -0.131920000 |
| 6  | 2.269849000  | 2.063547000  | -0.438004000 |
| 5  | 0.431058000  | 0.955544000  | 0.310586000  |
| 8  | 0.208083000  | 2.281893000  | 0.626827000  |
| 8  | 1.554628000  | 0.820551000  | -0.466711000 |
| 6  | 0.404320000  | 3.545603000  | -1.376518000 |
| 1  | -0.494241000 | 4.087566000  | -1.072583000 |
| 1  | 1.017220000  | 4.217550000  | -1.981406000 |
| 1  | 0.100326000  | 2.698161000  | -1.995775000 |
| 6  | 1.558857000  | 4.272143000  | 0.693046000  |

|   |             |             |              |
|---|-------------|-------------|--------------|
| 1 | 2.333855000 | 4.843416000 | 0.173709000  |
| 1 | 0.703229000 | 4.931397000 | 0.853364000  |
| 1 | 1.941425000 | 3.972458000 | 1.668012000  |
| 6 | 2.972211000 | 2.257736000 | -1.759934000 |
| 1 | 3.471266000 | 3.230610000 | -1.795262000 |
| 1 | 3.729662000 | 1.480327000 | -1.880073000 |
| 1 | 2.282508000 | 2.186012000 | -2.600426000 |
| 6 | 3.294807000 | 1.948594000 | 0.676578000  |
| 1 | 3.906577000 | 1.063404000 | 0.489678000  |
| 1 | 3.948954000 | 2.822443000 | 0.721229000  |
| 1 | 2.812186000 | 1.817997000 | 1.647989000  |

**6GaP<sup>B-H</sup>** (T.E = -3368.206266)

|    |              |              |              |
|----|--------------|--------------|--------------|
| 6  | -2.758087000 | 1.267348000  | 0.604238000  |
| 6  | -2.236447000 | 0.285017000  | -0.235394000 |
| 6  | -0.698896000 | 2.729810000  | 0.516509000  |
| 1  | -0.295077000 | 3.645447000  | 0.958637000  |
| 7  | 0.088233000  | 2.023399000  | -0.224857000 |
| 15 | -3.226055000 | -1.099689000 | -0.272761000 |
| 6  | -3.423156000 | -1.953556000 | 1.308351000  |
| 1  | -3.837264000 | -1.252264000 | 2.032433000  |
| 1  | -4.082862000 | -2.818072000 | 1.209263000  |
| 1  | -2.439291000 | -2.283604000 | 1.647232000  |
| 6  | -4.910461000 | -0.853674000 | -0.878348000 |
| 1  | -4.866399000 | -0.466406000 | -1.897011000 |
| 1  | -5.467328000 | -1.792955000 | -0.868672000 |
| 1  | -5.401208000 | -0.121116000 | -0.238293000 |
| 6  | -2.507271000 | -2.332683000 | -1.369612000 |
| 1  | -1.519308000 | -2.631049000 | -1.007978000 |
| 1  | -3.154255000 | -3.210243000 | -1.419615000 |
| 1  | -2.396204000 | -1.913323000 | -2.371685000 |
| 8  | -3.823756000 | 1.245637000  | 1.226042000  |
| 7  | -1.978116000 | 2.502112000  | 0.824324000  |
| 6  | -2.671559000 | 3.512789000  | 1.609354000  |
| 1  | -3.592717000 | 3.811164000  | 1.110177000  |
| 1  | -2.940575000 | 3.124360000  | 2.590915000  |
| 1  | -2.027965000 | 4.384281000  | 1.720630000  |
| 6  | 1.457807000  | 2.359455000  | -0.267293000 |
| 6  | 2.128964000  | 2.289426000  | -1.482810000 |
| 6  | 2.167371000  | 2.671558000  | 0.886674000  |
| 6  | 3.485267000  | 2.547414000  | -1.541844000 |
| 1  | 1.571132000  | 2.028945000  | -2.376121000 |
| 6  | 3.524556000  | 2.932533000  | 0.819969000  |
| 1  | 1.662406000  | 2.650744000  | 1.846210000  |
| 6  | 4.189440000  | 2.872374000  | -0.392879000 |
| 1  | 3.997681000  | 2.492754000  | -2.495349000 |
| 1  | 4.069359000  | 3.164091000  | 1.728077000  |
| 1  | 5.254183000  | 3.067022000  | -0.441666000 |

|    |              |              |              |
|----|--------------|--------------|--------------|
| 31 | -0.511408000 | 0.332247000  | -1.222189000 |
| 1  | -0.594806000 | 0.739437000  | -2.757220000 |
| 6  | 1.795219000  | -2.984568000 | 0.303382000  |
| 6  | 2.665729000  | -1.777832000 | 0.741357000  |
| 8  | 0.963496000  | -2.402804000 | -0.717949000 |
| 8  | 1.782406000  | -0.672886000 | 0.499286000  |
| 6  | 2.562062000  | -4.147328000 | -0.276064000 |
| 1  | 3.267535000  | -4.545608000 | 0.459008000  |
| 1  | 1.870629000  | -4.946967000 | -0.549188000 |
| 1  | 3.114785000  | -3.859569000 | -1.169659000 |
| 6  | 0.858089000  | -3.469478000 | 1.395731000  |
| 1  | 0.132904000  | -4.156238000 | 0.952484000  |
| 1  | 1.391033000  | -4.000057000 | 2.187883000  |
| 1  | 0.309305000  | -2.635215000 | 1.840934000  |
| 6  | 3.883672000  | -1.562082000 | -0.139037000 |
| 1  | 4.296970000  | -0.575438000 | 0.082314000  |
| 1  | 4.657000000  | -2.312020000 | 0.042746000  |
| 1  | 3.615894000  | -1.580754000 | -1.197791000 |
| 6  | 3.074323000  | -1.773174000 | 2.194407000  |
| 1  | 3.686403000  | -2.649273000 | 2.427772000  |
| 1  | 3.667440000  | -0.879205000 | 2.399451000  |
| 1  | 2.210335000  | -1.762391000 | 2.858336000  |
| 5  | 0.883410000  | -1.047813000 | -0.472085000 |

**8GaP<sup>B-H</sup>** (T.E = -3602.251425)

|    |              |              |              |
|----|--------------|--------------|--------------|
| 7  | -1.247044000 | -1.400551000 | 0.126442000  |
| 6  | -1.287144000 | -0.905141000 | 1.457988000  |
| 6  | -0.051381000 | -0.484504000 | 2.116794000  |
| 15 | -2.895186000 | -1.229152000 | 0.152188000  |
| 6  | -2.604147000 | -0.781401000 | 1.815760000  |
| 6  | -3.289963000 | -0.335580000 | 3.047889000  |
| 1  | -3.926782000 | -1.110960000 | 3.483768000  |
| 1  | -2.553079000 | -0.059821000 | 3.806513000  |
| 1  | -3.924372000 | 0.541716000  | 2.883739000  |
| 7  | -3.632997000 | -0.063382000 | -0.735526000 |
| 7  | -3.616942000 | -2.623955000 | -0.344524000 |
| 6  | -3.858417000 | -0.212544000 | -2.165562000 |
| 1  | -3.130344000 | 0.381051000  | -2.727511000 |
| 1  | -3.752570000 | -1.252292000 | -2.470676000 |
| 1  | -4.867885000 | 0.129543000  | -2.416178000 |
| 6  | -3.583513000 | 1.332916000  | -0.323155000 |
| 1  | -4.535429000 | 1.813081000  | -0.567374000 |
| 1  | -3.408075000 | 1.416577000  | 0.747571000  |
| 1  | -2.778329000 | 1.869469000  | -0.838301000 |
| 6  | -5.057160000 | -2.745760000 | -0.444655000 |
| 1  | -5.323194000 | -3.299539000 | -1.350911000 |
| 1  | -5.467634000 | -3.287577000 | 0.415721000  |
| 1  | -5.527869000 | -1.764843000 | -0.491091000 |

|    |              |              |              |
|----|--------------|--------------|--------------|
| 6  | -2.934864000 | -3.894853000 | -0.175285000 |
| 1  | -1.859581000 | -3.736380000 | -0.125009000 |
| 1  | -3.265235000 | -4.404667000 | 0.737673000  |
| 1  | -3.159398000 | -4.542378000 | -1.027869000 |
| 6  | -0.203045000 | 2.498929000  | -0.340795000 |
| 6  | -0.751242000 | 3.497886000  | 0.479623000  |
| 6  | 0.053574000  | 2.842664000  | -1.674746000 |
| 6  | -1.031587000 | 4.758693000  | -0.009326000 |
| 1  | -0.973741000 | 3.250979000  | 1.514423000  |
| 6  | -0.238004000 | 4.104456000  | -2.160397000 |
| 1  | 0.498815000  | 2.100671000  | -2.330403000 |
| 6  | -0.784475000 | 5.075565000  | -1.337059000 |
| 1  | -1.461238000 | 5.502146000  | 0.654030000  |
| 1  | -0.025956000 | 4.332787000  | -3.199504000 |
| 1  | -1.011048000 | 6.062799000  | -1.721037000 |
| 7  | 0.004913000  | 1.220729000  | 0.136927000  |
| 5  | 0.481374000  | 0.893261000  | 1.439061000  |
| 7  | 1.475330000  | 1.638854000  | 2.136788000  |
| 6  | 2.270640000  | 2.662710000  | 1.498510000  |
| 1  | 2.167314000  | 2.617141000  | 0.415226000  |
| 1  | 1.993951000  | 3.672687000  | 1.827834000  |
| 1  | 3.330326000  | 2.513727000  | 1.744636000  |
| 6  | 1.871023000  | 1.441502000  | 3.506495000  |
| 1  | 1.254410000  | 0.695244000  | 4.003150000  |
| 1  | 2.917491000  | 1.111804000  | 3.575085000  |
| 1  | 1.791112000  | 2.375983000  | 4.077264000  |
| 1  | -0.220426000 | -0.360652000 | 3.188266000  |
| 1  | 0.722521000  | -1.251754000 | 1.980474000  |
| 31 | -0.019605000 | -0.357154000 | -1.076031000 |
| 1  | -0.867782000 | -0.079816000 | -2.382141000 |
| 6  | 3.783087000  | -1.796871000 | 0.216664000  |
| 6  | 4.226172000  | -1.000350000 | -1.040863000 |
| 5  | 1.952344000  | -1.037756000 | -0.897137000 |
| 8  | 2.385420000  | -2.025852000 | -0.041414000 |
| 8  | 3.009272000  | -0.338922000 | -1.427139000 |
| 6  | 3.857571000  | -0.980560000 | 1.495337000  |
| 1  | 3.346111000  | -1.528823000 | 2.290540000  |
| 1  | 4.889349000  | -0.807679000 | 1.809395000  |
| 1  | 3.353527000  | -0.016877000 | 1.379156000  |
| 6  | 4.478475000  | -3.122113000 | 0.410772000  |
| 1  | 5.556391000  | -2.976647000 | 0.527322000  |
| 1  | 4.102599000  | -3.603959000 | 1.315436000  |
| 1  | 4.305914000  | -3.796716000 | -0.427121000 |
| 6  | 4.633211000  | -1.890282000 | -2.200515000 |
| 1  | 4.722212000  | -1.274770000 | -3.097327000 |
| 1  | 5.595119000  | -2.375552000 | -2.019824000 |
| 1  | 3.882572000  | -2.659604000 | -2.392806000 |
| 6  | 5.291198000  | 0.040479000  | -0.791011000 |
| 1  | 6.202242000  | -0.423931000 | -0.402372000 |

|   |             |             |              |
|---|-------------|-------------|--------------|
| 1 | 5.539898000 | 0.541683000 | -1.728287000 |
| 1 | 4.954664000 | 0.798956000 | -0.084069000 |

**10GaP<sup>B-H</sup>** (T.E = -3693.748745)

|    |              |              |              |
|----|--------------|--------------|--------------|
| 7  | -1.405008000 | 0.805906000  | 0.114470000  |
| 6  | -1.810209000 | 1.653068000  | -0.958646000 |
| 6  | -1.013168000 | 2.658880000  | -1.497693000 |
| 6  | 0.298240000  | 2.933666000  | -1.111555000 |
| 1  | -1.453801000 | 3.252524000  | -2.291372000 |
| 1  | 0.747982000  | 3.753221000  | -1.683446000 |
| 15 | -2.849532000 | 0.047638000  | -0.048290000 |
| 6  | -3.103111000 | 1.202546000  | -1.290298000 |
| 6  | -4.051409000 | 1.564042000  | -2.367911000 |
| 1  | -4.545308000 | 2.530265000  | -2.211420000 |
| 1  | -3.558617000 | 1.614426000  | -3.347029000 |
| 1  | -4.844839000 | 0.815558000  | -2.450921000 |
| 6  | 1.069356000  | 2.322532000  | -0.136859000 |
| 15 | 2.700411000  | 2.725754000  | 0.050847000  |
| 6  | 3.193520000  | 4.351857000  | -0.571413000 |
| 1  | 4.251394000  | 4.524039000  | -0.365890000 |
| 1  | 3.033466000  | 4.403542000  | -1.649037000 |
| 1  | 2.597256000  | 5.127761000  | -0.090573000 |
| 6  | 3.860047000  | 1.574932000  | -0.729724000 |
| 1  | 4.897789000  | 1.861062000  | -0.542231000 |
| 1  | 3.673261000  | 0.577206000  | -0.322244000 |
| 1  | 3.671700000  | 1.553486000  | -1.804599000 |
| 6  | 3.193318000  | 2.681594000  | 1.783753000  |
| 1  | 2.578681000  | 3.373911000  | 2.359469000  |
| 1  | 3.023655000  | 1.673392000  | 2.169067000  |
| 1  | 4.249849000  | 2.932840000  | 1.894386000  |
| 31 | 0.348261000  | 0.787328000  | 0.974214000  |
| 7  | -2.916746000 | -1.546380000 | -0.482977000 |
| 7  | -3.681490000 | 0.051223000  | 1.397132000  |
| 6  | -2.734219000 | -2.626081000 | 0.472814000  |
| 1  | -1.684018000 | -2.938260000 | 0.506012000  |
| 1  | -3.031922000 | -2.308305000 | 1.469972000  |
| 1  | -3.349735000 | -3.482088000 | 0.176797000  |
| 6  | -2.447190000 | -1.892780000 | -1.813728000 |
| 1  | -2.969100000 | -2.790107000 | -2.159745000 |
| 1  | -2.649480000 | -1.077956000 | -2.508898000 |
| 1  | -1.368338000 | -2.093300000 | -1.808832000 |
| 6  | -5.084075000 | -0.319804000 | 1.329465000  |
| 1  | -5.439049000 | -0.600092000 | 2.325054000  |
| 1  | -5.704952000 | 0.513192000  | 0.967368000  |
| 1  | -5.228502000 | -1.169351000 | 0.661631000  |
| 6  | -3.457454000 | 1.197763000  | 2.264990000  |
| 1  | -2.391277000 | 1.379365000  | 2.391989000  |
| 1  | -3.926777000 | 2.108727000  | 1.866814000  |

|   |              |              |              |
|---|--------------|--------------|--------------|
| 1 | -3.896506000 | 0.984950000  | 3.242855000  |
| 1 | 0.166584000  | 1.171136000  | 2.518080000  |
| 6 | 2.821275000  | -2.564821000 | -0.237802000 |
| 6 | 1.443649000  | -3.263896000 | -0.108109000 |
| 5 | 1.256920000  | -1.061298000 | 0.491607000  |
| 8 | 2.611732000  | -1.347607000 | 0.499731000  |
| 8 | 0.549465000  | -2.145009000 | 0.007345000  |
| 6 | 3.152505000  | -2.163730000 | -1.664885000 |
| 1 | 4.036852000  | -1.523051000 | -1.653807000 |
| 1 | 3.372682000  | -3.031372000 | -2.290715000 |
| 1 | 2.333037000  | -1.599967000 | -2.117998000 |
| 6 | 3.980260000  | -3.320976000 | 0.364720000  |
| 1 | 4.104691000  | -4.290449000 | -0.126603000 |
| 1 | 4.901710000  | -2.751851000 | 0.225540000  |
| 1 | 3.844518000  | -3.485601000 | 1.433001000  |
| 6 | 1.035695000  | -4.100990000 | -1.296984000 |
| 1 | 1.746204000  | -4.916845000 | -1.458510000 |
| 1 | 0.052532000  | -4.541757000 | -1.114916000 |
| 1 | 0.973641000  | -3.507063000 | -2.208793000 |
| 6 | 1.305083000  | -4.076788000 | 1.166698000  |
| 1 | 0.257475000  | -4.358539000 | 1.291021000  |
| 1 | 1.901636000  | -4.991219000 | 1.131841000  |
| 1 | 1.602199000  | -3.495386000 | 2.041695000  |

**11GaP<sup>B-H</sup>** (T.E = -3611.550431)

|    |              |              |              |
|----|--------------|--------------|--------------|
| 7  | -1.565162000 | -0.431591000 | -0.418383000 |
| 6  | -2.116005000 | -1.477884000 | 0.325061000  |
| 6  | -0.073731000 | -2.939588000 | 0.375974000  |
| 7  | 0.690187000  | -2.048993000 | -0.273897000 |
| 15 | -2.885541000 | 0.456746000  | 0.006191000  |
| 6  | -3.337463000 | -0.998708000 | 0.821284000  |
| 6  | -4.357176000 | -1.407264000 | 1.822304000  |
| 1  | -5.082790000 | -2.136547000 | 1.447907000  |
| 1  | -3.917252000 | -1.824918000 | 2.733198000  |
| 1  | -4.932622000 | -0.528352000 | 2.128372000  |
| 6  | 2.091566000  | -2.208303000 | -0.180000000 |
| 6  | 2.865322000  | -2.028368000 | -1.321417000 |
| 6  | 2.738954000  | -2.436860000 | 1.033366000  |
| 6  | 4.247611000  | -2.060619000 | -1.255789000 |
| 1  | 2.370915000  | -1.863074000 | -2.274287000 |
| 6  | 4.118321000  | -2.478220000 | 1.092914000  |
| 1  | 2.149877000  | -2.586015000 | 1.929146000  |
| 6  | 4.883318000  | -2.287749000 | -0.048556000 |
| 1  | 4.827859000  | -1.911242000 | -2.159086000 |
| 1  | 4.603564000  | -2.657232000 | 2.046103000  |
| 1  | 5.965222000  | -2.320473000 | 0.004818000  |
| 31 | 0.143031000  | -0.488143000 | -1.377250000 |
| 7  | -2.708271000 | 1.789893000  | 0.948058000  |

|   |              |              |              |
|---|--------------|--------------|--------------|
| 7 | -3.670235000 | 1.019429000  | -1.338227000 |
| 6 | -2.367850000 | 3.092619000  | 0.392810000  |
| 1 | -2.723795000 | 3.181372000  | -0.631216000 |
| 1 | -2.834122000 | 3.874594000  | 0.998977000  |
| 1 | -1.281996000 | 3.233601000  | 0.396145000  |
| 6 | -2.153337000 | 1.592836000  | 2.280873000  |
| 1 | -2.476968000 | 0.637212000  | 2.692109000  |
| 1 | -1.057238000 | 1.614367000  | 2.250077000  |
| 1 | -2.505554000 | 2.392954000  | 2.936765000  |
| 6 | -4.993412000 | 1.587572000  | -1.126385000 |
| 1 | -5.245537000 | 2.247082000  | -1.960576000 |
| 1 | -5.759640000 | 0.802286000  | -1.065125000 |
| 1 | -5.024533000 | 2.170262000  | -0.205865000 |
| 6 | -3.610447000 | 0.193460000  | -2.537186000 |
| 1 | -2.591292000 | -0.136226000 | -2.732028000 |
| 1 | -4.257264000 | -0.690272000 | -2.452759000 |
| 1 | -3.952692000 | 0.789536000  | -3.385856000 |
| 8 | 0.287815000  | -3.962932000 | 0.915483000  |
| 7 | -1.504152000 | -2.667969000 | 0.460015000  |
| 6 | -2.277864000 | -3.751229000 | 1.050967000  |
| 1 | -2.165929000 | -3.792405000 | 2.136423000  |
| 1 | -3.325730000 | -3.614395000 | 0.792894000  |
| 1 | -1.926305000 | -4.696361000 | 0.647113000  |
| 1 | -0.149855000 | -0.917953000 | -2.871788000 |
| 6 | 3.112924000  | 2.206245000  | 0.114796000  |
| 6 | 1.834036000  | 2.940518000  | 0.596323000  |
| 5 | 1.283900000  | 1.120565000  | -0.666739000 |
| 8 | 2.599550000  | 1.375278000  | -0.941584000 |
| 8 | 0.804550000  | 1.969805000  | 0.312057000  |
| 6 | 4.195323000  | 3.100810000  | -0.437331000 |
| 1 | 4.538672000  | 3.805106000  | 0.326029000  |
| 1 | 5.047533000  | 2.491457000  | -0.743138000 |
| 1 | 3.854436000  | 3.663752000  | -1.305773000 |
| 6 | 3.694906000  | 1.269057000  | 1.157543000  |
| 1 | 4.422178000  | 0.614614000  | 0.671934000  |
| 1 | 4.196495000  | 1.815769000  | 1.959443000  |
| 1 | 2.925889000  | 0.626521000  | 1.593258000  |
| 6 | 1.797234000  | 3.267817000  | 2.069147000  |
| 1 | 2.621437000  | 3.934327000  | 2.338214000  |
| 1 | 0.860107000  | 3.776890000  | 2.309365000  |
| 1 | 1.861563000  | 2.369235000  | 2.682399000  |
| 6 | 1.520426000  | 4.180637000  | -0.220343000 |
| 1 | 0.522202000  | 4.539114000  | 0.039611000  |
| 1 | 2.229186000  | 4.985833000  | -0.015529000 |
| 1 | 1.535799000  | 3.964731000  | -1.290435000 |

**$^{13}\text{GaP}^{\text{B-H}}$  (T.E = -3937.096532)**

|   |              |              |              |
|---|--------------|--------------|--------------|
| 7 | -1.421632000 | -1.258577000 | -0.128975000 |
|---|--------------|--------------|--------------|



|    |              |              |              |
|----|--------------|--------------|--------------|
| 6  | -1.251761000 | -1.326873000 | 1.293589000  |
| 6  | -0.017415000 | -1.330592000 | 1.932970000  |
| 6  | 1.203379000  | -1.346718000 | 1.265621000  |
| 1  | -0.005963000 | -1.376875000 | 3.017212000  |
| 15 | -3.035604000 | -1.150531000 | 0.163544000  |
| 6  | -2.564027000 | -1.367449000 | 1.798866000  |
| 6  | -3.086846000 | -1.439523000 | 3.181820000  |
| 1  | -2.674465000 | -2.291937000 | 3.732735000  |
| 1  | -2.858854000 | -0.541559000 | 3.772340000  |
| 1  | -4.173008000 | -1.556031000 | 3.189271000  |
| 7  | 1.341516000  | -1.276472000 | -0.158005000 |
| 6  | 2.523900000  | -1.420631000 | 1.742928000  |
| 15 | 2.963260000  | -1.222105000 | 0.095016000  |
| 6  | 3.071529000  | -1.516719000 | 3.114855000  |
| 1  | 2.919033000  | -0.601006000 | 3.703102000  |
| 1  | 2.612359000  | -2.334532000 | 3.680851000  |
| 1  | 4.146870000  | -1.709054000 | 3.101611000  |
| 7  | 3.679177000  | -2.337192000 | -0.906036000 |
| 7  | 3.831235000  | 0.138595000  | -0.252888000 |
| 6  | 2.981572000  | -3.575281000 | -1.197999000 |
| 1  | 3.285473000  | -4.378676000 | -0.514988000 |
| 1  | 1.906827000  | -3.424725000 | -1.114076000 |
| 1  | 3.214599000  | -3.890628000 | -2.219647000 |
| 6  | 5.112257000  | -2.439910000 | -1.066899000 |
| 1  | 5.529902000  | -3.243371000 | -0.446366000 |
| 1  | 5.354715000  | -2.665359000 | -2.111120000 |
| 1  | 5.599915000  | -1.505318000 | -0.794791000 |
| 6  | 3.912657000  | 0.638804000  | -1.611260000 |
| 1  | 4.942832000  | 0.921634000  | -1.857702000 |
| 1  | 3.586386000  | -0.122024000 | -2.321463000 |
| 1  | 3.270539000  | 1.520213000  | -1.727845000 |
| 6  | 4.106154000  | 1.143447000  | 0.751380000  |
| 1  | 3.404490000  | 1.979273000  | 0.665268000  |
| 1  | 4.017693000  | 0.718922000  | 1.750015000  |
| 1  | 5.125197000  | 1.524179000  | 0.620222000  |
| 7  | -3.833733000 | -2.233848000 | -0.806745000 |
| 7  | -3.839558000 | 0.256199000  | -0.171074000 |
| 6  | -5.275051000 | -2.272123000 | -0.919259000 |
| 1  | -5.561119000 | -2.504487000 | -1.950771000 |
| 1  | -5.708282000 | -3.044295000 | -0.270338000 |
| 1  | -5.708799000 | -1.310675000 | -0.649773000 |
| 6  | -3.201473000 | -3.508059000 | -1.092387000 |
| 1  | -2.118898000 | -3.405586000 | -1.039451000 |
| 1  | -3.522491000 | -4.283896000 | -0.385752000 |
| 1  | -3.475632000 | -3.830749000 | -2.101325000 |
| 6  | -3.836326000 | 1.329484000  | 0.806018000  |
| 1  | -4.722438000 | 1.953774000  | 0.653049000  |
| 1  | -3.865481000 | 0.926038000  | 1.816787000  |
| 1  | -2.945934000 | 1.960293000  | 0.700763000  |

|    |              |              |              |
|----|--------------|--------------|--------------|
| 6  | -3.919782000 | 0.735029000  | -1.542433000 |
| 1  | -3.793497000 | -0.090391000 | -2.243531000 |
| 1  | -4.897033000 | 1.195401000  | -1.723989000 |
| 1  | -3.138998000 | 1.480542000  | -1.735403000 |
| 31 | -0.045386000 | -0.452585000 | -1.267829000 |
| 1  | -0.069433000 | -1.105280000 | -2.708473000 |
| 6  | 0.728681000  | 3.384154000  | 0.439521000  |
| 6  | -0.543911000 | 3.772025000  | -0.353799000 |
| 5  | 0.015150000  | 1.597737000  | -0.780724000 |
| 8  | 1.139812000  | 2.179654000  | -0.230663000 |
| 8  | -1.041412000 | 2.484631000  | -0.764596000 |
| 6  | 1.839998000  | 4.404794000  | 0.381228000  |
| 1  | 1.491307000  | 5.372863000  | 0.752289000  |
| 1  | 2.673857000  | 4.089616000  | 1.011650000  |
| 1  | 2.213703000  | 4.534470000  | -0.634949000 |
| 6  | 0.444422000  | 2.996831000  | 1.880581000  |
| 1  | 1.334418000  | 2.516371000  | 2.293789000  |
| 1  | 0.202921000  | 3.866351000  | 2.496428000  |
| 1  | -0.372683000 | 2.273146000  | 1.945629000  |
| 6  | -0.245188000 | 4.552240000  | -1.621030000 |
| 1  | -1.152716000 | 4.595697000  | -2.225958000 |
| 1  | 0.069877000  | 5.575009000  | -1.403204000 |
| 1  | 0.531181000  | 4.063817000  | -2.213316000 |
| 6  | -1.601649000 | 4.488342000  | 0.450316000  |
| 1  | -2.476446000 | 4.673458000  | -0.177536000 |
| 1  | -1.922628000 | 3.909775000  | 1.315930000  |
| 1  | -1.225883000 | 5.453752000  | 0.801150000  |

Cartesian coordinates of the different substrates which undergo activation by some of the representative Al(I)/Ga(I) carbenoids considered in this study and also their total energies (in hartrees) including the zero point vibrational correction that have been calculated at **M06-D3/Def2-TZVP** level of theory.

**Hydrogen** (T.E = -1.160821)

|   |             |             |              |
|---|-------------|-------------|--------------|
| 1 | 0.000000000 | 0.000000000 | 0.373371000  |
| 1 | 0.000000000 | 0.000000000 | -0.373371000 |

**Ammonia** (T.E = -56.506612)

|   |             |             |             |
|---|-------------|-------------|-------------|
| 7 | 0.000000000 | 0.000000000 | 0.112148000 |
|---|-------------|-------------|-------------|

|   |              |              |              |
|---|--------------|--------------|--------------|
| 1 | 0.000000000  | 0.940203000  | -0.261679000 |
| 1 | -0.814240000 | -0.470102000 | -0.261679000 |
| 1 | 0.814240000  | -0.470102000 | -0.261679000 |

**Hexa-fluorobenzene (T.E = -827.571894)**

|   |              |              |              |
|---|--------------|--------------|--------------|
| 6 | 0.373080000  | 1.333631000  | 0.000008000  |
| 6 | 1.341568000  | 0.343679000  | 0.000031000  |
| 6 | 0.968494000  | -0.989852000 | 0.000004000  |
| 6 | -0.373139000 | -1.333614000 | 0.000012000  |
| 6 | -1.341554000 | -0.343737000 | 0.000013000  |
| 6 | -0.968449000 | 0.989894000  | -0.000011000 |
| 9 | -1.888748000 | 1.930625000  | -0.000023000 |
| 9 | -2.616491000 | -0.670147000 | 0.000015000  |
| 9 | -0.727678000 | -2.600976000 | -0.000009000 |
| 9 | 1.888645000  | -1.930724000 | -0.000023000 |
| 9 | 2.616457000  | 0.670284000  | 0.000004000  |
| 9 | 0.727815000  | 2.600939000  | -0.000002000 |

**Pinacolborane (T.E = -411.568530)**

|   |              |              |              |
|---|--------------|--------------|--------------|
| 6 | -0.776031000 | -0.184705000 | 0.057389000  |
| 6 | 0.776115000  | -0.184425000 | -0.057541000 |
| 5 | -0.000365000 | 1.927358000  | 0.000312000  |
| 1 | -0.000772000 | 3.111447000  | 0.000099000  |
| 8 | -1.058120000 | 1.182319000  | 0.421228000  |
| 8 | 1.057832000  | 1.182904000  | -0.420565000 |
| 6 | -1.334596000 | -1.104214000 | 1.115395000  |
| 1 | -2.424103000 | -1.039902000 | 1.118541000  |
| 1 | -1.057103000 | -2.140905000 | 0.905426000  |
| 1 | -0.978254000 | -0.842044000 | 2.110875000  |
| 6 | -1.473963000 | -0.434394000 | -1.266213000 |
| 1 | -1.375241000 | -1.474748000 | -1.582719000 |
| 1 | -2.535561000 | -0.210882000 | -1.148822000 |
| 1 | -1.078528000 | 0.209295000  | -2.054688000 |
| 6 | 1.473828000  | -0.434642000 | 1.266054000  |
| 1 | 1.375639000  | -1.475286000 | 1.581778000  |
| 1 | 2.535321000  | -0.210383000 | 1.149136000  |
| 1 | 1.077735000  | 0.208229000  | 2.054873000  |
| 6 | 1.335196000  | -1.103267000 | -1.115885000 |
| 1 | 2.424691000  | -1.038757000 | -1.118623000 |
| 1 | 1.057838000  | -2.140132000 | -0.906584000 |
| 1 | 0.979167000  | -0.840621000 | -2.111344000 |
